# Supplementary material
Source: publisher figshare collection journal article supplement (https://acs.figshare.com/ndownloader/files/4298083)
Supplement: Supplementary file 1 [file 4298083]

 
data_compound1
 
_audit_creation_method            SHELXL-97
_chemical_name_systematic
;
 ?
;
_chemical_name_common             ?
_chemical_melting_point           ?
_chemical_formula_moiety          
'C54 H72 Li N4, C18 H54 Mg N3 Si6'
_chemical_formula_sum
 'C72 H126 Li Mg N7 Si6'
_chemical_formula_weight          1289.59
 
loop_
 _atom_type_symbol
 _atom_type_description
 _atom_type_scat_dispersion_real
 _atom_type_scat_dispersion_imag
 _atom_type_scat_source
 'C'  'C'   0.0033   0.0016
 'International Tables Vol C Tables 4.2.6.8 and 6.1.1.4'
 'H'  'H'   0.0000   0.0000
 'International Tables Vol C Tables 4.2.6.8 and 6.1.1.4'
 'N'  'N'   0.0061   0.0033
 'International Tables Vol C Tables 4.2.6.8 and 6.1.1.4'
 'Si'  'Si'   0.0817   0.0704
 'International Tables Vol C Tables 4.2.6.8 and 6.1.1.4'
 'Mg'  'Mg'   0.0486   0.0363
 'International Tables Vol C Tables 4.2.6.8 and 6.1.1.4'
 'Li'  'Li'  -0.0003   0.0001
 'International Tables Vol C Tables 4.2.6.8 and 6.1.1.4'
 
_symmetry_cell_setting            monoclinic
_symmetry_space_group_name_H-M    'P 1 21/n 1'
 
loop_
 _symmetry_equiv_pos_as_xyz
 'x, y, z'
 '-x+1/2, y+1/2, -z+1/2'
 '-x, -y, -z'
 'x-1/2, -y-1/2, z-1/2'
 
_cell_length_a                    20.9711(2)
_cell_length_b                    20.3806(2)
_cell_length_c                    21.1365(2)
_cell_angle_alpha                 90.00
_cell_angle_beta                  112.8540(10)
_cell_angle_gamma                 90.00
_cell_volume                      8324.64(14)
_cell_formula_units_Z             4
_cell_measurement_temperature     150(2)
_cell_measurement_reflns_used     233465
_cell_measurement_theta_min        2.910
_cell_measurement_theta_max        27.485
 
_exptl_crystal_description        block
_exptl_crystal_colour             colourless
_exptl_crystal_size_max           0.50
_exptl_crystal_size_mid           0.40
_exptl_crystal_size_min           0.40
_exptl_crystal_density_meas       ?
_exptl_crystal_density_diffrn     1.029
_exptl_crystal_density_method     'not measured'
_exptl_crystal_F_000              2824
_exptl_absorpt_coefficient_mu     0.148
_exptl_absorpt_correction_type    none
 
_exptl_special_details
;
 ?
;
 
_diffrn_ambient_temperature       150(2)
_diffrn_radiation_wavelength      0.71073
_diffrn_radiation_type            MoK\a
_diffrn_radiation_source          'fine-focus sealed tube'
_diffrn_radiation_monochromator   graphite
_diffrn_measurement_device_type   'Nonius Kappa CCD'
_diffrn_measurement_method        '506 1.0 degree images with \w scans'
_diffrn_standards_number          0
_diffrn_standards_decay_%         0
_diffrn_reflns_number             97063
_diffrn_reflns_av_R_equivalents   0.0577
_diffrn_reflns_av_sigmaI/netI     0.0439
_diffrn_reflns_limit_h_min        -27
_diffrn_reflns_limit_h_max        27
_diffrn_reflns_limit_k_min        -25
_diffrn_reflns_limit_k_max        26
_diffrn_reflns_limit_l_min        -27
_diffrn_reflns_limit_l_max        25
_diffrn_reflns_theta_min          4.62
_diffrn_reflns_theta_max          27.49
_reflns_number_total              18746
_reflns_number_gt                 13238
_reflns_threshold_expression      >2sigma(I)
 
_computing_data_collection        'Collect (Nonius BV, 1997-2000)'
_computing_cell_refinement         'HKL Scalepack (Otwinski & Minor, 1997)'
_computing_data_reduction         
;
 DENZO-SCALEPACK Z. Otwinowski and W. Minor, " 
 Processing of X-ray Diffraction Data Collected in Oscillation Mode ", 
 Methods in Enzymology, Volume 276: Macromolecular Crystallography, 
 part A, p.307-326, 1997,C.W. Carter, Jr. & R. M. Sweet, Eds., Academic Press.
;
_computing_structure_solution     
; 
 SIR97- Altomare A., Burla M.C., Camalli M., Cascarano G.L., Giacovazzo C. , 
 Guagliardi A., Moliterni A.G.G., Polidori G.,Spagna R. 
 (1999) J. Appl. Cryst. 32, 115-119
;
_computing_structure_refinement   
;
 SHELXL97 -Program for Crystal Structure Analysis (Release 97-2). 
 Sheldrick, G.M., Instit\"ut f\"ur Anorganische Chemie der Universit\"at, 
 Tammanstrasse 4, D-3400 G\"ottingen, Germany, 1998 
;
_computing_molecular_graphics  

'ORTEP3 for Windows - Farrugia, L. J. J. Appl. Crystallogr. 1997, 30, 565'

_computing_publication_material    
;
 'WinGX publication routines, Farrugia, 
 L. J., J. Appl. Crystallogr., 1999, 32, 837-838
; 
 
_refine_special_details
;
 Refinement of F^2^ against ALL reflections.  The weighted R-factor wR and
 goodness of fit S are based on F^2^, conventional R-factors R are based
 on F, with F set to zero for negative F^2^. The threshold expression of
 F^2^ > 2sigma(F^2^) is used only for calculating R-factors(gt) etc. and is
 not relevant to the choice of reflections for refinement.  R-factors based
 on F^2^ are statistically about twice as large as those based on F, and R-
 factors based on ALL data will be even larger.
;
 
_refine_ls_structure_factor_coef  Fsqd
_refine_ls_matrix_type            full
_refine_ls_weighting_scheme       calc
_refine_ls_weighting_details
 'calc w=1/[\s^2^(Fo^2^)+(0.0453P)^2^+6.6201P] where P=(Fo^2^+2Fc^2^)/3'
_atom_sites_solution_primary      direct
_atom_sites_solution_secondary    difmap
_atom_sites_solution_hydrogens    geom
_refine_ls_hydrogen_treatment     constr
_refine_ls_extinction_method      none
_refine_ls_extinction_coef        ?
_refine_ls_number_reflns          18746
_refine_ls_number_parameters      818
_refine_ls_number_restraints      0
_refine_ls_R_factor_all           0.0892
_refine_ls_R_factor_gt            0.0551
_refine_ls_wR_factor_ref          0.1447
_refine_ls_wR_factor_gt           0.1249
_refine_ls_goodness_of_fit_ref    1.060
_refine_ls_restrained_S_all       1.060
_refine_ls_shift/su_max           0.000
_refine_ls_shift/su_mean          0.000
 
loop_
 _atom_site_label
 _atom_site_type_symbol
 _atom_site_fract_x
 _atom_site_fract_y
 _atom_site_fract_z
 _atom_site_U_iso_or_equiv
 _atom_site_adp_type
 _atom_site_occupancy
 _atom_site_symmetry_multiplicity
 _atom_site_calc_flag
 _atom_site_refinement_flags
 _atom_site_disorder_assembly
 _atom_site_disorder_group
Mg Mg 0.33738(4) 0.21281(3) 0.14454(3) 0.02894(15) Uani 1 1 d . . .
Li Li 0.8282(2) 0.28814(18) 0.1345(2) 0.0440(9) Uani 1 1 d . . .
Si1 Si 0.48277(3) 0.21311(3) 0.27413(3) 0.03290(14) Uani 1 1 d . . .
Si2 Si 0.46625(3) 0.12128(3) 0.15856(3) 0.03635(15) Uani 1 1 d . . .
Si3 Si 0.25599(4) 0.34281(4) 0.15202(3) 0.04737(18) Uani 1 1 d . . .
Si4 Si 0.36929(4) 0.35592(3) 0.10031(3) 0.04177(16) Uani 1 1 d . . .
Si5 Si 0.20048(4) 0.15933(3) 0.02231(3) 0.04065(16) Uani 1 1 d . . .
Si6 Si 0.25002(4) 0.08648(3) 0.15450(3) 0.03830(15) Uani 1 1 d . . .
N1 N 0.84833(9) 0.43322(8) 0.09968(8) 0.0303(4) Uani 1 1 d . . .
N2 N 0.80143(9) 0.43781(8) 0.17234(9) 0.0309(4) Uani 1 1 d . . .
N3 N 0.79885(10) 0.13758(9) 0.08593(9) 0.0356(4) Uani 1 1 d . . .
N4 N 0.84403(10) 0.14436(8) 0.19475(9) 0.0342(4) Uani 1 1 d . . .
N5 N 0.43516(9) 0.18000(8) 0.19603(9) 0.0306(4) Uani 1 1 d . . .
N6 N 0.32088(10) 0.31061(9) 0.13240(9) 0.0344(4) Uani 1 1 d . . .
N7 N 0.25767(9) 0.14899(9) 0.10423(9) 0.0333(4) Uani 1 1 d . . .
C1 C 0.82384(11) 0.39347(10) 0.13715(10) 0.0299(4) Uani 1 1 d . . .
C2 C 0.84127(12) 0.49927(10) 0.11137(11) 0.0349(5) Uani 1 1 d . . .
H2 H 0.8546 0.5354 0.0909 0.042 Uiso 1 1 calc R . .
C3 C 0.81192(12) 0.50203(10) 0.15722(11) 0.0357(5) Uani 1 1 d . . .
H3 H 0.8005 0.5406 0.1758 0.043 Uiso 1 1 calc R . .
C4 C 0.87617(12) 0.40985(11) 0.05094(12) 0.0376(5) Uani 1 1 d . . .
C5 C 0.82959(14) 0.39319(11) -0.01493(12) 0.0432(6) Uani 1 1 d . . .
C6 C 0.85821(18) 0.37011(14) -0.06042(15) 0.0617(8) Uani 1 1 d . . .
H6 H 0.8284 0.3568 -0.1053 0.074 Uiso 1 1 calc R . .
C7 C 0.9283(2) 0.36633(18) -0.04157(19) 0.0800(11) Uani 1 1 d . . .
H7 H 0.9465 0.3508 -0.0736 0.096 Uiso 1 1 calc R . .
C8 C 0.97253(18) 0.38466(17) 0.0228(2) 0.0763(10) Uani 1 1 d . . .
H8 H 1.0210 0.3818 0.0347 0.092 Uiso 1 1 calc R . .
C9 C 0.94776(14) 0.40743(13) 0.07124(15) 0.0526(7) Uani 1 1 d . . .
C10 C 0.75242(14) 0.40036(12) -0.03683(12) 0.0478(6) Uani 1 1 d . . .
H10 H 0.7442 0.4324 -0.0049 0.057 Uiso 1 1 calc R . .
C11 C 0.7173(2) 0.42772(17) -0.10982(16) 0.0792(10) Uani 1 1 d . . .
H11A H 0.7417 0.4673 -0.1144 0.119 Uiso 1 1 calc R . .
H11B H 0.6691 0.4387 -0.1188 0.119 Uiso 1 1 calc R . .
H11C H 0.7187 0.3947 -0.1430 0.119 Uiso 1 1 calc R . .
C12 C 0.71893(16) 0.33569(15) -0.03063(16) 0.0662(8) Uani 1 1 d . . .
H12A H 0.7275 0.3028 -0.0602 0.099 Uiso 1 1 calc R . .
H12B H 0.6690 0.3420 -0.0449 0.099 Uiso 1 1 calc R . .
H12C H 0.7388 0.3207 0.0171 0.099 Uiso 1 1 calc R . .
C13 C 0.99697(14) 0.42752(16) 0.14262(17) 0.0634(8) Uani 1 1 d . . .
H13 H 0.9697 0.4526 0.1642 0.076 Uiso 1 1 calc R . .
C14 C 1.0540(2) 0.4728(2) 0.1400(3) 0.1061(17) Uani 1 1 d . . .
H14A H 1.0821 0.4883 0.1864 0.159 Uiso 1 1 calc R . .
H14B H 1.0330 0.5104 0.1103 0.159 Uiso 1 1 calc R . .
H14C H 1.0833 0.4487 0.1215 0.159 Uiso 1 1 calc R . .
C15 C 1.0260(2) 0.3676(2) 0.1860(3) 0.1230(18) Uani 1 1 d . . .
H15A H 0.9881 0.3420 0.1898 0.184 Uiso 1 1 calc R . .
H15B H 1.0579 0.3811 0.2319 0.184 Uiso 1 1 calc R . .
H15C H 1.0508 0.3407 0.1645 0.184 Uiso 1 1 calc R . .
C16 C 0.76577(13) 0.42203(10) 0.21707(12) 0.0367(5) Uani 1 1 d . . .
C17 C 0.80519(15) 0.41501(11) 0.28742(12) 0.0452(6) Uani 1 1 d . . .
C18 C 0.76881(19) 0.40019(13) 0.32860(15) 0.0615(8) Uani 1 1 d . . .
H18 H 0.7935 0.3944 0.3766 0.074 Uiso 1 1 calc R . .
C19 C 0.6981(2) 0.39387(14) 0.30126(18) 0.0671(9) Uani 1 1 d . . .
H19 H 0.6748 0.3828 0.3304 0.081 Uiso 1 1 calc R . .
C20 C 0.66065(17) 0.40321(13) 0.23271(17) 0.0587(8) Uani 1 1 d . . .
H20 H 0.6117 0.3995 0.2150 0.070 Uiso 1 1 calc R . .
C21 C 0.69379(14) 0.41826(11) 0.18811(14) 0.0453(6) Uani 1 1 d . . .
C22 C 0.88335(15) 0.42347(12) 0.31697(12) 0.0514(7) Uani 1 1 d . . .
H22 H 0.8949 0.4530 0.2851 0.062 Uiso 1 1 calc R . .
C23 C 0.9200(2) 0.35932(18) 0.3197(3) 0.1194(19) Uani 1 1 d . . .
H23A H 0.9138 0.3307 0.3542 0.179 Uiso 1 1 calc R . .
H23B H 0.9694 0.3675 0.3322 0.179 Uiso 1 1 calc R . .
H23C H 0.9005 0.3380 0.2747 0.179 Uiso 1 1 calc R . .
C24 C 0.9091(2) 0.4570(2) 0.38681(16) 0.1037(16) Uani 1 1 d . . .
H24A H 0.8813 0.4963 0.3842 0.156 Uiso 1 1 calc R . .
H24B H 0.9577 0.4694 0.4002 0.156 Uiso 1 1 calc R . .
H24C H 0.9048 0.4267 0.4210 0.156 Uiso 1 1 calc R . .
C25 C 0.65146(14) 0.43081(14) 0.11317(15) 0.0550(7) Uani 1 1 d . . .
H25 H 0.6843 0.4393 0.0902 0.066 Uiso 1 1 calc R . .
C26 C 0.6060(2) 0.4917(2) 0.1033(2) 0.0928(12) Uani 1 1 d . . .
H26A H 0.5763 0.4865 0.1291 0.139 Uiso 1 1 calc R . .
H26B H 0.5771 0.4972 0.0545 0.139 Uiso 1 1 calc R . .
H26C H 0.6354 0.5305 0.1201 0.139 Uiso 1 1 calc R . .
C27 C 0.6082(2) 0.3709(2) 0.0792(2) 0.1026(14) Uani 1 1 d . . .
H27A H 0.6390 0.3345 0.0795 0.154 Uiso 1 1 calc R . .
H27B H 0.5783 0.3815 0.0316 0.154 Uiso 1 1 calc R . .
H27C H 0.5797 0.3581 0.1044 0.154 Uiso 1 1 calc R . .
C28 C 0.82612(11) 0.18255(10) 0.13715(11) 0.0324(4) Uani 1 1 d . . .
C29 C 0.79995(14) 0.07470(11) 0.11070(12) 0.0435(6) Uani 1 1 d . . .
H29 H 0.7838 0.0361 0.0841 0.052 Uiso 1 1 calc R . .
C30 C 0.82813(13) 0.07863(11) 0.17928(12) 0.0426(6) Uani 1 1 d . . .
H30 H 0.8357 0.0435 0.2110 0.051 Uiso 1 1 calc R . .
C31 C 0.77389(13) 0.15232(11) 0.01333(11) 0.0393(5) Uani 1 1 d . . .
C32 C 0.70300(13) 0.15668(11) -0.02365(11) 0.0407(5) Uani 1 1 d . . .
C33 C 0.68094(17) 0.17015(13) -0.09405(12) 0.0543(7) Uani 1 1 d . . .
H33 H 0.6328 0.1732 -0.1214 0.065 Uiso 1 1 calc R . .
C34 C 0.7273(2) 0.17897(15) -0.12377(14) 0.0674(9) Uani 1 1 d . . .
H34 H 0.7111 0.1891 -0.1713 0.081 Uiso 1 1 calc R . .
C35 C 0.7970(2) 0.17353(15) -0.08643(16) 0.0675(9) Uani 1 1 d . . .
H35 H 0.8283 0.1802 -0.1085 0.081 Uiso 1 1 calc R . .
C36 C 0.82305(16) 0.15824(13) -0.01633(14) 0.0532(7) Uani 1 1 d . . .
C37 C 0.65076(13) 0.14422(12) 0.00829(12) 0.0440(6) Uani 1 1 d . . .
H37 H 0.6760 0.1437 0.0593 0.053 Uiso 1 1 calc R . .
C38 C 0.61732(17) 0.07662(14) -0.01409(17) 0.0648(8) Uani 1 1 d . . .
H38A H 0.5931 0.0757 -0.0641 0.097 Uiso 1 1 calc R . .
H38B H 0.5843 0.0683 0.0074 0.097 Uiso 1 1 calc R . .
H38C H 0.6533 0.0427 0.0002 0.097 Uiso 1 1 calc R . .
C39 C 0.59516(16) 0.19685(15) -0.00962(16) 0.0612(7) Uani 1 1 d . . .
H39A H 0.6170 0.2398 0.0046 0.092 Uiso 1 1 calc R . .
H39B H 0.5644 0.1877 0.0143 0.092 Uiso 1 1 calc R . .
H39C H 0.5683 0.1969 -0.0593 0.092 Uiso 1 1 calc R . .
C40 C 0.89899(17) 0.14779(16) 0.02396(18) 0.0671(8) Uani 1 1 d . . .
H40 H 0.9044 0.1280 0.0690 0.080 Uiso 1 1 calc R . .
C41 C 0.9304(2) 0.09950(19) -0.0121(3) 0.0970(13) Uani 1 1 d . . .
H41A H 0.9018 0.0598 -0.0251 0.145 Uiso 1 1 calc R . .
H41B H 0.9774 0.0878 0.0192 0.145 Uiso 1 1 calc R . .
H41C H 0.9320 0.1202 -0.0533 0.145 Uiso 1 1 calc R . .
C42 C 0.9392(2) 0.21177(19) 0.0389(2) 0.0927(13) Uani 1 1 d . . .
H42A H 0.9345 0.2327 -0.0044 0.139 Uiso 1 1 calc R . .
H42B H 0.9882 0.2028 0.0661 0.139 Uiso 1 1 calc R . .
H42C H 0.9210 0.2411 0.0646 0.139 Uiso 1 1 calc R . .
C43 C 0.88078(12) 0.16656(10) 0.26432(11) 0.0358(5) Uani 1 1 d . . .
C44 C 0.84272(12) 0.17972(10) 0.30457(11) 0.0373(5) Uani 1 1 d . . .
C45 C 0.88039(14) 0.19485(12) 0.37339(12) 0.0473(6) Uani 1 1 d . . .
H45 H 0.8564 0.2037 0.4024 0.057 Uiso 1 1 calc R . .
C46 C 0.95159(15) 0.19724(14) 0.40017(13) 0.0532(7) Uani 1 1 d . . .
H46 H 0.9760 0.2075 0.4473 0.064 Uiso 1 1 calc R . .
C47 C 0.98784(14) 0.18486(13) 0.35912(14) 0.0529(7) Uani 1 1 d . . .
H47 H 1.0369 0.1871 0.3782 0.063 Uiso 1 1 calc R . .
C48 C 0.95308(13) 0.16914(12) 0.28978(13) 0.0444(6) Uani 1 1 d . . .
C49 C 0.76378(12) 0.17761(11) 0.27457(11) 0.0386(5) Uani 1 1 d . . .
H49 H 0.7489 0.1375 0.2452 0.046 Uiso 1 1 calc R . .
C50 C 0.73340(13) 0.23736(12) 0.22899(14) 0.0469(6) Uani 1 1 d . . .
H50A H 0.7521 0.2775 0.2551 0.070 Uiso 1 1 calc R . .
H50B H 0.6829 0.2371 0.2139 0.070 Uiso 1 1 calc R . .
H50C H 0.7457 0.2357 0.1888 0.070 Uiso 1 1 calc R . .
C51 C 0.73370(15) 0.17340(14) 0.32980(14) 0.0536(7) Uani 1 1 d . . .
H51A H 0.7574 0.1387 0.3626 0.080 Uiso 1 1 calc R . .
H51B H 0.6842 0.1634 0.3082 0.080 Uiso 1 1 calc R . .
H51C H 0.7403 0.2155 0.3540 0.080 Uiso 1 1 calc R . .
C52 C 0.99375(14) 0.15311(15) 0.24591(15) 0.0574(7) Uani 1 1 d . . .
H52 H 0.9627 0.1612 0.1969 0.069 Uiso 1 1 calc R . .
C53 C 1.05752(16) 0.19591(17) 0.26212(19) 0.0715(9) Uani 1 1 d . . .
H53A H 1.0447 0.2421 0.2623 0.107 Uiso 1 1 calc R . .
H53B H 1.0768 0.1891 0.2272 0.107 Uiso 1 1 calc R . .
H53C H 1.0922 0.1841 0.3073 0.107 Uiso 1 1 calc R . .
C54 C 1.0140(2) 0.08030(18) 0.2527(3) 0.0955(13) Uani 1 1 d . . .
H54A H 1.0395 0.0707 0.2236 0.143 Uiso 1 1 calc R . .
H54B H 0.9721 0.0532 0.2383 0.143 Uiso 1 1 calc R . .
H54C H 1.0433 0.0705 0.3007 0.143 Uiso 1 1 calc R . .
C55 C 0.42576(13) 0.25691(13) 0.31066(12) 0.0430(5) Uani 1 1 d . . .
H55A H 0.4022 0.2934 0.2805 0.064 Uiso 1 1 calc R . .
H55B H 0.4541 0.2739 0.3564 0.064 Uiso 1 1 calc R . .
H55C H 0.3913 0.2262 0.3141 0.064 Uiso 1 1 calc R . .
C56 C 0.54857(13) 0.27521(13) 0.27295(13) 0.0478(6) Uani 1 1 d . . .
H56A H 0.5836 0.2536 0.2602 0.072 Uiso 1 1 calc R . .
H56B H 0.5708 0.2949 0.3186 0.072 Uiso 1 1 calc R . .
H56C H 0.5256 0.3096 0.2394 0.072 Uiso 1 1 calc R . .
C57 C 0.53431(13) 0.15054(13) 0.33990(12) 0.0453(6) Uani 1 1 d . . .
H57A H 0.5032 0.1162 0.3436 0.068 Uiso 1 1 calc R . .
H57B H 0.5572 0.1720 0.3845 0.068 Uiso 1 1 calc R . .
H57C H 0.5693 0.1309 0.3257 0.068 Uiso 1 1 calc R . .
C58 C 0.55449(15) 0.14092(16) 0.15946(16) 0.0616(8) Uani 1 1 d . . .
H58A H 0.5533 0.1841 0.1386 0.092 Uiso 1 1 calc R . .
H58B H 0.5675 0.1075 0.1333 0.092 Uiso 1 1 calc R . .
H58C H 0.5885 0.1414 0.2070 0.092 Uiso 1 1 calc R . .
C59 C 0.40913(14) 0.10960(12) 0.06589(12) 0.0461(6) Uani 1 1 d . . .
H59A H 0.3616 0.1011 0.0616 0.069 Uiso 1 1 calc R . .
H59B H 0.4258 0.0723 0.0474 0.069 Uiso 1 1 calc R . .
H59C H 0.4100 0.1493 0.0401 0.069 Uiso 1 1 calc R . .
C60 C 0.47488(15) 0.03834(12) 0.20007(14) 0.0537(7) Uani 1 1 d . . .
H60A H 0.5146 0.0385 0.2442 0.081 Uiso 1 1 calc R . .
H60B H 0.4818 0.0049 0.1700 0.081 Uiso 1 1 calc R . .
H60C H 0.4327 0.0284 0.2076 0.081 Uiso 1 1 calc R . .
C61 C 0.18248(18) 0.3760(2) 0.07412(17) 0.0815(11) Uani 1 1 d . . .
H61A H 0.1941 0.4202 0.0638 0.122 Uiso 1 1 calc R . .
H61B H 0.1402 0.3777 0.0834 0.122 Uiso 1 1 calc R . .
H61C H 0.1750 0.3472 0.0347 0.122 Uiso 1 1 calc R . .
C62 C 0.2839(2) 0.41162(14) 0.21643(16) 0.0721(9) Uani 1 1 d . . .
H62A H 0.3183 0.3952 0.2599 0.108 Uiso 1 1 calc R . .
H62B H 0.2437 0.4285 0.2240 0.108 Uiso 1 1 calc R . .
H62C H 0.3044 0.4469 0.1990 0.108 Uiso 1 1 calc R . .
C63 C 0.21850(15) 0.27998(15) 0.19204(15) 0.0577(7) Uani 1 1 d . . .
H63A H 0.2018 0.2425 0.1609 0.087 Uiso 1 1 calc R . .
H63B H 0.1799 0.2993 0.2008 0.087 Uiso 1 1 calc R . .
H63C H 0.2542 0.2651 0.2355 0.087 Uiso 1 1 calc R . .
C64 C 0.31671(18) 0.40652(15) 0.02254(16) 0.0690(9) Uani 1 1 d . . .
H64A H 0.2821 0.3785 -0.0113 0.103 Uiso 1 1 calc R . .
H64B H 0.3474 0.4252 0.0022 0.103 Uiso 1 1 calc R . .
H64C H 0.2934 0.4420 0.0364 0.103 Uiso 1 1 calc R . .
C65 C 0.42871(17) 0.41636(14) 0.16258(17) 0.0677(8) Uani 1 1 d . . .
H65A H 0.4013 0.4512 0.1718 0.102 Uiso 1 1 calc R . .
H65B H 0.4597 0.4356 0.1429 0.102 Uiso 1 1 calc R . .
H65C H 0.4562 0.3939 0.2055 0.102 Uiso 1 1 calc R . .
C66 C 0.42439(14) 0.30211(13) 0.07041(14) 0.0492(6) Uani 1 1 d . . .
H66A H 0.4558 0.2764 0.1092 0.074 Uiso 1 1 calc R . .
H66B H 0.4515 0.3294 0.0518 0.074 Uiso 1 1 calc R . .
H66C H 0.3948 0.2724 0.0346 0.074 Uiso 1 1 calc R . .
C67 C 0.23558(14) 0.21514(13) -0.02706(12) 0.0467(6) Uani 1 1 d . . .
H67A H 0.2465 0.2580 -0.0043 0.070 Uiso 1 1 calc R . .
H67B H 0.2009 0.2207 -0.0738 0.070 Uiso 1 1 calc R . .
H67C H 0.2777 0.1959 -0.0289 0.070 Uiso 1 1 calc R . .
C68 C 0.11459(15) 0.19563(19) 0.01344(16) 0.0708(9) Uani 1 1 d . . .
H68A H 0.0920 0.1665 0.0352 0.106 Uiso 1 1 calc R . .
H68B H 0.0851 0.2006 -0.0353 0.106 Uiso 1 1 calc R . .
H68C H 0.1222 0.2387 0.0358 0.106 Uiso 1 1 calc R . .
C69 C 0.1795(2) 0.08017(16) -0.02745(15) 0.0760(11) Uani 1 1 d . . .
H69A H 0.2216 0.0624 -0.0306 0.114 Uiso 1 1 calc R . .
H69B H 0.1449 0.0884 -0.0737 0.114 Uiso 1 1 calc R . .
H69C H 0.1612 0.0485 -0.0039 0.114 Uiso 1 1 calc R . .
C70 C 0.15940(15) 0.07537(16) 0.15042(16) 0.0604(7) Uani 1 1 d . . .
H70A H 0.1439 0.1161 0.1647 0.091 Uiso 1 1 calc R . .
H70B H 0.1587 0.0396 0.1812 0.091 Uiso 1 1 calc R . .
H70C H 0.1284 0.0647 0.1033 0.091 Uiso 1 1 calc R . .
C71 C 0.30498(14) 0.10226(13) 0.24718(12) 0.0471(6) Uani 1 1 d . . .
H71A H 0.3533 0.1076 0.2528 0.071 Uiso 1 1 calc R . .
H71B H 0.3012 0.0651 0.2749 0.071 Uiso 1 1 calc R . .
H71C H 0.2891 0.1423 0.2622 0.071 Uiso 1 1 calc R . .
C72 C 0.27646(17) 0.00426(13) 0.13323(16) 0.0579(7) Uani 1 1 d . . .
H72A H 0.2419 -0.0111 0.0893 0.087 Uiso 1 1 calc R . .
H72B H 0.2797 -0.0271 0.1695 0.087 Uiso 1 1 calc R . .
H72C H 0.3216 0.0080 0.1297 0.087 Uiso 1 1 calc R . .
 
loop_
 _atom_site_aniso_label
 _atom_site_aniso_U_11
 _atom_site_aniso_U_22
 _atom_site_aniso_U_33
 _atom_site_aniso_U_23
 _atom_site_aniso_U_13
 _atom_site_aniso_U_12
Mg 0.0299(4) 0.0304(3) 0.0288(3) -0.0026(3) 0.0140(3) 0.0007(3)
Li 0.047(2) 0.0298(18) 0.052(2) -0.0013(16) 0.0163(19) -0.0015(17)
Si1 0.0316(3) 0.0378(3) 0.0304(3) 0.0009(2) 0.0132(3) 0.0024(2)
Si2 0.0361(3) 0.0394(3) 0.0388(3) -0.0028(3) 0.0203(3) 0.0054(3)
Si3 0.0560(4) 0.0505(4) 0.0390(4) -0.0031(3) 0.0220(3) 0.0213(3)
Si4 0.0490(4) 0.0311(3) 0.0421(4) 0.0020(3) 0.0143(3) -0.0015(3)
Si5 0.0430(4) 0.0492(4) 0.0303(3) -0.0051(3) 0.0149(3) -0.0139(3)
Si6 0.0423(4) 0.0400(3) 0.0394(3) -0.0001(3) 0.0232(3) -0.0063(3)
N1 0.0283(9) 0.0333(9) 0.0307(9) -0.0010(7) 0.0131(8) -0.0055(7)
N2 0.0345(10) 0.0291(8) 0.0318(9) -0.0006(7) 0.0159(8) -0.0041(7)
N3 0.0412(11) 0.0340(9) 0.0316(9) -0.0034(7) 0.0141(8) -0.0025(8)
N4 0.0384(11) 0.0295(9) 0.0314(9) -0.0019(7) 0.0099(8) 0.0039(8)
N5 0.0297(9) 0.0346(9) 0.0304(9) -0.0001(7) 0.0148(8) 0.0022(7)
N6 0.0396(11) 0.0322(9) 0.0312(9) -0.0041(7) 0.0135(8) 0.0049(8)
N7 0.0346(10) 0.0371(9) 0.0322(9) -0.0046(7) 0.0174(8) -0.0067(8)
C1 0.0267(11) 0.0338(10) 0.0284(10) -0.0006(8) 0.0099(9) -0.0051(8)
C2 0.0370(12) 0.0312(10) 0.0358(11) 0.0020(9) 0.0134(10) -0.0069(9)
C3 0.0391(13) 0.0293(10) 0.0393(12) -0.0027(9) 0.0159(10) -0.0032(9)
C4 0.0444(14) 0.0360(11) 0.0407(12) -0.0043(9) 0.0256(11) -0.0098(10)
C5 0.0602(16) 0.0381(12) 0.0375(12) -0.0018(9) 0.0257(12) -0.0133(11)
C6 0.089(2) 0.0627(17) 0.0471(15) -0.0137(13) 0.0412(16) -0.0203(16)
C7 0.102(3) 0.085(2) 0.088(2) -0.0354(19) 0.075(2) -0.034(2)
C8 0.066(2) 0.085(2) 0.105(3) -0.037(2) 0.064(2) -0.0238(18)
C9 0.0469(15) 0.0539(15) 0.0696(18) -0.0175(13) 0.0364(14) -0.0142(12)
C10 0.0578(17) 0.0432(13) 0.0349(12) -0.0037(10) 0.0098(12) -0.0067(12)
C11 0.096(3) 0.0633(19) 0.0529(18) 0.0128(15) 0.0018(17) -0.0033(18)
C12 0.0547(18) 0.0640(18) 0.0662(19) 0.0117(15) 0.0086(15) -0.0167(14)
C13 0.0348(15) 0.0705(19) 0.082(2) -0.0286(16) 0.0201(15) -0.0067(13)
C14 0.071(2) 0.113(3) 0.160(4) -0.088(3) 0.072(3) -0.047(2)
C15 0.094(3) 0.104(3) 0.111(3) -0.016(3) -0.026(3) 0.004(3)
C16 0.0498(14) 0.0292(10) 0.0419(12) -0.0045(9) 0.0296(11) -0.0065(9)
C17 0.0725(18) 0.0305(11) 0.0399(13) -0.0044(9) 0.0297(13) -0.0098(11)
C18 0.104(3) 0.0476(15) 0.0509(16) -0.0076(12) 0.0496(17) -0.0187(16)
C19 0.108(3) 0.0492(16) 0.079(2) -0.0096(14) 0.075(2) -0.0170(17)
C20 0.0670(19) 0.0471(15) 0.087(2) -0.0104(14) 0.0570(18) -0.0112(13)
C21 0.0514(16) 0.0366(12) 0.0607(16) -0.0081(11) 0.0356(13) -0.0082(11)
C22 0.0707(19) 0.0430(13) 0.0330(12) 0.0014(10) 0.0118(12) -0.0106(12)
C23 0.078(3) 0.058(2) 0.156(4) -0.009(2) -0.027(3) 0.0047(19)
C24 0.139(4) 0.132(3) 0.0478(18) -0.033(2) 0.045(2) -0.086(3)
C25 0.0406(15) 0.0651(17) 0.0647(17) -0.0032(14) 0.0262(14) -0.0085(13)
C26 0.082(3) 0.103(3) 0.106(3) 0.030(2) 0.050(2) 0.027(2)
C27 0.088(3) 0.102(3) 0.091(3) -0.015(2) 0.006(2) -0.039(2)
C28 0.0313(12) 0.0343(11) 0.0312(11) -0.0028(8) 0.0117(9) -0.0008(9)
C29 0.0549(16) 0.0295(11) 0.0436(13) -0.0071(9) 0.0164(12) -0.0023(10)
C30 0.0531(15) 0.0288(11) 0.0421(13) 0.0014(9) 0.0141(11) 0.0049(10)
C31 0.0536(15) 0.0364(11) 0.0306(11) -0.0072(9) 0.0191(11) -0.0106(10)
C32 0.0574(16) 0.0345(11) 0.0297(11) -0.0039(9) 0.0163(11) -0.0116(10)
C33 0.078(2) 0.0478(14) 0.0306(12) -0.0008(10) 0.0138(13) -0.0152(13)
C34 0.111(3) 0.0604(18) 0.0360(14) -0.0035(12) 0.0347(17) -0.0231(18)
C35 0.107(3) 0.0624(18) 0.0556(18) -0.0130(14) 0.056(2) -0.0279(18)
C36 0.0695(19) 0.0494(15) 0.0540(15) -0.0130(12) 0.0387(14) -0.0176(13)
C37 0.0483(15) 0.0447(13) 0.0351(12) 0.0038(10) 0.0117(11) -0.0050(11)
C38 0.074(2) 0.0533(16) 0.0697(19) -0.0008(14) 0.0305(17) -0.0233(15)
C39 0.0586(18) 0.0587(17) 0.0647(18) 0.0085(14) 0.0223(15) 0.0017(14)
C40 0.065(2) 0.072(2) 0.081(2) -0.0146(16) 0.0479(18) -0.0125(16)
C41 0.088(3) 0.079(2) 0.149(4) -0.037(2) 0.073(3) -0.016(2)
C42 0.076(2) 0.082(2) 0.132(3) -0.044(2) 0.053(2) -0.027(2)
C43 0.0390(13) 0.0296(10) 0.0307(11) 0.0011(8) 0.0047(9) 0.0034(9)
C44 0.0453(14) 0.0294(10) 0.0347(11) 0.0009(9) 0.0126(10) -0.0029(9)
C45 0.0573(17) 0.0484(14) 0.0335(12) -0.0025(10) 0.0147(12) -0.0094(12)
C46 0.0546(17) 0.0585(16) 0.0330(12) 0.0004(11) 0.0023(12) -0.0068(13)
C47 0.0409(15) 0.0540(15) 0.0466(14) 0.0049(12) -0.0017(12) 0.0038(12)
C48 0.0422(14) 0.0392(12) 0.0440(13) 0.0031(10) 0.0083(11) 0.0095(10)
C49 0.0448(14) 0.0355(11) 0.0349(11) -0.0065(9) 0.0147(10) -0.0073(10)
C50 0.0402(14) 0.0473(14) 0.0563(15) 0.0056(11) 0.0223(12) -0.0002(11)
C51 0.0603(17) 0.0565(16) 0.0516(15) -0.0071(12) 0.0299(14) -0.0162(13)
C52 0.0401(15) 0.0674(18) 0.0587(17) -0.0022(14) 0.0127(13) 0.0179(13)
C53 0.0526(19) 0.082(2) 0.083(2) 0.0011(18) 0.0298(17) 0.0086(16)
C54 0.072(2) 0.071(2) 0.148(4) -0.024(2) 0.048(3) 0.0155(19)
C55 0.0446(14) 0.0514(14) 0.0336(12) -0.0060(10) 0.0160(11) 0.0031(11)
C56 0.0429(14) 0.0503(14) 0.0479(14) -0.0033(11) 0.0152(12) -0.0078(11)
C57 0.0433(14) 0.0527(14) 0.0373(12) 0.0078(10) 0.0127(11) 0.0073(11)
C58 0.0469(16) 0.082(2) 0.0682(19) -0.0187(16) 0.0364(15) -0.0006(14)
C59 0.0577(16) 0.0458(13) 0.0396(13) -0.0080(10) 0.0241(12) 0.0030(12)
C60 0.0597(17) 0.0433(14) 0.0581(16) 0.0028(12) 0.0228(14) 0.0185(12)
C61 0.069(2) 0.116(3) 0.0621(19) 0.0111(19) 0.0282(17) 0.052(2)
C62 0.119(3) 0.0480(16) 0.0604(18) -0.0088(13) 0.0471(19) 0.0179(17)
C63 0.0565(17) 0.0742(19) 0.0552(16) -0.0117(14) 0.0358(14) 0.0111(14)
C64 0.082(2) 0.0525(16) 0.0635(19) 0.0222(14) 0.0183(17) 0.0026(15)
C65 0.067(2) 0.0439(15) 0.081(2) -0.0116(14) 0.0168(17) -0.0114(14)
C66 0.0541(16) 0.0519(14) 0.0503(14) 0.0037(11) 0.0298(13) -0.0078(12)
C67 0.0544(16) 0.0513(14) 0.0322(12) 0.0000(10) 0.0145(11) -0.0120(12)
C68 0.0406(16) 0.110(3) 0.0525(17) 0.0124(17) 0.0078(13) -0.0019(16)
C69 0.117(3) 0.0684(19) 0.0437(15) -0.0172(14) 0.0319(17) -0.050(2)
C70 0.0542(17) 0.0734(19) 0.0645(18) 0.0056(15) 0.0350(15) -0.0145(14)
C71 0.0589(17) 0.0488(14) 0.0389(13) 0.0087(10) 0.0246(12) -0.0002(12)
C72 0.077(2) 0.0410(14) 0.0649(18) -0.0021(12) 0.0375(16) -0.0081(13)
 
_geom_special_details
;
 All esds (except the esd in the dihedral angle between two l.s. planes)
 are estimated using the full covariance matrix.  The cell esds are taken
 into account individually in the estimation of esds in distances, angles
 and torsion angles; correlations between esds in cell parameters are only
 used when they are defined by crystal symmetry.  An approximate (isotropic)
 treatment of cell esds is used for estimating esds involving l.s. planes.
;
 
loop_
 _geom_bond_atom_site_label_1
 _geom_bond_atom_site_label_2
 _geom_bond_distance
 _geom_bond_site_symmetry_2
 _geom_bond_publ_flag
Mg N6 2.0222(19) . ?
Mg N5 2.0257(19) . ?
Mg N7 2.0262(19) . ?
Mg Si3 3.1886(9) . ?
Mg Si2 3.2015(9) . ?
Mg Si1 3.2113(9) . ?
Mg Si4 3.2117(9) . ?
Mg Si6 3.2140(9) . ?
Mg Si5 3.2161(9) . ?
Li C1 2.150(4) . ?
Li C28 2.154(4) . ?
Si1 N5 1.7021(18) . ?
Si1 C56 1.880(3) . ?
Si1 C55 1.881(2) . ?
Si1 C57 1.887(2) . ?
Si2 N5 1.6986(18) . ?
Si2 C59 1.872(2) . ?
Si2 C60 1.881(3) . ?
Si2 C58 1.886(3) . ?
Si3 N6 1.7008(19) . ?
Si3 C63 1.868(3) . ?
Si3 C62 1.883(3) . ?
Si3 C61 1.890(3) . ?
Si4 N6 1.696(2) . ?
Si4 C66 1.872(3) . ?
Si4 C65 1.878(3) . ?
Si4 C64 1.890(3) . ?
Si5 N7 1.6935(19) . ?
Si5 C67 1.877(2) . ?
Si5 C69 1.882(3) . ?
Si5 C68 1.888(3) . ?
Si6 N7 1.7060(18) . ?
Si6 C72 1.874(3) . ?
Si6 C71 1.875(3) . ?
Si6 C70 1.882(3) . ?
N1 C1 1.365(3) . ?
N1 C2 1.387(3) . ?
N1 C4 1.448(3) . ?
N2 C1 1.365(3) . ?
N2 C3 1.385(3) . ?
N2 C16 1.451(3) . ?
N3 C28 1.363(3) . ?
N3 C29 1.381(3) . ?
N3 C31 1.447(3) . ?
N4 C28 1.369(3) . ?
N4 C30 1.389(3) . ?
N4 C43 1.442(3) . ?
C2 C3 1.336(3) . ?
C2 H2 0.9500 . ?
C3 H3 0.9500 . ?
C4 C9 1.393(4) . ?
C4 C5 1.397(3) . ?
C5 C6 1.398(4) . ?
C5 C10 1.508(4) . ?
C6 C7 1.368(5) . ?
C6 H6 0.9500 . ?
C7 C8 1.367(5) . ?
C7 H7 0.9500 . ?
C8 C9 1.396(4) . ?
C8 H8 0.9500 . ?
C9 C13 1.516(4) . ?
C10 C12 1.523(4) . ?
C10 C11 1.533(4) . ?
C10 H10 1.0000 . ?
C11 H11A 0.9800 . ?
C11 H11B 0.9800 . ?
C11 H11C 0.9800 . ?
C12 H12A 0.9800 . ?
C12 H12B 0.9800 . ?
C12 H12C 0.9800 . ?
C13 C15 1.506(6) . ?
C13 C14 1.528(5) . ?
C13 H13 1.0000 . ?
C14 H14A 0.9800 . ?
C14 H14B 0.9800 . ?
C14 H14C 0.9800 . ?
C15 H15A 0.9800 . ?
C15 H15B 0.9800 . ?
C15 H15C 0.9800 . ?
C16 C21 1.393(4) . ?
C16 C17 1.400(3) . ?
C17 C18 1.395(4) . ?
C17 C22 1.520(4) . ?
C18 C19 1.372(5) . ?
C18 H18 0.9500 . ?
C19 C20 1.367(5) . ?
C19 H19 0.9500 . ?
C20 C21 1.405(3) . ?
C20 H20 0.9500 . ?
C21 C25 1.507(4) . ?
C22 C23 1.506(5) . ?
C22 C24 1.522(4) . ?
C22 H22 1.0000 . ?
C23 H23A 0.9800 . ?
C23 H23B 0.9800 . ?
C23 H23C 0.9800 . ?
C24 H24A 0.9800 . ?
C24 H24B 0.9800 . ?
C24 H24C 0.9800 . ?
C25 C27 1.525(4) . ?
C25 C26 1.530(5) . ?
C25 H25 1.0000 . ?
C26 H26A 0.9800 . ?
C26 H26B 0.9800 . ?
C26 H26C 0.9800 . ?
C27 H27A 0.9800 . ?
C27 H27B 0.9800 . ?
C27 H27C 0.9800 . ?
C29 C30 1.338(3) . ?
C29 H29 0.9500 . ?
C30 H30 0.9500 . ?
C31 C32 1.388(4) . ?
C31 C36 1.404(3) . ?
C32 C33 1.403(3) . ?
C32 C37 1.515(3) . ?
C33 C34 1.359(4) . ?
C33 H33 0.9500 . ?
C34 C35 1.369(5) . ?
C34 H34 0.9500 . ?
C35 C36 1.401(4) . ?
C35 H35 0.9500 . ?
C36 C40 1.501(4) . ?
C37 C39 1.520(4) . ?
C37 C38 1.535(4) . ?
C37 H37 1.0000 . ?
C38 H38A 0.9800 . ?
C38 H38B 0.9800 . ?
C38 H38C 0.9800 . ?
C39 H39A 0.9800 . ?
C39 H39B 0.9800 . ?
C39 H39C 0.9800 . ?
C40 C42 1.518(4) . ?
C40 C41 1.540(4) . ?
C40 H40 1.0000 . ?
C41 H41A 0.9800 . ?
C41 H41B 0.9800 . ?
C41 H41C 0.9800 . ?
C42 H42A 0.9800 . ?
C42 H42B 0.9800 . ?
C42 H42C 0.9800 . ?
C43 C48 1.399(3) . ?
C43 C44 1.400(3) . ?
C44 C45 1.394(3) . ?
C44 C49 1.526(3) . ?
C45 C46 1.377(4) . ?
C45 H45 0.9500 . ?
C46 C47 1.381(4) . ?
C46 H46 0.9500 . ?
C47 C48 1.397(4) . ?
C47 H47 0.9500 . ?
C48 C52 1.519(4) . ?
C49 C50 1.530(3) . ?
C49 C51 1.530(3) . ?
C49 H49 1.0000 . ?
C50 H50A 0.9800 . ?
C50 H50B 0.9800 . ?
C50 H50C 0.9800 . ?
C51 H51A 0.9800 . ?
C51 H51B 0.9800 . ?
C51 H51C 0.9800 . ?
C52 C53 1.520(4) . ?
C52 C54 1.535(4) . ?
C52 H52 1.0000 . ?
C53 H53A 0.9800 . ?
C53 H53B 0.9800 . ?
C53 H53C 0.9800 . ?
C54 H54A 0.9800 . ?
C54 H54B 0.9800 . ?
C54 H54C 0.9800 . ?
C55 H55A 0.9800 . ?
C55 H55B 0.9800 . ?
C55 H55C 0.9800 . ?
C56 H56A 0.9800 . ?
C56 H56B 0.9800 . ?
C56 H56C 0.9800 . ?
C57 H57A 0.9800 . ?
C57 H57B 0.9800 . ?
C57 H57C 0.9800 . ?
C58 H58A 0.9800 . ?
C58 H58B 0.9800 . ?
C58 H58C 0.9800 . ?
C59 H59A 0.9800 . ?
C59 H59B 0.9800 . ?
C59 H59C 0.9800 . ?
C60 H60A 0.9800 . ?
C60 H60B 0.9800 . ?
C60 H60C 0.9800 . ?
C61 H61A 0.9800 . ?
C61 H61B 0.9800 . ?
C61 H61C 0.9800 . ?
C62 H62A 0.9800 . ?
C62 H62B 0.9800 . ?
C62 H62C 0.9800 . ?
C63 H63A 0.9800 . ?
C63 H63B 0.9800 . ?
C63 H63C 0.9800 . ?
C64 H64A 0.9800 . ?
C64 H64B 0.9800 . ?
C64 H64C 0.9800 . ?
C65 H65A 0.9800 . ?
C65 H65B 0.9800 . ?
C65 H65C 0.9800 . ?
C66 H66A 0.9800 . ?
C66 H66B 0.9800 . ?
C66 H66C 0.9800 . ?
C67 H67A 0.9800 . ?
C67 H67B 0.9800 . ?
C67 H67C 0.9800 . ?
C68 H68A 0.9800 . ?
C68 H68B 0.9800 . ?
C68 H68C 0.9800 . ?
C69 H69A 0.9800 . ?
C69 H69B 0.9800 . ?
C69 H69C 0.9800 . ?
C70 H70A 0.9800 . ?
C70 H70B 0.9800 . ?
C70 H70C 0.9800 . ?
C71 H71A 0.9800 . ?
C71 H71B 0.9800 . ?
C71 H71C 0.9800 . ?
C72 H72A 0.9800 . ?
C72 H72B 0.9800 . ?
C72 H72C 0.9800 . ?
 
loop_
 _geom_angle_atom_site_label_1
 _geom_angle_atom_site_label_2
 _geom_angle_atom_site_label_3
 _geom_angle
 _geom_angle_site_symmetry_1
 _geom_angle_site_symmetry_3
 _geom_angle_publ_flag
N6 Mg N5 118.76(8) . . ?
N6 Mg N7 120.45(8) . . ?
N5 Mg N7 120.78(8) . . ?
N6 Mg Si3 28.22(6) . . ?
N5 Mg Si3 134.22(6) . . ?
N7 Mg Si3 100.61(6) . . ?
N6 Mg Si2 133.06(6) . . ?
N5 Mg Si2 27.85(5) . . ?
N7 Mg Si2 101.18(6) . . ?
Si3 Mg Si2 158.19(3) . . ?
N6 Mg Si1 99.52(6) . . ?
N5 Mg Si1 27.70(5) . . ?
N7 Mg Si1 135.63(6) . . ?
Si3 Mg Si1 107.78(3) . . ?
Si2 Mg Si1 55.557(19) . . ?
N6 Mg Si4 27.46(5) . . ?
N5 Mg Si4 100.04(6) . . ?
N7 Mg Si4 133.76(6) . . ?
Si3 Mg Si4 55.66(2) . . ?
Si2 Mg Si4 107.00(3) . . ?
Si1 Mg Si4 90.59(2) . . ?
N6 Mg Si6 136.40(6) . . ?
N5 Mg Si6 100.61(6) . . ?
N7 Mg Si6 27.76(5) . . ?
Si3 Mg Si6 109.43(3) . . ?
Si2 Mg Si6 90.54(2) . . ?
Si1 Mg Si6 108.80(3) . . ?
Si4 Mg Si6 159.25(3) . . ?
N6 Mg Si5 100.18(6) . . ?
N5 Mg Si5 136.16(6) . . ?
N7 Mg Si5 27.30(5) . . ?
Si3 Mg Si5 89.62(3) . . ?
Si2 Mg Si5 109.57(3) . . ?
Si1 Mg Si5 160.30(3) . . ?
Si4 Mg Si5 107.21(3) . . ?
Si6 Mg Si5 55.07(2) . . ?
C1 Li C28 174.5(2) . . ?
N5 Si1 C56 114.28(10) . . ?
N5 Si1 C55 111.06(10) . . ?
C56 Si1 C55 105.83(12) . . ?
N5 Si1 C57 113.51(10) . . ?
C56 Si1 C57 104.57(12) . . ?
C55 Si1 C57 106.97(11) . . ?
N5 Si1 Mg 33.59(6) . . ?
C56 Si1 Mg 116.66(9) . . ?
C55 Si1 Mg 78.86(8) . . ?
C57 Si1 Mg 135.20(9) . . ?
N5 Si2 C59 111.83(10) . . ?
N5 Si2 C60 113.61(11) . . ?
C59 Si2 C60 106.28(12) . . ?
N5 Si2 C58 113.48(11) . . ?
C59 Si2 C58 105.31(13) . . ?
C60 Si2 C58 105.66(14) . . ?
N5 Si2 Mg 33.86(6) . . ?
C59 Si2 Mg 78.65(8) . . ?
C60 Si2 Mg 119.45(9) . . ?
C58 Si2 Mg 131.83(11) . . ?
N6 Si3 C63 111.30(11) . . ?
N6 Si3 C62 114.20(14) . . ?
C63 Si3 C62 104.51(14) . . ?
N6 Si3 C61 112.63(12) . . ?
C63 Si3 C61 107.17(17) . . ?
C62 Si3 C61 106.44(16) . . ?
N6 Si3 Mg 34.20(6) . . ?
C63 Si3 Mg 77.32(8) . . ?
C62 Si3 Mg 129.24(12) . . ?
C61 Si3 Mg 121.68(11) . . ?
N6 Si4 C66 111.08(10) . . ?
N6 Si4 C65 114.46(13) . . ?
C66 Si4 C65 106.99(14) . . ?
N6 Si4 C64 114.02(13) . . ?
C66 Si4 C64 104.72(14) . . ?
C65 Si4 C64 104.82(15) . . ?
N6 Si4 Mg 33.34(6) . . ?
C66 Si4 Mg 77.99(8) . . ?
C65 Si4 Mg 123.24(11) . . ?
C64 Si4 Mg 129.15(11) . . ?
N7 Si5 C67 111.66(10) . . ?
N7 Si5 C69 112.56(13) . . ?
C67 Si5 C69 105.40(12) . . ?
N7 Si5 C68 114.82(12) . . ?
C67 Si5 C68 105.82(14) . . ?
C69 Si5 C68 105.89(18) . . ?
N7 Si5 Mg 33.29(6) . . ?
C67 Si5 Mg 79.67(8) . . ?
C69 Si5 Mg 132.93(13) . . ?
C68 Si5 Mg 117.81(11) . . ?
N7 Si6 C72 114.23(11) . . ?
N7 Si6 C71 110.75(10) . . ?
C72 Si6 C71 106.55(13) . . ?
N7 Si6 C70 113.50(12) . . ?
C72 Si6 C70 105.61(14) . . ?
C71 Si6 C70 105.57(13) . . ?
N7 Si6 Mg 33.59(6) . . ?
C72 Si6 Mg 118.12(9) . . ?
C71 Si6 Mg 78.24(8) . . ?
C70 Si6 Mg 133.19(10) . . ?
C1 N1 C2 112.49(17) . . ?
C1 N1 C4 124.35(17) . . ?
C2 N1 C4 123.12(17) . . ?
C1 N2 C3 112.40(17) . . ?
C1 N2 C16 125.59(17) . . ?
C3 N2 C16 121.86(17) . . ?
C28 N3 C29 112.50(18) . . ?
C28 N3 C31 124.75(18) . . ?
C29 N3 C31 122.70(18) . . ?
C28 N4 C30 112.41(18) . . ?
C28 N4 C43 125.58(17) . . ?
C30 N4 C43 121.80(18) . . ?
Si2 N5 Si1 123.01(11) . . ?
Si2 N5 Mg 118.29(10) . . ?
Si1 N5 Mg 118.70(9) . . ?
Si4 N6 Si3 123.16(11) . . ?
Si4 N6 Mg 119.20(10) . . ?
Si3 N6 Mg 117.58(10) . . ?
Si5 N7 Si6 121.95(11) . . ?
Si5 N7 Mg 119.41(10) . . ?
Si6 N7 Mg 118.64(10) . . ?
N2 C1 N1 102.12(17) . . ?
N2 C1 Li 134.63(18) . . ?
N1 C1 Li 123.22(19) . . ?
C3 C2 N1 106.33(18) . . ?
C3 C2 H2 126.8 . . ?
N1 C2 H2 126.8 . . ?
C2 C3 N2 106.66(19) . . ?
C2 C3 H3 126.7 . . ?
N2 C3 H3 126.7 . . ?
C9 C4 C5 123.4(2) . . ?
C9 C4 N1 118.5(2) . . ?
C5 C4 N1 118.0(2) . . ?
C4 C5 C6 116.5(3) . . ?
C4 C5 C10 122.3(2) . . ?
C6 C5 C10 121.2(2) . . ?
C7 C6 C5 121.2(3) . . ?
C7 C6 H6 119.4 . . ?
C5 C6 H6 119.4 . . ?
C8 C7 C6 120.8(3) . . ?
C8 C7 H7 119.6 . . ?
C6 C7 H7 119.6 . . ?
C7 C8 C9 121.3(3) . . ?
C7 C8 H8 119.4 . . ?
C9 C8 H8 119.4 . . ?
C4 C9 C8 116.7(3) . . ?
C4 C9 C13 122.2(2) . . ?
C8 C9 C13 121.1(3) . . ?
C5 C10 C12 111.4(2) . . ?
C5 C10 C11 112.5(2) . . ?
C12 C10 C11 110.1(2) . . ?
C5 C10 H10 107.5 . . ?
C12 C10 H10 107.5 . . ?
C11 C10 H10 107.5 . . ?
C10 C11 H11A 109.5 . . ?
C10 C11 H11B 109.5 . . ?
H11A C11 H11B 109.5 . . ?
C10 C11 H11C 109.5 . . ?
H11A C11 H11C 109.5 . . ?
H11B C11 H11C 109.5 . . ?
C10 C12 H12A 109.5 . . ?
C10 C12 H12B 109.5 . . ?
H12A C12 H12B 109.5 . . ?
C10 C12 H12C 109.5 . . ?
H12A C12 H12C 109.5 . . ?
H12B C12 H12C 109.5 . . ?
C15 C13 C9 110.1(3) . . ?
C15 C13 C14 112.0(3) . . ?
C9 C13 C14 111.5(3) . . ?
C15 C13 H13 107.7 . . ?
C9 C13 H13 107.7 . . ?
C14 C13 H13 107.7 . . ?
C13 C14 H14A 109.5 . . ?
C13 C14 H14B 109.5 . . ?
H14A C14 H14B 109.5 . . ?
C13 C14 H14C 109.5 . . ?
H14A C14 H14C 109.5 . . ?
H14B C14 H14C 109.5 . . ?
C13 C15 H15A 109.5 . . ?
C13 C15 H15B 109.5 . . ?
H15A C15 H15B 109.5 . . ?
C13 C15 H15C 109.5 . . ?
H15A C15 H15C 109.5 . . ?
H15B C15 H15C 109.5 . . ?
C21 C16 C17 123.6(2) . . ?
C21 C16 N2 118.1(2) . . ?
C17 C16 N2 118.3(2) . . ?
C18 C17 C16 116.4(3) . . ?
C18 C17 C22 122.1(2) . . ?
C16 C17 C22 121.5(2) . . ?
C19 C18 C17 121.4(3) . . ?
C19 C18 H18 119.3 . . ?
C17 C18 H18 119.3 . . ?
C20 C19 C18 121.0(3) . . ?
C20 C19 H19 119.5 . . ?
C18 C19 H19 119.5 . . ?
C19 C20 C21 120.7(3) . . ?
C19 C20 H20 119.6 . . ?
C21 C20 H20 119.6 . . ?
C16 C21 C20 116.8(3) . . ?
C16 C21 C25 123.2(2) . . ?
C20 C21 C25 120.0(3) . . ?
C23 C22 C17 111.7(2) . . ?
C23 C22 C24 111.6(3) . . ?
C17 C22 C24 111.6(3) . . ?
C23 C22 H22 107.2 . . ?
C17 C22 H22 107.2 . . ?
C24 C22 H22 107.2 . . ?
C22 C23 H23A 109.5 . . ?
C22 C23 H23B 109.5 . . ?
H23A C23 H23B 109.5 . . ?
C22 C23 H23C 109.5 . . ?
H23A C23 H23C 109.5 . . ?
H23B C23 H23C 109.5 . . ?
C22 C24 H24A 109.5 . . ?
C22 C24 H24B 109.5 . . ?
H24A C24 H24B 109.5 . . ?
C22 C24 H24C 109.5 . . ?
H24A C24 H24C 109.5 . . ?
H24B C24 H24C 109.5 . . ?
C21 C25 C27 111.0(3) . . ?
C21 C25 C26 111.2(3) . . ?
C27 C25 C26 111.2(3) . . ?
C21 C25 H25 107.7 . . ?
C27 C25 H25 107.7 . . ?
C26 C25 H25 107.7 . . ?
C25 C26 H26A 109.5 . . ?
C25 C26 H26B 109.5 . . ?
H26A C26 H26B 109.5 . . ?
C25 C26 H26C 109.5 . . ?
H26A C26 H26C 109.5 . . ?
H26B C26 H26C 109.5 . . ?
C25 C27 H27A 109.5 . . ?
C25 C27 H27B 109.5 . . ?
H27A C27 H27B 109.5 . . ?
C25 C27 H27C 109.5 . . ?
H27A C27 H27C 109.5 . . ?
H27B C27 H27C 109.5 . . ?
N3 C28 N4 102.10(17) . . ?
N3 C28 Li 131.11(19) . . ?
N4 C28 Li 126.16(18) . . ?
C30 C29 N3 106.88(19) . . ?
C30 C29 H29 126.6 . . ?
N3 C29 H29 126.6 . . ?
C29 C30 N4 106.1(2) . . ?
C29 C30 H30 126.9 . . ?
N4 C30 H30 126.9 . . ?
C32 C31 C36 123.7(2) . . ?
C32 C31 N3 118.5(2) . . ?
C36 C31 N3 117.7(2) . . ?
C31 C32 C33 116.7(2) . . ?
C31 C32 C37 122.7(2) . . ?
C33 C32 C37 120.5(2) . . ?
C34 C33 C32 121.0(3) . . ?
C34 C33 H33 119.5 . . ?
C32 C33 H33 119.5 . . ?
C33 C34 C35 121.2(3) . . ?
C33 C34 H34 119.4 . . ?
C35 C34 H34 119.4 . . ?
C34 C35 C36 121.2(3) . . ?
C34 C35 H35 119.4 . . ?
C36 C35 H35 119.4 . . ?
C35 C36 C31 116.0(3) . . ?
C35 C36 C40 121.6(3) . . ?
C31 C36 C40 122.4(3) . . ?
C32 C37 C39 112.9(2) . . ?
C32 C37 C38 109.6(2) . . ?
C39 C37 C38 110.0(2) . . ?
C32 C37 H37 108.1 . . ?
C39 C37 H37 108.1 . . ?
C38 C37 H37 108.1 . . ?
C37 C38 H38A 109.5 . . ?
C37 C38 H38B 109.5 . . ?
H38A C38 H38B 109.5 . . ?
C37 C38 H38C 109.5 . . ?
H38A C38 H38C 109.5 . . ?
H38B C38 H38C 109.5 . . ?
C37 C39 H39A 109.5 . . ?
C37 C39 H39B 109.5 . . ?
H39A C39 H39B 109.5 . . ?
C37 C39 H39C 109.5 . . ?
H39A C39 H39C 109.5 . . ?
H39B C39 H39C 109.5 . . ?
C36 C40 C42 112.2(3) . . ?
C36 C40 C41 111.9(3) . . ?
C42 C40 C41 110.0(3) . . ?
C36 C40 H40 107.5 . . ?
C42 C40 H40 107.5 . . ?
C41 C40 H40 107.5 . . ?
C40 C41 H41A 109.5 . . ?
C40 C41 H41B 109.5 . . ?
H41A C41 H41B 109.5 . . ?
C40 C41 H41C 109.5 . . ?
H41A C41 H41C 109.5 . . ?
H41B C41 H41C 109.5 . . ?
C40 C42 H42A 109.5 . . ?
C40 C42 H42B 109.5 . . ?
H42A C42 H42B 109.5 . . ?
C40 C42 H42C 109.5 . . ?
H42A C42 H42C 109.5 . . ?
H42B C42 H42C 109.5 . . ?
C48 C43 C44 123.2(2) . . ?
C48 C43 N4 118.3(2) . . ?
C44 C43 N4 118.3(2) . . ?
C45 C44 C43 116.8(2) . . ?
C45 C44 C49 121.6(2) . . ?
C43 C44 C49 121.64(19) . . ?
C46 C45 C44 121.4(2) . . ?
C46 C45 H45 119.3 . . ?
C44 C45 H45 119.3 . . ?
C45 C46 C47 120.6(2) . . ?
C45 C46 H46 119.7 . . ?
C47 C46 H46 119.7 . . ?
C46 C47 C48 120.7(2) . . ?
C46 C47 H47 119.6 . . ?
C48 C47 H47 119.6 . . ?
C47 C48 C43 117.3(2) . . ?
C47 C48 C52 120.1(2) . . ?
C43 C48 C52 122.6(2) . . ?
C44 C49 C50 111.00(19) . . ?
C44 C49 C51 112.7(2) . . ?
C50 C49 C51 109.3(2) . . ?
C44 C49 H49 107.9 . . ?
C50 C49 H49 107.9 . . ?
C51 C49 H49 107.9 . . ?
C49 C50 H50A 109.5 . . ?
C49 C50 H50B 109.5 . . ?
H50A C50 H50B 109.5 . . ?
C49 C50 H50C 109.5 . . ?
H50A C50 H50C 109.5 . . ?
H50B C50 H50C 109.5 . . ?
C49 C51 H51A 109.5 . . ?
C49 C51 H51B 109.5 . . ?
H51A C51 H51B 109.5 . . ?
C49 C51 H51C 109.5 . . ?
H51A C51 H51C 109.5 . . ?
H51B C51 H51C 109.5 . . ?
C48 C52 C53 113.1(2) . . ?
C48 C52 C54 110.6(3) . . ?
C53 C52 C54 110.3(3) . . ?
C48 C52 H52 107.6 . . ?
C53 C52 H52 107.6 . . ?
C54 C52 H52 107.6 . . ?
C52 C53 H53A 109.5 . . ?
C52 C53 H53B 109.5 . . ?
H53A C53 H53B 109.5 . . ?
C52 C53 H53C 109.5 . . ?
H53A C53 H53C 109.5 . . ?
H53B C53 H53C 109.5 . . ?
C52 C54 H54A 109.5 . . ?
C52 C54 H54B 109.5 . . ?
H54A C54 H54B 109.5 . . ?
C52 C54 H54C 109.5 . . ?
H54A C54 H54C 109.5 . . ?
H54B C54 H54C 109.5 . . ?
Si1 C55 H55A 109.5 . . ?
Si1 C55 H55B 109.5 . . ?
H55A C55 H55B 109.5 . . ?
Si1 C55 H55C 109.5 . . ?
H55A C55 H55C 109.5 . . ?
H55B C55 H55C 109.5 . . ?
Si1 C56 H56A 109.5 . . ?
Si1 C56 H56B 109.5 . . ?
H56A C56 H56B 109.5 . . ?
Si1 C56 H56C 109.5 . . ?
H56A C56 H56C 109.5 . . ?
H56B C56 H56C 109.5 . . ?
Si1 C57 H57A 109.5 . . ?
Si1 C57 H57B 109.5 . . ?
H57A C57 H57B 109.5 . . ?
Si1 C57 H57C 109.5 . . ?
H57A C57 H57C 109.5 . . ?
H57B C57 H57C 109.5 . . ?
Si2 C58 H58A 109.5 . . ?
Si2 C58 H58B 109.5 . . ?
H58A C58 H58B 109.5 . . ?
Si2 C58 H58C 109.5 . . ?
H58A C58 H58C 109.5 . . ?
H58B C58 H58C 109.5 . . ?
Si2 C59 H59A 109.5 . . ?
Si2 C59 H59B 109.5 . . ?
H59A C59 H59B 109.5 . . ?
Si2 C59 H59C 109.5 . . ?
H59A C59 H59C 109.5 . . ?
H59B C59 H59C 109.5 . . ?
Si2 C60 H60A 109.5 . . ?
Si2 C60 H60B 109.5 . . ?
H60A C60 H60B 109.5 . . ?
Si2 C60 H60C 109.5 . . ?
H60A C60 H60C 109.5 . . ?
H60B C60 H60C 109.5 . . ?
Si3 C61 H61A 109.5 . . ?
Si3 C61 H61B 109.5 . . ?
H61A C61 H61B 109.5 . . ?
Si3 C61 H61C 109.5 . . ?
H61A C61 H61C 109.5 . . ?
H61B C61 H61C 109.5 . . ?
Si3 C62 H62A 109.5 . . ?
Si3 C62 H62B 109.5 . . ?
H62A C62 H62B 109.5 . . ?
Si3 C62 H62C 109.5 . . ?
H62A C62 H62C 109.5 . . ?
H62B C62 H62C 109.5 . . ?
Si3 C63 H63A 109.5 . . ?
Si3 C63 H63B 109.5 . . ?
H63A C63 H63B 109.5 . . ?
Si3 C63 H63C 109.5 . . ?
H63A C63 H63C 109.5 . . ?
H63B C63 H63C 109.5 . . ?
Si4 C64 H64A 109.5 . . ?
Si4 C64 H64B 109.5 . . ?
H64A C64 H64B 109.5 . . ?
Si4 C64 H64C 109.5 . . ?
H64A C64 H64C 109.5 . . ?
H64B C64 H64C 109.5 . . ?
Si4 C65 H65A 109.5 . . ?
Si4 C65 H65B 109.5 . . ?
H65A C65 H65B 109.5 . . ?
Si4 C65 H65C 109.5 . . ?
H65A C65 H65C 109.5 . . ?
H65B C65 H65C 109.5 . . ?
Si4 C66 H66A 109.5 . . ?
Si4 C66 H66B 109.5 . . ?
H66A C66 H66B 109.5 . . ?
Si4 C66 H66C 109.5 . . ?
H66A C66 H66C 109.5 . . ?
H66B C66 H66C 109.5 . . ?
Si5 C67 H67A 109.5 . . ?
Si5 C67 H67B 109.5 . . ?
H67A C67 H67B 109.5 . . ?
Si5 C67 H67C 109.5 . . ?
H67A C67 H67C 109.5 . . ?
H67B C67 H67C 109.5 . . ?
Si5 C68 H68A 109.5 . . ?
Si5 C68 H68B 109.5 . . ?
H68A C68 H68B 109.5 . . ?
Si5 C68 H68C 109.5 . . ?
H68A C68 H68C 109.5 . . ?
H68B C68 H68C 109.5 . . ?
Si5 C69 H69A 109.5 . . ?
Si5 C69 H69B 109.5 . . ?
H69A C69 H69B 109.5 . . ?
Si5 C69 H69C 109.5 . . ?
H69A C69 H69C 109.5 . . ?
H69B C69 H69C 109.5 . . ?
Si6 C70 H70A 109.5 . . ?
Si6 C70 H70B 109.5 . . ?
H70A C70 H70B 109.5 . . ?
Si6 C70 H70C 109.5 . . ?
H70A C70 H70C 109.5 . . ?
H70B C70 H70C 109.5 . . ?
Si6 C71 H71A 109.5 . . ?
Si6 C71 H71B 109.5 . . ?
H71A C71 H71B 109.5 . . ?
Si6 C71 H71C 109.5 . . ?
H71A C71 H71C 109.5 . . ?
H71B C71 H71C 109.5 . . ?
Si6 C72 H72A 109.5 . . ?
Si6 C72 H72B 109.5 . . ?
H72A C72 H72B 109.5 . . ?
Si6 C72 H72C 109.5 . . ?
H72A C72 H72C 109.5 . . ?
H72B C72 H72C 109.5 . . ?
 
_diffrn_measured_fraction_theta_max    0.981
_diffrn_reflns_theta_full              27.49
_diffrn_measured_fraction_theta_full   0.981
_refine_diff_density_max    0.577
_refine_diff_density_min   -0.338
_refine_diff_density_rms    0.047

#=====>END

#======================================================

 
data_compound2
 
_audit_creation_method            SHELXL-97
_chemical_name_systematic
;
 ?
;
_chemical_name_common             ?
_chemical_melting_point           ?
_chemical_formula_moiety          
'C54 H72 N4 Na, C18 H54 Mg N3 Si6'
_chemical_formula_sum
'C72 H126 Mg N7 Na Si6'
_chemical_formula_weight          1305.64
 
loop_
 _atom_type_symbol
 _atom_type_description
 _atom_type_scat_dispersion_real
 _atom_type_scat_dispersion_imag
 _atom_type_scat_source
 'C'  'C'   0.0033   0.0016
 'International Tables Vol C Tables 4.2.6.8 and 6.1.1.4'
 'H'  'H'   0.0000   0.0000
 'International Tables Vol C Tables 4.2.6.8 and 6.1.1.4'
 'N'  'N'   0.0061   0.0033
 'International Tables Vol C Tables 4.2.6.8 and 6.1.1.4'
 'Si'  'Si'   0.0817   0.0704
 'International Tables Vol C Tables 4.2.6.8 and 6.1.1.4'
 'Na'  'Na'   0.0362   0.0249
 'International Tables Vol C Tables 4.2.6.8 and 6.1.1.4'
 'Mg'  'Mg'   0.0486   0.0363
 'International Tables Vol C Tables 4.2.6.8 and 6.1.1.4'
 
_symmetry_cell_setting            monoclinic
_symmetry_space_group_name_H-M    'P 1 21/n 1'
 
loop_
 _symmetry_equiv_pos_as_xyz
 'x, y, z'
 '-x+1/2, y+1/2, -z+1/2'
 '-x, -y, -z'
 'x-1/2, -y-1/2, z-1/2'
 
_cell_length_a                    20.7615(4)
_cell_length_b                    21.1624(5)
_cell_length_c                    21.1223(3)
_cell_angle_alpha                 90.00
_cell_angle_beta                  113.902(2)
_cell_angle_gamma                 90.00
_cell_volume                      8484.5(3)
_cell_formula_units_Z             4
_cell_measurement_temperature     150(2)
_cell_measurement_reflns_used     90627
_cell_measurement_theta_min        2.910
_cell_measurement_theta_max        25.028
 
_exptl_crystal_description        needle
_exptl_crystal_colour             colourless
_exptl_crystal_size_max           0.50
_exptl_crystal_size_mid           0.10
_exptl_crystal_size_min           0.10
_exptl_crystal_density_meas       ?
_exptl_crystal_density_diffrn     1.022
_exptl_crystal_density_method     'not measured'
_exptl_crystal_F_000              2856
_exptl_absorpt_coefficient_mu     0.150
_exptl_absorpt_correction_type    none
_exptl_absorpt_correction_T_min   ?
_exptl_absorpt_correction_T_max   ?
_exptl_absorpt_process_details    ?
 
_exptl_special_details
;
 ?
;
 
_diffrn_ambient_temperature       150(2)
_diffrn_radiation_wavelength      0.71073
_diffrn_radiation_type            MoK\a
_diffrn_radiation_source          'fine-focus sealed tube'
_diffrn_radiation_monochromator   graphite
_diffrn_measurement_device_type   'Nonius Kappa CCD'
_diffrn_measurement_method        '355 1.5 degree images with \f and \w scans'
_diffrn_standards_number          0
_diffrn_standards_decay_%         0
_diffrn_reflns_number             116857
_diffrn_reflns_av_R_equivalents   0.1576
_diffrn_reflns_av_sigmaI/netI     0.0748
_diffrn_reflns_limit_h_min        -24
_diffrn_reflns_limit_h_max        24
_diffrn_reflns_limit_k_min        -25
_diffrn_reflns_limit_k_max        25
_diffrn_reflns_limit_l_min        -25
_diffrn_reflns_limit_l_max        25
_diffrn_reflns_theta_min          4.89
_diffrn_reflns_theta_max          25.06
_reflns_number_total              14751
_reflns_number_gt                 8812
_reflns_threshold_expression      >2sigma(I)
 
_computing_data_collection        'Collect (Nonius BV, 1997-2000)'
_computing_cell_refinement         'HKL Scalepack (Otwinski & Minor, 1997)'
_computing_data_reduction         
;
 DENZO-SCALEPACK Z. Otwinowski and W. Minor, " 
 Processing of X-ray Diffraction Data Collected in Oscillation Mode ", 
 Methods in Enzymology, Volume 276: Macromolecular Crystallography, 
 part A, p.307-326, 1997,C.W. Carter, Jr. & R. M. Sweet, Eds., Academic Press.
;
_computing_structure_solution     
; 
 SIR97- Altomare A., Burla M.C., Camalli M., Cascarano G.L., Giacovazzo C. , 
 Guagliardi A., Moliterni A.G.G., Polidori G.,Spagna R. 
 (1999) J. Appl. Cryst. 32, 115-119
;
_computing_structure_refinement   
;
 SHELXL97 -Program for Crystal Structure Analysis (Release 97-2). 
 Sheldrick, G.M., Instit\"ut f\"ur Anorganische Chemie der Universit\"at, 
 Tammanstrasse 4, D-3400 G\"ottingen, Germany, 1998 
;
_computing_molecular_graphics  

'ORTEP3 for Windows - Farrugia, L. J. J. Appl. Crystallogr. 1997, 30, 565'

_computing_publication_material    
;
 'WinGX publication routines, Farrugia, 
 L. J., J. Appl. Crystallogr., 1999, 32, 837-838
; 
 
_refine_special_details
;
 Refinement of F^2^ against ALL reflections.  The weighted R-factor wR and
 goodness of fit S are based on F^2^, conventional R-factors R are based
 on F, with F set to zero for negative F^2^. The threshold expression of
 F^2^ > 2sigma(F^2^) is used only for calculating R-factors(gt) etc. and is
 not relevant to the choice of reflections for refinement.  R-factors based
 on F^2^ are statistically about twice as large as those based on F, and R-
 factors based on ALL data will be even larger.
;
 
_refine_ls_structure_factor_coef  Fsqd
_refine_ls_matrix_type            full
_refine_ls_weighting_scheme       calc
_refine_ls_weighting_details
 'calc w=1/[\s^2^(Fo^2^)+(0.0308P)^2^+22.8285P] where P=(Fo^2^+2Fc^2^)/3'
_atom_sites_solution_primary      direct
_atom_sites_solution_secondary    difmap
_atom_sites_solution_hydrogens    geom
_refine_ls_hydrogen_treatment     constr
_refine_ls_extinction_method      none
_refine_ls_extinction_coef        ?
_refine_ls_number_reflns          14751
_refine_ls_number_parameters      828
_refine_ls_number_restraints      0
_refine_ls_R_factor_all           0.1398
_refine_ls_R_factor_gt            0.0718
_refine_ls_wR_factor_ref          0.1967
_refine_ls_wR_factor_gt           0.1555
_refine_ls_goodness_of_fit_ref    1.058
_refine_ls_restrained_S_all       1.058
_refine_ls_shift/su_max           0.000
_refine_ls_shift/su_mean          0.000
 
loop_
 _atom_site_label
 _atom_site_type_symbol
 _atom_site_fract_x
 _atom_site_fract_y
 _atom_site_fract_z
 _atom_site_U_iso_or_equiv
 _atom_site_adp_type
 _atom_site_occupancy
 _atom_site_symmetry_multiplicity
 _atom_site_calc_flag
 _atom_site_refinement_flags
 _atom_site_disorder_assembly
 _atom_site_disorder_group
Na Na 0.62726(12) 0.21625(9) 0.34766(11) 0.0660(6) Uani 1 1 d . . .
Mg Mg 0.13566(7) 0.22311(7) 0.34498(7) 0.0334(3) Uani 1 1 d . . .
Si1 Si 0.14841(7) 0.13113(6) 0.47016(6) 0.0436(3) Uani 1 1 d . . .
Si2 Si 0.27052(6) 0.21454(6) 0.48936(6) 0.0410(3) Uani 1 1 d . . .
Si3 Si 0.09665(9) 0.36066(6) 0.38371(7) 0.0525(4) Uani 1 1 d . . .
Si4 Si 0.14527(7) 0.35182(6) 0.26902(7) 0.0429(3) Uani 1 1 d . . .
Si5 Si 0.00644(7) 0.17698(6) 0.20686(6) 0.0421(3) Uani 1 1 d . . .
Si6 Si 0.14037(7) 0.10444(6) 0.25225(6) 0.0434(3) Uani 1 1 d . . .
N1 N 0.65312(18) 0.05619(16) 0.30016(17) 0.0355(8) Uani 1 1 d . . .
N2 N 0.59609(18) 0.06712(15) 0.36338(16) 0.0334(8) Uani 1 1 d . . .
N3 N 0.68970(19) 0.36401(17) 0.36682(18) 0.0426(9) Uani 1 1 d . . .
N4 N 0.58006(19) 0.37857(17) 0.31672(19) 0.0436(9) Uani 1 1 d . . .
N5 N 0.18886(18) 0.18589(16) 0.44056(16) 0.0355(8) Uani 1 1 d . . .
N6 N 0.12656(18) 0.31861(16) 0.33265(17) 0.0368(8) Uani 1 1 d . . .
N7 N 0.09138(18) 0.16457(16) 0.26274(17) 0.0362(8) Uani 1 1 d . . .
C1 C 0.6311(2) 0.10169(19) 0.3324(2) 0.0347(9) Uani 1 1 d . . .
C2 C 0.5969(2) 0.0029(2) 0.3500(2) 0.0397(10) Uani 1 1 d . . .
H2 H 0.5756 -0.0299 0.3657 0.048 Uiso 1 1 calc R . .
C3 C 0.6331(2) -0.0036(2) 0.3112(2) 0.0417(11) Uani 1 1 d . . .
H3 H 0.6434 -0.0422 0.2942 0.050 Uiso 1 1 calc R . .
C4 C 0.6912(3) 0.0697(2) 0.2571(2) 0.0448(11) Uani 1 1 d . . .
C5 C 0.7643(3) 0.0719(3) 0.2886(3) 0.0589(14) Uani 1 1 d . . .
C6 C 0.7989(3) 0.0875(3) 0.2455(4) 0.080(2) Uani 1 1 d . . .
H6 H 0.8489 0.0900 0.2650 0.096 Uiso 1 1 calc R . .
C7 C 0.7625(4) 0.0993(3) 0.1759(4) 0.082(2) Uani 1 1 d . . .
H7 H 0.7871 0.1107 0.1482 0.098 Uiso 1 1 calc R . .
C8 C 0.6897(4) 0.0942(3) 0.1465(3) 0.0679(16) Uani 1 1 d . . .
H8 H 0.6647 0.1011 0.0982 0.082 Uiso 1 1 calc R . .
C9 C 0.6526(3) 0.0793(2) 0.1863(2) 0.0489(12) Uani 1 1 d . . .
C10 C 0.8055(3) 0.0598(3) 0.3648(3) 0.0743(18) Uani 1 1 d . . .
H10 H 0.7735 0.0380 0.3827 0.089 Uiso 1 1 calc R . .
C11 C 0.8287(5) 0.1214(4) 0.4038(4) 0.116(3) Uani 1 1 d . . .
H11A H 0.8556 0.1460 0.3835 0.174 Uiso 1 1 calc R . .
H11B H 0.8584 0.1125 0.4525 0.174 Uiso 1 1 calc R . .
H11C H 0.7872 0.1455 0.4005 0.174 Uiso 1 1 calc R . .
C12 C 0.8693(4) 0.0159(4) 0.3781(5) 0.112(3) Uani 1 1 d . . .
H12A H 0.9027 0.0371 0.3631 0.168 Uiso 1 1 calc R . .
H12B H 0.8530 -0.0234 0.3519 0.168 Uiso 1 1 calc R . .
H12C H 0.8925 0.0062 0.4276 0.168 Uiso 1 1 calc R . .
C13 C 0.5732(3) 0.0755(3) 0.1524(3) 0.0625(15) Uani 1 1 d . . .
H13 H 0.5573 0.0516 0.1844 0.075 Uiso 1 1 calc R . .
C14 C 0.5435(5) 0.0414(4) 0.0821(3) 0.104(3) Uani 1 1 d . . .
H14A H 0.5502 0.0679 0.0472 0.155 Uiso 1 1 calc R . .
H14B H 0.4932 0.0332 0.0682 0.155 Uiso 1 1 calc R . .
H14C H 0.5683 0.0012 0.0861 0.155 Uiso 1 1 calc R . .
C15 C 0.5417(3) 0.1422(3) 0.1438(3) 0.085(2) Uani 1 1 d . . .
H15A H 0.5589 0.1633 0.1890 0.127 Uiso 1 1 calc R . .
H15B H 0.4902 0.1394 0.1249 0.127 Uiso 1 1 calc R . .
H15C H 0.5558 0.1666 0.1121 0.127 Uiso 1 1 calc R . .
C16 C 0.5596(3) 0.0962(2) 0.4011(2) 0.0430(11) Uani 1 1 d . . .
C17 C 0.4939(3) 0.1239(2) 0.3632(3) 0.0512(12) Uani 1 1 d . . .
C18 C 0.4606(3) 0.1525(3) 0.4018(4) 0.0763(18) Uani 1 1 d . . .
H18 H 0.4159 0.1717 0.3782 0.092 Uiso 1 1 calc R . .
C19 C 0.4907(4) 0.1534(3) 0.4722(4) 0.094(2) Uani 1 1 d . . .
H19 H 0.4673 0.1739 0.4969 0.113 Uiso 1 1 calc R . .
C20 C 0.5556(4) 0.1246(3) 0.5082(3) 0.085(2) Uani 1 1 d . . .
H20 H 0.5757 0.1257 0.5574 0.102 Uiso 1 1 calc R . .
C21 C 0.5919(3) 0.0941(2) 0.4740(2) 0.0577(14) Uani 1 1 d . . .
C22 C 0.4590(3) 0.1220(3) 0.2851(3) 0.0573(13) Uani 1 1 d . . .
H22 H 0.4957 0.1100 0.2681 0.069 Uiso 1 1 calc R . .
C23 C 0.4029(4) 0.0720(3) 0.2614(4) 0.094(2) Uani 1 1 d . . .
H23A H 0.4245 0.0304 0.2765 0.141 Uiso 1 1 calc R . .
H23B H 0.3791 0.0727 0.2107 0.141 Uiso 1 1 calc R . .
H23C H 0.3685 0.0801 0.2813 0.141 Uiso 1 1 calc R . .
C24 C 0.4289(4) 0.1853(3) 0.2533(3) 0.094(2) Uani 1 1 d . . .
H24A H 0.4136 0.1831 0.2030 0.140 Uiso 1 1 calc R . .
H24B H 0.4651 0.2180 0.2722 0.140 Uiso 1 1 calc R . .
H24C H 0.3885 0.1957 0.2642 0.140 Uiso 1 1 calc R . .
C25 C 0.6607(3) 0.0622(3) 0.5133(3) 0.0694(17) Uani 1 1 d . . .
H25 H 0.6697 0.0334 0.4802 0.083 Uiso 1 1 calc R . .
C26 C 0.6599(6) 0.0213(5) 0.5727(4) 0.159(5) Uani 1 1 d . . .
H26A H 0.6517 0.0482 0.6065 0.239 Uiso 1 1 calc R . .
H26B H 0.7053 -0.0003 0.5952 0.239 Uiso 1 1 calc R . .
H26C H 0.6221 -0.0101 0.5544 0.239 Uiso 1 1 calc R . .
C27 C 0.7205(5) 0.1100(4) 0.5385(6) 0.162(5) Uani 1 1 d . . .
H27A H 0.7162 0.1386 0.5006 0.243 Uiso 1 1 calc R . .
H27B H 0.7657 0.0877 0.5544 0.243 Uiso 1 1 calc R . .
H27C H 0.7181 0.1344 0.5770 0.243 Uiso 1 1 calc R . .
C28 C 0.6278(2) 0.3317(2) 0.3427(2) 0.0364(10) Uani 1 1 d . . .
C29 C 0.6113(3) 0.4380(2) 0.3249(3) 0.0592(14) Uani 1 1 d . . .
H29 H 0.5879 0.4774 0.3112 0.071 Uiso 1 1 calc R . .
C30 C 0.6810(3) 0.4283(2) 0.3559(3) 0.0580(14) Uani 1 1 d . . .
H30 H 0.7170 0.4594 0.3679 0.070 Uiso 1 1 calc R . .
C31 C 0.5045(2) 0.3684(2) 0.2877(2) 0.0446(11) Uani 1 1 d . . .
C32 C 0.4695(2) 0.3616(2) 0.2158(2) 0.0451(11) Uani 1 1 d . B .
C33 C 0.3980(3) 0.3496(3) 0.1900(3) 0.0575(14) Uani 1 1 d . . .
H33 H 0.3726 0.3442 0.1415 0.069 Uiso 1 1 calc R . .
C34 C 0.3629(3) 0.3452(3) 0.2327(3) 0.0672(16) Uani 1 1 d . . .
H34 H 0.3138 0.3367 0.2136 0.081 Uiso 1 1 calc R . .
C35 C 0.3984(3) 0.3532(3) 0.3024(3) 0.0707(17) Uani 1 1 d . . .
H35 H 0.3733 0.3499 0.3312 0.085 Uiso 1 1 calc R . .
C36 C 0.4705(3) 0.3662(2) 0.3328(3) 0.0549(13) Uani 1 1 d . . .
C37 C 0.5064(3) 0.3679(3) 0.1677(2) 0.0525(12) Uani 1 1 d . . .
H37 H 0.5586 0.3694 0.1947 0.063 Uiso 0.50 1 calc PR A 1
H37A H 0.5521 0.3894 0.1953 0.063 Uiso 0.50 1 calc PR A 2
C39 C 0.4866(8) 0.3146(7) 0.1129(7) 0.070(4) Uani 0.50 1 d P B 1
H39A H 0.5118 0.3209 0.0829 0.105 Uiso 0.50 1 calc PR B 1
H39B H 0.4357 0.3155 0.0847 0.105 Uiso 0.50 1 calc PR B 1
H39C H 0.4996 0.2736 0.1362 0.105 Uiso 0.50 1 calc PR B 1
C38 C 0.4798(15) 0.4300(10) 0.1257(12) 0.067(5) Uani 0.50 1 d P B 1
H38A H 0.5029 0.4355 0.0938 0.101 Uiso 0.50 1 calc PR B 1
H38B H 0.4910 0.4659 0.1576 0.101 Uiso 0.50 1 calc PR B 1
H38C H 0.4287 0.4276 0.0992 0.101 Uiso 0.50 1 calc PR B 1
C39A C 0.5262(9) 0.3025(7) 0.1514(8) 0.077(4) Uani 0.50 1 d P B 2
H39D H 0.5502 0.3065 0.1201 0.115 Uiso 0.50 1 calc PR B 2
H39E H 0.4834 0.2771 0.1291 0.115 Uiso 0.50 1 calc PR B 2
H39F H 0.5576 0.2819 0.1944 0.115 Uiso 0.50 1 calc PR B 2
C38A C 0.4727(16) 0.4062(13) 0.1041(13) 0.111(11) Uani 0.50 1 d P B 2
H38D H 0.5023 0.4057 0.0779 0.166 Uiso 0.50 1 calc PR B 2
H38E H 0.4671 0.4498 0.1167 0.166 Uiso 0.50 1 calc PR B 2
H38F H 0.4263 0.3885 0.0755 0.166 Uiso 0.50 1 calc PR B 2
C40 C 0.5101(4) 0.3771(3) 0.4096(3) 0.0706(16) Uani 1 1 d . . .
H40 H 0.5562 0.3976 0.4178 0.085 Uiso 1 1 calc R . .
C41 C 0.4685(6) 0.4208(5) 0.4382(4) 0.143(4) Uani 1 1 d . . .
H41A H 0.4570 0.4603 0.4117 0.215 Uiso 1 1 calc R . .
H41B H 0.4973 0.4302 0.4870 0.215 Uiso 1 1 calc R . .
H41C H 0.4250 0.3998 0.4340 0.215 Uiso 1 1 calc R . .
C42 C 0.5244(4) 0.3154(3) 0.4498(3) 0.086(2) Uani 1 1 d . . .
H42A H 0.4804 0.2996 0.4508 0.129 Uiso 1 1 calc R . .
H42B H 0.5589 0.3226 0.4972 0.129 Uiso 1 1 calc R . .
H42C H 0.5429 0.2842 0.4272 0.129 Uiso 1 1 calc R . .
C43 C 0.7582(2) 0.3342(2) 0.4006(2) 0.0449(11) Uani 1 1 d . . .
C44 C 0.7859(2) 0.3265(2) 0.4725(2) 0.0469(11) Uani 1 1 d . . .
C45 C 0.8531(3) 0.3001(3) 0.5036(3) 0.0601(14) Uani 1 1 d . . .
H45 H 0.8740 0.2942 0.5523 0.072 Uiso 1 1 calc R . .
C46 C 0.8893(3) 0.2826(3) 0.4643(3) 0.0724(17) Uani 1 1 d . . .
H46 H 0.9354 0.2656 0.4864 0.087 Uiso 1 1 calc R . .
C47 C 0.8594(3) 0.2896(3) 0.3933(3) 0.0633(15) Uani 1 1 d . . .
H47 H 0.8850 0.2760 0.3672 0.076 Uiso 1 1 calc R . .
C48 C 0.7933(3) 0.3157(2) 0.3592(2) 0.0504(12) Uani 1 1 d . . .
C49 C 0.7467(3) 0.3468(3) 0.5160(3) 0.0614(14) Uani 1 1 d . . .
H49 H 0.6975 0.3581 0.4837 0.074 Uiso 1 1 calc R . .
C50 C 0.7421(4) 0.2947(3) 0.5626(4) 0.095(2) Uani 1 1 d . . .
H50A H 0.7186 0.2579 0.5345 0.142 Uiso 1 1 calc R . .
H50B H 0.7151 0.3094 0.5885 0.142 Uiso 1 1 calc R . .
H50C H 0.7897 0.2828 0.5951 0.142 Uiso 1 1 calc R . .
C51 C 0.7810(5) 0.4058(4) 0.5575(4) 0.108(3) Uani 1 1 d . . .
H51A H 0.8275 0.3949 0.5930 0.161 Uiso 1 1 calc R . .
H51B H 0.7513 0.4226 0.5797 0.161 Uiso 1 1 calc R . .
H51C H 0.7864 0.4378 0.5264 0.161 Uiso 1 1 calc R . .
C52 C 0.7610(3) 0.3221(3) 0.2812(2) 0.0588(14) Uani 1 1 d . . .
H52 H 0.7133 0.3414 0.2676 0.071 Uiso 1 1 calc R . .
C53 C 0.7510(4) 0.2576(3) 0.2459(3) 0.086(2) Uani 1 1 d . . .
H53A H 0.7276 0.2631 0.1955 0.128 Uiso 1 1 calc R . .
H53B H 0.7219 0.2307 0.2616 0.128 Uiso 1 1 calc R . .
H53C H 0.7970 0.2376 0.2578 0.128 Uiso 1 1 calc R . .
C54 C 0.8029(4) 0.3651(4) 0.2561(3) 0.111(3) Uani 1 1 d . . .
H54A H 0.8483 0.3453 0.2642 0.167 Uiso 1 1 calc R . .
H54B H 0.8110 0.4053 0.2811 0.167 Uiso 1 1 calc R . .
H54C H 0.7769 0.3728 0.2064 0.167 Uiso 1 1 calc R . .
C55 C 0.1890(3) 0.0497(2) 0.4799(3) 0.0655(15) Uani 1 1 d . . .
H55A H 0.2337 0.0489 0.5208 0.098 Uiso 1 1 calc R . .
H55B H 0.1974 0.0396 0.4387 0.098 Uiso 1 1 calc R . .
H55C H 0.1568 0.0185 0.4854 0.098 Uiso 1 1 calc R . .
C56 C 0.1506(4) 0.1510(3) 0.5578(3) 0.0747(18) Uani 1 1 d . . .
H56A H 0.1331 0.1941 0.5572 0.112 Uiso 1 1 calc R . .
H56B H 0.1991 0.1479 0.5927 0.112 Uiso 1 1 calc R . .
H56C H 0.1207 0.1212 0.5692 0.112 Uiso 1 1 calc R . .
C57 C 0.0533(3) 0.1217(3) 0.4121(3) 0.0591(14) Uani 1 1 d . . .
H57A H 0.0487 0.1109 0.3653 0.089 Uiso 1 1 calc R . .
H57B H 0.0284 0.1614 0.4106 0.089 Uiso 1 1 calc R . .
H57C H 0.0329 0.0879 0.4297 0.089 Uiso 1 1 calc R . .
C58 C 0.3354(3) 0.1510(3) 0.5369(3) 0.0668(16) Uani 1 1 d . . .
H58A H 0.3352 0.1182 0.5041 0.100 Uiso 1 1 calc R . .
H58B H 0.3222 0.1324 0.5724 0.100 Uiso 1 1 calc R . .
H58C H 0.3827 0.1694 0.5589 0.100 Uiso 1 1 calc R . .
C59 C 0.2727(3) 0.2718(3) 0.5580(3) 0.0655(15) Uani 1 1 d . . .
H59A H 0.2645 0.2490 0.5945 0.098 Uiso 1 1 calc R . .
H59B H 0.2358 0.3037 0.5375 0.098 Uiso 1 1 calc R . .
H59C H 0.3188 0.2926 0.5779 0.098 Uiso 1 1 calc R . .
C60 C 0.3086(3) 0.2573(2) 0.4351(3) 0.0519(12) Uani 1 1 d . . .
H60A H 0.2765 0.2912 0.4093 0.078 Uiso 1 1 calc R . .
H60B H 0.3150 0.2277 0.4025 0.078 Uiso 1 1 calc R . .
H60C H 0.3542 0.2755 0.4650 0.078 Uiso 1 1 calc R . .
C61 C 0.0687(3) 0.3089(3) 0.4386(3) 0.0554(13) Uani 1 1 d . . .
H61A H 0.1078 0.2813 0.4665 0.083 Uiso 1 1 calc R . .
H61B H 0.0286 0.2830 0.4091 0.083 Uiso 1 1 calc R . .
H61C H 0.0547 0.3350 0.4693 0.083 Uiso 1 1 calc R . .
C62 C 0.1628(5) 0.4174(3) 0.4440(4) 0.107(3) Uani 1 1 d . . .
H62A H 0.1718 0.4513 0.4171 0.161 Uiso 1 1 calc R . .
H62B H 0.2068 0.3949 0.4705 0.161 Uiso 1 1 calc R . .
H62C H 0.1443 0.4355 0.4759 0.161 Uiso 1 1 calc R . .
C63 C 0.0159(5) 0.4099(4) 0.3329(4) 0.117(3) Uani 1 1 d . . .
H63A H -0.0174 0.3846 0.2948 0.176 Uiso 1 1 calc R . .
H63B H 0.0299 0.4472 0.3141 0.176 Uiso 1 1 calc R . .
H63C H -0.0066 0.4233 0.3635 0.176 Uiso 1 1 calc R . .
C64 C 0.2115(3) 0.4186(3) 0.2994(3) 0.0634(14) Uani 1 1 d . . .
H64A H 0.2549 0.4034 0.3366 0.095 Uiso 1 1 calc R . .
H64B H 0.1919 0.4533 0.3167 0.095 Uiso 1 1 calc R . .
H64C H 0.2218 0.4335 0.2606 0.095 Uiso 1 1 calc R . .
C65 C 0.0654(3) 0.3866(3) 0.1974(3) 0.0609(14) Uani 1 1 d . . .
H65A H 0.0433 0.4176 0.2169 0.091 Uiso 1 1 calc R . .
H65B H 0.0316 0.3529 0.1744 0.091 Uiso 1 1 calc R . .
H65C H 0.0796 0.4076 0.1637 0.091 Uiso 1 1 calc R . .
C66 C 0.1835(3) 0.2930(2) 0.2281(3) 0.0524(12) Uani 1 1 d . . .
H66A H 0.1525 0.2561 0.2131 0.079 Uiso 1 1 calc R . .
H66B H 0.2301 0.2798 0.2618 0.079 Uiso 1 1 calc R . .
H66C H 0.1882 0.3122 0.1879 0.079 Uiso 1 1 calc R . .
C67 C -0.0409(3) 0.2293(3) 0.2449(3) 0.0588(14) Uani 1 1 d . . .
H67A H -0.0370 0.2118 0.2893 0.088 Uiso 1 1 calc R . .
H67B H -0.0907 0.2321 0.2131 0.088 Uiso 1 1 calc R . .
H67C H -0.0199 0.2716 0.2523 0.088 Uiso 1 1 calc R . .
C68 C -0.0033(3) 0.2136(3) 0.1226(3) 0.0633(15) Uani 1 1 d . . .
H68A H 0.0213 0.1875 0.1010 0.095 Uiso 1 1 calc R . .
H68B H 0.0171 0.2561 0.1310 0.095 Uiso 1 1 calc R . .
H68C H -0.0534 0.2162 0.0916 0.095 Uiso 1 1 calc R . .
C69 C -0.0460(3) 0.1018(3) 0.1821(3) 0.0664(15) Uani 1 1 d . . .
H69A H -0.0431 0.0798 0.2240 0.100 Uiso 1 1 calc R . .
H69B H -0.0270 0.0746 0.1562 0.100 Uiso 1 1 calc R . .
H69C H -0.0954 0.1117 0.1531 0.100 Uiso 1 1 calc R . .
C70 C 0.1326(3) 0.0957(3) 0.1609(3) 0.0672(16) Uani 1 1 d . . .
H70A H 0.0831 0.0892 0.1298 0.101 Uiso 1 1 calc R . .
H70B H 0.1606 0.0594 0.1581 0.101 Uiso 1 1 calc R . .
H70C H 0.1501 0.1341 0.1473 0.101 Uiso 1 1 calc R . .
C71 C 0.1189(3) 0.0246(3) 0.2765(3) 0.0680(16) Uani 1 1 d . . .
H71A H 0.0690 0.0153 0.2492 0.102 Uiso 1 1 calc R . .
H71B H 0.1285 0.0241 0.3259 0.102 Uiso 1 1 calc R . .
H71C H 0.1480 -0.0074 0.2670 0.102 Uiso 1 1 calc R . .
C72 C 0.2358(3) 0.1167(3) 0.3065(3) 0.0599(14) Uani 1 1 d . . .
H72A H 0.2503 0.1581 0.2960 0.090 Uiso 1 1 calc R . .
H72B H 0.2632 0.0835 0.2965 0.090 Uiso 1 1 calc R . .
H72C H 0.2441 0.1150 0.3556 0.090 Uiso 1 1 calc R . .
 
loop_
 _atom_site_aniso_label
 _atom_site_aniso_U_11
 _atom_site_aniso_U_22
 _atom_site_aniso_U_33
 _atom_site_aniso_U_23
 _atom_site_aniso_U_13
 _atom_site_aniso_U_12
Na 0.0857(15) 0.0321(10) 0.0743(14) 0.0005(9) 0.0262(12) 0.0014(10)
Mg 0.0338(7) 0.0352(7) 0.0302(7) 0.0005(6) 0.0120(6) -0.0003(6)
Si1 0.0530(8) 0.0421(7) 0.0370(7) 0.0039(5) 0.0195(6) -0.0034(6)
Si2 0.0344(7) 0.0487(8) 0.0350(6) 0.0021(5) 0.0089(5) 0.0026(6)
Si3 0.0773(10) 0.0395(7) 0.0455(7) 0.0009(6) 0.0298(7) 0.0120(7)
Si4 0.0468(7) 0.0400(7) 0.0437(7) 0.0055(5) 0.0200(6) -0.0001(6)
Si5 0.0374(7) 0.0490(8) 0.0359(6) -0.0053(6) 0.0107(5) -0.0051(6)
Si6 0.0520(8) 0.0401(7) 0.0410(7) -0.0033(5) 0.0219(6) 0.0014(6)
N1 0.037(2) 0.035(2) 0.0347(19) 0.0000(15) 0.0150(16) -0.0006(16)
N2 0.0372(19) 0.0315(19) 0.0311(18) 0.0013(14) 0.0134(15) 0.0004(15)
N3 0.038(2) 0.034(2) 0.044(2) 0.0014(16) 0.0046(17) -0.0012(17)
N4 0.038(2) 0.035(2) 0.047(2) 0.0028(16) 0.0055(17) 0.0019(17)
N5 0.0356(19) 0.038(2) 0.0311(18) 0.0012(15) 0.0120(15) -0.0017(16)
N6 0.040(2) 0.0357(19) 0.0339(18) 0.0014(15) 0.0137(16) 0.0035(16)
N7 0.0356(19) 0.039(2) 0.0354(19) -0.0021(15) 0.0162(15) -0.0024(16)
C1 0.036(2) 0.033(2) 0.032(2) -0.0011(18) 0.0095(18) 0.0031(19)
C2 0.044(3) 0.036(2) 0.040(2) 0.0000(19) 0.019(2) -0.004(2)
C3 0.055(3) 0.030(2) 0.042(2) -0.0008(19) 0.022(2) 0.001(2)
C4 0.056(3) 0.034(2) 0.057(3) 0.004(2) 0.036(2) 0.002(2)
C5 0.052(3) 0.057(3) 0.078(4) 0.026(3) 0.037(3) 0.015(3)
C6 0.058(4) 0.083(4) 0.115(5) 0.040(4) 0.051(4) 0.013(3)
C7 0.098(5) 0.080(4) 0.101(5) 0.041(4) 0.074(4) 0.025(4)
C8 0.096(5) 0.066(4) 0.059(3) 0.014(3) 0.049(3) 0.010(3)
C9 0.070(3) 0.040(3) 0.046(3) 0.002(2) 0.033(3) 0.003(2)
C10 0.046(3) 0.088(5) 0.085(4) 0.039(4) 0.023(3) 0.003(3)
C11 0.103(6) 0.129(7) 0.078(5) 0.025(5) -0.003(4) 0.006(5)
C12 0.062(4) 0.125(6) 0.154(7) 0.085(6) 0.049(4) 0.032(4)
C13 0.077(4) 0.073(4) 0.036(3) 0.001(2) 0.022(3) -0.015(3)
C14 0.143(7) 0.117(6) 0.046(3) -0.007(4) 0.033(4) -0.059(5)
C15 0.071(4) 0.100(5) 0.071(4) 0.020(4) 0.016(3) 0.012(4)
C16 0.057(3) 0.040(3) 0.040(2) 0.005(2) 0.028(2) 0.012(2)
C17 0.054(3) 0.053(3) 0.055(3) 0.010(2) 0.031(2) 0.013(2)
C18 0.076(4) 0.081(4) 0.092(5) 0.027(3) 0.056(4) 0.040(3)
C19 0.132(6) 0.100(5) 0.086(5) 0.022(4) 0.082(5) 0.056(5)
C20 0.136(6) 0.083(4) 0.054(3) 0.010(3) 0.057(4) 0.037(4)
C21 0.088(4) 0.050(3) 0.041(3) 0.007(2) 0.032(3) 0.020(3)
C22 0.046(3) 0.066(3) 0.057(3) 0.011(3) 0.017(2) 0.018(3)
C23 0.099(5) 0.067(4) 0.109(6) 0.003(4) 0.034(4) -0.015(4)
C24 0.112(6) 0.067(4) 0.067(4) 0.014(3) 0.000(4) -0.006(4)
C25 0.099(5) 0.068(4) 0.033(3) 0.006(2) 0.018(3) 0.028(3)
C26 0.242(12) 0.172(9) 0.102(6) 0.091(6) 0.108(7) 0.152(9)
C27 0.118(7) 0.096(6) 0.167(9) -0.042(6) -0.051(6) 0.023(6)
C28 0.033(2) 0.035(2) 0.034(2) 0.0005(18) 0.0061(18) -0.0012(19)
C29 0.060(3) 0.029(2) 0.069(3) 0.007(2) 0.005(3) -0.001(2)
C30 0.055(3) 0.031(3) 0.067(3) 0.008(2) 0.004(3) -0.007(2)
C31 0.037(3) 0.040(3) 0.050(3) 0.005(2) 0.009(2) 0.004(2)
C32 0.033(2) 0.042(3) 0.051(3) 0.008(2) 0.008(2) 0.003(2)
C33 0.038(3) 0.066(3) 0.058(3) 0.012(3) 0.008(2) -0.003(2)
C34 0.039(3) 0.074(4) 0.082(4) 0.020(3) 0.018(3) 0.001(3)
C35 0.068(4) 0.074(4) 0.085(4) 0.025(3) 0.047(4) 0.019(3)
C36 0.055(3) 0.052(3) 0.061(3) 0.011(2) 0.027(3) 0.008(3)
C37 0.044(3) 0.061(3) 0.047(3) 0.000(2) 0.013(2) -0.002(2)
C39 0.079(10) 0.070(9) 0.054(8) -0.011(7) 0.020(7) 0.002(7)
C38 0.093(12) 0.067(10) 0.067(12) 0.021(7) 0.058(10) 0.009(8)
C39A 0.088(11) 0.070(9) 0.082(10) 0.001(8) 0.044(8) -0.002(8)
C38A 0.103(15) 0.16(3) 0.073(15) 0.065(16) 0.043(13) 0.079(18)
C40 0.087(4) 0.071(4) 0.057(3) 0.004(3) 0.033(3) 0.009(3)
C41 0.215(11) 0.126(7) 0.090(6) -0.011(5) 0.063(6) 0.070(7)
C42 0.103(5) 0.089(5) 0.065(4) 0.021(3) 0.034(4) 0.016(4)
C43 0.034(2) 0.044(3) 0.045(3) -0.001(2) 0.005(2) -0.005(2)
C44 0.037(3) 0.054(3) 0.039(3) -0.004(2) 0.005(2) 0.001(2)
C45 0.048(3) 0.077(4) 0.043(3) 0.001(3) 0.006(2) 0.002(3)
C46 0.035(3) 0.106(5) 0.063(4) 0.010(3) 0.007(3) 0.010(3)
C47 0.038(3) 0.095(4) 0.056(3) 0.011(3) 0.018(2) 0.005(3)
C48 0.043(3) 0.061(3) 0.045(3) 0.004(2) 0.015(2) -0.010(2)
C49 0.064(3) 0.068(4) 0.042(3) -0.006(2) 0.011(2) 0.008(3)
C50 0.128(6) 0.089(5) 0.096(5) 0.013(4) 0.076(5) 0.014(5)
C51 0.133(7) 0.092(5) 0.093(5) -0.041(4) 0.042(5) -0.012(5)
C52 0.056(3) 0.072(4) 0.043(3) 0.012(3) 0.015(2) -0.004(3)
C53 0.110(5) 0.087(5) 0.052(3) -0.003(3) 0.026(3) -0.016(4)
C54 0.125(6) 0.137(7) 0.062(4) 0.022(4) 0.027(4) -0.061(5)
C55 0.091(4) 0.048(3) 0.051(3) 0.009(2) 0.022(3) 0.004(3)
C56 0.106(5) 0.077(4) 0.050(3) -0.003(3) 0.040(3) -0.022(4)
C57 0.059(3) 0.063(3) 0.062(3) 0.000(3) 0.032(3) -0.014(3)
C58 0.046(3) 0.075(4) 0.065(3) 0.022(3) 0.008(3) 0.011(3)
C59 0.056(3) 0.081(4) 0.051(3) -0.019(3) 0.013(3) -0.011(3)
C60 0.041(3) 0.061(3) 0.049(3) 0.001(2) 0.013(2) -0.001(2)
C61 0.058(3) 0.062(3) 0.055(3) -0.007(3) 0.032(3) 0.005(3)
C62 0.190(8) 0.072(4) 0.084(5) -0.035(4) 0.080(5) -0.057(5)
C63 0.160(8) 0.120(6) 0.096(5) 0.038(5) 0.076(5) 0.091(6)
C64 0.072(4) 0.049(3) 0.076(4) -0.001(3) 0.038(3) -0.009(3)
C65 0.073(4) 0.060(3) 0.048(3) 0.015(2) 0.022(3) 0.012(3)
C66 0.054(3) 0.057(3) 0.055(3) 0.003(2) 0.031(2) -0.006(2)
C67 0.042(3) 0.073(4) 0.052(3) -0.007(3) 0.010(2) 0.007(3)
C68 0.053(3) 0.082(4) 0.042(3) 0.004(3) 0.005(2) -0.003(3)
C69 0.056(3) 0.069(4) 0.069(4) -0.017(3) 0.021(3) -0.015(3)
C70 0.091(4) 0.065(4) 0.058(3) -0.008(3) 0.042(3) 0.004(3)
C71 0.090(4) 0.047(3) 0.073(4) -0.006(3) 0.039(3) -0.005(3)
C72 0.056(3) 0.060(3) 0.065(3) 0.001(3) 0.026(3) 0.016(3)
 
_geom_special_details
;
 All esds (except the esd in the dihedral angle between two l.s. planes)
 are estimated using the full covariance matrix.  The cell esds are taken
 into account individually in the estimation of esds in distances, angles
 and torsion angles; correlations between esds in cell parameters are only
 used when they are defined by crystal symmetry.  An approximate (isotropic)
 treatment of cell esds is used for estimating esds involving l.s. planes.
;
 
loop_
 _geom_bond_atom_site_label_1
 _geom_bond_atom_site_label_2
 _geom_bond_distance
 _geom_bond_site_symmetry_2
 _geom_bond_publ_flag
Na C28 2.446(5) . ?
Na C1 2.451(4) . ?
Mg N7 2.026(4) . ?
Mg N5 2.027(3) . ?
Mg N6 2.037(4) . ?
Mg Si2 3.2020(17) . ?
Mg Si1 3.2067(18) . ?
Mg Si4 3.2082(19) . ?
Mg Si6 3.2107(18) . ?
Mg Si5 3.2123(18) . ?
Mg Si3 3.2147(19) . ?
Si1 N5 1.693(4) . ?
Si1 C57 1.866(5) . ?
Si1 C56 1.881(5) . ?
Si1 C55 1.891(5) . ?
Si2 N5 1.699(4) . ?
Si2 C60 1.869(5) . ?
Si2 C59 1.876(5) . ?
Si2 C58 1.880(5) . ?
Si3 N6 1.698(4) . ?
Si3 C61 1.852(5) . ?
Si3 C62 1.880(7) . ?
Si3 C63 1.895(7) . ?
Si4 N6 1.695(4) . ?
Si4 C66 1.867(5) . ?
Si4 C65 1.884(5) . ?
Si4 C64 1.892(5) . ?
Si5 N7 1.698(4) . ?
Si5 C67 1.865(5) . ?
Si5 C68 1.876(5) . ?
Si5 C69 1.879(5) . ?
Si6 N7 1.699(4) . ?
Si6 C72 1.862(5) . ?
Si6 C71 1.870(6) . ?
Si6 C70 1.879(5) . ?
N1 C1 1.361(5) . ?
N1 C3 1.382(5) . ?
N1 C4 1.455(5) . ?
N2 C1 1.370(5) . ?
N2 C2 1.390(5) . ?
N2 C16 1.441(5) . ?
N3 C28 1.359(5) . ?
N3 C30 1.380(6) . ?
N3 C43 1.453(6) . ?
N4 C28 1.351(5) . ?
N4 C29 1.393(6) . ?
N4 C31 1.451(6) . ?
C2 C3 1.326(6) . ?
C2 H2 0.9500 . ?
C3 H3 0.9500 . ?
C4 C5 1.389(7) . ?
C4 C9 1.397(7) . ?
C5 C6 1.410(8) . ?
C5 C10 1.508(8) . ?
C6 C7 1.376(9) . ?
C6 H6 0.9500 . ?
C7 C8 1.387(9) . ?
C7 H7 0.9500 . ?
C8 C9 1.386(7) . ?
C8 H8 0.9500 . ?
C9 C13 1.509(8) . ?
C10 C11 1.511(10) . ?
C10 C12 1.549(9) . ?
C10 H10 1.0000 . ?
C11 H11A 0.9800 . ?
C11 H11B 0.9800 . ?
C11 H11C 0.9800 . ?
C12 H12A 0.9800 . ?
C12 H12B 0.9800 . ?
C12 H12C 0.9800 . ?
C13 C15 1.536(9) . ?
C13 C14 1.538(8) . ?
C13 H13 1.0000 . ?
C14 H14A 0.9800 . ?
C14 H14B 0.9800 . ?
C14 H14C 0.9800 . ?
C15 H15A 0.9800 . ?
C15 H15B 0.9800 . ?
C15 H15C 0.9800 . ?
C16 C17 1.399(7) . ?
C16 C21 1.411(6) . ?
C17 C18 1.402(7) . ?
C17 C22 1.510(7) . ?
C18 C19 1.358(9) . ?
C18 H18 0.9500 . ?
C19 C20 1.391(9) . ?
C19 H19 0.9500 . ?
C20 C21 1.395(8) . ?
C20 H20 0.9500 . ?
C21 C25 1.491(8) . ?
C22 C23 1.501(8) . ?
C22 C24 1.515(8) . ?
C22 H22 1.0000 . ?
C23 H23A 0.9800 . ?
C23 H23B 0.9800 . ?
C23 H23C 0.9800 . ?
C24 H24A 0.9800 . ?
C24 H24B 0.9800 . ?
C24 H24C 0.9800 . ?
C25 C27 1.519(11) . ?
C25 C26 1.529(9) . ?
C25 H25 1.0000 . ?
C26 H26A 0.9800 . ?
C26 H26B 0.9800 . ?
C26 H26C 0.9800 . ?
C27 H27A 0.9800 . ?
C27 H27B 0.9800 . ?
C27 H27C 0.9800 . ?
C29 C30 1.340(7) . ?
C29 H29 0.9500 . ?
C30 H30 0.9500 . ?
C31 C36 1.395(7) . ?
C31 C32 1.401(6) . ?
C32 C33 1.381(7) . ?
C32 C37 1.506(7) . ?
C33 C34 1.373(8) . ?
C33 H33 0.9500 . ?
C34 C35 1.365(8) . ?
C34 H34 0.9500 . ?
C35 C36 1.397(8) . ?
C35 H35 0.9500 . ?
C36 C40 1.510(8) . ?
C37 C38A 1.48(2) . ?
C37 C39A 1.522(15) . ?
C37 C39 1.548(13) . ?
C37 C38 1.56(2) . ?
C37 H37 1.0000 . ?
C37 H37A 1.0000 . ?
C39 H39A 0.9800 . ?
C39 H39B 0.9800 . ?
C39 H39C 0.9800 . ?
C38 H38A 0.9800 . ?
C38 H38B 0.9800 . ?
C38 H38C 0.9800 . ?
C39A H39D 0.9800 . ?
C39A H39E 0.9800 . ?
C39A H39F 0.9800 . ?
C38A H38D 0.9800 . ?
C38A H38E 0.9800 . ?
C38A H38F 0.9800 . ?
C40 C42 1.520(8) . ?
C40 C41 1.545(10) . ?
C40 H40 1.0000 . ?
C41 H41A 0.9800 . ?
C41 H41B 0.9800 . ?
C41 H41C 0.9800 . ?
C42 H42A 0.9800 . ?
C42 H42B 0.9800 . ?
C42 H42C 0.9800 . ?
C43 C44 1.398(6) . ?
C43 C48 1.402(7) . ?
C44 C45 1.395(7) . ?
C44 C49 1.516(7) . ?
C45 C46 1.378(8) . ?
C45 H45 0.9500 . ?
C46 C47 1.379(8) . ?
C46 H46 0.9500 . ?
C47 C48 1.381(7) . ?
C47 H47 0.9500 . ?
C48 C52 1.512(7) . ?
C49 C50 1.506(8) . ?
C49 C51 1.527(8) . ?
C49 H49 1.0000 . ?
C50 H50A 0.9800 . ?
C50 H50B 0.9800 . ?
C50 H50C 0.9800 . ?
C51 H51A 0.9800 . ?
C51 H51B 0.9800 . ?
C51 H51C 0.9800 . ?
C52 C54 1.496(8) . ?
C52 C53 1.529(8) . ?
C52 H52 1.0000 . ?
C53 H53A 0.9800 . ?
C53 H53B 0.9800 . ?
C53 H53C 0.9800 . ?
C54 H54A 0.9800 . ?
C54 H54B 0.9800 . ?
C54 H54C 0.9800 . ?
C55 H55A 0.9800 . ?
C55 H55B 0.9800 . ?
C55 H55C 0.9800 . ?
C56 H56A 0.9800 . ?
C56 H56B 0.9800 . ?
C56 H56C 0.9800 . ?
C57 H57A 0.9800 . ?
C57 H57B 0.9800 . ?
C57 H57C 0.9800 . ?
C58 H58A 0.9800 . ?
C58 H58B 0.9800 . ?
C58 H58C 0.9800 . ?
C59 H59A 0.9800 . ?
C59 H59B 0.9800 . ?
C59 H59C 0.9800 . ?
C60 H60A 0.9800 . ?
C60 H60B 0.9800 . ?
C60 H60C 0.9800 . ?
C61 H61A 0.9800 . ?
C61 H61B 0.9800 . ?
C61 H61C 0.9800 . ?
C62 H62A 0.9800 . ?
C62 H62B 0.9800 . ?
C62 H62C 0.9800 . ?
C63 H63A 0.9800 . ?
C63 H63B 0.9800 . ?
C63 H63C 0.9800 . ?
C64 H64A 0.9800 . ?
C64 H64B 0.9800 . ?
C64 H64C 0.9800 . ?
C65 H65A 0.9800 . ?
C65 H65B 0.9800 . ?
C65 H65C 0.9800 . ?
C66 H66A 0.9800 . ?
C66 H66B 0.9800 . ?
C66 H66C 0.9800 . ?
C67 H67A 0.9800 . ?
C67 H67B 0.9800 . ?
C67 H67C 0.9800 . ?
C68 H68A 0.9800 . ?
C68 H68B 0.9800 . ?
C68 H68C 0.9800 . ?
C69 H69A 0.9800 . ?
C69 H69B 0.9800 . ?
C69 H69C 0.9800 . ?
C70 H70A 0.9800 . ?
C70 H70B 0.9800 . ?
C70 H70C 0.9800 . ?
C71 H71A 0.9800 . ?
C71 H71B 0.9800 . ?
C71 H71C 0.9800 . ?
C72 H72A 0.9800 . ?
C72 H72B 0.9800 . ?
C72 H72C 0.9800 . ?
 
loop_
 _geom_angle_atom_site_label_1
 _geom_angle_atom_site_label_2
 _geom_angle_atom_site_label_3
 _geom_angle
 _geom_angle_site_symmetry_1
 _geom_angle_site_symmetry_3
 _geom_angle_publ_flag
C28 Na C1 168.94(18) . . ?
N7 Mg N5 119.42(15) . . ?
N7 Mg N6 120.72(15) . . ?
N5 Mg N6 119.86(15) . . ?
N7 Mg Si2 134.42(12) . . ?
N5 Mg Si2 27.89(10) . . ?
N6 Mg Si2 100.26(11) . . ?
N7 Mg Si1 101.13(11) . . ?
N5 Mg Si1 27.54(10) . . ?
N6 Mg Si1 132.86(11) . . ?
Si2 Mg Si1 55.40(4) . . ?
N7 Mg Si4 100.89(11) . . ?
N5 Mg Si4 135.13(11) . . ?
N6 Mg Si4 27.74(10) . . ?
Si2 Mg Si4 108.47(5) . . ?
Si1 Mg Si4 157.92(6) . . ?
N7 Mg Si6 27.61(10) . . ?
N5 Mg Si6 99.47(11) . . ?
N6 Mg Si6 136.25(11) . . ?
Si2 Mg Si6 107.80(5) . . ?
Si1 Mg Si6 90.88(5) . . ?
Si4 Mg Si6 109.61(5) . . ?
N7 Mg Si5 27.56(10) . . ?
N5 Mg Si5 134.75(12) . . ?
N6 Mg Si5 100.68(11) . . ?
Si2 Mg Si5 159.06(6) . . ?
Si1 Mg Si5 108.90(5) . . ?
Si4 Mg Si5 90.12(5) . . ?
Si6 Mg Si5 55.17(4) . . ?
N7 Mg Si3 134.30(12) . . ?
N5 Mg Si3 100.97(11) . . ?
N6 Mg Si3 27.65(10) . . ?
Si2 Mg Si3 91.27(5) . . ?
Si1 Mg Si3 106.56(5) . . ?
Si4 Mg Si3 55.36(4) . . ?
Si6 Mg Si3 159.48(6) . . ?
Si5 Mg Si3 107.61(5) . . ?
N5 Si1 C57 112.4(2) . . ?
N5 Si1 C56 113.1(2) . . ?
C57 Si1 C56 105.6(3) . . ?
N5 Si1 C55 113.5(2) . . ?
C57 Si1 C55 106.3(3) . . ?
C56 Si1 C55 105.3(3) . . ?
N5 Si1 Mg 33.63(12) . . ?
C57 Si1 Mg 79.08(17) . . ?
C56 Si1 Mg 129.6(2) . . ?
C55 Si1 Mg 121.83(18) . . ?
N5 Si2 C60 111.51(19) . . ?
N5 Si2 C59 113.9(2) . . ?
C60 Si2 C59 106.1(3) . . ?
N5 Si2 C58 113.1(2) . . ?
C60 Si2 C58 106.5(2) . . ?
C59 Si2 C58 105.2(3) . . ?
N5 Si2 Mg 33.91(12) . . ?
C60 Si2 Mg 79.18(15) . . ?
C59 Si2 Mg 115.92(19) . . ?
C58 Si2 Mg 135.2(2) . . ?
N6 Si3 C61 112.1(2) . . ?
N6 Si3 C62 114.2(3) . . ?
C61 Si3 C62 106.4(3) . . ?
N6 Si3 C63 113.3(3) . . ?
C61 Si3 C63 104.5(3) . . ?
C62 Si3 C63 105.6(4) . . ?
N6 Si3 Mg 33.82(12) . . ?
C61 Si3 Mg 78.42(16) . . ?
C62 Si3 Mg 124.1(3) . . ?
C63 Si3 Mg 127.6(3) . . ?
N6 Si4 C66 111.6(2) . . ?
N6 Si4 C65 112.9(2) . . ?
C66 Si4 C65 106.9(2) . . ?
N6 Si4 C64 114.1(2) . . ?
C66 Si4 C64 105.5(2) . . ?
C65 Si4 C64 105.2(3) . . ?
N6 Si4 Mg 33.99(12) . . ?
C66 Si4 Mg 77.87(16) . . ?
C65 Si4 Mg 121.38(19) . . ?
C64 Si4 Mg 130.38(19) . . ?
N7 Si5 C67 111.9(2) . . ?
N7 Si5 C68 113.9(2) . . ?
C67 Si5 C68 106.9(3) . . ?
N7 Si5 C69 112.6(2) . . ?
C67 Si5 C69 106.0(3) . . ?
C68 Si5 C69 104.9(3) . . ?
N7 Si5 Mg 33.50(12) . . ?
C67 Si5 Mg 79.65(16) . . ?
C68 Si5 Mg 117.75(18) . . ?
C69 Si5 Mg 133.4(2) . . ?
N7 Si6 C72 111.1(2) . . ?
N7 Si6 C71 114.8(2) . . ?
C72 Si6 C71 105.6(3) . . ?
N7 Si6 C70 113.6(2) . . ?
C72 Si6 C70 105.8(3) . . ?
C71 Si6 C70 105.1(3) . . ?
N7 Si6 Mg 33.55(12) . . ?
C72 Si6 Mg 78.66(17) . . ?
C71 Si6 Mg 118.06(19) . . ?
C70 Si6 Mg 133.79(19) . . ?
C1 N1 C3 112.3(3) . . ?
C1 N1 C4 123.5(3) . . ?
C3 N1 C4 124.2(4) . . ?
C1 N2 C2 111.9(3) . . ?
C1 N2 C16 122.4(3) . . ?
C2 N2 C16 125.6(4) . . ?
C28 N3 C30 113.2(4) . . ?
C28 N3 C43 123.7(4) . . ?
C30 N3 C43 123.1(4) . . ?
C28 N4 C29 112.5(4) . . ?
C28 N4 C31 123.6(4) . . ?
C29 N4 C31 123.7(4) . . ?
Si1 N5 Si2 122.9(2) . . ?
Si1 N5 Mg 118.83(19) . . ?
Si2 N5 Mg 118.20(19) . . ?
Si4 N6 Si3 123.1(2) . . ?
Si4 N6 Mg 118.27(19) . . ?
Si3 N6 Mg 118.53(19) . . ?
Si5 N7 Si6 122.2(2) . . ?
Si5 N7 Mg 118.94(19) . . ?
Si6 N7 Mg 118.83(19) . . ?
N1 C1 N2 102.3(3) . . ?
N1 C1 Na 143.2(3) . . ?
N2 C1 Na 114.4(3) . . ?
C3 C2 N2 106.5(4) . . ?
C3 C2 H2 126.8 . . ?
N2 C2 H2 126.8 . . ?
C2 C3 N1 107.1(4) . . ?
C2 C3 H3 126.5 . . ?
N1 C3 H3 126.5 . . ?
C5 C4 C9 123.3(4) . . ?
C5 C4 N1 118.2(4) . . ?
C9 C4 N1 118.4(4) . . ?
C4 C5 C6 116.3(5) . . ?
C4 C5 C10 122.8(5) . . ?
C6 C5 C10 120.9(5) . . ?
C7 C6 C5 121.9(6) . . ?
C7 C6 H6 119.0 . . ?
C5 C6 H6 119.0 . . ?
C6 C7 C8 119.5(5) . . ?
C6 C7 H7 120.3 . . ?
C8 C7 H7 120.3 . . ?
C9 C8 C7 121.3(5) . . ?
C9 C8 H8 119.4 . . ?
C7 C8 H8 119.4 . . ?
C8 C9 C4 117.6(5) . . ?
C8 C9 C13 119.6(5) . . ?
C4 C9 C13 122.8(4) . . ?
C5 C10 C11 110.6(5) . . ?
C5 C10 C12 111.6(6) . . ?
C11 C10 C12 111.0(6) . . ?
C5 C10 H10 107.8 . . ?
C11 C10 H10 107.8 . . ?
C12 C10 H10 107.8 . . ?
C10 C11 H11A 109.5 . . ?
C10 C11 H11B 109.5 . . ?
H11A C11 H11B 109.5 . . ?
C10 C11 H11C 109.5 . . ?
H11A C11 H11C 109.5 . . ?
H11B C11 H11C 109.5 . . ?
C10 C12 H12A 109.5 . . ?
C10 C12 H12B 109.5 . . ?
H12A C12 H12B 109.5 . . ?
C10 C12 H12C 109.5 . . ?
H12A C12 H12C 109.5 . . ?
H12B C12 H12C 109.5 . . ?
C9 C13 C15 109.7(5) . . ?
C9 C13 C14 114.6(5) . . ?
C15 C13 C14 109.4(5) . . ?
C9 C13 H13 107.6 . . ?
C15 C13 H13 107.6 . . ?
C14 C13 H13 107.6 . . ?
C13 C14 H14A 109.5 . . ?
C13 C14 H14B 109.5 . . ?
H14A C14 H14B 109.5 . . ?
C13 C14 H14C 109.5 . . ?
H14A C14 H14C 109.5 . . ?
H14B C14 H14C 109.5 . . ?
C13 C15 H15A 109.5 . . ?
C13 C15 H15B 109.5 . . ?
H15A C15 H15B 109.5 . . ?
C13 C15 H15C 109.5 . . ?
H15A C15 H15C 109.5 . . ?
H15B C15 H15C 109.5 . . ?
C17 C16 C21 124.0(4) . . ?
C17 C16 N2 118.2(4) . . ?
C21 C16 N2 117.8(4) . . ?
C16 C17 C18 116.4(5) . . ?
C16 C17 C22 122.6(4) . . ?
C18 C17 C22 121.0(5) . . ?
C19 C18 C17 121.7(6) . . ?
C19 C18 H18 119.2 . . ?
C17 C18 H18 119.2 . . ?
C18 C19 C20 120.4(5) . . ?
C18 C19 H19 119.8 . . ?
C20 C19 H19 119.8 . . ?
C19 C20 C21 121.7(5) . . ?
C19 C20 H20 119.1 . . ?
C21 C20 H20 119.1 . . ?
C20 C21 C16 115.6(5) . . ?
C20 C21 C25 121.2(5) . . ?
C16 C21 C25 123.2(4) . . ?
C23 C22 C17 110.4(5) . . ?
C23 C22 C24 110.5(5) . . ?
C17 C22 C24 113.0(5) . . ?
C23 C22 H22 107.6 . . ?
C17 C22 H22 107.6 . . ?
C24 C22 H22 107.6 . . ?
C22 C23 H23A 109.5 . . ?
C22 C23 H23B 109.5 . . ?
H23A C23 H23B 109.5 . . ?
C22 C23 H23C 109.5 . . ?
H23A C23 H23C 109.5 . . ?
H23B C23 H23C 109.5 . . ?
C22 C24 H24A 109.5 . . ?
C22 C24 H24B 109.5 . . ?
H24A C24 H24B 109.5 . . ?
C22 C24 H24C 109.5 . . ?
H24A C24 H24C 109.5 . . ?
H24B C24 H24C 109.5 . . ?
C21 C25 C27 110.9(5) . . ?
C21 C25 C26 112.7(6) . . ?
C27 C25 C26 111.6(8) . . ?
C21 C25 H25 107.1 . . ?
C27 C25 H25 107.1 . . ?
C26 C25 H25 107.1 . . ?
C25 C26 H26A 109.5 . . ?
C25 C26 H26B 109.5 . . ?
H26A C26 H26B 109.5 . . ?
C25 C26 H26C 109.5 . . ?
H26A C26 H26C 109.5 . . ?
H26B C26 H26C 109.5 . . ?
C25 C27 H27A 109.5 . . ?
C25 C27 H27B 109.5 . . ?
H27A C27 H27B 109.5 . . ?
C25 C27 H27C 109.5 . . ?
H27A C27 H27C 109.5 . . ?
H27B C27 H27C 109.5 . . ?
N4 C28 N3 102.1(3) . . ?
N4 C28 Na 137.3(3) . . ?
N3 C28 Na 120.4(3) . . ?
C30 C29 N4 106.2(4) . . ?
C30 C29 H29 126.9 . . ?
N4 C29 H29 126.9 . . ?
C29 C30 N3 105.9(4) . . ?
C29 C30 H30 127.1 . . ?
N3 C30 H30 127.1 . . ?
C36 C31 C32 123.6(4) . . ?
C36 C31 N4 118.4(4) . . ?
C32 C31 N4 118.0(4) . . ?
C33 C32 C31 116.7(5) . . ?
C33 C32 C37 120.6(4) . . ?
C31 C32 C37 122.7(4) . . ?
C34 C33 C32 121.6(5) . . ?
C34 C33 H33 119.2 . . ?
C32 C33 H33 119.2 . . ?
C35 C34 C33 120.2(5) . . ?
C35 C34 H34 119.9 . . ?
C33 C34 H34 119.9 . . ?
C34 C35 C36 121.9(5) . . ?
C34 C35 H35 119.0 . . ?
C36 C35 H35 119.0 . . ?
C31 C36 C35 115.9(5) . . ?
C31 C36 C40 121.5(5) . . ?
C35 C36 C40 122.6(5) . . ?
C38A C37 C32 118.6(11) . . ?
C38A C37 C39A 111.3(12) . . ?
C32 C37 C39A 109.3(7) . . ?
C38A C37 C39 80.5(12) . . ?
C32 C37 C39 112.8(7) . . ?
C32 C37 C38 107.4(8) . . ?
C39A C37 C38 134.8(10) . . ?
C39 C37 C38 105.3(10) . . ?
C38A C37 H37 120.2 . . ?
C32 C37 H37 110.4 . . ?
C39A C37 H37 80.2 . . ?
C39 C37 H37 110.4 . . ?
C38 C37 H37 110.4 . . ?
C38A C37 H37A 105.5 . . ?
C32 C37 H37A 105.5 . . ?
C39A C37 H37A 105.5 . . ?
C39 C37 H37A 132.1 . . ?
C38 C37 H37A 88.9 . . ?
C37 C39 H39A 109.5 . . ?
C37 C39 H39B 109.5 . . ?
H39A C39 H39B 109.5 . . ?
C37 C39 H39C 109.5 . . ?
H39A C39 H39C 109.5 . . ?
H39B C39 H39C 109.5 . . ?
C37 C38 H38A 109.5 . . ?
C37 C38 H38B 109.5 . . ?
H38A C38 H38B 109.5 . . ?
C37 C38 H38C 109.5 . . ?
H38A C38 H38C 109.5 . . ?
H38B C38 H38C 109.5 . . ?
C37 C39A H39D 109.5 . . ?
C37 C39A H39E 109.5 . . ?
H39D C39A H39E 109.5 . . ?
C37 C39A H39F 109.5 . . ?
H39D C39A H39F 109.5 . . ?
H39E C39A H39F 109.5 . . ?
C37 C38A H38D 109.5 . . ?
C37 C38A H38E 109.5 . . ?
H38D C38A H38E 109.5 . . ?
C37 C38A H38F 109.5 . . ?
H38D C38A H38F 109.5 . . ?
H38E C38A H38F 109.5 . . ?
C36 C40 C42 111.5(5) . . ?
C36 C40 C41 111.4(6) . . ?
C42 C40 C41 108.0(6) . . ?
C36 C40 H40 108.6 . . ?
C42 C40 H40 108.6 . . ?
C41 C40 H40 108.6 . . ?
C40 C41 H41A 109.5 . . ?
C40 C41 H41B 109.5 . . ?
H41A C41 H41B 109.5 . . ?
C40 C41 H41C 109.5 . . ?
H41A C41 H41C 109.5 . . ?
H41B C41 H41C 109.5 . . ?
C40 C42 H42A 109.5 . . ?
C40 C42 H42B 109.5 . . ?
H42A C42 H42B 109.5 . . ?
C40 C42 H42C 109.5 . . ?
H42A C42 H42C 109.5 . . ?
H42B C42 H42C 109.5 . . ?
C44 C43 C48 123.8(4) . . ?
C44 C43 N3 118.3(4) . . ?
C48 C43 N3 117.9(4) . . ?
C45 C44 C43 116.8(5) . . ?
C45 C44 C49 120.5(4) . . ?
C43 C44 C49 122.7(4) . . ?
C46 C45 C44 120.6(5) . . ?
C46 C45 H45 119.7 . . ?
C44 C45 H45 119.7 . . ?
C45 C46 C47 120.8(5) . . ?
C45 C46 H46 119.6 . . ?
C47 C46 H46 119.6 . . ?
C46 C47 C48 121.6(5) . . ?
C46 C47 H47 119.2 . . ?
C48 C47 H47 119.2 . . ?
C47 C48 C43 116.4(4) . . ?
C47 C48 C52 120.8(5) . . ?
C43 C48 C52 122.8(5) . . ?
C50 C49 C44 112.3(5) . . ?
C50 C49 C51 111.2(5) . . ?
C44 C49 C51 109.8(5) . . ?
C50 C49 H49 107.8 . . ?
C44 C49 H49 107.8 . . ?
C51 C49 H49 107.8 . . ?
C49 C50 H50A 109.5 . . ?
C49 C50 H50B 109.5 . . ?
H50A C50 H50B 109.5 . . ?
C49 C50 H50C 109.5 . . ?
H50A C50 H50C 109.5 . . ?
H50B C50 H50C 109.5 . . ?
C49 C51 H51A 109.5 . . ?
C49 C51 H51B 109.5 . . ?
H51A C51 H51B 109.5 . . ?
C49 C51 H51C 109.5 . . ?
H51A C51 H51C 109.5 . . ?
H51B C51 H51C 109.5 . . ?
C54 C52 C48 112.1(5) . . ?
C54 C52 C53 110.7(6) . . ?
C48 C52 C53 111.3(5) . . ?
C54 C52 H52 107.5 . . ?
C48 C52 H52 107.5 . . ?
C53 C52 H52 107.5 . . ?
C52 C53 H53A 109.5 . . ?
C52 C53 H53B 109.5 . . ?
H53A C53 H53B 109.5 . . ?
C52 C53 H53C 109.5 . . ?
H53A C53 H53C 109.5 . . ?
H53B C53 H53C 109.5 . . ?
C52 C54 H54A 109.5 . . ?
C52 C54 H54B 109.5 . . ?
H54A C54 H54B 109.5 . . ?
C52 C54 H54C 109.5 . . ?
H54A C54 H54C 109.5 . . ?
H54B C54 H54C 109.5 . . ?
Si1 C55 H55A 109.5 . . ?
Si1 C55 H55B 109.5 . . ?
H55A C55 H55B 109.5 . . ?
Si1 C55 H55C 109.5 . . ?
H55A C55 H55C 109.5 . . ?
H55B C55 H55C 109.5 . . ?
Si1 C56 H56A 109.5 . . ?
Si1 C56 H56B 109.5 . . ?
H56A C56 H56B 109.5 . . ?
Si1 C56 H56C 109.5 . . ?
H56A C56 H56C 109.5 . . ?
H56B C56 H56C 109.5 . . ?
Si1 C57 H57A 109.5 . . ?
Si1 C57 H57B 109.5 . . ?
H57A C57 H57B 109.5 . . ?
Si1 C57 H57C 109.5 . . ?
H57A C57 H57C 109.5 . . ?
H57B C57 H57C 109.5 . . ?
Si2 C58 H58A 109.5 . . ?
Si2 C58 H58B 109.5 . . ?
H58A C58 H58B 109.5 . . ?
Si2 C58 H58C 109.5 . . ?
H58A C58 H58C 109.5 . . ?
H58B C58 H58C 109.5 . . ?
Si2 C59 H59A 109.5 . . ?
Si2 C59 H59B 109.5 . . ?
H59A C59 H59B 109.5 . . ?
Si2 C59 H59C 109.5 . . ?
H59A C59 H59C 109.5 . . ?
H59B C59 H59C 109.5 . . ?
Si2 C60 H60A 109.5 . . ?
Si2 C60 H60B 109.5 . . ?
H60A C60 H60B 109.5 . . ?
Si2 C60 H60C 109.5 . . ?
H60A C60 H60C 109.5 . . ?
H60B C60 H60C 109.5 . . ?
Si3 C61 H61A 109.5 . . ?
Si3 C61 H61B 109.5 . . ?
H61A C61 H61B 109.5 . . ?
Si3 C61 H61C 109.5 . . ?
H61A C61 H61C 109.5 . . ?
H61B C61 H61C 109.5 . . ?
Si3 C62 H62A 109.5 . . ?
Si3 C62 H62B 109.5 . . ?
H62A C62 H62B 109.5 . . ?
Si3 C62 H62C 109.5 . . ?
H62A C62 H62C 109.5 . . ?
H62B C62 H62C 109.5 . . ?
Si3 C63 H63A 109.5 . . ?
Si3 C63 H63B 109.5 . . ?
H63A C63 H63B 109.5 . . ?
Si3 C63 H63C 109.5 . . ?
H63A C63 H63C 109.5 . . ?
H63B C63 H63C 109.5 . . ?
Si4 C64 H64A 109.5 . . ?
Si4 C64 H64B 109.5 . . ?
H64A C64 H64B 109.5 . . ?
Si4 C64 H64C 109.5 . . ?
H64A C64 H64C 109.5 . . ?
H64B C64 H64C 109.5 . . ?
Si4 C65 H65A 109.5 . . ?
Si4 C65 H65B 109.5 . . ?
H65A C65 H65B 109.5 . . ?
Si4 C65 H65C 109.5 . . ?
H65A C65 H65C 109.5 . . ?
H65B C65 H65C 109.5 . . ?
Si4 C66 H66A 109.5 . . ?
Si4 C66 H66B 109.5 . . ?
H66A C66 H66B 109.5 . . ?
Si4 C66 H66C 109.5 . . ?
H66A C66 H66C 109.5 . . ?
H66B C66 H66C 109.5 . . ?
Si5 C67 H67A 109.5 . . ?
Si5 C67 H67B 109.5 . . ?
H67A C67 H67B 109.5 . . ?
Si5 C67 H67C 109.5 . . ?
H67A C67 H67C 109.5 . . ?
H67B C67 H67C 109.5 . . ?
Si5 C68 H68A 109.5 . . ?
Si5 C68 H68B 109.5 . . ?
H68A C68 H68B 109.5 . . ?
Si5 C68 H68C 109.5 . . ?
H68A C68 H68C 109.5 . . ?
H68B C68 H68C 109.5 . . ?
Si5 C69 H69A 109.5 . . ?
Si5 C69 H69B 109.5 . . ?
H69A C69 H69B 109.5 . . ?
Si5 C69 H69C 109.5 . . ?
H69A C69 H69C 109.5 . . ?
H69B C69 H69C 109.5 . . ?
Si6 C70 H70A 109.5 . . ?
Si6 C70 H70B 109.5 . . ?
H70A C70 H70B 109.5 . . ?
Si6 C70 H70C 109.5 . . ?
H70A C70 H70C 109.5 . . ?
H70B C70 H70C 109.5 . . ?
Si6 C71 H71A 109.5 . . ?
Si6 C71 H71B 109.5 . . ?
H71A C71 H71B 109.5 . . ?
Si6 C71 H71C 109.5 . . ?
H71A C71 H71C 109.5 . . ?
H71B C71 H71C 109.5 . . ?
Si6 C72 H72A 109.5 . . ?
Si6 C72 H72B 109.5 . . ?
H72A C72 H72B 109.5 . . ?
Si6 C72 H72C 109.5 . . ?
H72A C72 H72C 109.5 . . ?
H72B C72 H72C 109.5 . . ?
 
_diffrn_measured_fraction_theta_max    0.980
_diffrn_reflns_theta_full              25.06
_diffrn_measured_fraction_theta_full   0.980
_refine_diff_density_max    0.335
_refine_diff_density_min   -0.369
_refine_diff_density_rms    0.063

#=====>END

#======================================================
 
data_compound3
 
_audit_creation_method            SHELXL-97
_chemical_name_systematic
;
 ?
;
_chemical_name_common             ?
_chemical_melting_point           ?
_chemical_formula_moiety          
'C54 H72 K N4, C18 H54 Mg N3 Si6'
_chemical_formula_sum
 'C72 H126 K Mg N7 Si6'
_chemical_formula_weight          1321.75
 
loop_
 _atom_type_symbol
 _atom_type_description
 _atom_type_scat_dispersion_real
 _atom_type_scat_dispersion_imag
 _atom_type_scat_source
 'C'  'C'   0.0033   0.0016
 'International Tables Vol C Tables 4.2.6.8 and 6.1.1.4'
 'H'  'H'   0.0000   0.0000
 'International Tables Vol C Tables 4.2.6.8 and 6.1.1.4'
 'N'  'N'   0.0061   0.0033
 'International Tables Vol C Tables 4.2.6.8 and 6.1.1.4'
 'Si'  'Si'   0.0817   0.0704
 'International Tables Vol C Tables 4.2.6.8 and 6.1.1.4'
 'Mg'  'Mg'   0.0486   0.0363
 'International Tables Vol C Tables 4.2.6.8 and 6.1.1.4'
 'K'  'K'   0.2009   0.2494
 'International Tables Vol C Tables 4.2.6.8 and 6.1.1.4'
 
_symmetry_cell_setting            monoclinic
_symmetry_space_group_name_H-M    'C 2/c'
 
loop_
 _symmetry_equiv_pos_as_xyz
 'x, y, z'
 '-x, y, -z+1/2'
 'x+1/2, y+1/2, z'
 '-x+1/2, y+1/2, -z+1/2'
 '-x, -y, -z'
 'x, -y, z-1/2'
 '-x+1/2, -y+1/2, -z'
 'x+1/2, -y+1/2, z-1/2'
 
_cell_length_a                    30.6548(3)
_cell_length_b                    18.2165(3)
_cell_length_c                    17.4146(2)
_cell_angle_alpha                 90.00
_cell_angle_beta                  120.3760(10)
_cell_angle_gamma                 90.00
_cell_volume                      8389.76(19)
_cell_formula_units_Z             4
_cell_measurement_temperature     150(2)
_cell_measurement_reflns_used     55747
_cell_measurement_theta_min        2.910
_cell_measurement_theta_max        27.485
 
_exptl_crystal_description        block
_exptl_crystal_colour             colourless
_exptl_crystal_size_max           0.40
_exptl_crystal_size_mid           0.25
_exptl_crystal_size_min           0.20
_exptl_crystal_density_meas       ?
_exptl_crystal_density_diffrn     1.046
_exptl_crystal_density_method     'not measured'
_exptl_crystal_F_000              2888
_exptl_absorpt_coefficient_mu     0.196
_exptl_absorpt_correction_type    none
 
_exptl_special_details
;
 ?
;
 
_diffrn_ambient_temperature       150(2)
_diffrn_radiation_wavelength      0.71073
_diffrn_radiation_type            MoK\a
_diffrn_radiation_source          'fine-focus sealed tube'
_diffrn_radiation_monochromator   graphite
_diffrn_measurement_device_type   'Nonius Kappa CCD'
_diffrn_measurement_method        '287 2.0 degree images with \f and \w scans'
_diffrn_standards_number          0
_diffrn_standards_decay_%         0
_diffrn_reflns_number             79431
_diffrn_reflns_av_R_equivalents   0.0698
_diffrn_reflns_av_sigmaI/netI     0.0454
_diffrn_reflns_limit_h_min        -39
_diffrn_reflns_limit_h_max        39
_diffrn_reflns_limit_k_min        -23
_diffrn_reflns_limit_k_max        23
_diffrn_reflns_limit_l_min        -22
_diffrn_reflns_limit_l_max        20
_diffrn_reflns_theta_min          3.48
_diffrn_reflns_theta_max          27.46
_reflns_number_total              9576
_reflns_number_gt                 6840
_reflns_threshold_expression      >2sigma(I)
 
_computing_data_collection        'Collect (Nonius BV, 1997-2000)'
_computing_cell_refinement         'HKL Scalepack (Otwinski & Minor, 1997)'
_computing_data_reduction         
;
 DENZO-SCALEPACK Z. Otwinowski and W. Minor, " 
 Processing of X-ray Diffraction Data Collected in Oscillation Mode ", 
 Methods in Enzymology, Volume 276: Macromolecular Crystallography, 
 part A, p.307-326, 1997,C.W. Carter, Jr. & R. M. Sweet, Eds., Academic Press.
;
_computing_structure_solution     
; 
 SIR97- Altomare A., Burla M.C., Camalli M., Cascarano G.L., Giacovazzo C. , 
 Guagliardi A., Moliterni A.G.G., Polidori G.,Spagna R. 
 (1999) J. Appl. Cryst. 32, 115-119
;
_computing_structure_refinement   
;
 SHELXL97 -Program for Crystal Structure Analysis (Release 97-2). 
 Sheldrick, G.M., Instit\"ut f\"ur Anorganische Chemie der Universit\"at, 
 Tammanstrasse 4, D-3400 G\"ottingen, Germany, 1998 
;
_computing_molecular_graphics  

'ORTEP3 for Windows - Farrugia, L. J. J. Appl. Crystallogr. 1997, 30, 565'

_computing_publication_material    
;
 'WinGX publication routines, Farrugia, 
 L. J., J. Appl. Crystallogr., 1999, 32, 837-838
; 
 
_refine_special_details
;
 Refinement of F^2^ against ALL reflections.  The weighted R-factor wR and
 goodness of fit S are based on F^2^, conventional R-factors R are based
 on F, with F set to zero for negative F^2^. The threshold expression of
 F^2^ > 2sigma(F^2^) is used only for calculating R-factors(gt) etc. and is
 not relevant to the choice of reflections for refinement.  R-factors based
 on F^2^ are statistically about twice as large as those based on F, and R-
 factors based on ALL data will be even larger.
;
 
_refine_ls_structure_factor_coef  Fsqd
_refine_ls_matrix_type            full
_refine_ls_weighting_scheme       calc
_refine_ls_weighting_details
 'calc w=1/[\s^2^(Fo^2^)+(0.0563P)^2^+8.3127P] where P=(Fo^2^+2Fc^2^)/3'
_atom_sites_solution_primary      direct
_atom_sites_solution_secondary    difmap
_atom_sites_solution_hydrogens    geom
_refine_ls_hydrogen_treatment     constr
_refine_ls_extinction_method      none
_refine_ls_extinction_coef        ?
_refine_ls_number_reflns          9576
_refine_ls_number_parameters      437
_refine_ls_number_restraints      0
_refine_ls_R_factor_all           0.0801
_refine_ls_R_factor_gt            0.0495
_refine_ls_wR_factor_ref          0.1301
_refine_ls_wR_factor_gt           0.1136
_refine_ls_goodness_of_fit_ref    1.012
_refine_ls_restrained_S_all       1.012
_refine_ls_shift/su_max           0.001
_refine_ls_shift/su_mean          0.000
 
loop_
 _atom_site_label
 _atom_site_type_symbol
 _atom_site_fract_x
 _atom_site_fract_y
 _atom_site_fract_z
 _atom_site_U_iso_or_equiv
 _atom_site_adp_type
 _atom_site_occupancy
 _atom_site_symmetry_multiplicity
 _atom_site_calc_flag
 _atom_site_refinement_flags
 _atom_site_disorder_assembly
 _atom_site_disorder_group
Mg Mg 0.0000 0.76901(4) 0.7500 0.02627(18) Uani 1 2 d S . .
K K 0.2500 0.7500 0.5000 0.0581(2) Uani 1 2 d S . .
Si1 Si -0.08876(5) 0.73748(8) 0.54965(12) 0.0378(4) Uani 0.803(8) 1 d P A 1
C29 C -0.08926(16) 0.7865(2) 0.45457(19) 0.0599(11) Uani 0.803(8) 1 d P A 1
H29A H -0.0725 0.7561 0.4307 0.090 Uiso 0.803(8) 1 calc PR A 1
H29B H -0.0713 0.8334 0.4756 0.090 Uiso 0.803(8) 1 calc PR A 1
H29C H -0.1243 0.7958 0.4077 0.090 Uiso 0.803(8) 1 calc PR A 1
C30 C -0.13188(13) 0.6560(2) 0.4978(3) 0.0775(17) Uani 0.803(8) 1 d P A 1
H30A H -0.1335 0.6278 0.5442 0.116 Uiso 0.803(8) 1 calc PR A 1
H30B H -0.1187 0.6247 0.4684 0.116 Uiso 0.803(8) 1 calc PR A 1
H30C H -0.1658 0.6732 0.4538 0.116 Uiso 0.803(8) 1 calc PR A 1
Si1A Si -0.09415(16) 0.7099(7) 0.5746(5) 0.048(2) Uani 0.197(8) 1 d P A 2
C30A C -0.1289(6) 0.6239(11) 0.571(2) 0.107(11) Uani 0.197(8) 1 d P A 2
H30D H -0.1128 0.5815 0.5610 0.160 Uiso 0.197(8) 1 calc PR A 2
H30E H -0.1642 0.6274 0.5229 0.160 Uiso 0.197(8) 1 calc PR A 2
H30F H -0.1279 0.6179 0.6281 0.160 Uiso 0.197(8) 1 calc PR A 2
C29A C -0.1143(8) 0.729(2) 0.4563(10) 0.132(15) Uani 0.197(8) 1 d P A 2
H29D H -0.0975 0.7737 0.4528 0.198 Uiso 0.197(8) 1 calc PR A 2
H29E H -0.1510 0.7360 0.4221 0.198 Uiso 0.197(8) 1 calc PR A 2
H29F H -0.1049 0.6876 0.4317 0.198 Uiso 0.197(8) 1 calc PR A 2
Si2 Si 0.00403(2) 0.64622(3) 0.62009(4) 0.03824(14) Uani 1 1 d . A .
Si3 Si -0.01465(2) 0.92691(3) 0.81874(3) 0.03627(14) Uani 1 1 d . A .
N1 N 0.19734(5) 0.58893(7) 0.59933(9) 0.0252(3) Uani 1 1 d . . .
N2 N 0.15117(5) 0.64116(7) 0.47470(9) 0.0260(3) Uani 1 1 d . . .
N3 N -0.03003(6) 0.71266(8) 0.63410(10) 0.0327(3) Uani 1 1 d . A .
N4 N 0.0000 0.88062(11) 0.7500 0.0285(4) Uani 1 2 d S . .
C1 C 0.19947(6) 0.64144(9) 0.54565(11) 0.0265(4) Uani 1 1 d . . .
C2 C 0.14962(6) 0.55754(10) 0.56304(12) 0.0307(4) Uani 1 1 d . . .
H2 H 0.1396 0.5201 0.5889 0.037 Uiso 1 1 calc R . .
C3 C 0.12046(7) 0.59058(10) 0.48414(12) 0.0315(4) Uani 1 1 d . . .
H3 H 0.0858 0.5811 0.4431 0.038 Uiso 1 1 calc R . .
C4 C 0.13817(7) 0.68991(10) 0.40077(11) 0.0296(4) Uani 1 1 d . . .
C5 C 0.15069(7) 0.66863(10) 0.33687(11) 0.0328(4) Uani 1 1 d . . .
C6 C 0.14546(9) 0.72107(12) 0.27450(13) 0.0465(5) Uani 1 1 d . . .
H6 H 0.1537 0.7084 0.2304 0.056 Uiso 1 1 calc R . .
C7 C 0.12847(11) 0.79114(13) 0.27552(15) 0.0585(7) Uani 1 1 d . . .
H7 H 0.1262 0.8266 0.2337 0.070 Uiso 1 1 calc R . .
C8 C 0.11475(10) 0.80961(12) 0.33731(15) 0.0533(6) Uani 1 1 d . . .
H8 H 0.1023 0.8575 0.3364 0.064 Uiso 1 1 calc R . .
C9 C 0.11882(8) 0.75944(11) 0.40098(12) 0.0378(4) Uani 1 1 d . . .
C10 C 0.16822(8) 0.59130(11) 0.33323(13) 0.0395(5) Uani 1 1 d . . .
H10 H 0.1812 0.5682 0.3930 0.047 Uiso 1 1 calc R . .
C11 C 0.12359(13) 0.54657(16) 0.2656(3) 0.0940(11) Uani 1 1 d . . .
H11A H 0.0976 0.5451 0.2826 0.141 Uiso 1 1 calc R . .
H11B H 0.1347 0.4965 0.2639 0.141 Uiso 1 1 calc R . .
H11C H 0.1096 0.5692 0.2067 0.141 Uiso 1 1 calc R . .
C12 C 0.21023(11) 0.58941(15) 0.3114(2) 0.0697(8) Uani 1 1 d . . .
H12A H 0.2224 0.5389 0.3163 0.105 Uiso 1 1 calc R . .
H12B H 0.2381 0.6209 0.3533 0.105 Uiso 1 1 calc R . .
H12C H 0.1973 0.6073 0.2506 0.105 Uiso 1 1 calc R . .
C13 C 0.10272(9) 0.78182(12) 0.46702(14) 0.0442(5) Uani 1 1 d . . .
H13 H 0.1060 0.7380 0.5042 0.053 Uiso 1 1 calc R . .
C14 C 0.13677(11) 0.84235(15) 0.52879(17) 0.0642(7) Uani 1 1 d . . .
H14A H 0.1720 0.8255 0.5600 0.096 Uiso 1 1 calc R . .
H14B H 0.1265 0.8543 0.5723 0.096 Uiso 1 1 calc R . .
H14C H 0.1337 0.8861 0.4937 0.096 Uiso 1 1 calc R . .
C15 C 0.04716(10) 0.80626(16) 0.41801(18) 0.0662(7) Uani 1 1 d . . .
H15A H 0.0433 0.8501 0.3825 0.099 Uiso 1 1 calc R . .
H15B H 0.0368 0.8176 0.4615 0.099 Uiso 1 1 calc R . .
H15C H 0.0259 0.7667 0.3788 0.099 Uiso 1 1 calc R . .
C16 C 0.24106(6) 0.56716(9) 0.68245(11) 0.0272(4) Uani 1 1 d . . .
C17 C 0.25107(7) 0.60297(10) 0.76099(11) 0.0305(4) Uani 1 1 d . . .
C18 C 0.29475(7) 0.58242(11) 0.83919(12) 0.0377(4) Uani 1 1 d . . .
H18 H 0.3027 0.6056 0.8936 0.045 Uiso 1 1 calc R . .
C19 C 0.32662(8) 0.52895(12) 0.83891(13) 0.0431(5) Uani 1 1 d . . .
H19 H 0.3565 0.5164 0.8928 0.052 Uiso 1 1 calc R . .
C20 C 0.31553(7) 0.49379(12) 0.76121(13) 0.0411(5) Uani 1 1 d . . .
H20 H 0.3375 0.4565 0.7623 0.049 Uiso 1 1 calc R . .
C21 C 0.27231(7) 0.51214(10) 0.68056(12) 0.0316(4) Uani 1 1 d . . .
C22 C 0.21695(8) 0.66380(11) 0.76026(13) 0.0399(5) Uani 1 1 d . . .
H22 H 0.1821 0.6547 0.7089 0.048 Uiso 1 1 calc R . .
C23 C 0.23490(11) 0.73769(13) 0.74513(17) 0.0596(7) Uani 1 1 d . . .
H23A H 0.2107 0.7760 0.7380 0.089 Uiso 1 1 calc R . .
H23B H 0.2374 0.7352 0.6913 0.089 Uiso 1 1 calc R . .
H23C H 0.2681 0.7493 0.7964 0.089 Uiso 1 1 calc R . .
C24 C 0.21366(9) 0.66627(15) 0.84484(15) 0.0554(6) Uani 1 1 d . . .
H24A H 0.2467 0.6797 0.8955 0.083 Uiso 1 1 calc R . .
H24B H 0.2037 0.6179 0.8554 0.083 Uiso 1 1 calc R . .
H24C H 0.1884 0.7028 0.8379 0.083 Uiso 1 1 calc R . .
C25 C 0.26111(7) 0.47462(11) 0.59421(12) 0.0364(4) Uani 1 1 d . . .
H25 H 0.2244 0.4818 0.5502 0.044 Uiso 1 1 calc R . .
C26 C 0.27094(9) 0.39240(12) 0.60567(15) 0.0526(6) Uani 1 1 d . . .
H26A H 0.3073 0.3835 0.6434 0.079 Uiso 1 1 calc R . .
H26B H 0.2587 0.3697 0.5473 0.079 Uiso 1 1 calc R . .
H26C H 0.2531 0.3710 0.6337 0.079 Uiso 1 1 calc R . .
C27 C 0.29103(10) 0.51091(15) 0.55621(16) 0.0594(6) Uani 1 1 d . . .
H27A H 0.2837 0.5636 0.5489 0.089 Uiso 1 1 calc R . .
H27B H 0.2813 0.4891 0.4983 0.089 Uiso 1 1 calc R . .
H27C H 0.3273 0.5033 0.5971 0.089 Uiso 1 1 calc R . .
C28 C -0.12135(8) 0.79691(14) 0.59440(16) 0.0520(6) Uani 1 1 d . . .
H28A H -0.1215 0.7716 0.6439 0.078 Uiso 0.803(8) 1 calc PR A 1
H28B H -0.1562 0.8064 0.5471 0.078 Uiso 0.803(8) 1 calc PR A 1
H28C H -0.1032 0.8436 0.6154 0.078 Uiso 0.803(8) 1 calc PR A 1
H28D H -0.1267 0.7894 0.6448 0.078 Uiso 0.197(8) 1 calc PR A 2
H28E H -0.1537 0.8085 0.5410 0.078 Uiso 0.197(8) 1 calc PR A 2
H28F H -0.0977 0.8376 0.6077 0.078 Uiso 0.197(8) 1 calc PR A 2
C31 C 0.00283(15) 0.6493(2) 0.5123(2) 0.1008(12) Uani 1 1 d . . .
H31A H -0.0303 0.6327 0.4644 0.151 Uiso 1 1 calc R A .
H31B H 0.0293 0.6170 0.5154 0.151 Uiso 1 1 calc R . .
H31C H 0.0089 0.6997 0.5003 0.151 Uiso 1 1 calc R . .
C32 C -0.01683(11) 0.55102(14) 0.6267(3) 0.0839(10) Uani 1 1 d . . .
H32A H -0.0197 0.5465 0.6800 0.126 Uiso 1 1 calc R A .
H32B H 0.0081 0.5156 0.6298 0.126 Uiso 1 1 calc R . .
H32C H -0.0498 0.5412 0.5737 0.126 Uiso 1 1 calc R . .
C33 C 0.07248(9) 0.65316(14) 0.7075(2) 0.0763(9) Uani 1 1 d . . .
H33A H 0.0854 0.7016 0.7043 0.114 Uiso 1 1 calc R A .
H33B H 0.0916 0.6150 0.6975 0.114 Uiso 1 1 calc R . .
H33C H 0.0763 0.6465 0.7664 0.114 Uiso 1 1 calc R . .
C34 C -0.05539(10) 1.01020(13) 0.7671(2) 0.0606(7) Uani 1 1 d . . .
H34A H -0.0366 1.0467 0.7539 0.091 Uiso 1 1 calc R A .
H34B H -0.0647 1.0312 0.8087 0.091 Uiso 1 1 calc R . .
H34C H -0.0861 0.9961 0.7119 0.091 Uiso 1 1 calc R . .
C35 C -0.05137(10) 0.86811(13) 0.85407(17) 0.0545(6) Uani 1 1 d . . .
H35A H -0.0828 0.8521 0.8014 0.082 Uiso 1 1 calc R A .
H35B H -0.0594 0.8963 0.8932 0.082 Uiso 1 1 calc R . .
H35C H -0.0312 0.8250 0.8861 0.082 Uiso 1 1 calc R . .
C36 C 0.04208(11) 0.96451(16) 0.92177(17) 0.0692(8) Uani 1 1 d . . .
H36A H 0.0647 0.9241 0.9560 0.104 Uiso 1 1 calc R A .
H36B H 0.0309 0.9901 0.9583 0.104 Uiso 1 1 calc R . .
H36C H 0.0602 0.9990 0.9045 0.104 Uiso 1 1 calc R . .
 
loop_
 _atom_site_aniso_label
 _atom_site_aniso_U_11
 _atom_site_aniso_U_22
 _atom_site_aniso_U_33
 _atom_site_aniso_U_23
 _atom_site_aniso_U_13
 _atom_site_aniso_U_12
Mg 0.0242(4) 0.0247(4) 0.0261(4) 0.000 0.0099(3) 0.000
K 0.0670(5) 0.0601(5) 0.0497(4) 0.0001(3) 0.0314(4) -0.0344(4)
Si1 0.0294(4) 0.0357(6) 0.0332(6) -0.0073(4) 0.0046(4) 0.0008(4)
C29 0.076(2) 0.063(2) 0.0288(14) 0.0002(14) 0.0176(15) 0.0229(18)
C30 0.0379(18) 0.058(2) 0.086(3) -0.020(2) -0.0059(18) -0.0076(15)
Si1A 0.0284(17) 0.076(5) 0.033(2) -0.021(3) 0.0110(15) -0.001(2)
C30A 0.056(9) 0.086(13) 0.20(3) -0.103(16) 0.080(14) -0.053(9)
C29A 0.090(15) 0.25(4) 0.036(8) 0.027(13) 0.016(9) 0.07(2)
Si2 0.0349(3) 0.0297(3) 0.0486(3) -0.0099(2) 0.0200(2) -0.0005(2)
Si3 0.0399(3) 0.0315(3) 0.0363(3) -0.0024(2) 0.0185(2) 0.0057(2)
N1 0.0265(7) 0.0249(7) 0.0235(7) 0.0026(6) 0.0122(6) -0.0017(6)
N2 0.0289(7) 0.0222(7) 0.0238(7) 0.0021(5) 0.0111(6) -0.0002(6)
N3 0.0261(8) 0.0326(8) 0.0334(8) -0.0084(6) 0.0105(6) -0.0002(6)
N4 0.0307(11) 0.0252(10) 0.0264(10) 0.000 0.0120(9) 0.000
C1 0.0305(9) 0.0242(8) 0.0243(8) 0.0013(6) 0.0135(7) -0.0023(7)
C2 0.0280(9) 0.0294(9) 0.0342(9) 0.0032(7) 0.0153(8) -0.0069(7)
C3 0.0261(9) 0.0300(9) 0.0337(9) 0.0001(7) 0.0116(7) -0.0045(7)
C4 0.0348(10) 0.0259(9) 0.0245(8) 0.0032(7) 0.0124(7) 0.0017(7)
C5 0.0397(10) 0.0299(9) 0.0242(8) -0.0006(7) 0.0128(8) 0.0022(8)
C6 0.0702(15) 0.0426(12) 0.0308(10) 0.0075(9) 0.0286(10) 0.0116(11)
C7 0.100(2) 0.0426(13) 0.0422(12) 0.0187(10) 0.0430(13) 0.0191(13)
C8 0.0861(18) 0.0325(11) 0.0479(12) 0.0156(9) 0.0388(13) 0.0231(11)
C9 0.0504(12) 0.0317(10) 0.0323(9) 0.0056(8) 0.0216(9) 0.0099(9)
C10 0.0541(12) 0.0311(10) 0.0340(10) -0.0008(8) 0.0227(9) 0.0065(9)
C11 0.084(2) 0.0480(16) 0.121(3) -0.0380(17) 0.031(2) -0.0117(15)
C12 0.083(2) 0.0483(15) 0.101(2) 0.0011(14) 0.0633(18) 0.0150(13)
C13 0.0607(14) 0.0355(11) 0.0428(11) 0.0053(9) 0.0310(10) 0.0135(10)
C14 0.0750(18) 0.0692(17) 0.0554(14) -0.0165(13) 0.0382(14) 0.0032(14)
C15 0.0630(16) 0.0722(18) 0.0666(16) 0.0002(14) 0.0352(14) 0.0146(14)
C16 0.0257(8) 0.0288(9) 0.0244(8) 0.0056(7) 0.0107(7) -0.0030(7)
C17 0.0307(9) 0.0321(9) 0.0279(9) 0.0012(7) 0.0142(7) -0.0070(7)
C18 0.0375(10) 0.0433(11) 0.0268(9) 0.0010(8) 0.0122(8) -0.0079(9)
C19 0.0346(11) 0.0500(12) 0.0302(10) 0.0084(9) 0.0056(8) 0.0005(9)
C20 0.0339(10) 0.0441(12) 0.0383(10) 0.0071(9) 0.0131(9) 0.0089(9)
C21 0.0314(9) 0.0325(10) 0.0299(9) 0.0048(7) 0.0146(8) 0.0006(8)
C22 0.0375(11) 0.0451(12) 0.0307(9) -0.0067(8) 0.0125(8) 0.0003(9)
C23 0.090(2) 0.0368(12) 0.0557(14) -0.0039(10) 0.0394(14) 0.0048(12)
C24 0.0499(13) 0.0769(17) 0.0445(12) -0.0099(12) 0.0276(11) 0.0014(12)
C25 0.0340(10) 0.0402(11) 0.0337(10) 0.0020(8) 0.0162(8) 0.0076(8)
C26 0.0604(15) 0.0432(13) 0.0490(13) -0.0008(10) 0.0238(11) 0.0107(11)
C27 0.0714(17) 0.0699(17) 0.0496(13) -0.0011(12) 0.0400(13) -0.0049(13)
C28 0.0298(11) 0.0601(15) 0.0547(13) -0.0034(11) 0.0129(10) 0.0095(10)
C31 0.125(3) 0.118(3) 0.090(2) 0.007(2) 0.077(2) 0.047(2)
C32 0.0664(18) 0.0347(13) 0.137(3) -0.0049(16) 0.0418(19) -0.0024(12)
C33 0.0358(13) 0.0473(14) 0.126(3) -0.0263(16) 0.0261(15) 0.0026(11)
C34 0.0633(16) 0.0404(13) 0.0912(19) 0.0119(12) 0.0486(15) 0.0158(11)
C35 0.0783(17) 0.0468(13) 0.0626(14) 0.0106(11) 0.0535(14) 0.0162(12)
C36 0.0749(18) 0.0722(18) 0.0516(14) -0.0257(13) 0.0254(13) -0.0018(15)
 
_geom_special_details
;
 All esds (except the esd in the dihedral angle between two l.s. planes)
 are estimated using the full covariance matrix.  The cell esds are taken
 into account individually in the estimation of esds in distances, angles
 and torsion angles; correlations between esds in cell parameters are only
 used when they are defined by crystal symmetry.  An approximate (isotropic)
 treatment of cell esds is used for estimating esds involving l.s. planes.
;
 
loop_
 _geom_bond_atom_site_label_1
 _geom_bond_atom_site_label_2
 _geom_bond_distance
 _geom_bond_site_symmetry_2
 _geom_bond_publ_flag
Mg N3 2.0238(15) . ?
Mg N3 2.0238(15) 2_556 ?
Mg N4 2.033(2) . ?
Mg Si1A 3.147(4) . ?
Mg Si1A 3.147(4) 2_556 ?
Mg Si1 3.2102(12) . ?
Mg Si1 3.2102(12) 2_556 ?
Mg Si2 3.2278(8) . ?
Mg Si2 3.2278(8) 2_556 ?
Mg Si3 3.2329(9) 2_556 ?
Mg Si3 3.2329(9) . ?
K C1 2.8614(17) 7_566 ?
K C1 2.8614(16) . ?
K C4 3.1537(18) 7_566 ?
K C4 3.1537(18) . ?
K C5 3.2846(18) 7_566 ?
K C5 3.2846(18) . ?
K N2 3.4574(14) 7_566 ?
K N2 3.4574(14) . ?
K C9 3.487(2) 7_566 ?
K C9 3.487(2) . ?
Si1 N3 1.7119(17) . ?
Si1 C29 1.875(4) . ?
Si1 C30 1.886(3) . ?
Si1 C28 1.888(3) . ?
Si1A N3 1.697(4) . ?
Si1A C29A 1.860(18) . ?
Si1A C30A 1.881(18) . ?
Si1A C28 1.901(8) . ?
Si2 N3 1.6947(16) . ?
Si2 C31 1.860(3) . ?
Si2 C32 1.872(3) . ?
Si2 C33 1.872(3) . ?
Si3 N4 1.6998(11) . ?
Si3 C35 1.869(2) . ?
Si3 C34 1.880(2) . ?
Si3 C36 1.886(3) . ?
N1 C1 1.362(2) . ?
N1 C2 1.390(2) . ?
N1 C16 1.444(2) . ?
N2 C1 1.367(2) . ?
N2 C3 1.385(2) . ?
N2 C4 1.444(2) . ?
N4 Si3 1.6998(11) 2_556 ?
C2 C3 1.344(2) . ?
C4 C9 1.399(3) . ?
C4 C5 1.403(2) . ?
C5 C6 1.393(3) . ?
C5 C10 1.520(3) . ?
C6 C7 1.382(3) . ?
C7 C8 1.380(3) . ?
C8 C9 1.393(3) . ?
C9 C13 1.519(3) . ?
C10 C11 1.514(3) . ?
C10 C12 1.516(3) . ?
C13 C14 1.525(3) . ?
C13 C15 1.535(3) . ?
C16 C21 1.398(3) . ?
C16 C17 1.402(2) . ?
C17 C18 1.394(3) . ?
C17 C22 1.519(3) . ?
C18 C19 1.381(3) . ?
C19 C20 1.375(3) . ?
C20 C21 1.399(3) . ?
C21 C25 1.525(3) . ?
C22 C23 1.527(3) . ?
C22 C24 1.527(3) . ?
C25 C26 1.521(3) . ?
C25 C27 1.526(3) . ?
 
loop_
 _geom_angle_atom_site_label_1
 _geom_angle_atom_site_label_2
 _geom_angle_atom_site_label_3
 _geom_angle
 _geom_angle_site_symmetry_1
 _geom_angle_site_symmetry_3
 _geom_angle_publ_flag
N3 Mg N3 119.04(10) . 2_556 ?
N3 Mg N4 120.48(5) . . ?
N3 Mg N4 120.48(5) 2_556 . ?
N3 Mg Si1A 29.20(9) . . ?
N3 Mg Si1A 121.7(3) 2_556 . ?
N4 Mg Si1A 110.0(2) . . ?
N3 Mg Si1A 121.7(3) . 2_556 ?
N3 Mg Si1A 29.20(9) 2_556 2_556 ?
N4 Mg Si1A 110.0(2) . 2_556 ?
Si1A Mg Si1A 140.0(5) . 2_556 ?
N3 Mg Si1 28.02(5) . . ?
N3 Mg Si1 134.53(7) 2_556 . ?
N4 Mg Si1 100.31(3) . . ?
Si1A Mg Si1 13.2(2) . . ?
Si1A Mg Si1 148.3(3) 2_556 . ?
N3 Mg Si1 134.53(7) . 2_556 ?
N3 Mg Si1 28.02(5) 2_556 2_556 ?
N4 Mg Si1 100.31(3) . 2_556 ?
Si1A Mg Si1 148.3(3) . 2_556 ?
Si1A Mg Si1 13.2(2) 2_556 2_556 ?
Si1 Mg Si1 159.38(7) . 2_556 ?
N3 Mg Si2 26.98(4) . . ?
N3 Mg Si2 100.85(5) 2_556 . ?
N4 Mg Si2 133.865(15) . . ?
Si1A Mg Si2 54.84(9) . . ?
Si1A Mg Si2 95.9(3) 2_556 . ?
Si1 Mg Si2 54.98(2) . . ?
Si1 Mg Si2 109.02(5) 2_556 . ?
N3 Mg Si2 100.85(5) . 2_556 ?
N3 Mg Si2 26.98(4) 2_556 2_556 ?
N4 Mg Si2 133.865(15) . 2_556 ?
Si1A Mg Si2 95.9(3) . 2_556 ?
Si1A Mg Si2 54.84(9) 2_556 2_556 ?
Si1 Mg Si2 109.02(5) . 2_556 ?
Si1 Mg Si2 54.98(2) 2_556 2_556 ?
Si2 Mg Si2 92.27(3) . 2_556 ?
N3 Mg Si3 99.22(5) . 2_556 ?
N3 Mg Si3 137.93(5) 2_556 2_556 ?
N4 Mg Si3 27.163(12) . 2_556 ?
Si1A Mg Si3 100.1(3) . 2_556 ?
Si1A Mg Si3 115.64(16) 2_556 2_556 ?
Si1 Mg Si3 87.53(4) . 2_556 ?
Si1 Mg Si3 111.20(2) 2_556 2_556 ?
Si2 Mg Si3 107.176(15) . 2_556 ?
Si2 Mg Si3 159.68(2) 2_556 2_556 ?
N3 Mg Si3 137.93(5) . . ?
N3 Mg Si3 99.22(5) 2_556 . ?
N4 Mg Si3 27.163(12) . . ?
Si1A Mg Si3 115.64(16) . . ?
Si1A Mg Si3 100.1(3) 2_556 . ?
Si1 Mg Si3 111.20(2) . . ?
Si1 Mg Si3 87.53(4) 2_556 . ?
Si2 Mg Si3 159.68(2) . . ?
Si2 Mg Si3 107.176(15) 2_556 . ?
Si3 Mg Si3 54.33(2) 2_556 . ?
C1 K C1 180.00(6) 7_566 . ?
C1 K C4 47.25(5) 7_566 7_566 ?
C1 K C4 132.75(5) . 7_566 ?
C1 K C4 132.75(4) 7_566 . ?
C1 K C4 47.25(5) . . ?
C4 K C4 180.00(4) 7_566 . ?
C1 K C5 62.18(5) 7_566 7_566 ?
C1 K C5 117.82(5) . 7_566 ?
C4 K C5 25.07(5) 7_566 7_566 ?
C4 K C5 154.93(5) . 7_566 ?
C1 K C5 117.82(5) 7_566 . ?
C1 K C5 62.17(5) . . ?
C4 K C5 154.93(5) 7_566 . ?
C4 K C5 25.07(5) . . ?
C5 K C5 180.0 7_566 . ?
C1 K N2 22.56(4) 7_566 7_566 ?
C1 K N2 157.44(4) . 7_566 ?
C4 K N2 24.69(4) 7_566 7_566 ?
C4 K N2 155.31(4) . 7_566 ?
C5 K N2 42.42(4) 7_566 7_566 ?
C5 K N2 137.58(4) . 7_566 ?
C1 K N2 157.44(4) 7_566 . ?
C1 K N2 22.56(4) . . ?
C4 K N2 155.31(4) 7_566 . ?
C4 K N2 24.69(4) . . ?
C5 K N2 137.58(4) 7_566 . ?
C5 K N2 42.42(4) . . ?
N2 K N2 180.00(3) 7_566 . ?
C1 K C9 61.35(5) 7_566 7_566 ?
C1 K C9 118.65(5) . 7_566 ?
C4 K C9 23.64(5) 7_566 7_566 ?
C4 K C9 156.36(5) . 7_566 ?
C5 K C9 42.43(5) 7_566 7_566 ?
C5 K C9 137.57(5) . 7_566 ?
N2 K C9 41.25(4) 7_566 7_566 ?
N2 K C9 138.75(4) . 7_566 ?
C1 K C9 118.65(5) 7_566 . ?
C1 K C9 61.35(5) . . ?
C4 K C9 156.36(5) 7_566 . ?
C4 K C9 23.64(5) . . ?
C5 K C9 137.57(5) 7_566 . ?
C5 K C9 42.43(5) . . ?
N2 K C9 138.75(4) 7_566 . ?
N2 K C9 41.25(4) . . ?
C9 K C9 180.00(3) 7_566 . ?
N3 Si1 C29 114.84(16) . . ?
N3 Si1 C30 112.43(15) . . ?
C29 Si1 C30 105.1(2) . . ?
N3 Si1 C28 110.06(12) . . ?
C29 Si1 C28 108.75(15) . . ?
C30 Si1 C28 105.06(18) . . ?
N3 Si1 Mg 33.74(6) . . ?
C29 Si1 Mg 119.90(12) . . ?
C30 Si1 Mg 131.67(16) . . ?
C28 Si1 Mg 77.49(8) . . ?
N3 Si1A C29A 107.7(8) . . ?
N3 Si1A C30A 120.4(8) . . ?
C29A Si1A C30A 104.9(13) . . ?
N3 Si1A C28 110.1(4) . . ?
C29A Si1A C28 96.6(9) . . ?
C30A Si1A C28 114.0(6) . . ?
N3 Si1A Mg 35.58(10) . . ?
C29A Si1A Mg 129.7(10) . . ?
C30A Si1A Mg 122.8(8) . . ?
C28 Si1A Mg 79.05(18) . . ?
N3 Si2 C31 115.14(12) . . ?
N3 Si2 C32 113.48(12) . . ?
C31 Si2 C32 104.87(18) . . ?
N3 Si2 C33 110.71(10) . . ?
C31 Si2 C33 105.10(17) . . ?
C32 Si2 C33 106.85(14) . . ?
N3 Si2 Mg 32.81(5) . . ?
C31 Si2 Mg 134.30(12) . . ?
C32 Si2 Mg 117.63(12) . . ?
C33 Si2 Mg 78.92(9) . . ?
N4 Si3 C35 111.41(9) . . ?
N4 Si3 C34 114.32(10) . . ?
C35 Si3 C34 104.76(11) . . ?
N4 Si3 C36 113.91(9) . . ?
C35 Si3 C36 108.31(13) . . ?
C34 Si3 C36 103.40(13) . . ?
N4 Si3 Mg 33.10(6) . . ?
C35 Si3 Mg 80.30(7) . . ?
C34 Si3 Mg 136.39(9) . . ?
C36 Si3 Mg 116.20(9) . . ?
C1 N1 C2 112.44(14) . . ?
C1 N1 C16 122.58(14) . . ?
C2 N1 C16 124.92(14) . . ?
C1 N2 C3 112.68(14) . . ?
C1 N2 C4 119.21(14) . . ?
C3 N2 C4 128.10(14) . . ?
C1 N2 K 53.41(8) . . ?
C3 N2 K 166.08(11) . . ?
C4 N2 K 65.80(9) . . ?
Si2 N3 Si1A 119.9(3) . . ?
Si2 N3 Si1 121.45(10) . . ?
Si1A N3 Si1 24.9(4) . . ?
Si2 N3 Mg 120.21(8) . . ?
Si1A N3 Mg 115.22(15) . . ?
Si1 N3 Mg 118.24(9) . . ?
Si3 N4 Si3 120.52(12) 2_556 . ?
Si3 N4 Mg 119.74(6) 2_556 . ?
Si3 N4 Mg 119.74(6) . . ?
N1 C1 N2 102.23(14) . . ?
N1 C1 K 153.73(12) . . ?
N2 C1 K 104.04(10) . . ?
C3 C2 N1 106.46(15) . . ?
C2 C3 N2 106.19(15) . . ?
C9 C4 C5 122.58(16) . . ?
C9 C4 N2 118.72(15) . . ?
C5 C4 N2 118.31(15) . . ?
C9 C4 K 91.67(12) . . ?
C5 C4 K 82.69(11) . . ?
N2 C4 K 89.51(9) . . ?
C6 C5 C4 117.32(17) . . ?
C6 C5 C10 120.44(17) . . ?
C4 C5 C10 122.23(16) . . ?
C6 C5 K 93.20(13) . . ?
C4 C5 K 72.24(10) . . ?
C10 C5 K 105.17(11) . . ?
C7 C6 C5 121.25(19) . . ?
C8 C7 C6 120.02(19) . . ?
C7 C8 C9 121.37(19) . . ?
C8 C9 C4 117.35(18) . . ?
C8 C9 C13 119.60(18) . . ?
C4 C9 C13 123.06(17) . . ?
C8 C9 K 92.45(15) . . ?
C4 C9 K 64.69(11) . . ?
C13 C9 K 111.95(13) . . ?
C11 C10 C12 109.9(2) . . ?
C11 C10 C5 109.37(19) . . ?
C12 C10 C5 113.22(18) . . ?
C9 C13 C14 111.07(19) . . ?
C9 C13 C15 110.54(18) . . ?
C14 C13 C15 110.7(2) . . ?
C21 C16 C17 122.81(16) . . ?
C21 C16 N1 118.21(15) . . ?
C17 C16 N1 118.97(16) . . ?
C18 C17 C16 117.15(17) . . ?
C18 C17 C22 121.41(17) . . ?
C16 C17 C22 121.39(16) . . ?
C19 C18 C17 121.17(18) . . ?
C20 C19 C18 120.56(18) . . ?
C19 C20 C21 120.91(19) . . ?
C16 C21 C20 117.38(17) . . ?
C16 C21 C25 121.97(16) . . ?
C20 C21 C25 120.63(17) . . ?
C17 C22 C23 109.75(18) . . ?
C17 C22 C24 113.22(18) . . ?
C23 C22 C24 110.24(19) . . ?
C26 C25 C21 112.41(16) . . ?
C26 C25 C27 111.15(19) . . ?
C21 C25 C27 110.40(17) . . ?
Si1 C28 Si1A 22.4(3) . . ?
 
_diffrn_measured_fraction_theta_max    0.996
_diffrn_reflns_theta_full              27.46
_diffrn_measured_fraction_theta_full   0.996
_refine_diff_density_max    0.635
_refine_diff_density_min   -0.416
_refine_diff_density_rms    0.088

#=====>END

#======================================================
 
data_compound4
 
_audit_creation_method            SHELXL-97
_chemical_name_systematic
;
 ?
;
_chemical_name_common             ?
_chemical_melting_point           ?
_chemical_formula_moiety          
'4(C54 H72 Li N4), 4(C18 H54 Ca N3 Si6), C14 H16, 2(C3.25 H5.25)'
_chemical_formula_sum
 'C308.50 H530.50 Ca4 Li4 N28 Si24'
_chemical_formula_weight          5494.35
 
loop_
 _atom_type_symbol
 _atom_type_description
 _atom_type_scat_dispersion_real
 _atom_type_scat_dispersion_imag
 _atom_type_scat_source
 'C'  'C'   0.0033   0.0016
 'International Tables Vol C Tables 4.2.6.8 and 6.1.1.4'
 'H'  'H'   0.0000   0.0000
 'International Tables Vol C Tables 4.2.6.8 and 6.1.1.4'
 'N'  'N'   0.0061   0.0033
 'International Tables Vol C Tables 4.2.6.8 and 6.1.1.4'
 'Si'  'Si'   0.0817   0.0704
 'International Tables Vol C Tables 4.2.6.8 and 6.1.1.4'
 'Ca'  'Ca'   0.2262   0.3064
 'International Tables Vol C Tables 4.2.6.8 and 6.1.1.4'
 'Li'  'Li'  -0.0003   0.0001
 'International Tables Vol C Tables 4.2.6.8 and 6.1.1.4'
 
_symmetry_cell_setting            triclinic
_symmetry_space_group_name_H-M    'P -1'
 
loop_
 _symmetry_equiv_pos_as_xyz
 'x, y, z'
 '-x, -y, -z'
 
_cell_length_a                    17.7709(2)
_cell_length_b                    22.5526(3)
_cell_length_c                    23.9297(3)
_cell_angle_alpha                 71.0000(10)
_cell_angle_beta                  81.6270(10)
_cell_angle_gamma                 85.2310(10)
_cell_volume                      8964.84(19)
_cell_formula_units_Z             1
_cell_measurement_temperature     150(2)
_cell_measurement_reflns_used     284910
_cell_measurement_theta_min        2.910
_cell_measurement_theta_max        27.485
 
_exptl_crystal_description        block
_exptl_crystal_colour             colourless
_exptl_crystal_size_max           0.50
_exptl_crystal_size_mid           0.40
_exptl_crystal_size_min           0.40
_exptl_crystal_density_meas       ?
_exptl_crystal_density_diffrn     1.018
_exptl_crystal_density_method     'not measured'
_exptl_crystal_F_000              3006
_exptl_absorpt_coefficient_mu     0.190
_exptl_absorpt_correction_type    none
_exptl_absorpt_correction_T_min   ?
_exptl_absorpt_correction_T_max   ?
_exptl_absorpt_process_details    ?
 
_exptl_special_details
;
 ?
;
 
_diffrn_ambient_temperature       150(2)
_diffrn_radiation_wavelength      0.71073
_diffrn_radiation_type            MoK\a
_diffrn_radiation_source          'fine-focus sealed tube'
_diffrn_radiation_monochromator   graphite
_diffrn_measurement_device_type   'Nonius Kappa CCD'
_diffrn_measurement_method        '611 1.0 degree images with \f and \w scans'
_diffrn_standards_number          0
_diffrn_standards_decay_%         0
_diffrn_reflns_number             134577
_diffrn_reflns_av_R_equivalents   0.0612
_diffrn_reflns_av_sigmaI/netI     0.0574
_diffrn_reflns_limit_h_min        -22
_diffrn_reflns_limit_h_max        22
_diffrn_reflns_limit_k_min        -29
_diffrn_reflns_limit_k_max        28
_diffrn_reflns_limit_l_min        -30
_diffrn_reflns_limit_l_max        30
_diffrn_reflns_theta_min          4.81
_diffrn_reflns_theta_max          27.35
_reflns_number_total              39285
_reflns_number_gt                 24206
_reflns_threshold_expression      >2sigma(I)
 
_computing_data_collection        'Collect (Nonius BV, 1997-2000)'
_computing_cell_refinement         'HKL Scalepack (Otwinski & Minor, 1997)'
_computing_data_reduction         
;
 DENZO-SCALEPACK Z. Otwinowski and W. Minor, " 
 Processing of X-ray Diffraction Data Collected in Oscillation Mode ", 
 Methods in Enzymology, Volume 276: Macromolecular Crystallography, 
 part A, p.307-326, 1997,C.W. Carter, Jr. & R. M. Sweet, Eds., Academic Press.
;
_computing_structure_solution     
; 
 SIR97- Altomare A., Burla M.C., Camalli M., Cascarano G.L., Giacovazzo C. , 
 Guagliardi A., Moliterni A.G.G., Polidori G.,Spagna R. 
 (1999) J. Appl. Cryst. 32, 115-119
;
_computing_structure_refinement   
;
 SHELXL97 -Program for Crystal Structure Analysis (Release 97-2). 
 Sheldrick, G.M., Instit\"ut f\"ur Anorganische Chemie der Universit\"at, 
 Tammanstrasse 4, D-3400 G\"ottingen, Germany, 1998 
;
_computing_molecular_graphics  

'ORTEP3 for Windows - Farrugia, L. J. J. Appl. Crystallogr. 1997, 30, 565'

_computing_publication_material    
;
 'WinGX publication routines, Farrugia, 
 L. J., J. Appl. Crystallogr., 1999, 32, 837-838
; 
 
_refine_special_details
;
 Refinement of F^2^ against ALL reflections.  The weighted R-factor wR and
 goodness of fit S are based on F^2^, conventional R-factors R are based
 on F, with F set to zero for negative F^2^. The threshold expression of
 F^2^ > 2sigma(F^2^) is used only for calculating R-factors(gt) etc. and is
 not relevant to the choice of reflections for refinement.  R-factors based
 on F^2^ are statistically about twice as large as those based on F, and R-
 factors based on ALL data will be even larger.
;
 
_refine_ls_structure_factor_coef  Fsqd
_refine_ls_matrix_type            full
_refine_ls_weighting_scheme       calc
_refine_ls_weighting_details
 'calc w=1/[\s^2^(Fo^2^)+(0.0944P)^2^+9.1602P] where P=(Fo^2^+2Fc^2^)/3'
_atom_sites_solution_primary      direct
_atom_sites_solution_secondary    difmap
_atom_sites_solution_hydrogens    geom
_refine_ls_hydrogen_treatment     constr
_refine_ls_extinction_method      none
_refine_ls_extinction_coef        ?
_refine_ls_number_reflns          39285
_refine_ls_number_parameters      1843
_refine_ls_number_restraints      5
_refine_ls_R_factor_all           0.1245
_refine_ls_R_factor_gt            0.0708
_refine_ls_wR_factor_ref          0.2216
_refine_ls_wR_factor_gt           0.1789
_refine_ls_goodness_of_fit_ref    1.027
_refine_ls_restrained_S_all       1.027
_refine_ls_shift/su_max           0.001
_refine_ls_shift/su_mean          0.000
 
loop_
 _atom_site_label
 _atom_site_type_symbol
 _atom_site_fract_x
 _atom_site_fract_y
 _atom_site_fract_z
 _atom_site_U_iso_or_equiv
 _atom_site_adp_type
 _atom_site_occupancy
 _atom_site_symmetry_multiplicity
 _atom_site_calc_flag
 _atom_site_refinement_flags
 _atom_site_disorder_assembly
 _atom_site_disorder_group
Ca1 Ca 0.18114(4) 0.84527(4) 0.40365(3) 0.05175(18) Uani 1 1 d . A .
Ca2 Ca 0.24990(4) 0.36182(3) 0.86322(3) 0.04349(16) Uani 1 1 d . . .
Li1 Li 0.7444(3) 0.1344(3) 0.1109(2) 0.0514(13) Uani 1 1 d . . .
Li2 Li 0.7004(3) 0.5974(3) 0.6410(3) 0.0609(16) Uani 1 1 d . . .
Si1 Si 0.28146(6) 0.75319(5) 0.32850(5) 0.0587(3) Uani 1 1 d . A .
Si2 Si 0.36996(6) 0.85092(7) 0.34829(6) 0.0772(4) Uani 1 1 d . A .
Si3 Si 0.20457(10) 0.79087(7) 0.55047(6) 0.0953(5) Uani 1 1 d . . .
Si4 Si 0.15333(8) 0.92773(6) 0.50307(6) 0.0737(3) Uani 1 1 d . . .
Si5 Si -0.00853(6) 0.82691(5) 0.40005(5) 0.0603(3) Uani 1 1 d . . .
Si6 Si 0.07708(7) 0.91526(7) 0.29183(5) 0.0793(4) Uani 1 1 d . . .
Si7 Si 0.14021(5) 0.35449(5) 0.76050(4) 0.0467(2) Uani 1 1 d . . .
Si8 Si 0.20454(5) 0.48056(4) 0.74078(4) 0.0443(2) Uani 1 1 d . . .
Si9 Si 0.38467(4) 0.26140(4) 0.82070(4) 0.03814(18) Uani 1 1 d . . .
Si10 Si 0.30226(5) 0.21293(4) 0.94427(4) 0.0455(2) Uani 1 1 d . . .
Si11 Si 0.31953(5) 0.43039(4) 0.95164(4) 0.04027(19) Uani 1 1 d . . .
Si12 Si 0.14764(5) 0.43077(4) 0.95885(4) 0.0421(2) Uani 1 1 d . . .
N1 N 0.73305(14) 0.15130(12) -0.02561(11) 0.0415(6) Uani 1 1 d . . .
N2 N 0.62291(13) 0.15264(12) 0.02295(11) 0.0397(5) Uani 1 1 d . . .
N3 N 0.77317(14) 0.07133(11) 0.24591(11) 0.0411(6) Uani 1 1 d . . .
N4 N 0.85104(13) 0.14355(11) 0.20236(11) 0.0375(5) Uani 1 1 d . . .
N5 N 0.57618(14) 0.69379(13) 0.56364(12) 0.0435(6) Uani 1 1 d . . .
N6 N 0.59355(15) 0.71456(13) 0.64073(12) 0.0457(6) Uani 1 1 d . . .
N7 N 0.83717(13) 0.49927(11) 0.63403(10) 0.0348(5) Uani 1 1 d . . .
N8 N 0.78664(13) 0.47543(11) 0.72397(10) 0.0359(5) Uani 1 1 d . . .
N9 N 0.29072(16) 0.81248(15) 0.35552(14) 0.0572(7) Uani 1 1 d . . .
N10 N 0.1816(2) 0.85667(16) 0.49677(14) 0.0659(9) Uani 1 1 d . A .
N11 N 0.06978(16) 0.86347(14) 0.36032(13) 0.0550(7) Uani 1 1 d . A .
N12 N 0.19087(14) 0.40395(12) 0.77865(11) 0.0417(6) Uani 1 1 d . . .
N13 N 0.31985(13) 0.26810(11) 0.87718(11) 0.0385(5) Uani 1 1 d . . .
N14 N 0.23765(14) 0.41344(11) 0.93368(10) 0.0386(5) Uani 1 1 d . . .
C1 C 0.69810(16) 0.14678(14) 0.03036(13) 0.0386(6) Uani 1 1 d . . .
C2 C 0.68080(19) 0.15964(18) -0.06558(15) 0.0525(8) Uani 1 1 d . . .
H2 H 0.6919 0.1641 -0.1068 0.063 Uiso 1 1 calc R . .
C3 C 0.61203(19) 0.16018(17) -0.03487(15) 0.0525(8) Uani 1 1 d . . .
H3 H 0.5645 0.1649 -0.0499 0.063 Uiso 1 1 calc R . .
C4 C 0.81452(17) 0.15344(16) -0.04396(13) 0.0447(7) Uani 1 1 d . . .
C5 C 0.85438(18) 0.09814(17) -0.04660(14) 0.0488(8) Uani 1 1 d . . .
C6 C 0.9318(2) 0.1028(2) -0.06797(16) 0.0611(10) Uani 1 1 d . . .
H6 H 0.9607 0.0664 -0.0712 0.073 Uiso 1 1 calc R . .
C7 C 0.9672(2) 0.1593(2) -0.08455(18) 0.0689(11) Uani 1 1 d . . .
H7 H 1.0201 0.1614 -0.0985 0.083 Uiso 1 1 calc R . .
C8 C 0.9255(2) 0.21279(19) -0.08087(17) 0.0629(10) Uani 1 1 d . . .
H8 H 0.9504 0.2514 -0.0922 0.076 Uiso 1 1 calc R . .
C9 C 0.84765(19) 0.21149(17) -0.06097(14) 0.0513(8) Uani 1 1 d . . .
C10 C 0.8160(2) 0.03545(17) -0.02855(16) 0.0538(8) Uani 1 1 d . . .
H10 H 0.7699 0.0370 0.0004 0.065 Uiso 1 1 calc R . .
C11 C 0.7895(3) 0.0256(2) -0.0832(2) 0.0728(11) Uani 1 1 d . . .
H11A H 0.7515 0.0585 -0.0992 0.109 Uiso 1 1 calc R . .
H11B H 0.7670 -0.0156 -0.0715 0.109 Uiso 1 1 calc R . .
H11C H 0.8332 0.0276 -0.1139 0.109 Uiso 1 1 calc R . .
C12 C 0.8671(2) -0.01992(18) 0.00169(18) 0.0631(10) Uani 1 1 d . . .
H12A H 0.9095 -0.0258 -0.0274 0.095 Uiso 1 1 calc R . .
H12B H 0.8376 -0.0580 0.0175 0.095 Uiso 1 1 calc R . .
H12C H 0.8871 -0.0116 0.0344 0.095 Uiso 1 1 calc R . .
C13 C 0.8024(2) 0.27115(17) -0.06017(16) 0.0581(9) Uani 1 1 d . . .
H13 H 0.7476 0.2607 -0.0487 0.070 Uiso 1 1 calc R . .
C14 C 0.8102(3) 0.3201(2) -0.1220(2) 0.0849(14) Uani 1 1 d . . .
H14A H 0.7759 0.3563 -0.1216 0.127 Uiso 1 1 calc R . .
H14B H 0.7970 0.3018 -0.1510 0.127 Uiso 1 1 calc R . .
H14C H 0.8628 0.3337 -0.1330 0.127 Uiso 1 1 calc R . .
C15 C 0.8254(4) 0.2974(2) -0.0145(2) 0.0977(17) Uani 1 1 d . . .
H15A H 0.8186 0.2657 0.0250 0.147 Uiso 1 1 calc R . .
H15B H 0.7934 0.3348 -0.0140 0.147 Uiso 1 1 calc R . .
H15C H 0.8789 0.3087 -0.0251 0.147 Uiso 1 1 calc R . .
C16 C 0.56104(16) 0.15441(15) 0.06907(14) 0.0423(7) Uani 1 1 d . . .
C17 C 0.54211(18) 0.21176(16) 0.07959(15) 0.0472(7) Uani 1 1 d . . .
C18 C 0.4804(2) 0.2125(2) 0.12254(17) 0.0595(9) Uani 1 1 d . . .
H18 H 0.4659 0.2505 0.1310 0.071 Uiso 1 1 calc R . .
C19 C 0.4402(2) 0.1599(2) 0.15280(17) 0.0672(11) Uani 1 1 d . . .
H19 H 0.3987 0.1617 0.1822 0.081 Uiso 1 1 calc R . .
C20 C 0.4594(2) 0.1044(2) 0.14107(17) 0.0622(10) Uani 1 1 d . . .
H20 H 0.4309 0.0683 0.1624 0.075 Uiso 1 1 calc R . .
C21 C 0.51999(18) 0.10036(17) 0.09825(16) 0.0515(8) Uani 1 1 d . . .
C22 C 0.5857(2) 0.27082(16) 0.04580(16) 0.0524(8) Uani 1 1 d . . .
H22 H 0.6405 0.2586 0.0375 0.063 Uiso 1 1 calc R . .
C23 C 0.5558(3) 0.3043(2) -0.0127(2) 0.0950(16) Uani 1 1 d . . .
H23A H 0.5566 0.2750 -0.0354 0.142 Uiso 1 1 calc R . .
H23B H 0.5880 0.3396 -0.0355 0.142 Uiso 1 1 calc R . .
H23C H 0.5035 0.3200 -0.0052 0.142 Uiso 1 1 calc R . .
C24 C 0.5799(3) 0.3162(3) 0.0808(3) 0.0972(16) Uani 1 1 d . . .
H24A H 0.6188 0.3476 0.0630 0.146 Uiso 1 1 calc R . .
H24B H 0.5879 0.2933 0.1222 0.146 Uiso 1 1 calc R . .
H24C H 0.5293 0.3371 0.0801 0.146 Uiso 1 1 calc R . .
C25 C 0.5409(2) 0.03839(18) 0.08663(19) 0.0651(10) Uani 1 1 d . . .
H25 H 0.5769 0.0470 0.0489 0.078 Uiso 1 1 calc R . .
C26 C 0.4725(4) 0.0076(3) 0.0788(4) 0.123(2) Uani 1 1 d . . .
H26A H 0.4893 -0.0301 0.0678 0.184 Uiso 1 1 calc R . .
H26B H 0.4458 0.0370 0.0473 0.184 Uiso 1 1 calc R . .
H26C H 0.4380 -0.0042 0.1162 0.184 Uiso 1 1 calc R . .
C27 C 0.5821(4) -0.0054(3) 0.1369(3) 0.131(3) Uani 1 1 d . . .
H27A H 0.5555 -0.0038 0.1753 0.196 Uiso 1 1 calc R . .
H27B H 0.6344 0.0078 0.1322 0.196 Uiso 1 1 calc R . .
H27C H 0.5828 -0.0484 0.1355 0.196 Uiso 1 1 calc R . .
C28 C 0.79083(16) 0.11587(13) 0.19231(13) 0.0389(6) Uani 1 1 d . . .
C29 C 0.82071(19) 0.07079(15) 0.28716(14) 0.0467(7) Uani 1 1 d . . .
H29 H 0.8191 0.0434 0.3270 0.056 Uiso 1 1 calc R . .
C30 C 0.86939(18) 0.11668(15) 0.25951(14) 0.0449(7) Uani 1 1 d . . .
H30 H 0.9090 0.1284 0.2761 0.054 Uiso 1 1 calc R . .
C31 C 0.71077(18) 0.02938(15) 0.26079(13) 0.0443(7) Uani 1 1 d . . .
C32 C 0.6411(2) 0.04908(18) 0.28417(17) 0.0568(9) Uani 1 1 d . . .
C33 C 0.5824(2) 0.0066(2) 0.30160(19) 0.0671(10) Uani 1 1 d . . .
H33 H 0.5337 0.0185 0.3178 0.081 Uiso 1 1 calc R . .
C34 C 0.5944(2) -0.0515(2) 0.2956(2) 0.0735(12) Uani 1 1 d . . .
H34 H 0.5538 -0.0797 0.3078 0.088 Uiso 1 1 calc R . .
C35 C 0.6643(2) -0.07032(19) 0.27222(17) 0.0608(10) Uani 1 1 d . . .
H35 H 0.6712 -0.1111 0.2685 0.073 Uiso 1 1 calc R . .
C36 C 0.72487(19) -0.02991(15) 0.25396(14) 0.0468(7) Uani 1 1 d . . .
C37 C 0.6269(2) 0.1135(2) 0.2913(2) 0.0716(11) Uani 1 1 d . . .
H37 H 0.6764 0.1351 0.2789 0.086 Uiso 1 1 calc R . .
C38 C 0.5716(5) 0.1524(3) 0.2522(3) 0.135(3) Uani 1 1 d . . .
H38A H 0.5904 0.1565 0.2106 0.203 Uiso 1 1 calc R . .
H38B H 0.5654 0.1941 0.2571 0.203 Uiso 1 1 calc R . .
H38C H 0.5224 0.1323 0.2631 0.203 Uiso 1 1 calc R . .
C39 C 0.6014(4) 0.1093(3) 0.3561(3) 0.1021(17) Uani 1 1 d . . .
H39A H 0.6080 0.1498 0.3615 0.153 Uiso 1 1 calc R . .
H39B H 0.6322 0.0767 0.3821 0.153 Uiso 1 1 calc R . .
H39C H 0.5476 0.0988 0.3666 0.153 Uiso 1 1 calc R . .
C40 C 0.8004(2) -0.04972(16) 0.22657(16) 0.0533(8) Uani 1 1 d . . .
H40 H 0.8399 -0.0221 0.2294 0.064 Uiso 1 1 calc R . .
C41 C 0.7987(3) -0.0412(2) 0.16140(18) 0.0810(13) Uani 1 1 d . . .
H41A H 0.7583 -0.0659 0.1574 0.122 Uiso 1 1 calc R . .
H41B H 0.8479 -0.0554 0.1446 0.122 Uiso 1 1 calc R . .
H41C H 0.7891 0.0033 0.1399 0.122 Uiso 1 1 calc R . .
C42 C 0.8241(3) -0.1180(2) 0.2585(2) 0.0883(14) Uani 1 1 d . . .
H42A H 0.8193 -0.1251 0.3015 0.132 Uiso 1 1 calc R . .
H42B H 0.8770 -0.1262 0.2438 0.132 Uiso 1 1 calc R . .
H42C H 0.7911 -0.1462 0.2505 0.132 Uiso 1 1 calc R . .
C43 C 0.89259(16) 0.19379(13) 0.15781(14) 0.0396(6) Uani 1 1 d . . .
C44 C 0.87178(19) 0.25566(15) 0.15471(16) 0.0515(8) Uani 1 1 d . . .
C45 C 0.9144(2) 0.30248(17) 0.11232(19) 0.0629(10) Uani 1 1 d . . .
H45 H 0.9025 0.3452 0.1094 0.075 Uiso 1 1 calc R . .
C46 C 0.9736(2) 0.28786(18) 0.07468(18) 0.0627(10) Uani 1 1 d . . .
H46 H 1.0010 0.3206 0.0451 0.075 Uiso 1 1 calc R . .
C47 C 0.99335(19) 0.22691(17) 0.07928(16) 0.0546(8) Uani 1 1 d . . .
H47 H 1.0348 0.2178 0.0531 0.066 Uiso 1 1 calc R . .
C48 C 0.95380(17) 0.17762(15) 0.12176(14) 0.0418(7) Uani 1 1 d . . .
C49 C 0.8047(3) 0.27184(18) 0.1946(2) 0.0781(13) Uani 1 1 d . . .
H49 H 0.7907 0.2326 0.2279 0.094 Uiso 1 1 calc R . .
C50 C 0.8257(4) 0.3210(3) 0.2223(3) 0.122(2) Uani 1 1 d . . .
H50A H 0.8298 0.3623 0.1916 0.183 Uiso 1 1 calc R . .
H50B H 0.8746 0.3084 0.2381 0.183 Uiso 1 1 calc R . .
H50C H 0.7861 0.3234 0.2546 0.183 Uiso 1 1 calc R . .
C51 C 0.7390(4) 0.2938(6) 0.1618(4) 0.193(5) Uani 1 1 d . . .
H51A H 0.7519 0.3314 0.1279 0.289 Uiso 1 1 calc R . .
H51B H 0.6960 0.3039 0.1883 0.289 Uiso 1 1 calc R . .
H51C H 0.7250 0.2608 0.1474 0.289 Uiso 1 1 calc R . .
C52 C 0.97664(19) 0.11015(16) 0.12788(16) 0.0501(8) Uani 1 1 d . . .
H52 H 0.9536 0.0840 0.1682 0.060 Uiso 1 1 calc R . .
C53 C 1.0624(2) 0.0973(2) 0.1246(2) 0.0723(11) Uani 1 1 d . . .
H53A H 1.0865 0.1189 0.0843 0.108 Uiso 1 1 calc R . .
H53B H 1.0735 0.0521 0.1343 0.108 Uiso 1 1 calc R . .
H53C H 1.0824 0.1128 0.1531 0.108 Uiso 1 1 calc R . .
C54 C 0.9443(2) 0.0890(2) 0.0820(2) 0.0748(12) Uani 1 1 d . . .
H54A H 0.8888 0.0954 0.0863 0.112 Uiso 1 1 calc R . .
H54B H 0.9574 0.0444 0.0886 0.112 Uiso 1 1 calc R . .
H54C H 0.9659 0.1135 0.0418 0.112 Uiso 1 1 calc R . .
C55 C 0.61491(17) 0.67198(15) 0.61181(13) 0.0410(7) Uani 1 1 d . . .
C56 C 0.5453(2) 0.76069(18) 0.61142(17) 0.0559(9) Uani 1 1 d . . .
H56 H 0.5239 0.7953 0.6235 0.067 Uiso 1 1 calc R . .
C57 C 0.5337(2) 0.74802(18) 0.56245(17) 0.0550(8) Uani 1 1 d . . .
H57 H 0.5027 0.7716 0.5330 0.066 Uiso 1 1 calc R . .
C58 C 0.57758(18) 0.66588(16) 0.51683(14) 0.0479(7) Uani 1 1 d . . .
C59 C 0.6284(2) 0.68898(17) 0.46509(15) 0.0554(8) Uani 1 1 d . . .
C60 C 0.6236(3) 0.6649(2) 0.41899(17) 0.0705(11) Uani 1 1 d . . .
H60 H 0.6571 0.6792 0.3830 0.085 Uiso 1 1 calc R . .
C61 C 0.5714(3) 0.6208(2) 0.42438(18) 0.0728(12) Uani 1 1 d . . .
H61 H 0.5695 0.6051 0.3923 0.087 Uiso 1 1 calc R . .
C62 C 0.5225(2) 0.5996(2) 0.47572(18) 0.0664(10) Uani 1 1 d . . .
H62 H 0.4864 0.5696 0.4785 0.080 Uiso 1 1 calc R . .
C63 C 0.52410(19) 0.62074(18) 0.52389(16) 0.0533(8) Uani 1 1 d . . .
C64 C 0.6852(2) 0.73754(18) 0.46042(17) 0.0628(10) Uani 1 1 d . . .
H64 H 0.6639 0.7617 0.4880 0.075 Uiso 1 1 calc R . .
C65 C 0.6983(4) 0.7844(3) 0.3968(2) 0.1088(19) Uani 1 1 d . . .
H65A H 0.7195 0.7619 0.3690 0.163 Uiso 1 1 calc R . .
H65B H 0.7339 0.8158 0.3957 0.163 Uiso 1 1 calc R . .
H65C H 0.6497 0.8054 0.3853 0.163 Uiso 1 1 calc R . .
C66 C 0.7597(3) 0.7059(2) 0.4801(3) 0.0885(14) Uani 1 1 d . . .
H66A H 0.7497 0.6735 0.5189 0.133 Uiso 1 1 calc R . .
H66B H 0.7925 0.7372 0.4833 0.133 Uiso 1 1 calc R . .
H66C H 0.7851 0.6866 0.4508 0.133 Uiso 1 1 calc R . .
C67 C 0.4688(2) 0.5977(2) 0.5812(2) 0.0684(11) Uani 1 1 d . . .
H67 H 0.4911 0.6064 0.6137 0.082 Uiso 1 1 calc R . .
C68 C 0.3933(3) 0.6335(3) 0.5747(3) 0.114(2) Uani 1 1 d . . .
H68A H 0.4017 0.6787 0.5607 0.171 Uiso 1 1 calc R . .
H68B H 0.3613 0.6223 0.6133 0.171 Uiso 1 1 calc R . .
H68C H 0.3679 0.6228 0.5457 0.171 Uiso 1 1 calc R . .
C69 C 0.4561(2) 0.5272(2) 0.6008(2) 0.0768(12) Uani 1 1 d . . .
H69A H 0.4284 0.5181 0.5722 0.115 Uiso 1 1 calc R . .
H69B H 0.4263 0.5142 0.6403 0.115 Uiso 1 1 calc R . .
H69C H 0.5053 0.5041 0.6023 0.115 Uiso 1 1 calc R . .
C70 C 0.6192(2) 0.71218(16) 0.69575(15) 0.0501(8) Uani 1 1 d . . .
C71 C 0.5843(2) 0.67038(17) 0.74875(16) 0.0560(9) Uani 1 1 d . . .
C72 C 0.6119(3) 0.6678(2) 0.80064(17) 0.0668(11) Uani 1 1 d . . .
H72 H 0.5911 0.6394 0.8376 0.080 Uiso 1 1 calc R . .
C73 C 0.6691(3) 0.7056(2) 0.79945(18) 0.0739(12) Uani 1 1 d . . .
H73 H 0.6873 0.7027 0.8357 0.089 Uiso 1 1 calc R . .
C74 C 0.7007(2) 0.7477(2) 0.74726(19) 0.0669(10) Uani 1 1 d . . .
H74 H 0.7393 0.7740 0.7481 0.080 Uiso 1 1 calc R . .
C75 C 0.6767(2) 0.75204(18) 0.69326(16) 0.0557(9) Uani 1 1 d . . .
C76 C 0.5187(3) 0.63100(19) 0.74941(19) 0.0696(11) Uani 1 1 d . . .
H76 H 0.5323 0.6129 0.7161 0.083 Uiso 1 1 calc R . .
C77 C 0.5020(4) 0.5766(2) 0.8063(2) 0.1047(18) Uani 1 1 d . . .
H77A H 0.4871 0.5928 0.8398 0.157 Uiso 1 1 calc R . .
H77B H 0.5477 0.5491 0.8134 0.157 Uiso 1 1 calc R . .
H77C H 0.4605 0.5528 0.8024 0.157 Uiso 1 1 calc R . .
C78 C 0.4449(3) 0.6704(2) 0.7381(3) 0.0926(15) Uani 1 1 d . . .
H78A H 0.4045 0.6435 0.7377 0.139 Uiso 1 1 calc R . .
H78B H 0.4527 0.7036 0.6996 0.139 Uiso 1 1 calc R . .
H78C H 0.4301 0.6893 0.7698 0.139 Uiso 1 1 calc R . .
C79 C 0.7117(2) 0.7980(2) 0.63569(18) 0.0667(10) Uani 1 1 d . . .
H79 H 0.6870 0.7932 0.6025 0.080 Uiso 1 1 calc R . .
C80 C 0.6955(4) 0.8660(2) 0.6365(3) 0.1054(18) Uani 1 1 d . . .
H80A H 0.6404 0.8751 0.6401 0.158 Uiso 1 1 calc R . .
H80B H 0.7198 0.8952 0.5995 0.158 Uiso 1 1 calc R . .
H80C H 0.7159 0.8711 0.6706 0.158 Uiso 1 1 calc R . .
C81 C 0.7962(3) 0.7844(3) 0.6237(3) 0.1047(17) Uani 1 1 d . . .
H81A H 0.8212 0.7856 0.6572 0.157 Uiso 1 1 calc R . .
H81B H 0.8175 0.8160 0.5871 0.157 Uiso 1 1 calc R . .
H81C H 0.8046 0.7427 0.6190 0.157 Uiso 1 1 calc R . .
C82 C 0.78231(17) 0.52050(13) 0.67003(12) 0.0367(6) Uani 1 1 d . . .
C83 C 0.87291(17) 0.44347(14) 0.66429(13) 0.0404(7) Uani 1 1 d . . .
H83 H 0.9121 0.4202 0.6481 0.048 Uiso 1 1 calc R . .
C84 C 0.84090(17) 0.42895(15) 0.72121(13) 0.0410(7) Uani 1 1 d . . .
H84 H 0.8533 0.3934 0.7534 0.049 Uiso 1 1 calc R . .
C85 C 0.85928(16) 0.53142(13) 0.57150(12) 0.0371(6) Uani 1 1 d . . .
C86 C 0.81993(18) 0.51935(14) 0.53061(13) 0.0415(7) Uani 1 1 d . . .
C87 C 0.8432(2) 0.55117(17) 0.47019(14) 0.0530(8) Uani 1 1 d . . .
H87 H 0.8175 0.5451 0.4405 0.064 Uiso 1 1 calc R . .
C88 C 0.9030(2) 0.59112(17) 0.45350(14) 0.0564(9) Uani 1 1 d . . .
H88 H 0.9175 0.6124 0.4124 0.068 Uiso 1 1 calc R . .
C89 C 0.9420(2) 0.60076(16) 0.49513(14) 0.0511(8) Uani 1 1 d . . .
H89 H 0.9836 0.6280 0.4826 0.061 Uiso 1 1 calc R . .
C90 C 0.92089(17) 0.57074(15) 0.55604(13) 0.0422(7) Uani 1 1 d . . .
C91 C 0.75561(18) 0.47388(16) 0.54927(14) 0.0470(7) Uani 1 1 d . . .
H91 H 0.7580 0.4483 0.5919 0.056 Uiso 1 1 calc R . .
C92 C 0.7638(3) 0.4289(2) 0.5130(2) 0.0847(14) Uani 1 1 d . . .
H92A H 0.7255 0.3968 0.5299 0.127 Uiso 1 1 calc R . .
H92B H 0.8148 0.4087 0.5140 0.127 Uiso 1 1 calc R . .
H92C H 0.7562 0.4522 0.4717 0.127 Uiso 1 1 calc R . .
C93 C 0.6787(2) 0.5084(2) 0.5455(3) 0.0934(16) Uani 1 1 d . . .
H93A H 0.6736 0.5322 0.5039 0.140 Uiso 1 1 calc R . .
H93B H 0.6744 0.5373 0.5689 0.140 Uiso 1 1 calc R . .
H93C H 0.6383 0.4781 0.5614 0.140 Uiso 1 1 calc R . .
C94 C 0.9621(2) 0.58178(18) 0.60285(16) 0.0557(9) Uani 1 1 d . . .
H94 H 0.9557 0.5440 0.6392 0.067 Uiso 1 1 calc R . .
C95 C 1.0484(2) 0.5893(2) 0.5827(2) 0.0745(12) Uani 1 1 d . . .
H95A H 1.0695 0.5538 0.5696 0.112 Uiso 1 1 calc R . .
H95B H 1.0736 0.5904 0.6161 0.112 Uiso 1 1 calc R . .
H95C H 1.0568 0.6285 0.5497 0.112 Uiso 1 1 calc R . .
C96 C 0.9273(3) 0.6380(2) 0.62028(19) 0.0741(12) Uani 1 1 d . . .
H96A H 0.9282 0.6752 0.5847 0.111 Uiso 1 1 calc R . .
H96B H 0.9568 0.6455 0.6488 0.111 Uiso 1 1 calc R . .
H96C H 0.8746 0.6298 0.6386 0.111 Uiso 1 1 calc R . .
C97 C 0.74402(17) 0.47747(14) 0.77986(12) 0.0389(6) Uani 1 1 d . . .
C98 C 0.67522(17) 0.44790(15) 0.79939(13) 0.0420(7) Uani 1 1 d . . .
C99 C 0.63799(19) 0.44851(18) 0.85425(15) 0.0543(8) Uani 1 1 d . . .
H99 H 0.5909 0.4285 0.8690 0.065 Uiso 1 1 calc R . .
C100 C 0.6687(2) 0.4780(2) 0.88800(16) 0.0631(10) Uani 1 1 d . . .
H100 H 0.6420 0.4787 0.9252 0.076 Uiso 1 1 calc R . .
C101 C 0.7371(2) 0.50596(19) 0.86787(15) 0.0578(9) Uani 1 1 d . . .
H101 H 0.7578 0.5253 0.8918 0.069 Uiso 1 1 calc R . .
C102 C 0.77702(19) 0.50679(17) 0.81320(14) 0.0488(8) Uani 1 1 d . . .
C103 C 0.64169(19) 0.41516(16) 0.76289(15) 0.0491(8) Uani 1 1 d . . .
H103 H 0.6843 0.4039 0.7355 0.059 Uiso 1 1 calc R . .
C104 C 0.6036(2) 0.35540(18) 0.80097(18) 0.0616(9) Uani 1 1 d . . .
H10A H 0.6389 0.3285 0.8272 0.092 Uiso 1 1 calc R . .
H10B H 0.5889 0.3333 0.7753 0.092 Uiso 1 1 calc R . .
H10C H 0.5581 0.3656 0.8251 0.092 Uiso 1 1 calc R . .
C105 C 0.5850(3) 0.4585(2) 0.72469(19) 0.0729(11) Uani 1 1 d . . .
H10D H 0.5667 0.4370 0.6999 0.109 Uiso 1 1 calc R . .
H10E H 0.6100 0.4968 0.6991 0.109 Uiso 1 1 calc R . .
H10F H 0.5418 0.4693 0.7506 0.109 Uiso 1 1 calc R . .
C106 C 0.8542(2) 0.5361(2) 0.79363(16) 0.0609(10) Uani 1 1 d . . .
H106 H 0.8741 0.5313 0.7540 0.073 Uiso 1 1 calc R . .
C107 C 0.8479(3) 0.6056(2) 0.7861(2) 0.0865(14) Uani 1 1 d . . .
H10G H 0.8134 0.6266 0.7565 0.130 Uiso 1 1 calc R . .
H10H H 0.8984 0.6234 0.7725 0.130 Uiso 1 1 calc R . .
H10I H 0.8280 0.6117 0.8243 0.130 Uiso 1 1 calc R . .
C108 C 0.9101(2) 0.5010(3) 0.8375(2) 0.0838(14) Uani 1 1 d . . .
H10J H 0.8901 0.5023 0.8775 0.126 Uiso 1 1 calc R . .
H10K H 0.9594 0.5210 0.8250 0.126 Uiso 1 1 calc R . .
H10L H 0.9166 0.4573 0.8380 0.126 Uiso 1 1 calc R . .
C109 C 0.1866(2) 0.7171(2) 0.3590(2) 0.0723(11) Uani 1 1 d . . .
H10M H 0.1836 0.6987 0.4024 0.108 Uiso 1 1 calc R A .
H10N H 0.1807 0.6842 0.3416 0.108 Uiso 1 1 calc R . .
H10O H 0.1460 0.7494 0.3489 0.108 Uiso 1 1 calc R . .
C110 C 0.2829(3) 0.7787(3) 0.2451(2) 0.0808(13) Uani 1 1 d . . .
H11D H 0.2445 0.8126 0.2330 0.121 Uiso 1 1 calc R A .
H11E H 0.2717 0.7431 0.2332 0.121 Uiso 1 1 calc R . .
H11F H 0.3334 0.7938 0.2258 0.121 Uiso 1 1 calc R . .
C111 C 0.3558(3) 0.6881(2) 0.3472(2) 0.0766(12) Uani 1 1 d . . .
H11G H 0.4058 0.7039 0.3274 0.115 Uiso 1 1 calc R A .
H11H H 0.3438 0.6539 0.3336 0.115 Uiso 1 1 calc R . .
H11I H 0.3567 0.6725 0.3904 0.115 Uiso 1 1 calc R . .
C112 C 0.4151(4) 0.8824(5) 0.2677(3) 0.158(4) Uani 1 1 d . . .
H11J H 0.4488 0.8497 0.2576 0.237 Uiso 1 1 calc R A .
H11K H 0.4447 0.9190 0.2626 0.237 Uiso 1 1 calc R . .
H11L H 0.3751 0.8946 0.2415 0.237 Uiso 1 1 calc R . .
C113 C 0.4436(3) 0.8054(3) 0.3957(4) 0.132(3) Uani 1 1 d . . .
H11M H 0.4185 0.7796 0.4342 0.198 Uiso 1 1 calc R A .
H11N H 0.4768 0.8345 0.4021 0.198 Uiso 1 1 calc R . .
H11O H 0.4741 0.7782 0.3756 0.198 Uiso 1 1 calc R . .
C114 C 0.3475(3) 0.9232(2) 0.3705(3) 0.0887(14) Uani 1 1 d . . .
H11P H 0.3136 0.9517 0.3439 0.133 Uiso 1 1 calc R A .
H11Q H 0.3947 0.9442 0.3676 0.133 Uiso 1 1 calc R . .
H11R H 0.3223 0.9117 0.4116 0.133 Uiso 1 1 calc R . .
C115 C 0.2195(3) 0.7242(2) 0.5206(2) 0.0794(12) Uani 1 1 d . A .
H11S H 0.1726 0.7179 0.5066 0.119 Uiso 1 1 calc R . .
H11T H 0.2333 0.6862 0.5520 0.119 Uiso 1 1 calc R . .
H11U H 0.2606 0.7334 0.4872 0.119 Uiso 1 1 calc R . .
C116 C 0.167(3) 0.7807(19) 0.6180(9) 0.27(3) Uani 0.42(2) 1 d P A 1
H11V H 0.1632 0.8207 0.6262 0.411 Uiso 0.42(2) 1 calc PR A 1
H11W H 0.1978 0.7502 0.6454 0.411 Uiso 0.42(2) 1 calc PR A 1
H11X H 0.1153 0.7648 0.6236 0.411 Uiso 0.42(2) 1 calc PR A 1
C117 C 0.3260(16) 0.8116(9) 0.5505(14) 0.128(11) Uani 0.42(2) 1 d P A 1
H11Y H 0.3523 0.8226 0.5097 0.192 Uiso 0.42(2) 1 calc PR A 1
H11Z H 0.3514 0.7744 0.5758 0.192 Uiso 0.42(2) 1 calc PR A 1
H011 H 0.3273 0.8467 0.5659 0.192 Uiso 0.42(2) 1 calc PR A 1
C216 C 0.1167(7) 0.7602(7) 0.6153(6) 0.085(3) Uani 0.58(2) 1 d P A 2
H21A H 0.1087 0.7875 0.6403 0.128 Uiso 0.58(2) 1 calc PR A 2
H21B H 0.1284 0.7171 0.6397 0.128 Uiso 0.58(2) 1 calc PR A 2
H21C H 0.0704 0.7611 0.5971 0.128 Uiso 0.58(2) 1 calc PR A 2
C217 C 0.2819(7) 0.7889(6) 0.5907(6) 0.082(3) Uani 0.58(2) 1 d P A 2
H21D H 0.3300 0.7883 0.5650 0.124 Uiso 0.58(2) 1 calc PR A 2
H21E H 0.2799 0.7511 0.6257 0.124 Uiso 0.58(2) 1 calc PR A 2
H21F H 0.2783 0.8262 0.6036 0.124 Uiso 0.58(2) 1 calc PR A 2
C118 C 0.2237(4) 0.9644(3) 0.5321(3) 0.116(2) Uani 1 1 d . A .
H01B H 0.2348 0.9362 0.5711 0.175 Uiso 1 1 calc R . .
H01C H 0.2023 1.0045 0.5361 0.175 Uiso 1 1 calc R . .
H01D H 0.2708 0.9716 0.5042 0.175 Uiso 1 1 calc R . .
C119 C 0.0623(4) 0.9285(3) 0.5531(3) 0.119(2) Uani 1 1 d . A .
H01E H 0.0212 0.9144 0.5378 0.179 Uiso 1 1 calc R . .
H01F H 0.0500 0.9712 0.5545 0.179 Uiso 1 1 calc R . .
H01G H 0.0681 0.9003 0.5933 0.179 Uiso 1 1 calc R . .
C120 C 0.1390(3) 0.9846(2) 0.4280(2) 0.0904(14) Uani 1 1 d . A .
H12D H 0.1869 0.9883 0.4013 0.136 Uiso 1 1 calc R . .
H12E H 0.1225 1.0258 0.4320 0.136 Uiso 1 1 calc R . .
H12F H 0.0999 0.9695 0.4115 0.136 Uiso 1 1 calc R . .
C121 C 0.0140(3) 0.7767(3) 0.4756(2) 0.0972(16) Uani 1 1 d . A .
H12G H 0.0515 0.7435 0.4715 0.146 Uiso 1 1 calc R . .
H12H H -0.0325 0.7577 0.4998 0.146 Uiso 1 1 calc R . .
H12I H 0.0349 0.8026 0.4951 0.146 Uiso 1 1 calc R . .
C123 C -0.0907(3) 0.8804(3) 0.4133(3) 0.1042(18) Uani 1 1 d . A .
H12J H -0.0748 0.9082 0.4331 0.156 Uiso 1 1 calc R . .
H12K H -0.1327 0.8553 0.4386 0.156 Uiso 1 1 calc R . .
H12L H -0.1074 0.9056 0.3751 0.156 Uiso 1 1 calc R . .
C124 C -0.0453(2) 0.7713(2) 0.3683(2) 0.0742(12) Uani 1 1 d . A .
H12M H -0.0576 0.7941 0.3280 0.111 Uiso 1 1 calc R . .
H12N H -0.0912 0.7524 0.3936 0.111 Uiso 1 1 calc R . .
H12O H -0.0064 0.7383 0.3666 0.111 Uiso 1 1 calc R . .
C125 C 0.052(2) 0.893(2) 0.2288(13) 0.114(12) Uani 0.42(2) 1 d P A 1
H12P H 0.0893 0.8615 0.2208 0.171 Uiso 0.42(2) 1 calc PR A 1
H12Q H 0.0529 0.9305 0.1933 0.171 Uiso 0.42(2) 1 calc PR A 1
H12R H 0.0012 0.8763 0.2391 0.171 Uiso 0.42(2) 1 calc PR A 1
C126 C 0.0124(13) 0.9922(12) 0.2886(8) 0.082(6) Uani 0.42(2) 1 d P A 1
H12S H -0.0406 0.9840 0.2875 0.123 Uiso 0.42(2) 1 calc PR A 1
H12T H 0.0301 1.0264 0.2527 0.123 Uiso 0.42(2) 1 calc PR A 1
H12U H 0.0157 1.0043 0.3240 0.123 Uiso 0.42(2) 1 calc PR A 1
C225 C 0.0696(18) 0.871(2) 0.2348(11) 0.168(16) Uani 0.58(2) 1 d P A 2
H22A H 0.1173 0.8471 0.2297 0.251 Uiso 0.58(2) 1 calc PR A 2
H22B H 0.0601 0.9013 0.1964 0.251 Uiso 0.58(2) 1 calc PR A 2
H22C H 0.0276 0.8420 0.2499 0.251 Uiso 0.58(2) 1 calc PR A 2
C226 C 0.0099(14) 0.9787(13) 0.2787(14) 0.234(18) Uani 0.58(2) 1 d P A 2
H22D H -0.0410 0.9632 0.2958 0.351 Uiso 0.58(2) 1 calc PR A 2
H22E H 0.0108 0.9993 0.2356 0.351 Uiso 0.58(2) 1 calc PR A 2
H22F H 0.0225 1.0089 0.2972 0.351 Uiso 0.58(2) 1 calc PR A 2
C127 C 0.1761(3) 0.9464(2) 0.2690(2) 0.0781(12) Uani 1 1 d . A .
H12V H 0.1851 0.9712 0.2941 0.117 Uiso 1 1 calc R . .
H12W H 0.1811 0.9730 0.2272 0.117 Uiso 1 1 calc R . .
H12X H 0.2135 0.9112 0.2739 0.117 Uiso 1 1 calc R . .
C128 C 0.1248(2) 0.2801(2) 0.82513(17) 0.0636(10) Uani 1 1 d . . .
H12Y H 0.1742 0.2599 0.8353 0.095 Uiso 1 1 calc R . .
H12Z H 0.0954 0.2516 0.8141 0.095 Uiso 1 1 calc R . .
H012 H 0.0968 0.2901 0.8596 0.095 Uiso 1 1 calc R . .
C129 C 0.0429(2) 0.3863(3) 0.7402(3) 0.0882(15) Uani 1 1 d . . .
H21G H 0.0128 0.3962 0.7740 0.132 Uiso 1 1 calc R . .
H21H H 0.0173 0.3548 0.7304 0.132 Uiso 1 1 calc R . .
H21I H 0.0481 0.4245 0.7056 0.132 Uiso 1 1 calc R . .
C130 C 0.1887(2) 0.32881(19) 0.69653(16) 0.0609(9) Uani 1 1 d . . .
H13A H 0.1955 0.3654 0.6605 0.091 Uiso 1 1 calc R . .
H13B H 0.1573 0.2986 0.6898 0.091 Uiso 1 1 calc R . .
H13C H 0.2385 0.3090 0.7059 0.091 Uiso 1 1 calc R . .
C131 C 0.1196(2) 0.53401(19) 0.74926(18) 0.0653(10) Uani 1 1 d . . .
H13D H 0.0757 0.5205 0.7367 0.098 Uiso 1 1 calc R . .
H13E H 0.1309 0.5771 0.7244 0.098 Uiso 1 1 calc R . .
H13F H 0.1080 0.5323 0.7911 0.098 Uiso 1 1 calc R . .
C132 C 0.2308(2) 0.4977(2) 0.65866(15) 0.0612(9) Uani 1 1 d . . .
H13G H 0.2754 0.4713 0.6512 0.092 Uiso 1 1 calc R . .
H13H H 0.2428 0.5420 0.6402 0.092 Uiso 1 1 calc R . .
H13I H 0.1881 0.4886 0.6415 0.092 Uiso 1 1 calc R . .
C133 C 0.2844(2) 0.50886(18) 0.76809(16) 0.0554(8) Uani 1 1 d . . .
H13J H 0.2723 0.5023 0.8109 0.083 Uiso 1 1 calc R . .
H13K H 0.2908 0.5537 0.7469 0.083 Uiso 1 1 calc R . .
H13L H 0.3316 0.4854 0.7607 0.083 Uiso 1 1 calc R . .
C134 C 0.40020(18) 0.34057(16) 0.76346(14) 0.0475(7) Uani 1 1 d . . .
H13M H 0.3517 0.3586 0.7494 0.071 Uiso 1 1 calc R . .
H13N H 0.4363 0.3362 0.7298 0.071 Uiso 1 1 calc R . .
H13O H 0.4207 0.3682 0.7813 0.071 Uiso 1 1 calc R . .
C136 C 0.3568(2) 0.20969(18) 0.78016(17) 0.0575(9) Uani 1 1 d . . .
H13P H 0.3585 0.1658 0.8058 0.086 Uiso 1 1 calc R . .
H13Q H 0.3924 0.2145 0.7437 0.086 Uiso 1 1 calc R . .
H13R H 0.3051 0.2217 0.7698 0.086 Uiso 1 1 calc R . .
C137 C 0.47969(18) 0.22745(17) 0.84454(17) 0.0526(8) Uani 1 1 d . . .
H13S H 0.4989 0.2528 0.8654 0.079 Uiso 1 1 calc R . .
H13T H 0.5157 0.2276 0.8094 0.079 Uiso 1 1 calc R . .
H13U H 0.4739 0.1843 0.8713 0.079 Uiso 1 1 calc R . .
C138 C 0.3722(2) 0.2100(2) 0.99660(18) 0.0695(11) Uani 1 1 d . . .
H13V H 0.4234 0.2006 0.9793 0.104 Uiso 1 1 calc R . .
H13W H 0.3586 0.1772 1.0346 0.104 Uiso 1 1 calc R . .
H13X H 0.3712 0.2506 1.0034 0.104 Uiso 1 1 calc R . .
C139 C 0.3034(4) 0.1309(2) 0.9409(2) 0.0946(16) Uani 1 1 d . . .
H13Y H 0.2648 0.1282 0.9166 0.142 Uiso 1 1 calc R . .
H13Z H 0.2922 0.1016 0.9813 0.142 Uiso 1 1 calc R . .
H013 H 0.3537 0.1202 0.9231 0.142 Uiso 1 1 calc R . .
C140 C 0.2068(2) 0.2294(2) 0.98244(18) 0.0794(13) Uani 1 1 d . . .
H14D H 0.2057 0.2711 0.9870 0.119 Uiso 1 1 calc R . .
H14E H 0.1977 0.1977 1.0218 0.119 Uiso 1 1 calc R . .
H14F H 0.1671 0.2279 0.9585 0.119 Uiso 1 1 calc R . .
C141 C 0.3278(2) 0.51546(18) 0.94442(19) 0.0633(10) Uani 1 1 d . . .
H14G H 0.3211 0.5417 0.9037 0.095 Uiso 1 1 calc R . .
H14H H 0.3782 0.5217 0.9532 0.095 Uiso 1 1 calc R . .
H14I H 0.2884 0.5271 0.9726 0.095 Uiso 1 1 calc R . .
C142 C 0.40202(17) 0.41088(17) 0.90076(14) 0.0469(7) Uani 1 1 d . . .
H14J H 0.4022 0.3662 0.9047 0.070 Uiso 1 1 calc R . .
H14K H 0.4498 0.4201 0.9116 0.070 Uiso 1 1 calc R . .
H14L H 0.3970 0.4361 0.8594 0.070 Uiso 1 1 calc R . .
C143 C 0.3391(2) 0.3847(2) 1.02968(15) 0.0624(10) Uani 1 1 d . . .
H14M H 0.2977 0.3932 1.0583 0.094 Uiso 1 1 calc R . .
H14N H 0.3873 0.3973 1.0368 0.094 Uiso 1 1 calc R . .
H14O H 0.3424 0.3397 1.0346 0.094 Uiso 1 1 calc R . .
C144 C 0.1261(2) 0.4021(2) 1.04186(15) 0.0602(10) Uani 1 1 d . . .
H14P H 0.1365 0.3567 1.0566 0.090 Uiso 1 1 calc R . .
H14Q H 0.0724 0.4114 1.0534 0.090 Uiso 1 1 calc R . .
H14R H 0.1582 0.4231 1.0591 0.090 Uiso 1 1 calc R . .
C145 C 0.07922(19) 0.39411(19) 0.92844(15) 0.0545(8) Uani 1 1 d . . .
H14S H 0.0893 0.4079 0.8849 0.082 Uiso 1 1 calc R . .
H14T H 0.0270 0.4069 0.9406 0.082 Uiso 1 1 calc R . .
H14U H 0.0855 0.3483 0.9440 0.082 Uiso 1 1 calc R . .
C146 C 0.1208(3) 0.51704(19) 0.9354(3) 0.0823(14) Uani 1 1 d . . .
H14V H 0.1488 0.5379 0.9557 0.123 Uiso 1 1 calc R . .
H14W H 0.0660 0.5229 0.9462 0.123 Uiso 1 1 calc R . .
H14X H 0.1337 0.5353 0.8922 0.123 Uiso 1 1 calc R . .
C147 C 0.9610(14) 0.7773(16) 0.7287(15) 0.214(18) Uani 0.50 1 d P B 1
H14Y H 0.9795 0.7368 0.7542 0.322 Uiso 0.50 1 calc PR B 1
H14Z H 1.0023 0.8068 0.7156 0.322 Uiso 0.50 1 calc PR B 1
H014 H 0.9433 0.7717 0.6939 0.322 Uiso 0.50 1 calc PR B 1
C148 C 0.8927(3) 0.8041(4) 0.7652(3) 0.067(2) Uani 0.50 1 d PG B 1
C149 C 0.8707(5) 0.7615(3) 0.8209(4) 0.091(6) Uani 0.50 1 d PG B 1
H149 H 0.8980 0.7225 0.8340 0.109 Uiso 0.50 1 calc PR B 1
C150 C 0.8086(5) 0.7759(4) 0.8575(3) 0.078(3) Uani 0.50 1 d PG B 1
H150 H 0.7936 0.7467 0.8956 0.094 Uiso 0.50 1 calc PR B 1
C151 C 0.7686(4) 0.8330(5) 0.8383(3) 0.078(3) Uani 0.50 1 d PG B 1
H151 H 0.7262 0.8428 0.8633 0.094 Uiso 0.50 1 calc PR B 1
C152 C 0.7906(5) 0.8756(4) 0.7826(4) 0.096(7) Uani 0.50 1 d PG B 1
H152 H 0.7632 0.9146 0.7695 0.115 Uiso 0.50 1 calc PR B 1
C153 C 0.8527(5) 0.8612(4) 0.7461(3) 0.079(5) Uani 0.50 1 d PG B 1
H153 H 0.8677 0.8904 0.7080 0.094 Uiso 0.50 1 calc PR B 1
C247 C 0.7705(14) 0.8768(10) 0.8132(13) 0.152(9) Uani 0.50 1 d P C 2
H24D H 0.7495 0.8524 0.8536 0.228 Uiso 0.50 1 calc PR C 2
H24E H 0.7309 0.8855 0.7868 0.228 Uiso 0.50 1 calc PR C 2
H24F H 0.7888 0.9164 0.8137 0.228 Uiso 0.50 1 calc PR C 2
C248 C 0.8286(6) 0.8439(5) 0.7935(5) 0.110(5) Uani 0.50 1 d PG C 2
C249 C 0.8558(7) 0.7842(5) 0.8238(4) 0.086(4) Uani 0.50 1 d PG C 2
H249 H 0.8330 0.7626 0.8629 0.103 Uiso 0.50 1 calc PR C 2
C250 C 0.9165(7) 0.7560(4) 0.7968(6) 0.146(9) Uani 0.50 1 d PG C 2
H250 H 0.9352 0.7152 0.8175 0.175 Uiso 0.50 1 calc PR C 2
C251 C 0.9499(6) 0.7876(6) 0.7396(6) 0.107(7) Uani 0.50 1 d PG C 2
H251 H 0.9914 0.7684 0.7212 0.128 Uiso 0.50 1 calc PR C 2
C252 C 0.9227(7) 0.8473(6) 0.7094(4) 0.109(4) Uani 0.50 1 d PG C 2
H252 H 0.9455 0.8689 0.6703 0.130 Uiso 0.50 1 calc PR C 2
C253 C 0.8620(7) 0.8755(4) 0.7363(5) 0.109(7) Uani 0.50 1 d PG C 2
H253 H 0.8433 0.9163 0.7156 0.131 Uiso 0.50 1 calc PR C 2
C154 C 0.6189(10) 0.9075(9) 0.4620(10) 0.114(6) Uani 0.50 1 d PD D 1
H15D H 0.6209 0.8738 0.4442 0.171 Uiso 0.50 1 calc PR D 1
H15E H 0.6369 0.8909 0.5012 0.171 Uiso 0.50 1 calc PR D 1
H15F H 0.6515 0.9413 0.4361 0.171 Uiso 0.50 1 calc PR D 1
C155 C 0.5382(10) 0.9329(7) 0.4688(7) 0.113(5) Uani 0.50 1 d PD D 1
H15G H 0.5200 0.9509 0.4294 0.136 Uiso 0.50 1 calc PR D 1
H15H H 0.5044 0.8988 0.4937 0.136 Uiso 0.50 1 calc PR D 1
C156 C 0.5373(11) 0.9818(7) 0.4975(7) 0.088(4) Uani 0.50 1 d PD . 1
H15I H 0.5769 1.0120 0.4747 0.106 Uiso 0.50 1 calc PR . 1
H15J H 0.5518 0.9618 0.5380 0.106 Uiso 0.50 1 calc PR . 1
C254 C 0.576(2) 0.9475(16) 0.5012(13) 0.191(12) Uani 0.50 1 d PD . 2
C255 C 0.507(2) 0.9637(19) 0.4773(16) 0.29(3) Uani 0.50 1 d PD . 2
H255 H 0.5066 0.9406 0.4504 0.348 Uiso 0.50 1 calc PR . 2
C256 C 0.4388(18) 0.9982(13) 0.4753(11) 0.220(16) Uani 0.50 1 d PD . 2
H256 H 0.3994 0.9869 0.4582 0.263 Uiso 0.50 1 calc PR . 2
C257 C 0.637(3) 0.912(3) 0.479(2) 0.22(4) Uani 0.25 1 d PD E 2
H25A H 0.6166 0.8819 0.4640 0.335 Uiso 0.25 1 calc PR E 2
H25B H 0.6682 0.8898 0.5104 0.335 Uiso 0.25 1 calc PR E 2
H25C H 0.6695 0.9410 0.4457 0.335 Uiso 0.25 1 calc PR E 2
 
loop_
 _atom_site_aniso_label
 _atom_site_aniso_U_11
 _atom_site_aniso_U_22
 _atom_site_aniso_U_33
 _atom_site_aniso_U_23
 _atom_site_aniso_U_13
 _atom_site_aniso_U_12
Ca1 0.0458(4) 0.0641(4) 0.0488(4) -0.0231(3) -0.0079(3) 0.0036(3)
Ca2 0.0519(4) 0.0473(4) 0.0341(3) -0.0157(3) -0.0144(3) 0.0094(3)
Li1 0.056(3) 0.057(3) 0.040(3) -0.012(3) -0.012(2) -0.002(3)
Li2 0.050(3) 0.057(4) 0.063(4) -0.008(3) -0.008(3) 0.019(3)
Si1 0.0543(6) 0.0722(7) 0.0564(6) -0.0320(5) -0.0026(5) 0.0004(5)
Si2 0.0493(6) 0.1075(10) 0.0851(9) -0.0437(8) -0.0015(6) -0.0194(6)
Si3 0.1419(13) 0.0908(9) 0.0648(8) -0.0407(7) -0.0434(8) 0.0495(9)
Si4 0.0896(8) 0.0712(7) 0.0667(7) -0.0345(6) -0.0118(6) 0.0159(6)
Si5 0.0517(5) 0.0572(6) 0.0638(7) -0.0088(5) -0.0035(5) -0.0052(5)
Si6 0.0653(7) 0.0943(9) 0.0564(7) 0.0147(6) -0.0191(5) -0.0188(6)
Si7 0.0360(4) 0.0650(6) 0.0422(5) -0.0186(4) -0.0104(4) -0.0027(4)
Si8 0.0415(4) 0.0558(5) 0.0311(4) -0.0062(4) -0.0079(3) -0.0026(4)
Si9 0.0366(4) 0.0411(4) 0.0402(4) -0.0170(4) -0.0060(3) -0.0024(3)
Si10 0.0450(5) 0.0431(5) 0.0438(5) -0.0067(4) -0.0047(4) -0.0069(4)
Si11 0.0456(4) 0.0439(5) 0.0337(4) -0.0153(4) -0.0071(3) 0.0004(4)
Si12 0.0423(4) 0.0395(4) 0.0401(5) -0.0107(4) 0.0044(3) -0.0016(3)
N1 0.0390(13) 0.0511(15) 0.0327(13) -0.0121(11) -0.0062(10) 0.0058(11)
N2 0.0355(12) 0.0464(14) 0.0370(13) -0.0128(11) -0.0090(10) 0.0058(11)
N3 0.0469(14) 0.0376(13) 0.0370(13) -0.0075(11) -0.0032(11) -0.0132(11)
N4 0.0395(12) 0.0333(12) 0.0387(13) -0.0096(10) -0.0026(10) -0.0066(10)
N5 0.0370(13) 0.0511(15) 0.0427(14) -0.0158(12) -0.0031(11) -0.0035(11)
N6 0.0444(14) 0.0501(15) 0.0433(15) -0.0164(12) -0.0031(11) -0.0043(12)
N7 0.0392(12) 0.0376(13) 0.0257(11) -0.0077(10) -0.0034(9) -0.0015(10)
N8 0.0415(13) 0.0390(13) 0.0265(12) -0.0090(10) -0.0016(9) -0.0075(10)
N9 0.0446(15) 0.075(2) 0.0575(18) -0.0303(16) -0.0008(13) -0.0031(14)
N10 0.076(2) 0.071(2) 0.0551(18) -0.0303(16) -0.0112(16) 0.0180(17)
N11 0.0510(16) 0.0537(17) 0.0529(17) -0.0036(14) -0.0112(13) -0.0070(13)
N12 0.0382(13) 0.0535(15) 0.0318(13) -0.0106(11) -0.0068(10) -0.0017(11)
N13 0.0387(12) 0.0392(13) 0.0375(13) -0.0110(11) -0.0061(10) -0.0035(10)
N14 0.0407(13) 0.0414(13) 0.0317(12) -0.0106(11) -0.0010(10) -0.0002(11)
C1 0.0397(15) 0.0394(16) 0.0321(15) -0.0067(12) -0.0040(12) 0.0043(12)
C2 0.0507(18) 0.072(2) 0.0358(17) -0.0174(16) -0.0149(14) 0.0105(16)
C3 0.0478(18) 0.069(2) 0.0448(18) -0.0209(17) -0.0178(15) 0.0093(16)
C4 0.0424(16) 0.0562(19) 0.0292(15) -0.0073(14) -0.0027(12) 0.0042(14)
C5 0.0447(17) 0.062(2) 0.0375(17) -0.0172(15) 0.0026(13) 0.0035(15)
C6 0.052(2) 0.070(2) 0.053(2) -0.0161(18) 0.0104(16) 0.0050(18)
C7 0.049(2) 0.087(3) 0.055(2) -0.009(2) 0.0108(17) -0.006(2)
C8 0.056(2) 0.064(2) 0.054(2) -0.0007(18) 0.0011(17) -0.0087(18)
C9 0.0500(18) 0.058(2) 0.0360(17) -0.0023(15) -0.0058(14) -0.0007(16)
C10 0.0485(18) 0.060(2) 0.051(2) -0.0211(17) 0.0068(15) 0.0027(16)
C11 0.077(3) 0.068(3) 0.079(3) -0.030(2) -0.016(2) 0.005(2)
C12 0.067(2) 0.060(2) 0.059(2) -0.0201(19) -0.0007(18) 0.0081(18)
C13 0.065(2) 0.051(2) 0.049(2) -0.0023(16) -0.0117(17) -0.0016(17)
C14 0.098(3) 0.069(3) 0.067(3) 0.009(2) -0.015(2) 0.003(2)
C15 0.133(5) 0.082(3) 0.091(4) -0.037(3) -0.046(3) 0.023(3)
C16 0.0332(14) 0.0519(18) 0.0390(16) -0.0114(14) -0.0080(12) 0.0083(13)
C17 0.0404(16) 0.056(2) 0.0445(18) -0.0149(15) -0.0119(13) 0.0070(14)
C18 0.052(2) 0.073(2) 0.056(2) -0.029(2) -0.0070(17) 0.0166(18)
C19 0.050(2) 0.091(3) 0.051(2) -0.016(2) 0.0042(17) 0.008(2)
C20 0.0451(18) 0.074(3) 0.057(2) -0.0074(19) -0.0024(16) -0.0044(18)
C21 0.0413(17) 0.055(2) 0.0505(19) -0.0059(16) -0.0079(14) 0.0026(15)
C22 0.0488(18) 0.0492(19) 0.062(2) -0.0207(17) -0.0124(16) 0.0064(15)
C23 0.112(4) 0.071(3) 0.085(3) 0.010(3) -0.033(3) -0.020(3)
C24 0.113(4) 0.084(3) 0.111(4) -0.051(3) -0.014(3) -0.005(3)
C25 0.071(2) 0.053(2) 0.067(3) -0.0151(19) -0.004(2) -0.0031(18)
C26 0.106(4) 0.110(5) 0.175(7) -0.076(5) -0.005(4) -0.026(4)
C27 0.179(7) 0.076(3) 0.143(6) -0.035(4) -0.077(5) 0.056(4)
C28 0.0400(15) 0.0335(15) 0.0408(16) -0.0084(13) -0.0026(12) -0.0072(12)
C29 0.0606(19) 0.0430(17) 0.0361(16) -0.0094(14) -0.0050(14) -0.0158(15)
C30 0.0507(17) 0.0455(17) 0.0427(17) -0.0163(14) -0.0083(14) -0.0113(14)
C31 0.0499(17) 0.0436(17) 0.0358(16) -0.0050(13) -0.0021(13) -0.0197(14)
C32 0.055(2) 0.058(2) 0.055(2) -0.0157(17) 0.0037(16) -0.0164(17)
C33 0.053(2) 0.073(3) 0.072(3) -0.022(2) 0.0090(18) -0.0239(19)
C34 0.067(3) 0.080(3) 0.075(3) -0.022(2) 0.004(2) -0.040(2)
C35 0.072(2) 0.059(2) 0.054(2) -0.0175(18) -0.0053(18) -0.0297(19)
C36 0.0565(19) 0.0483(18) 0.0365(16) -0.0102(14) -0.0070(14) -0.0174(15)
C37 0.056(2) 0.067(3) 0.090(3) -0.030(2) 0.014(2) -0.0126(19)
C38 0.211(8) 0.074(4) 0.126(5) -0.024(4) -0.078(5) 0.032(4)
C39 0.117(4) 0.099(4) 0.114(4) -0.065(4) -0.028(3) 0.014(3)
C40 0.061(2) 0.0483(19) 0.057(2) -0.0208(16) -0.0090(16) -0.0135(16)
C41 0.107(4) 0.079(3) 0.051(2) -0.021(2) 0.005(2) 0.009(3)
C42 0.081(3) 0.077(3) 0.090(3) -0.004(3) -0.016(3) 0.006(2)
C43 0.0389(15) 0.0325(15) 0.0433(17) -0.0045(12) -0.0052(13) -0.0097(12)
C44 0.0507(18) 0.0370(17) 0.062(2) -0.0102(15) -0.0014(16) -0.0062(14)
C45 0.070(2) 0.0362(18) 0.075(3) -0.0041(17) -0.012(2) -0.0122(17)
C46 0.056(2) 0.056(2) 0.060(2) 0.0071(18) -0.0054(18) -0.0234(18)
C47 0.0454(18) 0.061(2) 0.0475(19) -0.0039(16) 0.0011(15) -0.0118(16)
C48 0.0373(15) 0.0437(17) 0.0405(16) -0.0066(13) -0.0062(12) -0.0053(13)
C49 0.091(3) 0.0377(19) 0.097(3) -0.022(2) 0.017(3) -0.001(2)
C50 0.169(6) 0.108(4) 0.092(4) -0.048(4) -0.002(4) 0.021(4)
C51 0.077(4) 0.322(13) 0.215(9) -0.155(9) -0.025(5) 0.089(6)
C52 0.0504(18) 0.0498(19) 0.0486(19) -0.0168(16) 0.0012(15) -0.0016(15)
C53 0.056(2) 0.077(3) 0.095(3) -0.044(3) -0.016(2) 0.012(2)
C54 0.067(2) 0.080(3) 0.095(3) -0.048(3) -0.018(2) -0.003(2)
C55 0.0387(15) 0.0491(17) 0.0367(16) -0.0157(14) 0.0003(12) -0.0103(13)
C56 0.054(2) 0.057(2) 0.060(2) -0.0260(18) 0.0015(17) -0.0037(17)
C57 0.0468(18) 0.061(2) 0.057(2) -0.0182(18) -0.0121(16) 0.0006(16)
C58 0.0463(17) 0.059(2) 0.0416(17) -0.0178(15) -0.0136(14) 0.0034(15)
C59 0.062(2) 0.057(2) 0.0408(18) -0.0084(16) -0.0031(16) 0.0002(17)
C60 0.094(3) 0.074(3) 0.0362(19) -0.0111(18) -0.0036(19) 0.003(2)
C61 0.101(3) 0.079(3) 0.046(2) -0.026(2) -0.022(2) 0.000(3)
C62 0.065(2) 0.084(3) 0.063(2) -0.034(2) -0.025(2) -0.003(2)
C63 0.0424(17) 0.071(2) 0.053(2) -0.0263(18) -0.0143(15) -0.0010(16)
C64 0.069(2) 0.059(2) 0.050(2) -0.0096(17) 0.0100(18) -0.0081(19)
C65 0.154(5) 0.076(3) 0.072(3) 0.005(3) 0.015(3) -0.035(3)
C66 0.067(3) 0.075(3) 0.115(4) -0.022(3) 0.003(3) -0.017(2)
C67 0.0445(19) 0.096(3) 0.081(3) -0.050(2) 0.0046(18) -0.026(2)
C68 0.063(3) 0.084(3) 0.182(6) -0.041(4) 0.024(3) -0.004(3)
C69 0.063(2) 0.087(3) 0.074(3) -0.019(2) -0.001(2) -0.004(2)
C70 0.0561(19) 0.056(2) 0.0436(18) -0.0260(16) -0.0029(15) 0.0044(16)
C71 0.069(2) 0.052(2) 0.0465(19) -0.0217(16) 0.0039(17) 0.0073(17)
C72 0.089(3) 0.064(2) 0.048(2) -0.0244(19) 0.0025(19) 0.007(2)
C73 0.104(3) 0.079(3) 0.046(2) -0.031(2) -0.019(2) 0.019(3)
C74 0.077(3) 0.072(3) 0.066(3) -0.039(2) -0.020(2) 0.002(2)
C75 0.064(2) 0.061(2) 0.050(2) -0.0285(18) -0.0082(17) -0.0052(17)
C76 0.082(3) 0.060(2) 0.062(2) -0.024(2) 0.020(2) -0.012(2)
C77 0.138(5) 0.075(3) 0.084(4) -0.014(3) 0.025(3) -0.022(3)
C78 0.073(3) 0.085(3) 0.113(4) -0.032(3) 0.016(3) -0.018(3)
C79 0.070(2) 0.076(3) 0.059(2) -0.022(2) -0.0124(19) -0.023(2)
C80 0.145(5) 0.072(3) 0.092(4) -0.006(3) -0.025(4) -0.025(3)
C81 0.081(3) 0.130(5) 0.098(4) -0.032(4) 0.009(3) -0.027(3)
C82 0.0454(15) 0.0362(15) 0.0285(14) -0.0111(12) -0.0006(12) -0.0050(12)
C83 0.0426(15) 0.0448(17) 0.0313(15) -0.0101(13) -0.0046(12) 0.0043(13)
C84 0.0441(16) 0.0456(17) 0.0289(14) -0.0043(13) -0.0080(12) -0.0011(13)
C85 0.0413(15) 0.0382(15) 0.0275(14) -0.0073(12) -0.0007(11) 0.0038(12)
C86 0.0505(17) 0.0420(16) 0.0295(14) -0.0094(13) -0.0048(13) 0.0033(13)
C87 0.069(2) 0.058(2) 0.0299(16) -0.0095(15) -0.0067(15) -0.0063(17)
C88 0.071(2) 0.060(2) 0.0270(16) -0.0023(15) 0.0037(15) -0.0066(18)
C89 0.0515(18) 0.054(2) 0.0386(17) -0.0039(15) 0.0026(14) -0.0067(15)
C90 0.0446(16) 0.0437(17) 0.0333(15) -0.0069(13) -0.0022(12) 0.0003(13)
C91 0.0514(18) 0.0546(19) 0.0341(16) -0.0106(14) -0.0093(13) -0.0043(15)
C92 0.124(4) 0.068(3) 0.066(3) -0.032(2) 0.020(3) -0.040(3)
C93 0.057(2) 0.082(3) 0.139(5) -0.027(3) -0.023(3) -0.004(2)
C94 0.059(2) 0.061(2) 0.0415(18) -0.0034(16) -0.0074(15) -0.0194(17)
C95 0.057(2) 0.086(3) 0.074(3) -0.011(2) -0.016(2) -0.011(2)
C96 0.087(3) 0.080(3) 0.061(2) -0.031(2) 0.007(2) -0.032(2)
C97 0.0470(16) 0.0418(16) 0.0274(14) -0.0119(12) 0.0002(12) -0.0042(13)
C98 0.0443(16) 0.0483(17) 0.0324(15) -0.0116(13) -0.0026(12) -0.0049(13)
C99 0.0455(17) 0.076(2) 0.0403(18) -0.0193(17) 0.0053(14) -0.0094(17)
C100 0.064(2) 0.090(3) 0.0408(19) -0.034(2) 0.0077(16) -0.007(2)
C101 0.058(2) 0.082(3) 0.0424(19) -0.0338(19) 0.0001(15) -0.0077(19)
C102 0.0496(18) 0.062(2) 0.0396(17) -0.0237(16) 0.0001(14) -0.0109(15)
C103 0.0469(17) 0.059(2) 0.0441(18) -0.0202(16) -0.0010(14) -0.0127(15)
C104 0.062(2) 0.064(2) 0.062(2) -0.0239(19) 0.0007(18) -0.0167(18)
C105 0.082(3) 0.077(3) 0.063(3) -0.017(2) -0.029(2) -0.013(2)
C106 0.061(2) 0.084(3) 0.051(2) -0.040(2) 0.0080(17) -0.029(2)
C107 0.111(4) 0.086(3) 0.067(3) -0.032(2) 0.013(3) -0.043(3)
C108 0.053(2) 0.127(4) 0.089(3) -0.059(3) -0.001(2) -0.014(2)
C109 0.068(2) 0.067(3) 0.092(3) -0.038(2) -0.005(2) -0.011(2)
C110 0.080(3) 0.105(4) 0.067(3) -0.043(3) -0.011(2) 0.008(3)
C111 0.073(3) 0.086(3) 0.072(3) -0.033(2) -0.003(2) 0.012(2)
C112 0.102(4) 0.270(10) 0.116(5) -0.079(6) 0.033(4) -0.100(6)
C113 0.074(3) 0.131(5) 0.212(8) -0.066(5) -0.064(4) 0.006(3)
C114 0.081(3) 0.092(3) 0.102(4) -0.031(3) -0.023(3) -0.027(3)
C115 0.088(3) 0.068(3) 0.084(3) -0.028(2) -0.015(2) 0.012(2)
C116 0.42(7) 0.24(4) 0.044(9) 0.027(15) 0.04(2) 0.23(4)
C117 0.16(2) 0.095(12) 0.16(2) -0.048(14) -0.116(19) 0.034(12)
C216 0.095(7) 0.099(7) 0.053(5) -0.016(5) 0.007(5) -0.014(6)
C217 0.085(7) 0.088(7) 0.082(7) -0.031(5) -0.030(6) 0.001(5)
C118 0.153(6) 0.107(4) 0.119(5) -0.068(4) -0.046(4) 0.014(4)
C119 0.132(5) 0.096(4) 0.109(4) -0.030(3) 0.024(4) 0.034(4)
C120 0.105(4) 0.080(3) 0.086(3) -0.030(3) -0.018(3) 0.020(3)
C121 0.103(4) 0.097(4) 0.068(3) 0.008(3) 0.000(3) -0.033(3)
C123 0.069(3) 0.092(4) 0.150(5) -0.048(4) 0.011(3) 0.000(3)
C124 0.059(2) 0.061(2) 0.095(3) -0.011(2) -0.009(2) -0.0122(19)
C125 0.115(19) 0.20(3) 0.049(11) -0.050(16) -0.014(10) -0.060(18)
C126 0.068(10) 0.095(12) 0.061(8) -0.003(9) -0.003(6) 0.028(8)
C225 0.108(14) 0.31(4) 0.050(7) 0.019(12) -0.019(8) -0.11(2)
C226 0.111(13) 0.149(19) 0.30(3) 0.15(2) -0.084(17) -0.016(12)
C127 0.081(3) 0.071(3) 0.064(3) 0.008(2) -0.011(2) -0.022(2)
C128 0.060(2) 0.078(3) 0.053(2) -0.0184(19) 0.0001(17) -0.027(2)
C129 0.051(2) 0.108(4) 0.127(4) -0.059(3) -0.040(3) 0.013(2)
C130 0.074(2) 0.071(2) 0.0416(19) -0.0211(18) -0.0134(17) -0.002(2)
C131 0.062(2) 0.065(2) 0.061(2) -0.0099(19) -0.0134(18) 0.0106(19)
C132 0.065(2) 0.078(3) 0.0345(18) -0.0070(17) -0.0068(16) -0.0142(19)
C133 0.058(2) 0.061(2) 0.0469(19) -0.0105(17) -0.0172(16) -0.0070(17)
C134 0.0431(16) 0.057(2) 0.0423(17) -0.0158(15) -0.0037(13) -0.0039(14)
C136 0.064(2) 0.061(2) 0.062(2) -0.0364(19) -0.0137(18) -0.0005(17)
C137 0.0414(17) 0.056(2) 0.060(2) -0.0182(17) -0.0073(15) 0.0000(15)
C138 0.066(2) 0.079(3) 0.052(2) -0.002(2) -0.0174(19) -0.002(2)
C139 0.140(5) 0.051(2) 0.083(3) -0.007(2) 0.004(3) -0.037(3)
C140 0.052(2) 0.114(4) 0.048(2) 0.003(2) 0.0046(17) -0.002(2)
C141 0.072(2) 0.055(2) 0.073(3) -0.030(2) -0.015(2) -0.0060(18)
C142 0.0417(16) 0.058(2) 0.0426(17) -0.0170(15) -0.0069(13) -0.0019(14)
C143 0.070(2) 0.079(3) 0.0401(19) -0.0229(18) -0.0163(17) 0.017(2)
C144 0.058(2) 0.086(3) 0.0452(19) -0.0340(19) 0.0069(16) -0.0178(19)
C145 0.0447(17) 0.074(2) 0.0404(18) -0.0136(17) 0.0004(14) -0.0039(16)
C146 0.065(3) 0.048(2) 0.120(4) -0.018(2) 0.005(2) 0.0086(19)
C147 0.075(10) 0.38(4) 0.30(3) -0.28(4) 0.040(13) -0.041(16)
C148 0.054(5) 0.093(7) 0.069(6) -0.037(6) -0.010(4) -0.028(5)
C149 0.139(14) 0.056(7) 0.084(10) -0.002(6) -0.068(10) -0.025(8)
C150 0.078(6) 0.095(8) 0.071(6) -0.034(6) -0.006(5) -0.026(6)
C151 0.055(5) 0.136(10) 0.062(6) -0.051(7) 0.004(4) -0.045(7)
C152 0.117(16) 0.069(8) 0.122(14) -0.037(9) -0.073(13) 0.003(9)
C153 0.125(12) 0.067(6) 0.039(6) 0.008(5) -0.023(6) -0.053(8)
C247 0.098(11) 0.131(16) 0.21(2) -0.019(17) -0.038(16) -0.043(11)
C248 0.101(10) 0.103(10) 0.155(15) -0.056(10) -0.076(10) 0.001(8)
C249 0.111(9) 0.068(8) 0.085(9) -0.012(7) -0.054(8) -0.021(7)
C250 0.21(2) 0.145(15) 0.097(13) -0.027(12) -0.061(15) -0.076(16)
C251 0.071(12) 0.128(13) 0.175(19) -0.113(14) -0.039(13) 0.003(8)
C252 0.119(10) 0.122(12) 0.098(9) -0.037(9) -0.029(8) -0.043(9)
C253 0.148(15) 0.097(10) 0.077(9) 0.012(8) -0.046(9) -0.077(12)
C154 0.138(13) 0.083(9) 0.112(14) -0.022(8) -0.027(10) 0.025(9)
C155 0.162(16) 0.095(10) 0.090(9) -0.032(7) -0.026(10) -0.016(10)
C156 0.107(9) 0.071(8) 0.074(8) -0.002(7) -0.014(8) -0.019(7)
C254 0.25(3) 0.17(2) 0.16(2) -0.077(18) -0.04(2) 0.05(2)
C255 0.32(6) 0.20(4) 0.21(4) 0.02(3) 0.15(4) 0.10(4)
C256 0.30(4) 0.24(3) 0.153(18) -0.081(19) -0.03(2) -0.15(3)
C257 0.39(10) 0.18(5) 0.09(3) 0.01(3) -0.08(4) -0.15(6)
 
_geom_special_details
;
 All esds (except the esd in the dihedral angle between two l.s. planes)
 are estimated using the full covariance matrix.  The cell esds are taken
 into account individually in the estimation of esds in distances, angles
 and torsion angles; correlations between esds in cell parameters are only
 used when they are defined by crystal symmetry.  An approximate (isotropic)
 treatment of cell esds is used for estimating esds involving l.s. planes.
;
 
loop_
 _geom_bond_atom_site_label_1
 _geom_bond_atom_site_label_2
 _geom_bond_distance
 _geom_bond_site_symmetry_2
 _geom_bond_publ_flag
Ca1 N9 2.308(3) . ?
Ca1 N11 2.312(3) . ?
Ca1 N10 2.326(3) . ?
Ca1 Si6 3.3581(13) . ?
Ca1 Si3 3.3995(15) . ?
Ca1 Si1 3.4070(12) . ?
Ca1 Si2 3.4202(13) . ?
Ca1 Si4 3.4277(13) . ?
Ca1 Si5 3.4467(13) . ?
Ca2 N12 2.302(2) . ?
Ca2 N13 2.313(2) . ?
Ca2 N14 2.318(2) . ?
Ca2 Si7 3.4032(10) . ?
Ca2 Si12 3.4049(10) . ?
Ca2 Si11 3.4077(10) . ?
Ca2 Si8 3.4096(11) . ?
Ca2 Si10 3.4158(11) . ?
Ca2 Si9 3.4335(10) . ?
Li1 C28 2.128(6) . ?
Li1 C1 2.132(6) . ?
Li2 C82 2.167(6) . ?
Li2 C55 2.179(6) . ?
Si1 N9 1.692(3) . ?
Si1 C109 1.876(4) . ?
Si1 C111 1.877(4) . ?
Si1 C110 1.885(5) . ?
Si2 N9 1.673(3) . ?
Si2 C114 1.870(5) . ?
Si2 C113 1.872(6) . ?
Si2 C112 1.902(7) . ?
Si3 C116 1.61(2) . ?
Si3 N10 1.683(4) . ?
Si3 C217 1.779(9) . ?
Si3 C115 1.849(5) . ?
Si3 C216 2.024(11) . ?
Si3 C117 2.25(3) . ?
Si4 N10 1.687(3) . ?
Si4 C119 1.870(6) . ?
Si4 C120 1.876(5) . ?
Si4 C118 1.879(6) . ?
Si5 N11 1.678(3) . ?
Si5 C124 1.865(5) . ?
Si5 C123 1.873(5) . ?
Si5 C121 1.875(5) . ?
Si6 N11 1.669(3) . ?
Si6 C226 1.76(2) . ?
Si6 C125 1.85(2) . ?
Si6 C127 1.888(4) . ?
Si6 C225 1.96(3) . ?
Si6 C126 1.99(2) . ?
Si7 N12 1.685(3) . ?
Si7 C130 1.879(4) . ?
Si7 C128 1.883(4) . ?
Si7 C129 1.885(4) . ?
Si8 N12 1.689(3) . ?
Si8 C132 1.870(3) . ?
Si8 C131 1.881(4) . ?
Si8 C133 1.882(3) . ?
Si9 N13 1.681(3) . ?
Si9 C136 1.876(3) . ?
Si9 C134 1.876(3) . ?
Si9 C137 1.882(3) . ?
Si10 N13 1.686(3) . ?
Si10 C138 1.872(4) . ?
Si10 C140 1.875(4) . ?
Si10 C139 1.875(5) . ?
Si11 N14 1.682(3) . ?
Si11 C143 1.883(4) . ?
Si11 C142 1.883(3) . ?
Si11 C141 1.886(4) . ?
Si12 N14 1.686(2) . ?
Si12 C144 1.869(4) . ?
Si12 C145 1.873(4) . ?
Si12 C146 1.882(4) . ?
N1 C1 1.367(4) . ?
N1 C2 1.387(4) . ?
N1 C4 1.451(4) . ?
N2 C1 1.363(4) . ?
N2 C3 1.378(4) . ?
N2 C16 1.448(4) . ?
N3 C28 1.360(4) . ?
N3 C29 1.386(4) . ?
N3 C31 1.446(4) . ?
N4 C28 1.370(4) . ?
N4 C30 1.379(4) . ?
N4 C43 1.445(4) . ?
N5 C55 1.360(4) . ?
N5 C57 1.377(4) . ?
N5 C58 1.449(4) . ?
N6 C55 1.357(4) . ?
N6 C56 1.364(5) . ?
N6 C70 1.438(4) . ?
N7 C82 1.367(4) . ?
N7 C83 1.385(4) . ?
N7 C85 1.445(3) . ?
N8 C82 1.366(4) . ?
N8 C84 1.375(4) . ?
N8 C97 1.450(3) . ?
C2 C3 1.333(5) . ?
C2 H2 0.9500 . ?
C3 H3 0.9500 . ?
C4 C9 1.392(5) . ?
C4 C5 1.397(5) . ?
C5 C6 1.396(5) . ?
C5 C10 1.525(5) . ?
C6 C7 1.380(6) . ?
C6 H6 0.9500 . ?
C7 C8 1.383(6) . ?
C7 H7 0.9500 . ?
C8 C9 1.395(5) . ?
C8 H8 0.9500 . ?
C9 C13 1.513(5) . ?
C10 C12 1.524(5) . ?
C10 C11 1.539(6) . ?
C10 H10 1.0000 . ?
C11 H11A 0.9800 . ?
C11 H11B 0.9800 . ?
C11 H11C 0.9800 . ?
C12 H12A 0.9800 . ?
C12 H12B 0.9800 . ?
C12 H12C 0.9800 . ?
C13 C15 1.517(6) . ?
C13 C14 1.526(5) . ?
C13 H13 1.0000 . ?
C14 H14A 0.9800 . ?
C14 H14B 0.9800 . ?
C14 H14C 0.9800 . ?
C15 H15A 0.9800 . ?
C15 H15B 0.9800 . ?
C15 H15C 0.9800 . ?
C16 C21 1.397(5) . ?
C16 C17 1.402(5) . ?
C17 C18 1.392(5) . ?
C17 C22 1.521(5) . ?
C18 C19 1.370(6) . ?
C18 H18 0.9500 . ?
C19 C20 1.375(6) . ?
C19 H19 0.9500 . ?
C20 C21 1.394(5) . ?
C20 H20 0.9500 . ?
C21 C25 1.518(5) . ?
C22 C23 1.507(6) . ?
C22 C24 1.509(6) . ?
C22 H22 1.0000 . ?
C23 H23A 0.9800 . ?
C23 H23B 0.9800 . ?
C23 H23C 0.9800 . ?
C24 H24A 0.9800 . ?
C24 H24B 0.9800 . ?
C24 H24C 0.9800 . ?
C25 C26 1.513(7) . ?
C25 C27 1.523(7) . ?
C25 H25 1.0000 . ?
C26 H26A 0.9800 . ?
C26 H26B 0.9800 . ?
C26 H26C 0.9800 . ?
C27 H27A 0.9800 . ?
C27 H27B 0.9800 . ?
C27 H27C 0.9800 . ?
C29 C30 1.339(4) . ?
C29 H29 0.9500 . ?
C30 H30 0.9500 . ?
C31 C32 1.383(5) . ?
C31 C36 1.397(5) . ?
C32 C33 1.399(5) . ?
C32 C37 1.513(6) . ?
C33 C34 1.361(6) . ?
C33 H33 0.9500 . ?
C34 C35 1.379(6) . ?
C34 H34 0.9500 . ?
C35 C36 1.396(5) . ?
C35 H35 0.9500 . ?
C36 C40 1.504(5) . ?
C37 C38 1.484(7) . ?
C37 C39 1.527(7) . ?
C37 H37 1.0000 . ?
C38 H38A 0.9800 . ?
C38 H38B 0.9800 . ?
C38 H38C 0.9800 . ?
C39 H39A 0.9800 . ?
C39 H39B 0.9800 . ?
C39 H39C 0.9800 . ?
C40 C41 1.512(5) . ?
C40 C42 1.533(6) . ?
C40 H40 1.0000 . ?
C41 H41A 0.9800 . ?
C41 H41B 0.9800 . ?
C41 H41C 0.9800 . ?
C42 H42A 0.9800 . ?
C42 H42B 0.9800 . ?
C42 H42C 0.9800 . ?
C43 C48 1.388(4) . ?
C43 C44 1.394(4) . ?
C44 C45 1.389(5) . ?
C44 C49 1.512(5) . ?
C45 C46 1.373(6) . ?
C45 H45 0.9500 . ?
C46 C47 1.363(5) . ?
C46 H46 0.9500 . ?
C47 C48 1.396(4) . ?
C47 H47 0.9500 . ?
C48 C52 1.507(5) . ?
C49 C51 1.463(9) . ?
C49 C50 1.559(8) . ?
C49 H49 1.0000 . ?
C50 H50A 0.9800 . ?
C50 H50B 0.9800 . ?
C50 H50C 0.9800 . ?
C51 H51A 0.9800 . ?
C51 H51B 0.9800 . ?
C51 H51C 0.9800 . ?
C52 C53 1.523(5) . ?
C52 C54 1.528(5) . ?
C52 H52 1.0000 . ?
C53 H53A 0.9800 . ?
C53 H53B 0.9800 . ?
C53 H53C 0.9800 . ?
C54 H54A 0.9800 . ?
C54 H54B 0.9800 . ?
C54 H54C 0.9800 . ?
C56 C57 1.340(5) . ?
C56 H56 0.9500 . ?
C57 H57 0.9500 . ?
C58 C59 1.397(5) . ?
C58 C63 1.404(5) . ?
C59 C60 1.394(5) . ?
C59 C64 1.518(5) . ?
C60 C61 1.378(6) . ?
C60 H60 0.9500 . ?
C61 C62 1.368(6) . ?
C61 H61 0.9500 . ?
C62 C63 1.388(5) . ?
C62 H62 0.9500 . ?
C63 C67 1.532(5) . ?
C64 C66 1.512(6) . ?
C64 C65 1.543(6) . ?
C64 H64 1.0000 . ?
C65 H65A 0.9800 . ?
C65 H65B 0.9800 . ?
C65 H65C 0.9800 . ?
C66 H66A 0.9800 . ?
C66 H66B 0.9800 . ?
C66 H66C 0.9800 . ?
C67 C68 1.509(6) . ?
C67 C69 1.531(6) . ?
C67 H67 1.0000 . ?
C68 H68A 0.9800 . ?
C68 H68B 0.9800 . ?
C68 H68C 0.9800 . ?
C69 H69A 0.9800 . ?
C69 H69B 0.9800 . ?
C69 H69C 0.9800 . ?
C70 C75 1.399(5) . ?
C70 C71 1.404(5) . ?
C71 C72 1.382(5) . ?
C71 C76 1.520(6) . ?
C72 C73 1.372(6) . ?
C72 H72 0.9500 . ?
C73 C74 1.374(6) . ?
C73 H73 0.9500 . ?
C74 C75 1.390(5) . ?
C74 H74 0.9500 . ?
C75 C79 1.512(6) . ?
C76 C77 1.516(6) . ?
C76 C78 1.528(7) . ?
C76 H76 1.0000 . ?
C77 H77A 0.9800 . ?
C77 H77B 0.9800 . ?
C77 H77C 0.9800 . ?
C78 H78A 0.9800 . ?
C78 H78B 0.9800 . ?
C78 H78C 0.9800 . ?
C79 C81 1.512(7) . ?
C79 C80 1.544(7) . ?
C79 H79 1.0000 . ?
C80 H80A 0.9800 . ?
C80 H80B 0.9800 . ?
C80 H80C 0.9800 . ?
C81 H81A 0.9800 . ?
C81 H81B 0.9800 . ?
C81 H81C 0.9800 . ?
C83 C84 1.342(4) . ?
C83 H83 0.9500 . ?
C84 H84 0.9500 . ?
C85 C86 1.387(4) . ?
C85 C90 1.397(4) . ?
C86 C87 1.406(4) . ?
C86 C91 1.519(5) . ?
C87 C88 1.379(5) . ?
C87 H87 0.9500 . ?
C88 C89 1.374(5) . ?
C88 H88 0.9500 . ?
C89 C90 1.401(4) . ?
C89 H89 0.9500 . ?
C90 C94 1.518(5) . ?
C91 C93 1.515(5) . ?
C91 C92 1.522(5) . ?
C91 H91 1.0000 . ?
C92 H92A 0.9800 . ?
C92 H92B 0.9800 . ?
C92 H92C 0.9800 . ?
C93 H93A 0.9800 . ?
C93 H93B 0.9800 . ?
C93 H93C 0.9800 . ?
C94 C96 1.518(6) . ?
C94 C95 1.545(5) . ?
C94 H94 1.0000 . ?
C95 H95A 0.9800 . ?
C95 H95B 0.9800 . ?
C95 H95C 0.9800 . ?
C96 H96A 0.9800 . ?
C96 H96B 0.9800 . ?
C96 H96C 0.9800 . ?
C97 C98 1.387(4) . ?
C97 C102 1.401(4) . ?
C98 C99 1.385(4) . ?
C98 C103 1.519(4) . ?
C99 C100 1.390(5) . ?
C99 H99 0.9500 . ?
C100 C101 1.366(5) . ?
C100 H100 0.9500 . ?
C101 C102 1.390(4) . ?
C101 H101 0.9500 . ?
C102 C106 1.517(5) . ?
C103 C104 1.510(5) . ?
C103 C105 1.526(5) . ?
C103 H103 1.0000 . ?
C104 H10A 0.9800 . ?
C104 H10B 0.9800 . ?
C104 H10C 0.9800 . ?
C105 H10D 0.9800 . ?
C105 H10E 0.9800 . ?
C105 H10F 0.9800 . ?
C106 C107 1.513(6) . ?
C106 C108 1.532(6) . ?
C106 H106 1.0000 . ?
C107 H10G 0.9800 . ?
C107 H10H 0.9800 . ?
C107 H10I 0.9800 . ?
C108 H10J 0.9800 . ?
C108 H10K 0.9800 . ?
C108 H10L 0.9800 . ?
C109 H10M 0.9800 . ?
C109 H10N 0.9800 . ?
C109 H10O 0.9800 . ?
C110 H11D 0.9800 . ?
C110 H11E 0.9800 . ?
C110 H11F 0.9800 . ?
C111 H11G 0.9800 . ?
C111 H11H 0.9800 . ?
C111 H11I 0.9800 . ?
C112 H11J 0.9800 . ?
C112 H11K 0.9800 . ?
C112 H11L 0.9800 . ?
C113 H11M 0.9800 . ?
C113 H11N 0.9800 . ?
C113 H11O 0.9800 . ?
C114 H11P 0.9800 . ?
C114 H11Q 0.9800 . ?
C114 H11R 0.9800 . ?
C115 H11S 0.9800 . ?
C115 H11T 0.9800 . ?
C115 H11U 0.9800 . ?
C116 H11V 0.9800 . ?
C116 H11W 0.9800 . ?
C116 H11X 0.9800 . ?
C117 H11Y 0.9800 . ?
C117 H11Z 0.9800 . ?
C117 H011 0.9800 . ?
C216 H21A 0.9800 . ?
C216 H21B 0.9800 . ?
C216 H21C 0.9800 . ?
C217 H21D 0.9800 . ?
C217 H21E 0.9800 . ?
C217 H21F 0.9800 . ?
C118 H01B 0.9800 . ?
C118 H01C 0.9800 . ?
C118 H01D 0.9800 . ?
C119 H01E 0.9800 . ?
C119 H01F 0.9800 . ?
C119 H01G 0.9800 . ?
C120 H12D 0.9800 . ?
C120 H12E 0.9800 . ?
C120 H12F 0.9800 . ?
C121 H12G 0.9800 . ?
C121 H12H 0.9800 . ?
C121 H12I 0.9800 . ?
C123 H12J 0.9800 . ?
C123 H12K 0.9800 . ?
C123 H12L 0.9800 . ?
C124 H12M 0.9800 . ?
C124 H12N 0.9800 . ?
C124 H12O 0.9800 . ?
C125 H12P 0.9800 . ?
C125 H12Q 0.9800 . ?
C125 H12R 0.9800 . ?
C126 H12S 0.9800 . ?
C126 H12T 0.9800 . ?
C126 H12U 0.9800 . ?
C225 H22A 0.9800 . ?
C225 H22B 0.9800 . ?
C225 H22C 0.9800 . ?
C226 H22D 0.9800 . ?
C226 H22E 0.9800 . ?
C226 H22F 0.9800 . ?
C127 H12V 0.9800 . ?
C127 H12W 0.9800 . ?
C127 H12X 0.9800 . ?
C128 H12Y 0.9800 . ?
C128 H12Z 0.9800 . ?
C128 H012 0.9800 . ?
C129 H21G 0.9800 . ?
C129 H21H 0.9800 . ?
C129 H21I 0.9800 . ?
C130 H13A 0.9800 . ?
C130 H13B 0.9800 . ?
C130 H13C 0.9800 . ?
C131 H13D 0.9800 . ?
C131 H13E 0.9800 . ?
C131 H13F 0.9800 . ?
C132 H13G 0.9800 . ?
C132 H13H 0.9800 . ?
C132 H13I 0.9800 . ?
C133 H13J 0.9800 . ?
C133 H13K 0.9800 . ?
C133 H13L 0.9800 . ?
C134 H13M 0.9800 . ?
C134 H13N 0.9800 . ?
C134 H13O 0.9800 . ?
C136 H13P 0.9800 . ?
C136 H13Q 0.9800 . ?
C136 H13R 0.9800 . ?
C137 H13S 0.9800 . ?
C137 H13T 0.9800 . ?
C137 H13U 0.9800 . ?
C138 H13V 0.9800 . ?
C138 H13W 0.9800 . ?
C138 H13X 0.9800 . ?
C139 H13Y 0.9800 . ?
C139 H13Z 0.9800 . ?
C139 H013 0.9800 . ?
C140 H14D 0.9800 . ?
C140 H14E 0.9800 . ?
C140 H14F 0.9800 . ?
C141 H14G 0.9800 . ?
C141 H14H 0.9800 . ?
C141 H14I 0.9800 . ?
C142 H14J 0.9800 . ?
C142 H14K 0.9800 . ?
C142 H14L 0.9800 . ?
C143 H14M 0.9800 . ?
C143 H14N 0.9800 . ?
C143 H14O 0.9800 . ?
C144 H14P 0.9800 . ?
C144 H14Q 0.9800 . ?
C144 H14R 0.9800 . ?
C145 H14S 0.9800 . ?
C145 H14T 0.9800 . ?
C145 H14U 0.9800 . ?
C146 H14V 0.9800 . ?
C146 H14W 0.9800 . ?
C146 H14X 0.9800 . ?
C147 C148 1.59(2) . ?
C147 H14Y 0.9800 . ?
C147 H14Z 0.9800 . ?
C147 H014 0.9800 . ?
C148 C149 1.3900 . ?
C148 C153 1.3900 . ?
C149 C150 1.3900 . ?
C149 H149 0.9500 . ?
C150 C151 1.3900 . ?
C150 H150 0.9500 . ?
C151 C152 1.3900 . ?
C151 H151 0.9500 . ?
C152 C153 1.3900 . ?
C152 H152 0.9500 . ?
C153 H153 0.9500 . ?
C247 C248 1.34(3) . ?
C247 H24D 0.9800 . ?
C247 H24E 0.9800 . ?
C247 H24F 0.9800 . ?
C248 C249 1.3900 . ?
C248 C253 1.3900 . ?
C249 C250 1.3900 . ?
C249 H249 0.9500 . ?
C250 C251 1.3900 . ?
C250 H250 0.9500 . ?
C251 C252 1.3900 . ?
C251 H251 0.9500 . ?
C252 C253 1.3900 . ?
C252 H252 0.9500 . ?
C253 H253 0.9500 . ?
C154 C155 1.506(16) . ?
C154 H15D 0.9800 . ?
C154 H15E 0.9800 . ?
C154 H15F 0.9800 . ?
C155 C156 1.475(16) . ?
C155 H15G 0.9900 . ?
C155 H15H 0.9900 . ?
C156 C156 1.51(4) 2_676 ?
C156 H15I 0.9900 . ?
C156 H15J 0.9900 . ?
C254 C255 1.40(2) . ?
C254 C257 1.45(2) . ?
C254 C256 1.50(4) 2_676 ?
C255 C256 1.377(18) . ?
C255 H255 0.9500 . ?
C256 C254 1.50(4) 2_676 ?
C256 H256 0.9500 . ?
C257 H25A 0.9800 . ?
C257 H25B 0.9800 . ?
C257 H25C 0.9800 . ?
 
loop_
 _geom_angle_atom_site_label_1
 _geom_angle_atom_site_label_2
 _geom_angle_atom_site_label_3
 _geom_angle
 _geom_angle_site_symmetry_1
 _geom_angle_site_symmetry_3
 _geom_angle_publ_flag
N9 Ca1 N11 119.67(11) . . ?
N9 Ca1 N10 120.23(11) . . ?
N11 Ca1 N10 120.07(12) . . ?
N9 Ca1 Si6 102.77(8) . . ?
N11 Ca1 Si6 26.98(7) . . ?
N10 Ca1 Si6 132.65(9) . . ?
N9 Ca1 Si3 104.86(9) . . ?
N11 Ca1 Si3 129.00(9) . . ?
N10 Ca1 Si3 26.64(9) . . ?
Si6 Ca1 Si3 152.20(4) . . ?
N9 Ca1 Si1 26.53(8) . . ?
N11 Ca1 Si1 100.26(8) . . ?
N10 Ca1 Si1 134.68(8) . . ?
Si6 Ca1 Si1 92.68(4) . . ?
Si3 Ca1 Si1 110.92(4) . . ?
N9 Ca1 Si2 25.70(8) . . ?
N11 Ca1 Si2 133.73(8) . . ?
N10 Ca1 Si2 102.73(9) . . ?
Si6 Ca1 Si2 109.22(4) . . ?
Si3 Ca1 Si2 97.11(4) . . ?
Si1 Ca1 Si2 52.22(3) . . ?
N9 Ca1 Si4 131.66(8) . . ?
N11 Ca1 Si4 104.39(9) . . ?
N10 Ca1 Si4 26.14(8) . . ?
Si6 Ca1 Si4 108.82(4) . . ?
Si3 Ca1 Si4 52.74(3) . . ?
Si1 Ca1 Si4 155.32(4) . . ?
Si2 Ca1 Si4 107.40(4) . . ?
N9 Ca1 Si5 131.79(8) . . ?
N11 Ca1 Si5 25.29(7) . . ?
N10 Ca1 Si5 102.96(9) . . ?
Si6 Ca1 Si5 52.26(3) . . ?
Si3 Ca1 Si5 105.02(4) . . ?
Si1 Ca1 Si5 106.39(3) . . ?
Si2 Ca1 Si5 154.24(4) . . ?
Si4 Ca1 Si5 96.55(3) . . ?
N12 Ca2 N13 119.58(9) . . ?
N12 Ca2 N14 119.58(9) . . ?
N13 Ca2 N14 120.83(9) . . ?
N12 Ca2 Si7 26.34(7) . . ?
N13 Ca2 Si7 100.52(6) . . ?
N14 Ca2 Si7 134.41(7) . . ?
N12 Ca2 Si12 102.20(7) . . ?
N13 Ca2 Si12 133.10(7) . . ?
N14 Ca2 Si12 26.53(6) . . ?
Si7 Ca2 Si12 109.84(3) . . ?
N12 Ca2 Si11 131.52(7) . . ?
N13 Ca2 Si11 104.14(6) . . ?
N14 Ca2 Si11 26.36(6) . . ?
Si7 Ca2 Si11 155.24(3) . . ?
Si12 Ca2 Si11 52.89(2) . . ?
N12 Ca2 Si8 26.30(7) . . ?
N13 Ca2 Si8 134.08(7) . . ?
N14 Ca2 Si8 101.08(6) . . ?
Si7 Ca2 Si8 52.64(2) . . ?
Si12 Ca2 Si8 92.79(3) . . ?
Si11 Ca2 Si8 106.45(3) . . ?
N12 Ca2 Si10 134.22(7) . . ?
N13 Ca2 Si10 26.20(6) . . ?
N14 Ca2 Si10 101.89(6) . . ?
Si7 Ca2 Si10 109.06(3) . . ?
Si12 Ca2 Si10 107.87(3) . . ?
Si11 Ca2 Si10 94.26(3) . . ?
Si8 Ca2 Si10 157.03(3) . . ?
N12 Ca2 Si9 101.62(7) . . ?
N13 Ca2 Si9 25.70(6) . . ?
N14 Ca2 Si9 134.80(7) . . ?
Si7 Ca2 Si9 90.79(2) . . ?
Si12 Ca2 Si9 156.06(3) . . ?
Si11 Ca2 Si9 110.69(3) . . ?
Si8 Ca2 Si9 109.77(3) . . ?
Si10 Ca2 Si9 51.90(2) . . ?
C28 Li1 C1 176.4(3) . . ?
C82 Li2 C55 177.7(4) . . ?
N9 Si1 C109 110.06(17) . . ?
N9 Si1 C111 114.31(19) . . ?
C109 Si1 C111 106.9(2) . . ?
N9 Si1 C110 114.0(2) . . ?
C109 Si1 C110 104.6(2) . . ?
C111 Si1 C110 106.2(2) . . ?
N9 Si1 Ca1 37.54(10) . . ?
C109 Si1 Ca1 73.28(13) . . ?
C111 Si1 Ca1 134.47(15) . . ?
C110 Si1 Ca1 117.91(15) . . ?
N9 Si2 C114 110.57(19) . . ?
N9 Si2 C113 114.7(3) . . ?
C114 Si2 C113 105.3(3) . . ?
N9 Si2 C112 112.6(2) . . ?
C114 Si2 C112 103.5(4) . . ?
C113 Si2 C112 109.4(4) . . ?
N9 Si2 Ca1 36.75(10) . . ?
C114 Si2 Ca1 74.31(16) . . ?
C113 Si2 Ca1 120.8(3) . . ?
C112 Si2 Ca1 128.6(3) . . ?
C116 Si3 N10 119.0(8) . . ?
C116 Si3 C217 75(2) . . ?
N10 Si3 C217 120.6(5) . . ?
C116 Si3 C115 120.6(18) . . ?
N10 Si3 C115 109.9(2) . . ?
C217 Si3 C115 107.6(4) . . ?
C116 Si3 C216 31(3) . . ?
N10 Si3 C216 112.7(5) . . ?
C217 Si3 C216 103.5(6) . . ?
C115 Si3 C216 100.5(5) . . ?
C116 Si3 C117 104(2) . . ?
N10 Si3 C117 98.2(7) . . ?
C217 Si3 C117 30.6(6) . . ?
C115 Si3 C117 100.0(5) . . ?
C216 Si3 C117 134.0(9) . . ?
C116 Si3 Ca1 146.9(17) . . ?
N10 Si3 Ca1 38.30(11) . . ?
C217 Si3 Ca1 133.9(5) . . ?
C115 Si3 Ca1 71.64(16) . . ?
C216 Si3 Ca1 122.2(4) . . ?
C117 Si3 Ca1 103.3(8) . . ?
N10 Si4 C119 114.5(2) . . ?
N10 Si4 C120 109.9(2) . . ?
C119 Si4 C120 106.9(3) . . ?
N10 Si4 C118 114.5(2) . . ?
C119 Si4 C118 104.9(3) . . ?
C120 Si4 C118 105.4(3) . . ?
N10 Si4 Ca1 37.41(11) . . ?
C119 Si4 Ca1 123.4(2) . . ?
C120 Si4 Ca1 72.74(16) . . ?
C118 Si4 Ca1 130.4(2) . . ?
N11 Si5 C124 114.34(19) . . ?
N11 Si5 C123 114.9(2) . . ?
C124 Si5 C123 106.8(2) . . ?
N11 Si5 C121 109.5(2) . . ?
C124 Si5 C121 104.4(2) . . ?
C123 Si5 C121 106.1(3) . . ?
N11 Si5 Ca1 36.07(10) . . ?
C124 Si5 Ca1 124.92(14) . . ?
C123 Si5 Ca1 127.09(19) . . ?
C121 Si5 Ca1 73.46(17) . . ?
N11 Si6 C226 116.9(10) . . ?
N11 Si6 C125 120.2(14) . . ?
C226 Si6 C125 91(2) . . ?
N11 Si6 C127 110.62(18) . . ?
C226 Si6 C127 109.2(9) . . ?
C125 Si6 C127 106.8(11) . . ?
N11 Si6 C225 108.7(11) . . ?
C226 Si6 C225 107.7(16) . . ?
C125 Si6 C225 17(3) . . ?
C127 Si6 C225 102.8(8) . . ?
N11 Si6 C126 111.7(6) . . ?
C226 Si6 C126 12.0(17) . . ?
C125 Si6 C126 103.1(17) . . ?
C127 Si6 C126 102.8(8) . . ?
C225 Si6 C126 119.5(14) . . ?
N11 Si6 Ca1 38.95(10) . . ?
C226 Si6 Ca1 133.5(13) . . ?
C125 Si6 Ca1 134.0(16) . . ?
C127 Si6 Ca1 71.68(14) . . ?
C225 Si6 Ca1 117.5(13) . . ?
C126 Si6 Ca1 122.4(6) . . ?
N12 Si7 C130 113.91(16) . . ?
N12 Si7 C128 110.05(15) . . ?
C130 Si7 C128 105.38(19) . . ?
N12 Si7 C129 114.58(18) . . ?
C130 Si7 C129 105.9(2) . . ?
C128 Si7 C129 106.4(2) . . ?
N12 Si7 Ca2 37.31(9) . . ?
C130 Si7 Ca2 117.31(13) . . ?
C128 Si7 Ca2 73.72(12) . . ?
C129 Si7 Ca2 135.34(16) . . ?
N12 Si8 C132 114.01(16) . . ?
N12 Si8 C131 114.25(16) . . ?
C132 Si8 C131 105.51(19) . . ?
N12 Si8 C133 110.01(15) . . ?
C132 Si8 C133 106.38(17) . . ?
C131 Si8 C133 106.08(19) . . ?
N12 Si8 Ca2 37.15(8) . . ?
C132 Si8 Ca2 134.15(14) . . ?
C131 Si8 Ca2 118.70(13) . . ?
C133 Si8 Ca2 73.73(11) . . ?
N13 Si9 C136 114.50(15) . . ?
N13 Si9 C134 109.72(14) . . ?
C136 Si9 C134 106.08(17) . . ?
N13 Si9 C137 113.60(15) . . ?
C136 Si9 C137 104.47(17) . . ?
C134 Si9 C137 107.98(16) . . ?
N13 Si9 Ca2 36.61(9) . . ?
C136 Si9 Ca2 119.19(12) . . ?
C134 Si9 Ca2 73.91(10) . . ?
C137 Si9 Ca2 134.24(12) . . ?
N13 Si10 C138 113.72(16) . . ?
N13 Si10 C140 110.11(16) . . ?
C138 Si10 C140 105.8(2) . . ?
N13 Si10 C139 114.02(19) . . ?
C138 Si10 C139 105.0(2) . . ?
C140 Si10 C139 107.7(3) . . ?
N13 Si10 Ca2 37.29(8) . . ?
C138 Si10 Ca2 113.67(14) . . ?
C140 Si10 Ca2 74.88(15) . . ?
C139 Si10 Ca2 139.06(18) . . ?
N14 Si11 C143 114.35(17) . . ?
N14 Si11 C142 109.45(13) . . ?
C143 Si11 C142 105.89(16) . . ?
N14 Si11 C141 114.78(16) . . ?
C143 Si11 C141 105.53(19) . . ?
C142 Si11 C141 106.16(18) . . ?
N14 Si11 Ca2 37.73(8) . . ?
C143 Si11 Ca2 121.98(14) . . ?
C142 Si11 Ca2 72.00(10) . . ?
C141 Si11 Ca2 131.39(13) . . ?
N14 Si12 C144 113.54(16) . . ?
N14 Si12 C145 109.66(14) . . ?
C144 Si12 C145 107.40(16) . . ?
N14 Si12 C146 114.38(17) . . ?
C144 Si12 C146 105.8(2) . . ?
C145 Si12 C146 105.6(2) . . ?
N14 Si12 Ca2 37.89(9) . . ?
C144 Si12 Ca2 130.74(14) . . ?
C145 Si12 Ca2 72.00(11) . . ?
C146 Si12 Ca2 122.14(17) . . ?
C1 N1 C2 111.9(3) . . ?
C1 N1 C4 125.4(2) . . ?
C2 N1 C4 122.5(3) . . ?
C1 N2 C3 112.2(3) . . ?
C1 N2 C16 124.6(2) . . ?
C3 N2 C16 123.1(2) . . ?
C28 N3 C29 112.7(2) . . ?
C28 N3 C31 125.3(3) . . ?
C29 N3 C31 121.9(2) . . ?
C28 N4 C30 112.3(2) . . ?
C28 N4 C43 124.2(2) . . ?
C30 N4 C43 123.5(2) . . ?
C55 N5 C57 112.6(3) . . ?
C55 N5 C58 126.3(3) . . ?
C57 N5 C58 121.2(3) . . ?
C55 N6 C56 112.4(3) . . ?
C55 N6 C70 124.2(3) . . ?
C56 N6 C70 123.4(3) . . ?
C82 N7 C83 112.8(2) . . ?
C82 N7 C85 125.1(2) . . ?
C83 N7 C85 122.0(2) . . ?
C82 N8 C84 112.8(2) . . ?
C82 N8 C97 124.9(2) . . ?
C84 N8 C97 122.1(2) . . ?
Si2 N9 Si1 126.47(18) . . ?
Si2 N9 Ca1 117.55(16) . . ?
Si1 N9 Ca1 115.93(15) . . ?
Si3 N10 Si4 128.3(2) . . ?
Si3 N10 Ca1 115.06(16) . . ?
Si4 N10 Ca1 116.45(17) . . ?
Si6 N11 Si5 127.24(18) . . ?
Si6 N11 Ca1 114.08(15) . . ?
Si5 N11 Ca1 118.64(15) . . ?
Si7 N12 Si8 127.09(15) . . ?
Si7 N12 Ca2 116.35(14) . . ?
Si8 N12 Ca2 116.55(13) . . ?
Si9 N13 Si10 125.79(15) . . ?
Si9 N13 Ca2 117.69(13) . . ?
Si10 N13 Ca2 116.50(13) . . ?
Si11 N14 Si12 128.49(15) . . ?
Si11 N14 Ca2 115.91(12) . . ?
Si12 N14 Ca2 115.58(13) . . ?
N2 C1 N1 102.5(2) . . ?
N2 C1 Li1 126.7(3) . . ?
N1 C1 Li1 130.8(3) . . ?
C3 C2 N1 106.5(3) . . ?
C3 C2 H2 126.7 . . ?
N1 C2 H2 126.7 . . ?
C2 C3 N2 106.9(3) . . ?
C2 C3 H3 126.5 . . ?
N2 C3 H3 126.5 . . ?
C9 C4 C5 123.8(3) . . ?
C9 C4 N1 117.7(3) . . ?
C5 C4 N1 118.4(3) . . ?
C6 C5 C4 116.8(3) . . ?
C6 C5 C10 120.7(3) . . ?
C4 C5 C10 122.5(3) . . ?
C7 C6 C5 121.3(4) . . ?
C7 C6 H6 119.3 . . ?
C5 C6 H6 119.3 . . ?
C6 C7 C8 119.9(3) . . ?
C6 C7 H7 120.1 . . ?
C8 C7 H7 120.1 . . ?
C7 C8 C9 121.6(4) . . ?
C7 C8 H8 119.2 . . ?
C9 C8 H8 119.2 . . ?
C4 C9 C8 116.6(3) . . ?
C4 C9 C13 122.7(3) . . ?
C8 C9 C13 120.7(3) . . ?
C12 C10 C5 112.8(3) . . ?
C12 C10 C11 110.1(3) . . ?
C5 C10 C11 110.2(3) . . ?
C12 C10 H10 107.9 . . ?
C5 C10 H10 107.9 . . ?
C11 C10 H10 107.9 . . ?
C10 C11 H11A 109.5 . . ?
C10 C11 H11B 109.5 . . ?
H11A C11 H11B 109.5 . . ?
C10 C11 H11C 109.5 . . ?
H11A C11 H11C 109.5 . . ?
H11B C11 H11C 109.5 . . ?
C10 C12 H12A 109.5 . . ?
C10 C12 H12B 109.5 . . ?
H12A C12 H12B 109.5 . . ?
C10 C12 H12C 109.5 . . ?
H12A C12 H12C 109.5 . . ?
H12B C12 H12C 109.5 . . ?
C9 C13 C15 111.8(3) . . ?
C9 C13 C14 110.8(3) . . ?
C15 C13 C14 110.7(4) . . ?
C9 C13 H13 107.8 . . ?
C15 C13 H13 107.8 . . ?
C14 C13 H13 107.8 . . ?
C13 C14 H14A 109.5 . . ?
C13 C14 H14B 109.5 . . ?
H14A C14 H14B 109.5 . . ?
C13 C14 H14C 109.5 . . ?
H14A C14 H14C 109.5 . . ?
H14B C14 H14C 109.5 . . ?
C13 C15 H15A 109.5 . . ?
C13 C15 H15B 109.5 . . ?
H15A C15 H15B 109.5 . . ?
C13 C15 H15C 109.5 . . ?
H15A C15 H15C 109.5 . . ?
H15B C15 H15C 109.5 . . ?
C21 C16 C17 123.0(3) . . ?
C21 C16 N2 118.8(3) . . ?
C17 C16 N2 118.0(3) . . ?
C18 C17 C16 116.6(3) . . ?
C18 C17 C22 121.0(3) . . ?
C16 C17 C22 122.4(3) . . ?
C19 C18 C17 121.6(4) . . ?
C19 C18 H18 119.2 . . ?
C17 C18 H18 119.2 . . ?
C18 C19 C20 120.6(3) . . ?
C18 C19 H19 119.7 . . ?
C20 C19 H19 119.7 . . ?
C19 C20 C21 120.9(4) . . ?
C19 C20 H20 119.5 . . ?
C21 C20 H20 119.5 . . ?
C20 C21 C16 117.2(3) . . ?
C20 C21 C25 120.1(3) . . ?
C16 C21 C25 122.7(3) . . ?
C23 C22 C24 108.0(4) . . ?
C23 C22 C17 110.8(3) . . ?
C24 C22 C17 112.0(3) . . ?
C23 C22 H22 108.6 . . ?
C24 C22 H22 108.6 . . ?
C17 C22 H22 108.6 . . ?
C22 C23 H23A 109.5 . . ?
C22 C23 H23B 109.5 . . ?
H23A C23 H23B 109.5 . . ?
C22 C23 H23C 109.5 . . ?
H23A C23 H23C 109.5 . . ?
H23B C23 H23C 109.5 . . ?
C22 C24 H24A 109.5 . . ?
C22 C24 H24B 109.5 . . ?
H24A C24 H24B 109.5 . . ?
C22 C24 H24C 109.5 . . ?
H24A C24 H24C 109.5 . . ?
H24B C24 H24C 109.5 . . ?
C26 C25 C21 112.5(4) . . ?
C26 C25 C27 110.7(5) . . ?
C21 C25 C27 109.7(4) . . ?
C26 C25 H25 107.9 . . ?
C21 C25 H25 107.9 . . ?
C27 C25 H25 107.9 . . ?
C25 C26 H26A 109.5 . . ?
C25 C26 H26B 109.5 . . ?
H26A C26 H26B 109.5 . . ?
C25 C26 H26C 109.5 . . ?
H26A C26 H26C 109.5 . . ?
H26B C26 H26C 109.5 . . ?
C25 C27 H27A 109.5 . . ?
C25 C27 H27B 109.5 . . ?
H27A C27 H27B 109.5 . . ?
C25 C27 H27C 109.5 . . ?
H27A C27 H27C 109.5 . . ?
H27B C27 H27C 109.5 . . ?
N3 C28 N4 102.1(2) . . ?
N3 C28 Li1 129.9(3) . . ?
N4 C28 Li1 127.9(3) . . ?
C30 C29 N3 106.1(3) . . ?
C30 C29 H29 126.9 . . ?
N3 C29 H29 126.9 . . ?
C29 C30 N4 106.8(3) . . ?
C29 C30 H30 126.6 . . ?
N4 C30 H30 126.6 . . ?
C32 C31 C36 123.5(3) . . ?
C32 C31 N3 117.8(3) . . ?
C36 C31 N3 118.6(3) . . ?
C31 C32 C33 117.2(3) . . ?
C31 C32 C37 122.7(3) . . ?
C33 C32 C37 120.0(3) . . ?
C34 C33 C32 120.7(4) . . ?
C34 C33 H33 119.7 . . ?
C32 C33 H33 119.7 . . ?
C33 C34 C35 121.2(3) . . ?
C33 C34 H34 119.4 . . ?
C35 C34 H34 119.4 . . ?
C34 C35 C36 120.6(4) . . ?
C34 C35 H35 119.7 . . ?
C36 C35 H35 119.7 . . ?
C35 C36 C31 116.8(3) . . ?
C35 C36 C40 120.5(3) . . ?
C31 C36 C40 122.7(3) . . ?
C38 C37 C32 112.1(4) . . ?
C38 C37 C39 110.7(5) . . ?
C32 C37 C39 111.6(4) . . ?
C38 C37 H37 107.4 . . ?
C32 C37 H37 107.4 . . ?
C39 C37 H37 107.4 . . ?
C37 C38 H38A 109.5 . . ?
C37 C38 H38B 109.5 . . ?
H38A C38 H38B 109.5 . . ?
C37 C38 H38C 109.5 . . ?
H38A C38 H38C 109.5 . . ?
H38B C38 H38C 109.5 . . ?
C37 C39 H39A 109.5 . . ?
C37 C39 H39B 109.5 . . ?
H39A C39 H39B 109.5 . . ?
C37 C39 H39C 109.5 . . ?
H39A C39 H39C 109.5 . . ?
H39B C39 H39C 109.5 . . ?
C36 C40 C41 110.7(3) . . ?
C36 C40 C42 112.7(3) . . ?
C41 C40 C42 109.1(4) . . ?
C36 C40 H40 108.1 . . ?
C41 C40 H40 108.1 . . ?
C42 C40 H40 108.1 . . ?
C40 C41 H41A 109.5 . . ?
C40 C41 H41B 109.5 . . ?
H41A C41 H41B 109.5 . . ?
C40 C41 H41C 109.5 . . ?
H41A C41 H41C 109.5 . . ?
H41B C41 H41C 109.5 . . ?
C40 C42 H42A 109.5 . . ?
C40 C42 H42B 109.5 . . ?
H42A C42 H42B 109.5 . . ?
C40 C42 H42C 109.5 . . ?
H42A C42 H42C 109.5 . . ?
H42B C42 H42C 109.5 . . ?
C48 C43 C44 123.1(3) . . ?
C48 C43 N4 117.8(3) . . ?
C44 C43 N4 119.0(3) . . ?
C45 C44 C43 117.2(3) . . ?
C45 C44 C49 120.9(3) . . ?
C43 C44 C49 122.0(3) . . ?
C46 C45 C44 120.9(3) . . ?
C46 C45 H45 119.6 . . ?
C44 C45 H45 119.6 . . ?
C47 C46 C45 120.7(3) . . ?
C47 C46 H46 119.6 . . ?
C45 C46 H46 119.6 . . ?
C46 C47 C48 121.2(3) . . ?
C46 C47 H47 119.4 . . ?
C48 C47 H47 119.4 . . ?
C43 C48 C47 116.8(3) . . ?
C43 C48 C52 121.8(3) . . ?
C47 C48 C52 121.4(3) . . ?
C51 C49 C44 110.5(5) . . ?
C51 C49 C50 111.3(5) . . ?
C44 C49 C50 111.3(4) . . ?
C51 C49 H49 107.9 . . ?
C44 C49 H49 107.9 . . ?
C50 C49 H49 107.9 . . ?
C49 C50 H50A 109.5 . . ?
C49 C50 H50B 109.5 . . ?
H50A C50 H50B 109.5 . . ?
C49 C50 H50C 109.5 . . ?
H50A C50 H50C 109.5 . . ?
H50B C50 H50C 109.5 . . ?
C49 C51 H51A 109.5 . . ?
C49 C51 H51B 109.5 . . ?
H51A C51 H51B 109.5 . . ?
C49 C51 H51C 109.5 . . ?
H51A C51 H51C 109.5 . . ?
H51B C51 H51C 109.5 . . ?
C48 C52 C53 113.0(3) . . ?
C48 C52 C54 111.2(3) . . ?
C53 C52 C54 110.7(3) . . ?
C48 C52 H52 107.2 . . ?
C53 C52 H52 107.2 . . ?
C54 C52 H52 107.2 . . ?
C52 C53 H53A 109.5 . . ?
C52 C53 H53B 109.5 . . ?
H53A C53 H53B 109.5 . . ?
C52 C53 H53C 109.5 . . ?
H53A C53 H53C 109.5 . . ?
H53B C53 H53C 109.5 . . ?
C52 C54 H54A 109.5 . . ?
C52 C54 H54B 109.5 . . ?
H54A C54 H54B 109.5 . . ?
C52 C54 H54C 109.5 . . ?
H54A C54 H54C 109.5 . . ?
H54B C54 H54C 109.5 . . ?
N6 C55 N5 102.2(3) . . ?
N6 C55 Li2 122.3(3) . . ?
N5 C55 Li2 135.2(3) . . ?
C57 C56 N6 107.2(3) . . ?
C57 C56 H56 126.4 . . ?
N6 C56 H56 126.4 . . ?
C56 C57 N5 105.7(3) . . ?
C56 C57 H57 127.2 . . ?
N5 C57 H57 127.2 . . ?
C59 C58 C63 123.5(3) . . ?
C59 C58 N5 117.9(3) . . ?
C63 C58 N5 118.4(3) . . ?
C60 C59 C58 116.3(4) . . ?
C60 C59 C64 122.8(3) . . ?
C58 C59 C64 120.9(3) . . ?
C61 C60 C59 121.6(4) . . ?
C61 C60 H60 119.2 . . ?
C59 C60 H60 119.2 . . ?
C62 C61 C60 120.2(4) . . ?
C62 C61 H61 119.9 . . ?
C60 C61 H61 119.9 . . ?
C61 C62 C63 121.7(4) . . ?
C61 C62 H62 119.1 . . ?
C63 C62 H62 119.1 . . ?
C62 C63 C58 116.6(3) . . ?
C62 C63 C67 122.0(3) . . ?
C58 C63 C67 121.4(3) . . ?
C66 C64 C59 110.5(3) . . ?
C66 C64 C65 110.7(4) . . ?
C59 C64 C65 111.6(4) . . ?
C66 C64 H64 108.0 . . ?
C59 C64 H64 108.0 . . ?
C65 C64 H64 108.0 . . ?
C64 C65 H65A 109.5 . . ?
C64 C65 H65B 109.5 . . ?
H65A C65 H65B 109.5 . . ?
C64 C65 H65C 109.5 . . ?
H65A C65 H65C 109.5 . . ?
H65B C65 H65C 109.5 . . ?
C64 C66 H66A 109.5 . . ?
C64 C66 H66B 109.5 . . ?
H66A C66 H66B 109.5 . . ?
C64 C66 H66C 109.5 . . ?
H66A C66 H66C 109.5 . . ?
H66B C66 H66C 109.5 . . ?
C68 C67 C69 109.5(3) . . ?
C68 C67 C63 110.7(4) . . ?
C69 C67 C63 113.3(3) . . ?
C68 C67 H67 107.7 . . ?
C69 C67 H67 107.7 . . ?
C63 C67 H67 107.7 . . ?
C67 C68 H68A 109.5 . . ?
C67 C68 H68B 109.5 . . ?
H68A C68 H68B 109.5 . . ?
C67 C68 H68C 109.5 . . ?
H68A C68 H68C 109.5 . . ?
H68B C68 H68C 109.5 . . ?
C67 C69 H69A 109.5 . . ?
C67 C69 H69B 109.5 . . ?
H69A C69 H69B 109.5 . . ?
C67 C69 H69C 109.5 . . ?
H69A C69 H69C 109.5 . . ?
H69B C69 H69C 109.5 . . ?
C75 C70 C71 124.0(3) . . ?
C75 C70 N6 118.1(3) . . ?
C71 C70 N6 117.9(3) . . ?
C72 C71 C70 116.5(4) . . ?
C72 C71 C76 121.6(4) . . ?
C70 C71 C76 121.9(3) . . ?
C73 C72 C71 120.7(4) . . ?
C73 C72 H72 119.6 . . ?
C71 C72 H72 119.6 . . ?
C72 C73 C74 121.8(4) . . ?
C72 C73 H73 119.1 . . ?
C74 C73 H73 119.1 . . ?
C73 C74 C75 120.6(4) . . ?
C73 C74 H74 119.7 . . ?
C75 C74 H74 119.7 . . ?
C74 C75 C70 116.3(4) . . ?
C74 C75 C79 120.8(3) . . ?
C70 C75 C79 122.9(3) . . ?
C77 C76 C71 114.7(4) . . ?
C77 C76 C78 107.7(4) . . ?
C71 C76 C78 112.1(3) . . ?
C77 C76 H76 107.3 . . ?
C71 C76 H76 107.3 . . ?
C78 C76 H76 107.3 . . ?
C76 C77 H77A 109.5 . . ?
C76 C77 H77B 109.5 . . ?
H77A C77 H77B 109.5 . . ?
C76 C77 H77C 109.5 . . ?
H77A C77 H77C 109.5 . . ?
H77B C77 H77C 109.5 . . ?
C76 C78 H78A 109.5 . . ?
C76 C78 H78B 109.5 . . ?
H78A C78 H78B 109.5 . . ?
C76 C78 H78C 109.5 . . ?
H78A C78 H78C 109.5 . . ?
H78B C78 H78C 109.5 . . ?
C75 C79 C81 111.5(4) . . ?
C75 C79 C80 110.5(4) . . ?
C81 C79 C80 111.1(4) . . ?
C75 C79 H79 107.9 . . ?
C81 C79 H79 107.9 . . ?
C80 C79 H79 107.9 . . ?
C79 C80 H80A 109.5 . . ?
C79 C80 H80B 109.5 . . ?
H80A C80 H80B 109.5 . . ?
C79 C80 H80C 109.5 . . ?
H80A C80 H80C 109.5 . . ?
H80B C80 H80C 109.5 . . ?
C79 C81 H81A 109.5 . . ?
C79 C81 H81B 109.5 . . ?
H81A C81 H81B 109.5 . . ?
C79 C81 H81C 109.5 . . ?
H81A C81 H81C 109.5 . . ?
H81B C81 H81C 109.5 . . ?
N8 C82 N7 101.7(2) . . ?
N8 C82 Li2 131.4(3) . . ?
N7 C82 Li2 126.1(3) . . ?
C84 C83 N7 105.9(3) . . ?
C84 C83 H83 127.0 . . ?
N7 C83 H83 127.0 . . ?
C83 C84 N8 106.8(3) . . ?
C83 C84 H84 126.6 . . ?
N8 C84 H84 126.6 . . ?
C86 C85 C90 124.2(3) . . ?
C86 C85 N7 117.9(3) . . ?
C90 C85 N7 117.8(3) . . ?
C85 C86 C87 116.4(3) . . ?
C85 C86 C91 122.5(3) . . ?
C87 C86 C91 121.1(3) . . ?
C88 C87 C86 120.8(3) . . ?
C88 C87 H87 119.6 . . ?
C86 C87 H87 119.6 . . ?
C89 C88 C87 121.3(3) . . ?
C89 C88 H88 119.4 . . ?
C87 C88 H88 119.4 . . ?
C88 C89 C90 120.4(3) . . ?
C88 C89 H89 119.8 . . ?
C90 C89 H89 119.8 . . ?
C85 C90 C89 116.9(3) . . ?
C85 C90 C94 121.8(3) . . ?
C89 C90 C94 121.3(3) . . ?
C93 C91 C86 111.3(3) . . ?
C93 C91 C92 110.4(4) . . ?
C86 C91 C92 112.1(3) . . ?
C93 C91 H91 107.6 . . ?
C86 C91 H91 107.6 . . ?
C92 C91 H91 107.6 . . ?
C91 C92 H92A 109.5 . . ?
C91 C92 H92B 109.5 . . ?
H92A C92 H92B 109.5 . . ?
C91 C92 H92C 109.5 . . ?
H92A C92 H92C 109.5 . . ?
H92B C92 H92C 109.5 . . ?
C91 C93 H93A 109.5 . . ?
C91 C93 H93B 109.5 . . ?
H93A C93 H93B 109.5 . . ?
C91 C93 H93C 109.5 . . ?
H93A C93 H93C 109.5 . . ?
H93B C93 H93C 109.5 . . ?
C90 C94 C96 111.3(3) . . ?
C90 C94 C95 112.3(3) . . ?
C96 C94 C95 110.4(3) . . ?
C90 C94 H94 107.5 . . ?
C96 C94 H94 107.5 . . ?
C95 C94 H94 107.5 . . ?
C94 C95 H95A 109.5 . . ?
C94 C95 H95B 109.5 . . ?
H95A C95 H95B 109.5 . . ?
C94 C95 H95C 109.5 . . ?
H95A C95 H95C 109.5 . . ?
H95B C95 H95C 109.5 . . ?
C94 C96 H96A 109.5 . . ?
C94 C96 H96B 109.5 . . ?
H96A C96 H96B 109.5 . . ?
C94 C96 H96C 109.5 . . ?
H96A C96 H96C 109.5 . . ?
H96B C96 H96C 109.5 . . ?
C98 C97 C102 123.0(3) . . ?
C98 C97 N8 119.3(3) . . ?
C102 C97 N8 117.6(3) . . ?
C99 C98 C97 117.5(3) . . ?
C99 C98 C103 120.6(3) . . ?
C97 C98 C103 121.9(3) . . ?
C98 C99 C100 120.8(3) . . ?
C98 C99 H99 119.6 . . ?
C100 C99 H99 119.6 . . ?
C101 C100 C99 120.2(3) . . ?
C101 C100 H100 119.9 . . ?
C99 C100 H100 119.9 . . ?
C100 C101 C102 121.5(3) . . ?
C100 C101 H101 119.3 . . ?
C102 C101 H101 119.3 . . ?
C101 C102 C97 116.9(3) . . ?
C101 C102 C106 119.7(3) . . ?
C97 C102 C106 123.3(3) . . ?
C104 C103 C98 112.6(3) . . ?
C104 C103 C105 109.3(3) . . ?
C98 C103 C105 111.3(3) . . ?
C104 C103 H103 107.8 . . ?
C98 C103 H103 107.8 . . ?
C105 C103 H103 107.8 . . ?
C103 C104 H10A 109.5 . . ?
C103 C104 H10B 109.5 . . ?
H10A C104 H10B 109.5 . . ?
C103 C104 H10C 109.5 . . ?
H10A C104 H10C 109.5 . . ?
H10B C104 H10C 109.5 . . ?
C103 C105 H10D 109.5 . . ?
C103 C105 H10E 109.5 . . ?
H10D C105 H10E 109.5 . . ?
C103 C105 H10F 109.5 . . ?
H10D C105 H10F 109.5 . . ?
H10E C105 H10F 109.5 . . ?
C107 C106 C102 111.3(3) . . ?
C107 C106 C108 111.9(4) . . ?
C102 C106 C108 110.1(3) . . ?
C107 C106 H106 107.7 . . ?
C102 C106 H106 107.7 . . ?
C108 C106 H106 107.7 . . ?
C106 C107 H10G 109.5 . . ?
C106 C107 H10H 109.5 . . ?
H10G C107 H10H 109.5 . . ?
C106 C107 H10I 109.5 . . ?
H10G C107 H10I 109.5 . . ?
H10H C107 H10I 109.5 . . ?
C106 C108 H10J 109.5 . . ?
C106 C108 H10K 109.5 . . ?
H10J C108 H10K 109.5 . . ?
C106 C108 H10L 109.5 . . ?
H10J C108 H10L 109.5 . . ?
H10K C108 H10L 109.5 . . ?
Si1 C109 H10M 109.5 . . ?
Si1 C109 H10N 109.5 . . ?
H10M C109 H10N 109.5 . . ?
Si1 C109 H10O 109.5 . . ?
H10M C109 H10O 109.5 . . ?
H10N C109 H10O 109.5 . . ?
Si1 C110 H11D 109.5 . . ?
Si1 C110 H11E 109.5 . . ?
H11D C110 H11E 109.5 . . ?
Si1 C110 H11F 109.5 . . ?
H11D C110 H11F 109.5 . . ?
H11E C110 H11F 109.5 . . ?
Si1 C111 H11G 109.5 . . ?
Si1 C111 H11H 109.5 . . ?
H11G C111 H11H 109.5 . . ?
Si1 C111 H11I 109.5 . . ?
H11G C111 H11I 109.5 . . ?
H11H C111 H11I 109.5 . . ?
Si2 C112 H11J 109.5 . . ?
Si2 C112 H11K 109.5 . . ?
H11J C112 H11K 109.5 . . ?
Si2 C112 H11L 109.5 . . ?
H11J C112 H11L 109.5 . . ?
H11K C112 H11L 109.5 . . ?
Si2 C113 H11M 109.5 . . ?
Si2 C113 H11N 109.5 . . ?
H11M C113 H11N 109.5 . . ?
Si2 C113 H11O 109.5 . . ?
H11M C113 H11O 109.5 . . ?
H11N C113 H11O 109.5 . . ?
Si2 C114 H11P 109.5 . . ?
Si2 C114 H11Q 109.5 . . ?
H11P C114 H11Q 109.5 . . ?
Si2 C114 H11R 109.5 . . ?
H11P C114 H11R 109.5 . . ?
H11Q C114 H11R 109.5 . . ?
Si3 C115 H11S 109.5 . . ?
Si3 C115 H11T 109.5 . . ?
H11S C115 H11T 109.5 . . ?
Si3 C115 H11U 109.5 . . ?
H11S C115 H11U 109.5 . . ?
H11T C115 H11U 109.5 . . ?
Si3 C116 H11V 109.5 . . ?
Si3 C116 H11W 109.5 . . ?
Si3 C116 H11X 109.5 . . ?
Si3 C117 H11Y 109.5 . . ?
Si3 C117 H11Z 109.5 . . ?
Si3 C117 H011 109.5 . . ?
Si3 C216 H21A 109.5 . . ?
Si3 C216 H21B 109.5 . . ?
H21A C216 H21B 109.5 . . ?
Si3 C216 H21C 109.5 . . ?
H21A C216 H21C 109.5 . . ?
H21B C216 H21C 109.5 . . ?
Si3 C217 H21D 109.5 . . ?
Si3 C217 H21E 109.5 . . ?
H21D C217 H21E 109.5 . . ?
Si3 C217 H21F 109.5 . . ?
H21D C217 H21F 109.5 . . ?
H21E C217 H21F 109.5 . . ?
Si4 C118 H01B 109.5 . . ?
Si4 C118 H01C 109.5 . . ?
H01B C118 H01C 109.5 . . ?
Si4 C118 H01D 109.5 . . ?
H01B C118 H01D 109.5 . . ?
H01C C118 H01D 109.5 . . ?
Si4 C119 H01E 109.5 . . ?
Si4 C119 H01F 109.5 . . ?
H01E C119 H01F 109.5 . . ?
Si4 C119 H01G 109.5 . . ?
H01E C119 H01G 109.5 . . ?
H01F C119 H01G 109.5 . . ?
Si4 C120 H12D 109.5 . . ?
Si4 C120 H12E 109.5 . . ?
H12D C120 H12E 109.5 . . ?
Si4 C120 H12F 109.5 . . ?
H12D C120 H12F 109.5 . . ?
H12E C120 H12F 109.5 . . ?
Si5 C121 H12G 109.5 . . ?
Si5 C121 H12H 109.5 . . ?
H12G C121 H12H 109.5 . . ?
Si5 C121 H12I 109.5 . . ?
H12G C121 H12I 109.5 . . ?
H12H C121 H12I 109.5 . . ?
Si5 C123 H12J 109.5 . . ?
Si5 C123 H12K 109.5 . . ?
H12J C123 H12K 109.5 . . ?
Si5 C123 H12L 109.5 . . ?
H12J C123 H12L 109.5 . . ?
H12K C123 H12L 109.5 . . ?
Si5 C124 H12M 109.5 . . ?
Si5 C124 H12N 109.5 . . ?
H12M C124 H12N 109.5 . . ?
Si5 C124 H12O 109.5 . . ?
H12M C124 H12O 109.5 . . ?
H12N C124 H12O 109.5 . . ?
Si6 C125 H12P 109.5 . . ?
Si6 C125 H12Q 109.5 . . ?
Si6 C125 H12R 109.5 . . ?
Si6 C126 H12S 109.5 . . ?
Si6 C126 H12T 109.5 . . ?
Si6 C126 H12U 109.5 . . ?
Si6 C225 H22A 109.5 . . ?
Si6 C225 H22B 109.5 . . ?
H22A C225 H22B 109.5 . . ?
Si6 C225 H22C 109.5 . . ?
H22A C225 H22C 109.5 . . ?
H22B C225 H22C 109.5 . . ?
Si6 C226 H22D 109.5 . . ?
Si6 C226 H22E 109.5 . . ?
H22D C226 H22E 109.5 . . ?
Si6 C226 H22F 109.5 . . ?
H22D C226 H22F 109.5 . . ?
H22E C226 H22F 109.5 . . ?
Si6 C127 H12V 109.5 . . ?
Si6 C127 H12W 109.5 . . ?
H12V C127 H12W 109.5 . . ?
Si6 C127 H12X 109.5 . . ?
H12V C127 H12X 109.5 . . ?
H12W C127 H12X 109.5 . . ?
Si7 C128 H12Y 109.5 . . ?
Si7 C128 H12Z 109.5 . . ?
H12Y C128 H12Z 109.5 . . ?
Si7 C128 H012 109.5 . . ?
H12Y C128 H012 109.5 . . ?
H12Z C128 H012 109.5 . . ?
Si7 C129 H21G 109.5 . . ?
Si7 C129 H21H 109.5 . . ?
H21G C129 H21H 109.5 . . ?
Si7 C129 H21I 109.5 . . ?
H21G C129 H21I 109.5 . . ?
H21H C129 H21I 109.5 . . ?
Si7 C130 H13A 109.5 . . ?
Si7 C130 H13B 109.5 . . ?
H13A C130 H13B 109.5 . . ?
Si7 C130 H13C 109.5 . . ?
H13A C130 H13C 109.5 . . ?
H13B C130 H13C 109.5 . . ?
Si8 C131 H13D 109.5 . . ?
Si8 C131 H13E 109.5 . . ?
H13D C131 H13E 109.5 . . ?
Si8 C131 H13F 109.5 . . ?
H13D C131 H13F 109.5 . . ?
H13E C131 H13F 109.5 . . ?
Si8 C132 H13G 109.5 . . ?
Si8 C132 H13H 109.5 . . ?
H13G C132 H13H 109.5 . . ?
Si8 C132 H13I 109.5 . . ?
H13G C132 H13I 109.5 . . ?
H13H C132 H13I 109.5 . . ?
Si8 C133 H13J 109.5 . . ?
Si8 C133 H13K 109.5 . . ?
H13J C133 H13K 109.5 . . ?
Si8 C133 H13L 109.5 . . ?
H13J C133 H13L 109.5 . . ?
H13K C133 H13L 109.5 . . ?
Si9 C134 H13M 109.5 . . ?
Si9 C134 H13N 109.5 . . ?
H13M C134 H13N 109.5 . . ?
Si9 C134 H13O 109.5 . . ?
H13M C134 H13O 109.5 . . ?
H13N C134 H13O 109.5 . . ?
Si9 C136 H13P 109.5 . . ?
Si9 C136 H13Q 109.5 . . ?
H13P C136 H13Q 109.5 . . ?
Si9 C136 H13R 109.5 . . ?
H13P C136 H13R 109.5 . . ?
H13Q C136 H13R 109.5 . . ?
Si9 C137 H13S 109.5 . . ?
Si9 C137 H13T 109.5 . . ?
H13S C137 H13T 109.5 . . ?
Si9 C137 H13U 109.5 . . ?
H13S C137 H13U 109.5 . . ?
H13T C137 H13U 109.5 . . ?
Si10 C138 H13V 109.5 . . ?
Si10 C138 H13W 109.5 . . ?
H13V C138 H13W 109.5 . . ?
Si10 C138 H13X 109.5 . . ?
H13V C138 H13X 109.5 . . ?
H13W C138 H13X 109.5 . . ?
Si10 C139 H13Y 109.5 . . ?
Si10 C139 H13Z 109.5 . . ?
H13Y C139 H13Z 109.5 . . ?
Si10 C139 H013 109.5 . . ?
H13Y C139 H013 109.5 . . ?
H13Z C139 H013 109.5 . . ?
Si10 C140 H14D 109.5 . . ?
Si10 C140 H14E 109.5 . . ?
H14D C140 H14E 109.5 . . ?
Si10 C140 H14F 109.5 . . ?
H14D C140 H14F 109.5 . . ?
H14E C140 H14F 109.5 . . ?
Si11 C141 H14G 109.5 . . ?
Si11 C141 H14H 109.5 . . ?
H14G C141 H14H 109.5 . . ?
Si11 C141 H14I 109.5 . . ?
H14G C141 H14I 109.5 . . ?
H14H C141 H14I 109.5 . . ?
Si11 C142 H14J 109.5 . . ?
Si11 C142 H14K 109.5 . . ?
H14J C142 H14K 109.5 . . ?
Si11 C142 H14L 109.5 . . ?
H14J C142 H14L 109.5 . . ?
H14K C142 H14L 109.5 . . ?
Si11 C143 H14M 109.5 . . ?
Si11 C143 H14N 109.5 . . ?
H14M C143 H14N 109.5 . . ?
Si11 C143 H14O 109.5 . . ?
H14M C143 H14O 109.5 . . ?
H14N C143 H14O 109.5 . . ?
Si12 C144 H14P 109.5 . . ?
Si12 C144 H14Q 109.5 . . ?
H14P C144 H14Q 109.5 . . ?
Si12 C144 H14R 109.5 . . ?
H14P C144 H14R 109.5 . . ?
H14Q C144 H14R 109.5 . . ?
Si12 C145 H14S 109.5 . . ?
Si12 C145 H14T 109.5 . . ?
H14S C145 H14T 109.5 . . ?
Si12 C145 H14U 109.5 . . ?
H14S C145 H14U 109.5 . . ?
H14T C145 H14U 109.5 . . ?
Si12 C146 H14V 109.5 . . ?
Si12 C146 H14W 109.5 . . ?
H14V C146 H14W 109.5 . . ?
Si12 C146 H14X 109.5 . . ?
H14V C146 H14X 109.5 . . ?
H14W C146 H14X 109.5 . . ?
C149 C148 C153 120.0 . . ?
C149 C148 C147 112.4(15) . . ?
C153 C148 C147 127.5(15) . . ?
C148 C149 C150 120.0 . . ?
C148 C149 H149 120.0 . . ?
C150 C149 H149 120.0 . . ?
C151 C150 C149 120.0 . . ?
C151 C150 H150 120.0 . . ?
C149 C150 H150 120.0 . . ?
C152 C151 C150 120.0 . . ?
C152 C151 H151 120.0 . . ?
C150 C151 H151 120.0 . . ?
C151 C152 C153 120.0 . . ?
C151 C152 H152 120.0 . . ?
C153 C152 H152 120.0 . . ?
C152 C153 C148 120.0 . . ?
C152 C153 H153 120.0 . . ?
C148 C153 H153 120.0 . . ?
C248 C247 H24D 109.5 . . ?
C248 C247 H24E 109.5 . . ?
H24D C247 H24E 109.5 . . ?
C248 C247 H24F 109.5 . . ?
H24D C247 H24F 109.5 . . ?
H24E C247 H24F 109.5 . . ?
C247 C248 C249 126.9(14) . . ?
C247 C248 C253 113.1(14) . . ?
C249 C248 C253 120.0 . . ?
C250 C249 C248 120.0 . . ?
C250 C249 H249 120.0 . . ?
C248 C249 H249 120.0 . . ?
C249 C250 C251 120.0 . . ?
C249 C250 H250 120.0 . . ?
C251 C250 H250 120.0 . . ?
C252 C251 C250 120.0 . . ?
C252 C251 H251 120.0 . . ?
C250 C251 H251 120.0 . . ?
C251 C252 C253 120.0 . . ?
C251 C252 H252 120.0 . . ?
C253 C252 H252 120.0 . . ?
C252 C253 C248 120.0 . . ?
C252 C253 H253 120.0 . . ?
C248 C253 H253 120.0 . . ?
C155 C154 H15D 109.5 . . ?
C155 C154 H15E 109.5 . . ?
H15D C154 H15E 109.5 . . ?
C155 C154 H15F 109.5 . . ?
H15D C154 H15F 109.5 . . ?
H15E C154 H15F 109.5 . . ?
C156 C155 C154 107.8(15) . . ?
C156 C155 H15G 110.2 . . ?
C154 C155 H15G 110.2 . . ?
C156 C155 H15H 110.2 . . ?
C154 C155 H15H 110.2 . . ?
H15G C155 H15H 108.5 . . ?
C155 C156 C156 116.1(15) . 2_676 ?
C155 C156 H15I 108.3 . . ?
C156 C156 H15I 108.3 2_676 . ?
C155 C156 H15J 108.3 . . ?
C156 C156 H15J 108.3 2_676 . ?
H15I C156 H15J 107.4 . . ?
C255 C254 C257 124(3) . . ?
C255 C254 C256 88(3) . 2_676 ?
C257 C254 C256 141(4) . 2_676 ?
C256 C255 C254 148(5) . . ?
C256 C255 C256 101(3) . 2_676 ?
C254 C255 C256 48(3) . 2_676 ?
C256 C255 H255 106.1 . . ?
C254 C255 H255 106.1 . . ?
C256 C255 H255 151.6 2_676 . ?
C255 C256 C254 123(3) . 2_676 ?
C255 C256 C255 79(3) . 2_676 ?
C254 C256 C255 44.0(12) 2_676 2_676 ?
C255 C256 H256 118.5 . . ?
C254 C256 H256 118.5 2_676 . ?
C255 C256 H256 161.2 2_676 . ?
C254 C257 H25A 109.5 . . ?
C254 C257 H25B 109.5 . . ?
H25A C257 H25B 109.5 . . ?
C254 C257 H25C 109.5 . . ?
H25A C257 H25C 109.5 . . ?
H25B C257 H25C 109.5 . . ?
 
_diffrn_measured_fraction_theta_max    0.969
_diffrn_reflns_theta_full              27.35
_diffrn_measured_fraction_theta_full   0.969
_refine_diff_density_max    1.806
_refine_diff_density_min   -1.174
_refine_diff_density_rms    0.057

#=====>END

#======================================================
 
data_compound5
 
_audit_creation_method            SHELXL-97
_chemical_name_systematic
;
 ?
;
_chemical_name_common             ?
_chemical_melting_point           ?
_chemical_formula_moiety          
'C54 H72 N4 Na, C18 H54 Ca N3 Si6'
_chemical_formula_sum
 'C72 H126 Ca N7 Na Si6'
_chemical_formula_weight          1321.41
 
loop_
 _atom_type_symbol
 _atom_type_description
 _atom_type_scat_dispersion_real
 _atom_type_scat_dispersion_imag
 _atom_type_scat_source
 'C'  'C'   0.0033   0.0016
 'International Tables Vol C Tables 4.2.6.8 and 6.1.1.4'
 'H'  'H'   0.0000   0.0000
 'International Tables Vol C Tables 4.2.6.8 and 6.1.1.4'
 'N'  'N'   0.0061   0.0033
 'International Tables Vol C Tables 4.2.6.8 and 6.1.1.4'
 'Si'  'Si'   0.0817   0.0704
 'International Tables Vol C Tables 4.2.6.8 and 6.1.1.4'
 'Na'  'Na'   0.0362   0.0249
 'International Tables Vol C Tables 4.2.6.8 and 6.1.1.4'
 'Ca'  'Ca'   0.2262   0.3064
 'International Tables Vol C Tables 4.2.6.8 and 6.1.1.4'
 
_symmetry_cell_setting            monoclinic
_symmetry_space_group_name_H-M    'P 1 21/n 1'
 
loop_
 _symmetry_equiv_pos_as_xyz
 'x, y, z'
 '-x+1/2, y+1/2, -z+1/2'
 '-x, -y, -z'
 'x-1/2, -y-1/2, z-1/2'
 
_cell_length_a                    20.84100(10)
_cell_length_b                    21.05920(10)
_cell_length_c                    21.02590(10)
_cell_angle_alpha                 90.00
_cell_angle_beta                  112.9070(4)
_cell_angle_gamma                 90.00
_cell_volume                      8500.40(7)
_cell_formula_units_Z             4
_cell_measurement_temperature     150(2)
_cell_measurement_reflns_used     299098
_cell_measurement_theta_min        2.910
_cell_measurement_theta_max        27.485
 
_exptl_crystal_description        block
_exptl_crystal_colour             colourless
_exptl_crystal_size_max           0.50
_exptl_crystal_size_mid           0.40
_exptl_crystal_size_min           0.40
_exptl_crystal_density_meas       ?
_exptl_crystal_density_diffrn     1.033
_exptl_crystal_density_method     'not measured'
_exptl_crystal_F_000              2888
_exptl_absorpt_coefficient_mu     0.203
_exptl_absorpt_correction_type    none
_exptl_absorpt_correction_T_min   ?
_exptl_absorpt_correction_T_max   ?
_exptl_absorpt_process_details    ?
 
_exptl_special_details
;
 ?
;
 
_diffrn_ambient_temperature       150(2)
_diffrn_radiation_wavelength      0.71073
_diffrn_radiation_type            MoK\a
_diffrn_radiation_source          'fine-focus sealed tube'
_diffrn_radiation_monochromator   graphite
_diffrn_measurement_device_type   'Nonius Kappa CCD'
_diffrn_measurement_method        '552 1.0 degree images with \f and \w scans'
_diffrn_standards_number          0
_diffrn_standards_decay_%         0
_diffrn_reflns_number             147116
_diffrn_reflns_av_R_equivalents   0.0646
_diffrn_reflns_av_sigmaI/netI     0.0305
_diffrn_reflns_limit_h_min        -27
_diffrn_reflns_limit_h_max        27
_diffrn_reflns_limit_k_min        -27
_diffrn_reflns_limit_k_max        27
_diffrn_reflns_limit_l_min        -27
_diffrn_reflns_limit_l_max        27
_diffrn_reflns_theta_min          4.89
_diffrn_reflns_theta_max          27.53
_reflns_number_total              19331
_reflns_number_gt                 15222
_reflns_threshold_expression      >2sigma(I)
 
_computing_data_collection        'Collect (Nonius BV, 1997-2000)'
_computing_cell_refinement         'HKL Scalepack (Otwinski & Minor, 1997)'
_computing_data_reduction         
;
 DENZO-SCALEPACK Z. Otwinowski and W. Minor, " 
 Processing of X-ray Diffraction Data Collected in Oscillation Mode ", 
 Methods in Enzymology, Volume 276: Macromolecular Crystallography, 
 part A, p.307-326, 1997,C.W. Carter, Jr. & R. M. Sweet, Eds., Academic Press.
;
_computing_structure_solution     
; 
 SIR97- Altomare A., Burla M.C., Camalli M., Cascarano G.L., Giacovazzo C. , 
 Guagliardi A., Moliterni A.G.G., Polidori G.,Spagna R. 
 (1999) J. Appl. Cryst. 32, 115-119
;
_computing_structure_refinement   
;
 SHELXL97 -Program for Crystal Structure Analysis (Release 97-2). 
 Sheldrick, G.M., Instit\"ut f\"ur Anorganische Chemie der Universit\"at, 
 Tammanstrasse 4, D-3400 G\"ottingen, Germany, 1998 
;
_computing_molecular_graphics  

'ORTEP3 for Windows - Farrugia, L. J. J. Appl. Crystallogr. 1997, 30, 565'

_computing_publication_material    
;
 'WinGX publication routines, Farrugia, 
 L. J., J. Appl. Crystallogr., 1999, 32, 837-838
;  
 
_refine_special_details
;
 Refinement of F^2^ against ALL reflections.  The weighted R-factor wR and
 goodness of fit S are based on F^2^, conventional R-factors R are based
 on F, with F set to zero for negative F^2^. The threshold expression of
 F^2^ > 2sigma(F^2^) is used only for calculating R-factors(gt) etc. and is
 not relevant to the choice of reflections for refinement.  R-factors based
 on F^2^ are statistically about twice as large as those based on F, and R-
 factors based on ALL data will be even larger.
;
 
_refine_ls_structure_factor_coef  Fsqd
_refine_ls_matrix_type            full
_refine_ls_weighting_scheme       calc
_refine_ls_weighting_details
 'calc w=1/[\s^2^(Fo^2^)+(0.0451P)^2^+5.9354P] where P=(Fo^2^+2Fc^2^)/3'
_atom_sites_solution_primary      direct
_atom_sites_solution_secondary    difmap
_atom_sites_solution_hydrogens    geom
_refine_ls_hydrogen_treatment     constr
_refine_ls_extinction_method      none
_refine_ls_extinction_coef        ?
_refine_ls_number_reflns          19331
_refine_ls_number_parameters      818
_refine_ls_number_restraints      0
_refine_ls_R_factor_all           0.0686
_refine_ls_R_factor_gt            0.0485
_refine_ls_wR_factor_ref          0.1325
_refine_ls_wR_factor_gt           0.1160
_refine_ls_goodness_of_fit_ref    1.065
_refine_ls_restrained_S_all       1.065
_refine_ls_shift/su_max           0.001
_refine_ls_shift/su_mean          0.000
 
loop_
 _atom_site_label
 _atom_site_type_symbol
 _atom_site_fract_x
 _atom_site_fract_y
 _atom_site_fract_z
 _atom_site_U_iso_or_equiv
 _atom_site_adp_type
 _atom_site_occupancy
 _atom_site_symmetry_multiplicity
 _atom_site_calc_flag
 _atom_site_refinement_flags
 _atom_site_disorder_assembly
 _atom_site_disorder_group
Na Na 0.37126(6) -0.21098(4) 0.67078(5) 0.0605(3) Uani 1 1 d . . .
Ca Ca 0.14386(2) 0.209915(18) 0.331097(19) 0.03668(10) Uani 1 1 d . . .
Si1 Si 0.14621(3) 0.07913(3) 0.23835(3) 0.03645(12) Uani 1 1 d . . .
Si2 Si 0.01315(3) 0.15498(3) 0.18272(3) 0.03624(12) Uani 1 1 d . . .
Si3 Si 0.14932(3) 0.34662(3) 0.25194(3) 0.04501(15) Uani 1 1 d . . .
Si4 Si 0.09419(3) 0.35810(3) 0.36483(3) 0.04129(13) Uani 1 1 d . . .
Si5 Si 0.27856(2) 0.20877(2) 0.48632(3) 0.03043(11) Uani 1 1 d . . .
Si6 Si 0.15793(3) 0.12096(3) 0.47148(3) 0.03339(12) Uani 1 1 d . . .
N1 N 0.40025(8) -0.05885(7) 0.65589(8) 0.0322(3) Uani 1 1 d . . .
N2 N 0.33112(7) -0.05264(7) 0.70762(7) 0.0284(3) Uani 1 1 d . . .
N3 N 0.42314(8) -0.36847(7) 0.71266(8) 0.0350(3) Uani 1 1 d . . .
N4 N 0.31272(8) -0.36336(7) 0.66747(8) 0.0332(3) Uani 1 1 d . . .
N5 N 0.09432(8) 0.13996(7) 0.24049(8) 0.0329(3) Uani 1 1 d . . .
N6 N 0.12826(8) 0.31828(7) 0.31593(8) 0.0345(3) Uani 1 1 d . . .
N7 N 0.20046(8) 0.17464(7) 0.44327(8) 0.0305(3) Uani 1 1 d . . .
C1 C 0.36419(9) -0.09629(8) 0.68355(9) 0.0302(4) Uani 1 1 d . . .
C2 C 0.38940(10) 0.00527(9) 0.66236(10) 0.0357(4) Uani 1 1 d . . .
H2 H 0.4091 0.0396 0.6468 0.043 Uiso 1 1 calc R . .
C3 C 0.34571(10) 0.00922(9) 0.69491(10) 0.0340(4) Uani 1 1 d . . .
H3 H 0.3281 0.0470 0.7070 0.041 Uiso 1 1 calc R . .
C4 C 0.44655(11) -0.08467(10) 0.62617(11) 0.0421(5) Uani 1 1 d . . .
C5 C 0.42298(15) -0.08949(13) 0.55465(13) 0.0618(7) Uani 1 1 d . . .
C6 C 0.4686(2) -0.11584(18) 0.52782(17) 0.0917(12) Uani 1 1 d . . .
H6 H 0.4542 -0.1201 0.4793 0.110 Uiso 1 1 calc R . .
C7 C 0.53397(19) -0.13559(18) 0.5705(2) 0.0914(12) Uani 1 1 d . . .
H7 H 0.5641 -0.1536 0.5512 0.110 Uiso 1 1 calc R . .
C8 C 0.55642(14) -0.12959(14) 0.64097(17) 0.0682(8) Uani 1 1 d . . .
H8 H 0.6020 -0.1432 0.6696 0.082 Uiso 1 1 calc R . .
C9 C 0.51316(11) -0.10373(11) 0.67106(13) 0.0480(5) Uani 1 1 d . . .
C10 C 0.35053(18) -0.06808(16) 0.50667(13) 0.0755(10) Uani 1 1 d . . .
H10 H 0.3310 -0.0419 0.5346 0.091 Uiso 1 1 calc R . .
C11 C 0.3040(3) -0.1237(3) 0.4800(3) 0.161(3) Uani 1 1 d . . .
H11A H 0.3240 -0.1523 0.4559 0.241 Uiso 1 1 calc R . .
H11B H 0.2581 -0.1091 0.4479 0.241 Uiso 1 1 calc R . .
H11C H 0.2990 -0.1462 0.5186 0.241 Uiso 1 1 calc R . .
C12 C 0.3540(3) -0.0255(3) 0.4486(2) 0.144(2) Uani 1 1 d . . .
H12A H 0.3723 -0.0501 0.4197 0.216 Uiso 1 1 calc R . .
H12B H 0.3848 0.0107 0.4688 0.216 Uiso 1 1 calc R . .
H12C H 0.3072 -0.0100 0.4202 0.216 Uiso 1 1 calc R . .
C13 C 0.53906(12) -0.09670(12) 0.74875(13) 0.0536(6) Uani 1 1 d . . .
H13 H 0.5051 -0.0691 0.7589 0.064 Uiso 1 1 calc R . .
C14 C 0.5414(2) -0.15999(17) 0.78352(16) 0.0863(10) Uani 1 1 d . . .
H14A H 0.4944 -0.1781 0.7671 0.129 Uiso 1 1 calc R . .
H14B H 0.5590 -0.1539 0.8336 0.129 Uiso 1 1 calc R . .
H14C H 0.5723 -0.1890 0.7723 0.129 Uiso 1 1 calc R . .
C15 C 0.60978(17) -0.06430(17) 0.7791(2) 0.0915(11) Uani 1 1 d . . .
H15A H 0.6192 -0.0508 0.8264 0.137 Uiso 1 1 calc R . .
H15B H 0.6098 -0.0271 0.7510 0.137 Uiso 1 1 calc R . .
H15C H 0.6460 -0.0941 0.7792 0.137 Uiso 1 1 calc R . .
C16 C 0.28899(10) -0.06862(8) 0.74612(10) 0.0330(4) Uani 1 1 d . . .
C17 C 0.32189(12) -0.07236(10) 0.81827(11) 0.0426(5) Uani 1 1 d . . .
C18 C 0.27989(15) -0.09051(12) 0.85370(13) 0.0547(6) Uani 1 1 d . . .
H18 H 0.3001 -0.0939 0.9026 0.066 Uiso 1 1 calc R . .
C19 C 0.21084(15) -0.10338(12) 0.81958(15) 0.0589(7) Uani 1 1 d . . .
H19 H 0.1840 -0.1168 0.8447 0.071 Uiso 1 1 calc R . .
C20 C 0.17979(13) -0.09706(11) 0.74917(14) 0.0526(6) Uani 1 1 d . . .
H20 H 0.1313 -0.1049 0.7264 0.063 Uiso 1 1 calc R . .
C21 C 0.21810(10) -0.07936(9) 0.71034(11) 0.0388(4) Uani 1 1 d . . .
C22 C 0.39724(13) -0.05660(13) 0.85749(11) 0.0547(6) Uani 1 1 d . . .
H22 H 0.4176 -0.0451 0.8231 0.066 Uiso 1 1 calc R . .
C23 C 0.4375(2) -0.1136(2) 0.8985(2) 0.1050(13) Uani 1 1 d . . .
H23A H 0.4177 -0.1266 0.9318 0.157 Uiso 1 1 calc R . .
H23B H 0.4865 -0.1020 0.9232 0.157 Uiso 1 1 calc R . .
H23C H 0.4341 -0.1488 0.8669 0.157 Uiso 1 1 calc R . .
C24 C 0.4055(2) 0.00089(19) 0.90480(17) 0.0878(10) Uani 1 1 d . . .
H24A H 0.3801 0.0372 0.8773 0.132 Uiso 1 1 calc R . .
H24B H 0.4550 0.0117 0.9278 0.132 Uiso 1 1 calc R . .
H24C H 0.3867 -0.0094 0.9396 0.132 Uiso 1 1 calc R . .
C25 C 0.18303(11) -0.07224(11) 0.63262(12) 0.0462(5) Uani 1 1 d . . .
H25 H 0.2166 -0.0512 0.6159 0.055 Uiso 1 1 calc R . .
C26 C 0.1650(3) -0.13727(17) 0.59864(19) 0.1113(16) Uani 1 1 d . . .
H26A H 0.1325 -0.1589 0.6148 0.167 Uiso 1 1 calc R . .
H26B H 0.2075 -0.1626 0.6109 0.167 Uiso 1 1 calc R . .
H26C H 0.1432 -0.1322 0.5484 0.167 Uiso 1 1 calc R . .
C27 C 0.11855(13) -0.03092(15) 0.61227(17) 0.0697(8) Uani 1 1 d . . .
H27A H 0.0834 -0.0524 0.6248 0.105 Uiso 1 1 calc R . .
H27B H 0.0998 -0.0235 0.5623 0.105 Uiso 1 1 calc R . .
H27C H 0.1308 0.0098 0.6365 0.105 Uiso 1 1 calc R . .
C28 C 0.37035(9) -0.32629(9) 0.68273(9) 0.0321(4) Uani 1 1 d . . .
C29 C 0.39854(12) -0.42935(9) 0.71528(12) 0.0427(5) Uani 1 1 d . . .
H29 H 0.4259 -0.4661 0.7338 0.051 Uiso 1 1 calc R . .
C30 C 0.32905(11) -0.42635(9) 0.68675(11) 0.0403(4) Uani 1 1 d . . .
H30 H 0.2973 -0.4603 0.6808 0.048 Uiso 1 1 calc R . .
C31 C 0.49575(10) -0.35134(10) 0.73743(12) 0.0417(5) Uani 1 1 d . . .
C32 C 0.52626(13) -0.34401(12) 0.68921(14) 0.0558(6) Uani 1 1 d . . .
C33 C 0.59644(16) -0.32576(14) 0.7155(2) 0.0754(9) Uani 1 1 d . . .
H33 H 0.6189 -0.3192 0.6845 0.090 Uiso 1 1 calc R . .
C34 C 0.63337(14) -0.31716(15) 0.7846(2) 0.0771(10) Uani 1 1 d . . .
H34 H 0.6809 -0.3049 0.8008 0.093 Uiso 1 1 calc R . .
C35 C 0.60254(12) -0.32600(13) 0.83070(16) 0.0619(7) Uani 1 1 d . . .
H35 H 0.6293 -0.3205 0.8786 0.074 Uiso 1 1 calc R . .
C36 C 0.53222(10) -0.34306(10) 0.80835(12) 0.0436(5) Uani 1 1 d . . .
C37 C 0.48677(17) -0.35611(15) 0.61309(15) 0.0715(8) Uani 1 1 d . . .
H37 H 0.4420 -0.3775 0.6074 0.086 Uiso 1 1 calc R . .
C38 C 0.5261(2) -0.40022(18) 0.5823(2) 0.0995(13) Uani 1 1 d . . .
H38A H 0.5668 -0.3780 0.5808 0.149 Uiso 1 1 calc R . .
H38B H 0.4951 -0.4125 0.5354 0.149 Uiso 1 1 calc R . .
H38C H 0.5413 -0.4383 0.6110 0.149 Uiso 1 1 calc R . .
C39 C 0.4685(2) -0.29422(19) 0.5721(2) 0.1059(15) Uani 1 1 d . . .
H39A H 0.4463 -0.2650 0.5937 0.159 Uiso 1 1 calc R . .
H39B H 0.4365 -0.3031 0.5246 0.159 Uiso 1 1 calc R . .
H39C H 0.5111 -0.2748 0.5718 0.159 Uiso 1 1 calc R . .
C40 C 0.49960(11) -0.35399(11) 0.86009(11) 0.0452(5) Uani 1 1 d . . .
H40 H 0.4481 -0.3581 0.8343 0.054 Uiso 1 1 calc R . .
C41 C 0.52676(15) -0.41597(13) 0.89979(15) 0.0633(7) Uani 1 1 d . . .
H41A H 0.5162 -0.4515 0.8672 0.095 Uiso 1 1 calc R . .
H41B H 0.5041 -0.4231 0.9322 0.095 Uiso 1 1 calc R . .
H41C H 0.5773 -0.4130 0.9253 0.095 Uiso 1 1 calc R . .
C42 C 0.51296(16) -0.29901(14) 0.91079(15) 0.0659(7) Uani 1 1 d . . .
H42A H 0.5631 -0.2950 0.9377 0.099 Uiso 1 1 calc R . .
H42B H 0.4891 -0.3071 0.9420 0.099 Uiso 1 1 calc R . .
H42C H 0.4952 -0.2596 0.8852 0.099 Uiso 1 1 calc R . .
C43 C 0.24257(10) -0.34096(9) 0.62899(10) 0.0359(4) Uani 1 1 d . . .
C44 C 0.20235(10) -0.32144(9) 0.66542(10) 0.0366(4) Uani 1 1 d . . .
C45 C 0.13374(11) -0.30362(11) 0.62640(12) 0.0483(5) Uani 1 1 d . . .
H45 H 0.1047 -0.2906 0.6493 0.058 Uiso 1 1 calc R . .
C46 C 0.10720(13) -0.30452(13) 0.55521(13) 0.0591(6) Uani 1 1 d . . .
H46 H 0.0602 -0.2925 0.5297 0.071 Uiso 1 1 calc R . .
C47 C 0.14853(14) -0.32267(13) 0.52099(12) 0.0600(6) Uani 1 1 d . . .
H47 H 0.1299 -0.3221 0.4719 0.072 Uiso 1 1 calc R . .
C48 C 0.21730(12) -0.34188(11) 0.55689(11) 0.0475(5) Uani 1 1 d . . .
C49 C 0.23185(10) -0.31839(9) 0.74381(10) 0.0367(4) Uani 1 1 d . . .
H49 H 0.2616 -0.3568 0.7617 0.044 Uiso 1 1 calc R . .
C50 C 0.27814(12) -0.25967(11) 0.77063(11) 0.0467(5) Uani 1 1 d . . .
H50A H 0.3185 -0.2625 0.7578 0.070 Uiso 1 1 calc R . .
H50B H 0.2941 -0.2576 0.8210 0.070 Uiso 1 1 calc R . .
H50C H 0.2514 -0.2214 0.7502 0.070 Uiso 1 1 calc R . .
C51 C 0.17551(12) -0.31891(12) 0.77327(13) 0.0516(5) Uani 1 1 d . . .
H51A H 0.1516 -0.2778 0.7646 0.077 Uiso 1 1 calc R . .
H51B H 0.1969 -0.3267 0.8231 0.077 Uiso 1 1 calc R . .
H51C H 0.1418 -0.3526 0.7510 0.077 Uiso 1 1 calc R . .
C52 C 0.26137(16) -0.36362(13) 0.51821(12) 0.0611(7) Uani 1 1 d . . .
H52 H 0.3111 -0.3646 0.5516 0.073 Uiso 1 1 calc R . .
C53 C 0.2409(3) -0.43107(18) 0.4902(2) 0.1041(13) Uani 1 1 d . . .
H53A H 0.2451 -0.4597 0.5283 0.156 Uiso 1 1 calc R . .
H53B H 0.2719 -0.4455 0.4680 0.156 Uiso 1 1 calc R . .
H53C H 0.1927 -0.4311 0.4563 0.156 Uiso 1 1 calc R . .
C54 C 0.2561(2) -0.3182(2) 0.45965(18) 0.0965(12) Uani 1 1 d . . .
H54A H 0.2094 -0.3210 0.4230 0.145 Uiso 1 1 calc R . .
H54B H 0.2909 -0.3298 0.4410 0.145 Uiso 1 1 calc R . .
H54C H 0.2647 -0.2746 0.4774 0.145 Uiso 1 1 calc R . .
C55 C 0.23818(11) 0.09701(12) 0.29841(13) 0.0510(5) Uani 1 1 d . . .
H55A H 0.2545 0.1351 0.2824 0.077 Uiso 1 1 calc R . .
H55B H 0.2682 0.0610 0.2991 0.077 Uiso 1 1 calc R . .
H55C H 0.2398 0.1043 0.3451 0.077 Uiso 1 1 calc R . .
C56 C 0.12287(14) 0.00191(11) 0.26832(14) 0.0550(6) Uani 1 1 d . . .
H56A H 0.1241 0.0070 0.3151 0.082 Uiso 1 1 calc R . .
H56B H 0.1564 -0.0308 0.2685 0.082 Uiso 1 1 calc R . .
H56C H 0.0759 -0.0108 0.2370 0.082 Uiso 1 1 calc R . .
C57 C 0.14926(14) 0.06467(13) 0.15133(13) 0.0566(6) Uani 1 1 d . . .
H57A H 0.1026 0.0536 0.1180 0.085 Uiso 1 1 calc R . .
H57B H 0.1814 0.0297 0.1547 0.085 Uiso 1 1 calc R . .
H57C H 0.1654 0.1032 0.1359 0.085 Uiso 1 1 calc R . .
C58 C -0.03181(11) 0.21037(11) 0.22221(12) 0.0469(5) Uani 1 1 d . . .
H58A H -0.0365 0.1897 0.2619 0.070 Uiso 1 1 calc R . .
H58B H -0.0781 0.2210 0.1878 0.070 Uiso 1 1 calc R . .
H58C H -0.0042 0.2493 0.2374 0.070 Uiso 1 1 calc R . .
C59 C -0.04319(13) 0.08250(13) 0.15311(18) 0.0704(8) Uani 1 1 d . . .
H59A H -0.0215 0.0526 0.1317 0.106 Uiso 1 1 calc R . .
H59B H -0.0892 0.0949 0.1194 0.106 Uiso 1 1 calc R . .
H59C H -0.0483 0.0622 0.1928 0.106 Uiso 1 1 calc R . .
C60 C 0.00939(14) 0.19440(15) 0.10135(12) 0.0630(7) Uani 1 1 d . . .
H60A H 0.0321 0.2360 0.1125 0.094 Uiso 1 1 calc R . .
H60B H -0.0394 0.1998 0.0698 0.094 Uiso 1 1 calc R . .
H60C H 0.0335 0.1679 0.0793 0.094 Uiso 1 1 calc R . .
C61 C 0.18639(13) 0.28003(13) 0.21650(13) 0.0565(6) Uani 1 1 d . . .
H61A H 0.2312 0.2666 0.2516 0.085 Uiso 1 1 calc R . .
H61B H 0.1933 0.2949 0.1754 0.085 Uiso 1 1 calc R . .
H61C H 0.1540 0.2441 0.2040 0.085 Uiso 1 1 calc R . .
C62 C 0.07224(15) 0.37982(18) 0.17789(15) 0.0784(9) Uani 1 1 d . . .
H62A H 0.0358 0.3473 0.1608 0.118 Uiso 1 1 calc R . .
H62B H 0.0867 0.3926 0.1406 0.118 Uiso 1 1 calc R . .
H62C H 0.0540 0.4168 0.1937 0.118 Uiso 1 1 calc R . .
C63 C 0.21823(14) 0.40984(13) 0.27823(18) 0.0698(8) Uani 1 1 d . . .
H63A H 0.2022 0.4463 0.2970 0.105 Uiso 1 1 calc R . .
H63B H 0.2273 0.4233 0.2379 0.105 Uiso 1 1 calc R . .
H63C H 0.2611 0.3929 0.3135 0.105 Uiso 1 1 calc R . .
C64 C 0.01261(15) 0.40406(14) 0.31334(17) 0.0732(8) Uani 1 1 d . . .
H64A H 0.0250 0.4418 0.2933 0.110 Uiso 1 1 calc R . .
H64B H -0.0106 0.4171 0.3438 0.110 Uiso 1 1 calc R . .
H64C H -0.0188 0.3771 0.2763 0.110 Uiso 1 1 calc R . .
C65 C 0.15479(18) 0.41692(12) 0.42580(14) 0.0692(8) Uani 1 1 d . . .
H65A H 0.1977 0.3953 0.4554 0.104 Uiso 1 1 calc R . .
H65B H 0.1324 0.4358 0.4545 0.104 Uiso 1 1 calc R . .
H65C H 0.1660 0.4504 0.3994 0.104 Uiso 1 1 calc R . .
C66 C 0.06771(13) 0.30072(12) 0.41857(13) 0.0524(6) Uani 1 1 d . . .
H66A H 0.0294 0.2742 0.3883 0.079 Uiso 1 1 calc R . .
H66B H 0.0525 0.3243 0.4504 0.079 Uiso 1 1 calc R . .
H66C H 0.1075 0.2737 0.4451 0.079 Uiso 1 1 calc R . .
C67 C 0.27687(11) 0.27404(10) 0.54626(11) 0.0434(5) Uani 1 1 d . . .
H67A H 0.2396 0.3041 0.5214 0.065 Uiso 1 1 calc R . .
H67B H 0.3217 0.2962 0.5635 0.065 Uiso 1 1 calc R . .
H67C H 0.2684 0.2559 0.5852 0.065 Uiso 1 1 calc R . .
C68 C 0.30987(11) 0.24767(11) 0.42272(11) 0.0423(5) Uani 1 1 d . . .
H68A H 0.3129 0.2158 0.3900 0.063 Uiso 1 1 calc R . .
H68B H 0.3560 0.2664 0.4476 0.063 Uiso 1 1 calc R . .
H68C H 0.2770 0.2810 0.3975 0.063 Uiso 1 1 calc R . .
C69 C 0.34849(11) 0.15219(11) 0.53988(11) 0.0456(5) Uani 1 1 d . . .
H69A H 0.3368 0.1355 0.5776 0.068 Uiso 1 1 calc R . .
H69B H 0.3932 0.1746 0.5591 0.068 Uiso 1 1 calc R . .
H69C H 0.3519 0.1170 0.5109 0.068 Uiso 1 1 calc R . .
C70 C 0.15256(15) 0.14238(13) 0.55611(13) 0.0587(6) Uani 1 1 d . . .
H70A H 0.1989 0.1391 0.5932 0.088 Uiso 1 1 calc R . .
H70B H 0.1206 0.1132 0.5654 0.088 Uiso 1 1 calc R . .
H70C H 0.1353 0.1860 0.5538 0.088 Uiso 1 1 calc R . .
C71 C 0.06565(11) 0.11247(11) 0.40776(12) 0.0472(5) Uani 1 1 d . . .
H71A H 0.0402 0.1520 0.4062 0.071 Uiso 1 1 calc R . .
H71B H 0.0432 0.0774 0.4219 0.071 Uiso 1 1 calc R . .
H71C H 0.0653 0.1036 0.3619 0.071 Uiso 1 1 calc R . .
C72 C 0.19666(13) 0.03913(11) 0.48307(13) 0.0503(5) Uani 1 1 d . . .
H72A H 0.2018 0.0261 0.4406 0.075 Uiso 1 1 calc R . .
H72B H 0.1659 0.0092 0.4933 0.075 Uiso 1 1 calc R . .
H72C H 0.2424 0.0394 0.5214 0.075 Uiso 1 1 calc R . .
 
loop_
 _atom_site_aniso_label
 _atom_site_aniso_U_11
 _atom_site_aniso_U_22
 _atom_site_aniso_U_33
 _atom_site_aniso_U_23
 _atom_site_aniso_U_13
 _atom_site_aniso_U_12
Na 0.0841(7) 0.0274(4) 0.0663(6) 0.0013(4) 0.0254(5) 0.0024(4)
Ca 0.0456(2) 0.03027(19) 0.02802(18) 0.00063(14) 0.00759(16) -0.00091(16)
Si1 0.0382(3) 0.0360(3) 0.0390(3) -0.0038(2) 0.0194(2) 0.0032(2)
Si2 0.0293(2) 0.0398(3) 0.0383(3) -0.0082(2) 0.0117(2) -0.0020(2)
Si3 0.0360(3) 0.0489(3) 0.0493(3) 0.0153(3) 0.0156(3) -0.0085(2)
Si4 0.0429(3) 0.0315(3) 0.0450(3) 0.0015(2) 0.0123(3) 0.0056(2)
Si5 0.0263(2) 0.0347(3) 0.0285(2) 0.00286(19) 0.00867(19) 0.00062(19)
Si6 0.0335(3) 0.0348(3) 0.0337(3) 0.0019(2) 0.0152(2) -0.0032(2)
N1 0.0336(8) 0.0323(8) 0.0332(8) 0.0073(6) 0.0159(7) 0.0036(6)
N2 0.0295(7) 0.0275(7) 0.0281(7) 0.0020(6) 0.0112(6) 0.0007(6)
N3 0.0380(8) 0.0310(8) 0.0392(8) 0.0049(6) 0.0186(7) 0.0067(6)
N4 0.0363(8) 0.0279(7) 0.0348(8) -0.0046(6) 0.0131(7) 0.0021(6)
N5 0.0306(8) 0.0353(8) 0.0333(8) -0.0042(6) 0.0130(6) 0.0003(6)
N6 0.0307(8) 0.0319(8) 0.0370(8) 0.0042(6) 0.0092(7) -0.0034(6)
N7 0.0280(7) 0.0338(8) 0.0292(7) 0.0023(6) 0.0105(6) -0.0002(6)
C1 0.0319(9) 0.0294(9) 0.0293(8) 0.0045(7) 0.0121(7) 0.0011(7)
C2 0.0366(10) 0.0300(9) 0.0409(10) 0.0085(8) 0.0156(8) -0.0002(7)
C3 0.0368(9) 0.0271(9) 0.0375(10) 0.0020(7) 0.0139(8) 0.0007(7)
C4 0.0468(11) 0.0404(11) 0.0502(12) 0.0151(9) 0.0312(10) 0.0110(9)
C5 0.0800(18) 0.0713(17) 0.0492(13) 0.0223(12) 0.0418(13) 0.0354(14)
C6 0.123(3) 0.113(3) 0.0690(18) 0.0356(18) 0.070(2) 0.065(2)
C7 0.105(3) 0.102(3) 0.108(3) 0.043(2) 0.085(2) 0.054(2)
C8 0.0547(15) 0.0728(18) 0.094(2) 0.0280(16) 0.0473(15) 0.0225(13)
C9 0.0403(11) 0.0451(12) 0.0665(14) 0.0162(10) 0.0292(11) 0.0073(9)
C10 0.101(2) 0.093(2) 0.0338(12) 0.0115(13) 0.0266(14) 0.0512(19)
C11 0.126(4) 0.126(4) 0.142(4) -0.020(3) -0.044(3) 0.034(3)
C12 0.209(5) 0.176(4) 0.089(3) 0.079(3) 0.103(3) 0.142(4)
C13 0.0371(11) 0.0536(13) 0.0625(15) 0.0066(11) 0.0111(10) 0.0075(10)
C14 0.097(2) 0.083(2) 0.0567(17) 0.0186(15) 0.0053(16) -0.0203(18)
C15 0.0589(18) 0.071(2) 0.124(3) -0.010(2) 0.0124(19) -0.0147(15)
C16 0.0392(10) 0.0287(9) 0.0369(9) 0.0031(7) 0.0210(8) 0.0022(7)
C17 0.0539(12) 0.0418(11) 0.0377(10) 0.0052(8) 0.0241(10) 0.0079(9)
C18 0.0783(17) 0.0517(13) 0.0502(13) 0.0144(10) 0.0424(13) 0.0139(12)
C19 0.0741(17) 0.0489(13) 0.0788(18) 0.0180(12) 0.0570(15) 0.0107(12)
C20 0.0471(12) 0.0427(12) 0.0813(17) 0.0096(11) 0.0393(12) 0.0012(9)
C21 0.0384(10) 0.0312(9) 0.0508(11) 0.0032(8) 0.0217(9) 0.0016(8)
C22 0.0554(14) 0.0745(17) 0.0306(10) 0.0062(10) 0.0127(10) 0.0053(12)
C23 0.082(2) 0.114(3) 0.092(3) 0.041(2) 0.004(2) 0.028(2)
C24 0.096(2) 0.106(3) 0.0643(18) -0.0253(18) 0.0339(18) -0.028(2)
C25 0.0347(10) 0.0462(12) 0.0526(12) 0.0011(10) 0.0115(9) -0.0029(9)
C26 0.144(4) 0.064(2) 0.070(2) -0.0168(16) -0.019(2) 0.007(2)
C27 0.0416(13) 0.0797(19) 0.088(2) 0.0345(16) 0.0253(13) 0.0106(12)
C28 0.0348(9) 0.0310(9) 0.0315(9) 0.0004(7) 0.0141(8) 0.0037(7)
C29 0.0510(12) 0.0280(9) 0.0539(12) 0.0039(8) 0.0255(10) 0.0077(8)
C30 0.0476(11) 0.0255(9) 0.0484(11) -0.0031(8) 0.0195(9) -0.0003(8)
C31 0.0349(10) 0.0364(10) 0.0596(13) 0.0127(9) 0.0249(10) 0.0092(8)
C32 0.0577(14) 0.0530(13) 0.0734(16) 0.0225(12) 0.0436(13) 0.0187(11)
C33 0.0624(17) 0.0685(18) 0.123(3) 0.0350(18) 0.067(2) 0.0192(14)
C34 0.0375(13) 0.0728(19) 0.127(3) 0.0306(19) 0.0392(17) 0.0076(12)
C35 0.0317(11) 0.0611(15) 0.0885(19) 0.0172(14) 0.0186(12) 0.0020(10)
C36 0.0301(9) 0.0409(11) 0.0577(13) 0.0112(9) 0.0148(9) 0.0052(8)
C37 0.086(2) 0.082(2) 0.0700(17) 0.0226(15) 0.0556(17) 0.0250(16)
C38 0.148(4) 0.085(2) 0.101(3) 0.026(2) 0.087(3) 0.048(2)
C39 0.152(4) 0.110(3) 0.085(2) 0.047(2) 0.078(3) 0.076(3)
C40 0.0340(10) 0.0491(12) 0.0461(12) 0.0037(9) 0.0088(9) -0.0038(9)
C41 0.0594(15) 0.0604(16) 0.0657(16) 0.0179(13) 0.0195(13) 0.0012(12)
C42 0.0653(16) 0.0616(16) 0.0669(17) -0.0088(13) 0.0214(14) -0.0103(13)
C43 0.0349(9) 0.0311(9) 0.0350(9) -0.0041(7) 0.0063(8) -0.0023(7)
C44 0.0356(10) 0.0309(9) 0.0401(10) -0.0002(8) 0.0110(8) 0.0003(7)
C45 0.0372(11) 0.0489(12) 0.0530(13) 0.0066(10) 0.0114(10) 0.0039(9)
C46 0.0392(12) 0.0671(16) 0.0543(14) 0.0091(12) 0.0001(11) 0.0003(11)
C47 0.0566(14) 0.0683(16) 0.0370(12) -0.0037(11) -0.0015(11) -0.0086(12)
C48 0.0504(12) 0.0478(12) 0.0372(11) -0.0111(9) 0.0093(9) -0.0062(10)
C49 0.0360(10) 0.0351(10) 0.0396(10) 0.0022(8) 0.0151(8) 0.0051(8)
C50 0.0560(13) 0.0459(12) 0.0394(11) -0.0055(9) 0.0199(10) -0.0058(10)
C51 0.0501(13) 0.0543(13) 0.0579(14) 0.0078(11) 0.0293(11) 0.0066(10)
C52 0.0748(17) 0.0670(16) 0.0390(12) -0.0184(11) 0.0193(12) -0.0014(13)
C53 0.149(4) 0.080(2) 0.095(3) -0.041(2) 0.060(3) -0.008(2)
C54 0.135(3) 0.102(3) 0.071(2) -0.0019(19) 0.061(2) 0.006(2)
C55 0.0386(11) 0.0529(13) 0.0607(14) -0.0012(11) 0.0184(10) 0.0097(10)
C56 0.0702(16) 0.0372(11) 0.0652(15) -0.0019(10) 0.0347(13) 0.0033(11)
C57 0.0664(15) 0.0605(15) 0.0548(14) -0.0069(11) 0.0365(13) 0.0087(12)
C58 0.0360(10) 0.0502(12) 0.0517(12) -0.0099(10) 0.0139(9) 0.0049(9)
C59 0.0418(13) 0.0557(15) 0.106(2) -0.0278(15) 0.0210(14) -0.0095(11)
C60 0.0555(15) 0.090(2) 0.0353(12) 0.0011(12) 0.0084(11) 0.0078(13)
C61 0.0549(14) 0.0716(16) 0.0536(13) -0.0001(12) 0.0326(12) -0.0176(12)
C62 0.0603(16) 0.108(2) 0.0601(16) 0.0440(17) 0.0156(13) -0.0018(16)
C63 0.0558(15) 0.0514(15) 0.108(2) 0.0119(15) 0.0383(16) -0.0150(12)
C64 0.0644(17) 0.0615(17) 0.087(2) 0.0110(15) 0.0224(15) 0.0278(14)
C65 0.096(2) 0.0433(13) 0.0553(15) -0.0097(11) 0.0152(15) -0.0073(13)
C66 0.0552(13) 0.0541(13) 0.0585(14) 0.0013(11) 0.0334(12) 0.0080(11)
C67 0.0427(11) 0.0434(11) 0.0390(11) -0.0053(9) 0.0101(9) -0.0021(9)
C68 0.0350(10) 0.0512(12) 0.0410(11) 0.0043(9) 0.0152(9) -0.0066(9)
C69 0.0353(10) 0.0530(13) 0.0444(11) 0.0087(10) 0.0110(9) 0.0089(9)
C70 0.0711(16) 0.0685(16) 0.0497(13) -0.0068(12) 0.0381(13) -0.0186(13)
C71 0.0343(10) 0.0470(12) 0.0585(13) 0.0009(10) 0.0160(10) -0.0076(9)
C72 0.0549(13) 0.0389(11) 0.0543(13) 0.0121(10) 0.0181(11) 0.0018(10)
 
_geom_special_details
;
 All esds (except the esd in the dihedral angle between two l.s. planes)
 are estimated using the full covariance matrix.  The cell esds are taken
 into account individually in the estimation of esds in distances, angles
 and torsion angles; correlations between esds in cell parameters are only
 used when they are defined by crystal symmetry.  An approximate (isotropic)
 treatment of cell esds is used for estimating esds involving l.s. planes.
;
 
loop_
 _geom_bond_atom_site_label_1
 _geom_bond_atom_site_label_2
 _geom_bond_distance
 _geom_bond_site_symmetry_2
 _geom_bond_publ_flag
Na C1 2.441(2) . ?
Na C28 2.442(2) . ?
Ca N5 2.3096(16) . ?
Ca N6 2.3096(16) . ?
Ca N7 2.3108(15) . ?
Ca Si3 3.3493(7) . ?
Ca Si5 3.3765(6) . ?
Ca Si1 3.3860(6) . ?
Ca Si6 3.4109(6) . ?
Ca Si2 3.4462(6) . ?
Ca Si4 3.4473(7) . ?
Si1 N5 1.6883(16) . ?
Si1 C56 1.875(2) . ?
Si1 C55 1.878(2) . ?
Si1 C57 1.880(2) . ?
Si2 N5 1.6845(16) . ?
Si2 C60 1.876(3) . ?
Si2 C59 1.878(3) . ?
Si2 C58 1.880(2) . ?
Si3 N6 1.6788(17) . ?
Si3 C63 1.877(3) . ?
Si3 C62 1.883(3) . ?
Si3 C61 1.889(3) . ?
Si4 N6 1.6831(17) . ?
Si4 C65 1.874(3) . ?
Si4 C66 1.878(2) . ?
Si4 C64 1.889(3) . ?
Si5 N7 1.6848(15) . ?
Si5 C67 1.874(2) . ?
Si5 C69 1.880(2) . ?
Si5 C68 1.888(2) . ?
Si6 N7 1.6808(15) . ?
Si6 C71 1.876(2) . ?
Si6 C72 1.878(2) . ?
Si6 C70 1.881(2) . ?
N1 C1 1.366(2) . ?
N1 C2 1.385(2) . ?
N1 C4 1.445(2) . ?
N2 C1 1.359(2) . ?
N2 C3 1.387(2) . ?
N2 C16 1.447(2) . ?
N3 C28 1.362(2) . ?
N3 C29 1.390(3) . ?
N3 C31 1.441(3) . ?
N4 C28 1.362(2) . ?
N4 C30 1.390(2) . ?
N4 C43 1.447(2) . ?
C2 C3 1.338(3) . ?
C2 H2 0.9500 . ?
C3 H3 0.9500 . ?
C4 C5 1.392(3) . ?
C4 C9 1.400(3) . ?
C5 C6 1.396(3) . ?
C5 C10 1.521(4) . ?
C6 C7 1.372(5) . ?
C6 H6 0.9500 . ?
C7 C8 1.374(5) . ?
C7 H7 0.9500 . ?
C8 C9 1.398(3) . ?
C8 H8 0.9500 . ?
C9 C13 1.515(4) . ?
C10 C11 1.484(6) . ?
C10 C12 1.540(5) . ?
C10 H10 1.0000 . ?
C11 H11A 0.9800 . ?
C11 H11B 0.9800 . ?
C11 H11C 0.9800 . ?
C12 H12A 0.9800 . ?
C12 H12B 0.9800 . ?
C12 H12C 0.9800 . ?
C13 C14 1.512(4) . ?
C13 C15 1.521(4) . ?
C13 H13 1.0000 . ?
C14 H14A 0.9800 . ?
C14 H14B 0.9800 . ?
C14 H14C 0.9800 . ?
C15 H15A 0.9800 . ?
C15 H15B 0.9800 . ?
C15 H15C 0.9800 . ?
C16 C21 1.391(3) . ?
C16 C17 1.403(3) . ?
C17 C18 1.405(3) . ?
C17 C22 1.499(3) . ?
C18 C19 1.362(4) . ?
C18 H18 0.9500 . ?
C19 C20 1.372(4) . ?
C19 H19 0.9500 . ?
C20 C21 1.397(3) . ?
C20 H20 0.9500 . ?
C21 C25 1.516(3) . ?
C22 C23 1.525(4) . ?
C22 C24 1.533(4) . ?
C22 H22 1.0000 . ?
C23 H23A 0.9800 . ?
C23 H23B 0.9800 . ?
C23 H23C 0.9800 . ?
C24 H24A 0.9800 . ?
C24 H24B 0.9800 . ?
C24 H24C 0.9800 . ?
C25 C27 1.516(3) . ?
C25 C26 1.523(4) . ?
C25 H25 1.0000 . ?
C26 H26A 0.9800 . ?
C26 H26B 0.9800 . ?
C26 H26C 0.9800 . ?
C27 H27A 0.9800 . ?
C27 H27B 0.9800 . ?
C27 H27C 0.9800 . ?
C29 C30 1.336(3) . ?
C29 H29 0.9500 . ?
C30 H30 0.9500 . ?
C31 C36 1.396(3) . ?
C31 C32 1.399(3) . ?
C32 C33 1.401(4) . ?
C32 C37 1.509(4) . ?
C33 C34 1.365(5) . ?
C33 H33 0.9500 . ?
C34 C35 1.369(4) . ?
C34 H34 0.9500 . ?
C35 C36 1.400(3) . ?
C35 H35 0.9500 . ?
C36 C40 1.508(3) . ?
C37 C39 1.526(4) . ?
C37 C38 1.538(4) . ?
C37 H37 1.0000 . ?
C38 H38A 0.9800 . ?
C38 H38B 0.9800 . ?
C38 H38C 0.9800 . ?
C39 H39A 0.9800 . ?
C39 H39B 0.9800 . ?
C39 H39C 0.9800 . ?
C40 C42 1.524(4) . ?
C40 C41 1.534(3) . ?
C40 H40 1.0000 . ?
C41 H41A 0.9800 . ?
C41 H41B 0.9800 . ?
C41 H41C 0.9800 . ?
C42 H42A 0.9800 . ?
C42 H42B 0.9800 . ?
C42 H42C 0.9800 . ?
C43 C48 1.398(3) . ?
C43 C44 1.399(3) . ?
C44 C45 1.395(3) . ?
C44 C49 1.520(3) . ?
C45 C46 1.379(3) . ?
C45 H45 0.9500 . ?
C46 C47 1.374(4) . ?
C46 H46 0.9500 . ?
C47 C48 1.395(3) . ?
C47 H47 0.9500 . ?
C48 C52 1.515(3) . ?
C49 C51 1.526(3) . ?
C49 C50 1.534(3) . ?
C49 H49 1.0000 . ?
C50 H50A 0.9800 . ?
C50 H50B 0.9800 . ?
C50 H50C 0.9800 . ?
C51 H51A 0.9800 . ?
C51 H51B 0.9800 . ?
C51 H51C 0.9800 . ?
C52 C54 1.529(4) . ?
C52 C53 1.533(4) . ?
C52 H52 1.0000 . ?
C53 H53A 0.9800 . ?
C53 H53B 0.9800 . ?
C53 H53C 0.9800 . ?
C54 H54A 0.9800 . ?
C54 H54B 0.9800 . ?
C54 H54C 0.9800 . ?
C55 H55A 0.9800 . ?
C55 H55B 0.9800 . ?
C55 H55C 0.9800 . ?
C56 H56A 0.9800 . ?
C56 H56B 0.9800 . ?
C56 H56C 0.9800 . ?
C57 H57A 0.9800 . ?
C57 H57B 0.9800 . ?
C57 H57C 0.9800 . ?
C58 H58A 0.9800 . ?
C58 H58B 0.9800 . ?
C58 H58C 0.9800 . ?
C59 H59A 0.9800 . ?
C59 H59B 0.9800 . ?
C59 H59C 0.9800 . ?
C60 H60A 0.9800 . ?
C60 H60B 0.9800 . ?
C60 H60C 0.9800 . ?
C61 H61A 0.9800 . ?
C61 H61B 0.9800 . ?
C61 H61C 0.9800 . ?
C62 H62A 0.9800 . ?
C62 H62B 0.9800 . ?
C62 H62C 0.9800 . ?
C63 H63A 0.9800 . ?
C63 H63B 0.9800 . ?
C63 H63C 0.9800 . ?
C64 H64A 0.9800 . ?
C64 H64B 0.9800 . ?
C64 H64C 0.9800 . ?
C65 H65A 0.9800 . ?
C65 H65B 0.9800 . ?
C65 H65C 0.9800 . ?
C66 H66A 0.9800 . ?
C66 H66B 0.9800 . ?
C66 H66C 0.9800 . ?
C67 H67A 0.9800 . ?
C67 H67B 0.9800 . ?
C67 H67C 0.9800 . ?
C68 H68A 0.9800 . ?
C68 H68B 0.9800 . ?
C68 H68C 0.9800 . ?
C69 H69A 0.9800 . ?
C69 H69B 0.9800 . ?
C69 H69C 0.9800 . ?
C70 H70A 0.9800 . ?
C70 H70B 0.9800 . ?
C70 H70C 0.9800 . ?
C71 H71A 0.9800 . ?
C71 H71B 0.9800 . ?
C71 H71C 0.9800 . ?
C72 H72A 0.9800 . ?
C72 H72B 0.9800 . ?
C72 H72C 0.9800 . ?
 
loop_
 _geom_angle_atom_site_label_1
 _geom_angle_atom_site_label_2
 _geom_angle_atom_site_label_3
 _geom_angle
 _geom_angle_site_symmetry_1
 _geom_angle_site_symmetry_3
 _geom_angle_publ_flag
C1 Na C28 165.78(8) . . ?
N5 Ca N6 121.50(6) . . ?
N5 Ca N7 121.57(6) . . ?
N6 Ca N7 116.55(6) . . ?
N5 Ca Si3 103.24(4) . . ?
N6 Ca Si3 27.41(4) . . ?
N7 Ca Si3 132.92(4) . . ?
N5 Ca Si5 136.83(4) . . ?
N6 Ca Si5 99.20(4) . . ?
N7 Ca Si5 27.02(4) . . ?
Si3 Ca Si5 108.072(17) . . ?
N5 Ca Si1 26.90(4) . . ?
N6 Ca Si1 139.20(4) . . ?
N7 Ca Si1 102.14(4) . . ?
Si3 Ca Si1 113.706(19) . . ?
Si5 Ca Si1 110.975(17) . . ?
N5 Ca Si6 102.93(4) . . ?
N6 Ca Si6 128.48(4) . . ?
N7 Ca Si6 26.16(4) . . ?
Si3 Ca Si6 153.380(19) . . ?
Si5 Ca Si6 53.169(13) . . ?
Si1 Ca Si6 92.064(16) . . ?
N5 Ca Si2 25.46(4) . . ?
N6 Ca Si2 100.81(4) . . ?
N7 Ca Si2 136.52(4) . . ?
Si3 Ca Si2 90.370(17) . . ?
Si5 Ca Si2 159.966(18) . . ?
Si1 Ca Si2 52.344(14) . . ?
Si6 Ca Si2 111.739(17) . . ?
N5 Ca Si4 132.33(4) . . ?
N6 Ca Si4 25.39(4) . . ?
N7 Ca Si4 98.97(4) . . ?
Si3 Ca Si4 52.784(17) . . ?
Si5 Ca Si4 90.623(16) . . ?
Si1 Ca Si4 158.062(19) . . ?
Si6 Ca Si4 104.518(17) . . ?
Si2 Ca Si4 107.172(17) . . ?
N5 Si1 C56 113.35(10) . . ?
N5 Si1 C55 109.07(9) . . ?
C56 Si1 C55 106.16(12) . . ?
N5 Si1 C57 114.43(10) . . ?
C56 Si1 C57 107.34(12) . . ?
C55 Si1 C57 105.93(12) . . ?
N5 Si1 Ca 38.23(5) . . ?
C56 Si1 Ca 116.62(8) . . ?
C55 Si1 Ca 71.90(7) . . ?
C57 Si1 Ca 134.89(9) . . ?
N5 Si2 C60 114.49(10) . . ?
N5 Si2 C59 114.16(11) . . ?
C60 Si2 C59 104.98(15) . . ?
N5 Si2 C58 109.35(9) . . ?
C60 Si2 C58 106.09(12) . . ?
C59 Si2 C58 107.21(12) . . ?
N5 Si2 Ca 36.11(5) . . ?
C60 Si2 Ca 114.51(9) . . ?
C59 Si2 Ca 138.15(11) . . ?
C58 Si2 Ca 75.29(7) . . ?
N6 Si3 C63 115.14(12) . . ?
N6 Si3 C62 112.93(11) . . ?
C63 Si3 C62 106.79(14) . . ?
N6 Si3 C61 109.08(10) . . ?
C63 Si3 C61 105.03(12) . . ?
C62 Si3 C61 107.33(15) . . ?
N6 Si3 Ca 39.30(6) . . ?
C63 Si3 Ca 129.30(10) . . ?
C62 Si3 Ca 123.16(10) . . ?
C61 Si3 Ca 69.88(7) . . ?
N6 Si4 C65 114.52(12) . . ?
N6 Si4 C66 109.86(9) . . ?
C65 Si4 C66 106.93(13) . . ?
N6 Si4 C64 113.89(12) . . ?
C65 Si4 C64 105.65(14) . . ?
C66 Si4 C64 105.36(13) . . ?
N6 Si4 Ca 36.05(5) . . ?
C65 Si4 Ca 124.24(10) . . ?
C66 Si4 Ca 73.95(7) . . ?
C64 Si4 Ca 128.43(11) . . ?
N7 Si5 C67 114.02(9) . . ?
N7 Si5 C69 114.40(9) . . ?
C67 Si5 C69 105.97(10) . . ?
N7 Si5 C68 109.42(8) . . ?
C67 Si5 C68 105.08(10) . . ?
C69 Si5 C68 107.35(10) . . ?
N7 Si5 Ca 38.54(5) . . ?
C67 Si5 Ca 114.74(7) . . ?
C69 Si5 Ca 137.95(8) . . ?
C68 Si5 Ca 72.47(6) . . ?
N7 Si6 C71 110.30(9) . . ?
N7 Si6 C72 113.82(9) . . ?
C71 Si6 C72 105.94(11) . . ?
N7 Si6 C70 113.98(10) . . ?
C71 Si6 C70 106.05(12) . . ?
C72 Si6 C70 106.15(12) . . ?
N7 Si6 Ca 37.31(5) . . ?
C71 Si6 Ca 73.47(7) . . ?
C72 Si6 Ca 120.27(8) . . ?
C70 Si6 Ca 132.09(9) . . ?
C1 N1 C2 112.54(15) . . ?
C1 N1 C4 122.54(16) . . ?
C2 N1 C4 124.86(16) . . ?
C1 N2 C3 112.49(15) . . ?
C1 N2 C16 123.86(15) . . ?
C3 N2 C16 123.54(15) . . ?
C28 N3 C29 112.07(16) . . ?
C28 N3 C31 123.31(16) . . ?
C29 N3 C31 124.62(16) . . ?
C28 N4 C30 112.63(16) . . ?
C28 N4 C43 123.46(15) . . ?
C30 N4 C43 123.61(16) . . ?
Si2 N5 Si1 126.66(10) . . ?
Si2 N5 Ca 118.43(8) . . ?
Si1 N5 Ca 114.87(8) . . ?
Si3 N6 Si4 128.06(10) . . ?
Si3 N6 Ca 113.28(9) . . ?
Si4 N6 Ca 118.56(8) . . ?
Si6 N7 Si5 128.99(9) . . ?
Si6 N7 Ca 116.53(8) . . ?
Si5 N7 Ca 114.45(7) . . ?
N2 C1 N1 102.17(15) . . ?
N2 C1 Na 140.46(13) . . ?
N1 C1 Na 117.24(12) . . ?
C3 C2 N1 106.29(16) . . ?
C3 C2 H2 126.9 . . ?
N1 C2 H2 126.9 . . ?
C2 C3 N2 106.50(16) . . ?
C2 C3 H3 126.7 . . ?
N2 C3 H3 126.7 . . ?
C5 C4 C9 123.2(2) . . ?
C5 C4 N1 118.71(19) . . ?
C9 C4 N1 118.06(19) . . ?
C4 C5 C6 117.1(3) . . ?
C4 C5 C10 122.4(2) . . ?
C6 C5 C10 120.4(2) . . ?
C7 C6 C5 121.0(3) . . ?
C7 C6 H6 119.5 . . ?
C5 C6 H6 119.5 . . ?
C6 C7 C8 120.8(2) . . ?
C6 C7 H7 119.6 . . ?
C8 C7 H7 119.6 . . ?
C7 C8 C9 121.0(3) . . ?
C7 C8 H8 119.5 . . ?
C9 C8 H8 119.5 . . ?
C8 C9 C4 116.8(2) . . ?
C8 C9 C13 120.3(2) . . ?
C4 C9 C13 122.9(2) . . ?
C11 C10 C5 110.6(3) . . ?
C11 C10 C12 112.7(4) . . ?
C5 C10 C12 110.9(3) . . ?
C11 C10 H10 107.5 . . ?
C5 C10 H10 107.5 . . ?
C12 C10 H10 107.5 . . ?
C10 C11 H11A 109.5 . . ?
C10 C11 H11B 109.5 . . ?
H11A C11 H11B 109.5 . . ?
C10 C11 H11C 109.5 . . ?
H11A C11 H11C 109.5 . . ?
H11B C11 H11C 109.5 . . ?
C10 C12 H12A 109.5 . . ?
C10 C12 H12B 109.5 . . ?
H12A C12 H12B 109.5 . . ?
C10 C12 H12C 109.5 . . ?
H12A C12 H12C 109.5 . . ?
H12B C12 H12C 109.5 . . ?
C14 C13 C9 111.5(2) . . ?
C14 C13 C15 110.4(2) . . ?
C9 C13 C15 112.1(3) . . ?
C14 C13 H13 107.5 . . ?
C9 C13 H13 107.5 . . ?
C15 C13 H13 107.5 . . ?
C13 C14 H14A 109.5 . . ?
C13 C14 H14B 109.5 . . ?
H14A C14 H14B 109.5 . . ?
C13 C14 H14C 109.5 . . ?
H14A C14 H14C 109.5 . . ?
H14B C14 H14C 109.5 . . ?
C13 C15 H15A 109.5 . . ?
C13 C15 H15B 109.5 . . ?
H15A C15 H15B 109.5 . . ?
C13 C15 H15C 109.5 . . ?
H15A C15 H15C 109.5 . . ?
H15B C15 H15C 109.5 . . ?
C21 C16 C17 123.03(18) . . ?
C21 C16 N2 118.91(17) . . ?
C17 C16 N2 118.06(17) . . ?
C16 C17 C18 116.4(2) . . ?
C16 C17 C22 123.29(18) . . ?
C18 C17 C22 120.2(2) . . ?
C19 C18 C17 121.6(2) . . ?
C19 C18 H18 119.2 . . ?
C17 C18 H18 119.2 . . ?
C18 C19 C20 120.5(2) . . ?
C18 C19 H19 119.8 . . ?
C20 C19 H19 119.8 . . ?
C19 C20 C21 121.3(2) . . ?
C19 C20 H20 119.3 . . ?
C21 C20 H20 119.3 . . ?
C16 C21 C20 117.1(2) . . ?
C16 C21 C25 122.14(18) . . ?
C20 C21 C25 120.7(2) . . ?
C17 C22 C23 111.4(3) . . ?
C17 C22 C24 111.1(2) . . ?
C23 C22 C24 110.9(3) . . ?
C17 C22 H22 107.8 . . ?
C23 C22 H22 107.8 . . ?
C24 C22 H22 107.8 . . ?
C22 C23 H23A 109.5 . . ?
C22 C23 H23B 109.5 . . ?
H23A C23 H23B 109.5 . . ?
C22 C23 H23C 109.5 . . ?
H23A C23 H23C 109.5 . . ?
H23B C23 H23C 109.5 . . ?
C22 C24 H24A 109.5 . . ?
C22 C24 H24B 109.5 . . ?
H24A C24 H24B 109.5 . . ?
C22 C24 H24C 109.5 . . ?
H24A C24 H24C 109.5 . . ?
H24B C24 H24C 109.5 . . ?
C21 C25 C27 111.3(2) . . ?
C21 C25 C26 110.1(2) . . ?
C27 C25 C26 110.7(3) . . ?
C21 C25 H25 108.2 . . ?
C27 C25 H25 108.2 . . ?
C26 C25 H25 108.2 . . ?
C25 C26 H26A 109.5 . . ?
C25 C26 H26B 109.5 . . ?
H26A C26 H26B 109.5 . . ?
C25 C26 H26C 109.5 . . ?
H26A C26 H26C 109.5 . . ?
H26B C26 H26C 109.5 . . ?
C25 C27 H27A 109.5 . . ?
C25 C27 H27B 109.5 . . ?
H27A C27 H27B 109.5 . . ?
C25 C27 H27C 109.5 . . ?
H27A C27 H27C 109.5 . . ?
H27B C27 H27C 109.5 . . ?
N4 C28 N3 102.40(15) . . ?
N4 C28 Na 125.95(13) . . ?
N3 C28 Na 131.19(13) . . ?
C30 C29 N3 106.89(17) . . ?
C30 C29 H29 126.6 . . ?
N3 C29 H29 126.6 . . ?
C29 C30 N4 106.01(17) . . ?
C29 C30 H30 127.0 . . ?
N4 C30 H30 127.0 . . ?
C36 C31 C32 123.2(2) . . ?
C36 C31 N3 118.41(18) . . ?
C32 C31 N3 118.4(2) . . ?
C31 C32 C33 116.3(3) . . ?
C31 C32 C37 122.4(2) . . ?
C33 C32 C37 121.3(2) . . ?
C34 C33 C32 121.7(3) . . ?
C34 C33 H33 119.1 . . ?
C32 C33 H33 119.1 . . ?
C33 C34 C35 120.7(3) . . ?
C33 C34 H34 119.7 . . ?
C35 C34 H34 119.7 . . ?
C34 C35 C36 121.0(3) . . ?
C34 C35 H35 119.5 . . ?
C36 C35 H35 119.5 . . ?
C31 C36 C35 117.0(2) . . ?
C31 C36 C40 122.72(18) . . ?
C35 C36 C40 120.2(2) . . ?
C32 C37 C39 111.5(3) . . ?
C32 C37 C38 112.9(3) . . ?
C39 C37 C38 109.5(2) . . ?
C32 C37 H37 107.5 . . ?
C39 C37 H37 107.5 . . ?
C38 C37 H37 107.5 . . ?
C37 C38 H38A 109.5 . . ?
C37 C38 H38B 109.5 . . ?
H38A C38 H38B 109.5 . . ?
C37 C38 H38C 109.5 . . ?
H38A C38 H38C 109.5 . . ?
H38B C38 H38C 109.5 . . ?
C37 C39 H39A 109.5 . . ?
C37 C39 H39B 109.5 . . ?
H39A C39 H39B 109.5 . . ?
C37 C39 H39C 109.5 . . ?
H39A C39 H39C 109.5 . . ?
H39B C39 H39C 109.5 . . ?
C36 C40 C42 112.2(2) . . ?
C36 C40 C41 110.4(2) . . ?
C42 C40 C41 109.7(2) . . ?
C36 C40 H40 108.1 . . ?
C42 C40 H40 108.1 . . ?
C41 C40 H40 108.1 . . ?
C40 C41 H41A 109.5 . . ?
C40 C41 H41B 109.5 . . ?
H41A C41 H41B 109.5 . . ?
C40 C41 H41C 109.5 . . ?
H41A C41 H41C 109.5 . . ?
H41B C41 H41C 109.5 . . ?
C40 C42 H42A 109.5 . . ?
C40 C42 H42B 109.5 . . ?
H42A C42 H42B 109.5 . . ?
C40 C42 H42C 109.5 . . ?
H42A C42 H42C 109.5 . . ?
H42B C42 H42C 109.5 . . ?
C48 C43 C44 122.99(19) . . ?
C48 C43 N4 118.29(18) . . ?
C44 C43 N4 118.68(17) . . ?
C45 C44 C43 116.91(19) . . ?
C45 C44 C49 121.06(19) . . ?
C43 C44 C49 122.02(17) . . ?
C46 C45 C44 121.4(2) . . ?
C46 C45 H45 119.3 . . ?
C44 C45 H45 119.3 . . ?
C47 C46 C45 120.3(2) . . ?
C47 C46 H46 119.9 . . ?
C45 C46 H46 119.9 . . ?
C46 C47 C48 121.3(2) . . ?
C46 C47 H47 119.4 . . ?
C48 C47 H47 119.4 . . ?
C47 C48 C43 117.2(2) . . ?
C47 C48 C52 120.5(2) . . ?
C43 C48 C52 122.3(2) . . ?
C44 C49 C51 112.92(17) . . ?
C44 C49 C50 111.32(16) . . ?
C51 C49 C50 109.24(18) . . ?
C44 C49 H49 107.7 . . ?
C51 C49 H49 107.7 . . ?
C50 C49 H49 107.7 . . ?
C49 C50 H50A 109.5 . . ?
C49 C50 H50B 109.5 . . ?
H50A C50 H50B 109.5 . . ?
C49 C50 H50C 109.5 . . ?
H50A C50 H50C 109.5 . . ?
H50B C50 H50C 109.5 . . ?
C49 C51 H51A 109.5 . . ?
C49 C51 H51B 109.5 . . ?
H51A C51 H51B 109.5 . . ?
C49 C51 H51C 109.5 . . ?
H51A C51 H51C 109.5 . . ?
H51B C51 H51C 109.5 . . ?
C48 C52 C54 112.0(2) . . ?
C48 C52 C53 110.5(3) . . ?
C54 C52 C53 110.4(3) . . ?
C48 C52 H52 107.9 . . ?
C54 C52 H52 107.9 . . ?
C53 C52 H52 107.9 . . ?
C52 C53 H53A 109.5 . . ?
C52 C53 H53B 109.5 . . ?
H53A C53 H53B 109.5 . . ?
C52 C53 H53C 109.5 . . ?
H53A C53 H53C 109.5 . . ?
H53B C53 H53C 109.5 . . ?
C52 C54 H54A 109.5 . . ?
C52 C54 H54B 109.5 . . ?
H54A C54 H54B 109.5 . . ?
C52 C54 H54C 109.5 . . ?
H54A C54 H54C 109.5 . . ?
H54B C54 H54C 109.5 . . ?
Si1 C55 H55A 109.5 . . ?
Si1 C55 H55B 109.5 . . ?
H55A C55 H55B 109.5 . . ?
Si1 C55 H55C 109.5 . . ?
H55A C55 H55C 109.5 . . ?
H55B C55 H55C 109.5 . . ?
Si1 C56 H56A 109.5 . . ?
Si1 C56 H56B 109.5 . . ?
H56A C56 H56B 109.5 . . ?
Si1 C56 H56C 109.5 . . ?
H56A C56 H56C 109.5 . . ?
H56B C56 H56C 109.5 . . ?
Si1 C57 H57A 109.5 . . ?
Si1 C57 H57B 109.5 . . ?
H57A C57 H57B 109.5 . . ?
Si1 C57 H57C 109.5 . . ?
H57A C57 H57C 109.5 . . ?
H57B C57 H57C 109.5 . . ?
Si2 C58 H58A 109.5 . . ?
Si2 C58 H58B 109.5 . . ?
H58A C58 H58B 109.5 . . ?
Si2 C58 H58C 109.5 . . ?
H58A C58 H58C 109.5 . . ?
H58B C58 H58C 109.5 . . ?
Si2 C59 H59A 109.5 . . ?
Si2 C59 H59B 109.5 . . ?
H59A C59 H59B 109.5 . . ?
Si2 C59 H59C 109.5 . . ?
H59A C59 H59C 109.5 . . ?
H59B C59 H59C 109.5 . . ?
Si2 C60 H60A 109.5 . . ?
Si2 C60 H60B 109.5 . . ?
H60A C60 H60B 109.5 . . ?
Si2 C60 H60C 109.5 . . ?
H60A C60 H60C 109.5 . . ?
H60B C60 H60C 109.5 . . ?
Si3 C61 H61A 109.5 . . ?
Si3 C61 H61B 109.5 . . ?
H61A C61 H61B 109.5 . . ?
Si3 C61 H61C 109.5 . . ?
H61A C61 H61C 109.5 . . ?
H61B C61 H61C 109.5 . . ?
Si3 C62 H62A 109.5 . . ?
Si3 C62 H62B 109.5 . . ?
H62A C62 H62B 109.5 . . ?
Si3 C62 H62C 109.5 . . ?
H62A C62 H62C 109.5 . . ?
H62B C62 H62C 109.5 . . ?
Si3 C63 H63A 109.5 . . ?
Si3 C63 H63B 109.5 . . ?
H63A C63 H63B 109.5 . . ?
Si3 C63 H63C 109.5 . . ?
H63A C63 H63C 109.5 . . ?
H63B C63 H63C 109.5 . . ?
Si4 C64 H64A 109.5 . . ?
Si4 C64 H64B 109.5 . . ?
H64A C64 H64B 109.5 . . ?
Si4 C64 H64C 109.5 . . ?
H64A C64 H64C 109.5 . . ?
H64B C64 H64C 109.5 . . ?
Si4 C65 H65A 109.5 . . ?
Si4 C65 H65B 109.5 . . ?
H65A C65 H65B 109.5 . . ?
Si4 C65 H65C 109.5 . . ?
H65A C65 H65C 109.5 . . ?
H65B C65 H65C 109.5 . . ?
Si4 C66 H66A 109.5 . . ?
Si4 C66 H66B 109.5 . . ?
H66A C66 H66B 109.5 . . ?
Si4 C66 H66C 109.5 . . ?
H66A C66 H66C 109.5 . . ?
H66B C66 H66C 109.5 . . ?
Si5 C67 H67A 109.5 . . ?
Si5 C67 H67B 109.5 . . ?
H67A C67 H67B 109.5 . . ?
Si5 C67 H67C 109.5 . . ?
H67A C67 H67C 109.5 . . ?
H67B C67 H67C 109.5 . . ?
Si5 C68 H68A 109.5 . . ?
Si5 C68 H68B 109.5 . . ?
H68A C68 H68B 109.5 . . ?
Si5 C68 H68C 109.5 . . ?
H68A C68 H68C 109.5 . . ?
H68B C68 H68C 109.5 . . ?
Si5 C69 H69A 109.5 . . ?
Si5 C69 H69B 109.5 . . ?
H69A C69 H69B 109.5 . . ?
Si5 C69 H69C 109.5 . . ?
H69A C69 H69C 109.5 . . ?
H69B C69 H69C 109.5 . . ?
Si6 C70 H70A 109.5 . . ?
Si6 C70 H70B 109.5 . . ?
H70A C70 H70B 109.5 . . ?
Si6 C70 H70C 109.5 . . ?
H70A C70 H70C 109.5 . . ?
H70B C70 H70C 109.5 . . ?
Si6 C71 H71A 109.5 . . ?
Si6 C71 H71B 109.5 . . ?
H71A C71 H71B 109.5 . . ?
Si6 C71 H71C 109.5 . . ?
H71A C71 H71C 109.5 . . ?
H71B C71 H71C 109.5 . . ?
Si6 C72 H72A 109.5 . . ?
Si6 C72 H72B 109.5 . . ?
H72A C72 H72B 109.5 . . ?
Si6 C72 H72C 109.5 . . ?
H72A C72 H72C 109.5 . . ?
H72B C72 H72C 109.5 . . ?
 
_diffrn_measured_fraction_theta_max    0.987
_diffrn_reflns_theta_full              27.53
_diffrn_measured_fraction_theta_full   0.987
_refine_diff_density_max    0.593
_refine_diff_density_min   -0.451
_refine_diff_density_rms    0.047

#=====>END

#======================================================
 
data_compound6
 
_audit_creation_method            SHELXL-97
_chemical_name_systematic
;
 ?
;
_chemical_name_common             ?
_chemical_melting_point           ?
_chemical_formula_moiety          
'C54 H72 K N4, C18 H54 Ca N3 Si6'
_chemical_formula_sum
 'C72 H126 Ca K N7 Si6'
_chemical_formula_weight          1337.52
 
loop_
 _atom_type_symbol
 _atom_type_description
 _atom_type_scat_dispersion_real
 _atom_type_scat_dispersion_imag
 _atom_type_scat_source
 'C'  'C'   0.0033   0.0016
 'International Tables Vol C Tables 4.2.6.8 and 6.1.1.4'
 'H'  'H'   0.0000   0.0000
 'International Tables Vol C Tables 4.2.6.8 and 6.1.1.4'
 'N'  'N'   0.0061   0.0033
 'International Tables Vol C Tables 4.2.6.8 and 6.1.1.4'
 'Si'  'Si'   0.0817   0.0704
 'International Tables Vol C Tables 4.2.6.8 and 6.1.1.4'
 'Ca'  'Ca'   0.2262   0.3064
 'International Tables Vol C Tables 4.2.6.8 and 6.1.1.4'
 'K'  'K'   0.2009   0.2494
 'International Tables Vol C Tables 4.2.6.8 and 6.1.1.4'
 
_symmetry_cell_setting            monoclinic
_symmetry_space_group_name_H-M    'C 2/c'
 
loop_
 _symmetry_equiv_pos_as_xyz
 'x, y, z'
 '-x, y, -z+1/2'
 'x+1/2, y+1/2, z'
 '-x+1/2, y+1/2, -z+1/2'
 '-x, -y, -z'
 'x, -y, z-1/2'
 '-x+1/2, -y+1/2, -z'
 'x+1/2, -y+1/2, z-1/2'
 
_cell_length_a                    30.4315(5)
_cell_length_b                    18.4286(3)
_cell_length_c                    17.3923(2)
_cell_angle_alpha                 90.00
_cell_angle_beta                  119.3030(10)
_cell_angle_gamma                 90.00
_cell_volume                      8505.7(2)
_cell_formula_units_Z             4
_cell_measurement_temperature     150(2)
_cell_measurement_reflns_used     50997
_cell_measurement_theta_min        2.910
_cell_measurement_theta_max        27.485
 
_exptl_crystal_description        block
_exptl_crystal_colour             colourless
_exptl_crystal_size_max           0.60
_exptl_crystal_size_mid           0.60
_exptl_crystal_size_min           0.60
_exptl_crystal_density_meas       ?
_exptl_crystal_density_diffrn     1.044
_exptl_crystal_density_method     'not measured'
_exptl_crystal_F_000              2920
_exptl_absorpt_coefficient_mu     0.247
_exptl_absorpt_correction_type    none
_exptl_absorpt_correction_T_min   ?
_exptl_absorpt_correction_T_max   ?
_exptl_absorpt_process_details    ?
 
_exptl_special_details
;
 ?
;
 
_diffrn_ambient_temperature       150(2)
_diffrn_radiation_wavelength      0.71073
_diffrn_radiation_type            MoK\a
_diffrn_radiation_source          'fine-focus sealed tube'
_diffrn_radiation_monochromator   graphite
_diffrn_measurement_device_type   'Nonius Kappa CCD'
_diffrn_measurement_method        '320 2.0 degree images with \w scans'
_diffrn_standards_number          0
_diffrn_standards_decay_%         0
_diffrn_reflns_number             69096
_diffrn_reflns_av_R_equivalents   0.0384
_diffrn_reflns_av_sigmaI/netI     0.0215
_diffrn_reflns_limit_h_min        -39
_diffrn_reflns_limit_h_max        39
_diffrn_reflns_limit_k_min        -23
_diffrn_reflns_limit_k_max        23
_diffrn_reflns_limit_l_min        -22
_diffrn_reflns_limit_l_max        22
_diffrn_reflns_theta_min          4.82
_diffrn_reflns_theta_max          27.47
_reflns_number_total              9660
_reflns_number_gt                 7730
_reflns_threshold_expression      >2sigma(I)
 
_computing_data_collection        'Collect (Nonius BV, 1997-2000)'
_computing_cell_refinement         'HKL Scalepack (Otwinski & Minor, 1997)'
_computing_data_reduction         
;
 DENZO-SCALEPACK Z. Otwinowski and W. Minor, " 
 Processing of X-ray Diffraction Data Collected in Oscillation Mode ", 
 Methods in Enzymology, Volume 276: Macromolecular Crystallography, 
 part A, p.307-326, 1997,C.W. Carter, Jr. & R. M. Sweet, Eds., Academic Press.
;
_computing_structure_solution     
; 
 SIR97- Altomare A., Burla M.C., Camalli M., Cascarano G.L., Giacovazzo C. , 
 Guagliardi A., Moliterni A.G.G., Polidori G.,Spagna R. 
 (1999) J. Appl. Cryst. 32, 115-119
;
_computing_structure_refinement   
;
 SHELXL97 -Program for Crystal Structure Analysis (Release 97-2). 
 Sheldrick, G.M., Instit\"ut f\"ur Anorganische Chemie der Universit\"at, 
 Tammanstrasse 4, D-3400 G\"ottingen, Germany, 1998 
;
_computing_molecular_graphics  

'ORTEP3 for Windows - Farrugia, L. J. J. Appl. Crystallogr. 1997, 30, 565'

_computing_publication_material    
;
 'WinGX publication routines, Farrugia, 
 L. J., J. Appl. Crystallogr., 1999, 32, 837-838
; 
 
_refine_special_details
;
 Refinement of F^2^ against ALL reflections.  The weighted R-factor wR and
 goodness of fit S are based on F^2^, conventional R-factors R are based
 on F, with F set to zero for negative F^2^. The threshold expression of
 F^2^ > 2sigma(F^2^) is used only for calculating R-factors(gt) etc. and is
 not relevant to the choice of reflections for refinement.  R-factors based
 on F^2^ are statistically about twice as large as those based on F, and R-
 factors based on ALL data will be even larger.
;
 
_refine_ls_structure_factor_coef  Fsqd
_refine_ls_matrix_type            full
_refine_ls_weighting_scheme       calc
_refine_ls_weighting_details
 'calc w=1/[\s^2^(Fo^2^)+(0.0588P)^2^+13.0665P] where P=(Fo^2^+2Fc^2^)/3'
_atom_sites_solution_primary      direct
_atom_sites_solution_secondary    difmap
_atom_sites_solution_hydrogens    geom
_refine_ls_hydrogen_treatment     constr
_refine_ls_extinction_method      none
_refine_ls_extinction_coef        ?
_refine_ls_number_reflns          9660
_refine_ls_number_parameters      412
_refine_ls_number_restraints      0
_refine_ls_R_factor_all           0.0662
_refine_ls_R_factor_gt            0.0494
_refine_ls_wR_factor_ref          0.1384
_refine_ls_wR_factor_gt           0.1233
_refine_ls_goodness_of_fit_ref    1.038
_refine_ls_restrained_S_all       1.038
_refine_ls_shift/su_max           0.000
_refine_ls_shift/su_mean          0.000
 
loop_
 _atom_site_label
 _atom_site_type_symbol
 _atom_site_fract_x
 _atom_site_fract_y
 _atom_site_fract_z
 _atom_site_U_iso_or_equiv
 _atom_site_adp_type
 _atom_site_occupancy
 _atom_site_symmetry_multiplicity
 _atom_site_calc_flag
 _atom_site_refinement_flags
 _atom_site_disorder_assembly
 _atom_site_disorder_group
Ca Ca 0.0000 0.22498(3) 0.2500 0.03294(13) Uani 1 2 d S . .
K K 0.2500 0.2500 0.0000 0.0569(2) Uani 1 2 d S . .
Si1 Si 0.09070(2) 0.26664(4) 0.45453(4) 0.05063(18) Uani 1 1 d . . .
Si2 Si -0.00217(2) 0.35766(3) 0.39033(4) 0.03946(15) Uani 1 1 d . . .
Si3 Si 0.01240(2) 0.05682(3) 0.17652(3) 0.03254(13) Uani 1 1 d . . .
N1 N 0.15364(5) 0.36141(8) -0.02071(9) 0.0267(3) Uani 1 1 d . . .
N2 N 0.19950(5) 0.41233(8) 0.10256(9) 0.0253(3) Uani 1 1 d . . .
N3 N 0.03211(6) 0.29136(8) 0.37869(10) 0.0322(3) Uani 1 1 d . . .
N4 N 0.0000 0.09865(11) 0.2500 0.0281(4) Uani 1 2 d S . .
C1 C 0.20154(7) 0.36001(9) 0.04912(11) 0.0271(3) Uani 1 1 d . . .
C2 C 0.15230(7) 0.44465(10) 0.06711(12) 0.0312(4) Uani 1 1 d . . .
H2 H 0.1425 0.4822 0.0930 0.037 Uiso 1 1 calc R . .
C3 C 0.12332(7) 0.41230(10) -0.01106(12) 0.0322(4) Uani 1 1 d . . .
H3 H 0.0890 0.4224 -0.0515 0.039 Uiso 1 1 calc R . .
C4 C 0.14045(7) 0.31298(10) -0.09427(11) 0.0308(4) Uani 1 1 d . . .
C5 C 0.12107(9) 0.24456(11) -0.09284(13) 0.0398(5) Uani 1 1 d . . .
C6 C 0.11682(11) 0.19451(12) -0.15638(15) 0.0553(6) Uani 1 1 d . . .
H6 H 0.1044 0.1472 -0.1565 0.066 Uiso 1 1 calc R . .
C7 C 0.13028(12) 0.21245(14) -0.21901(16) 0.0624(7) Uani 1 1 d . . .
H7 H 0.1280 0.1772 -0.2606 0.075 Uiso 1 1 calc R . .
C8 C 0.14704(10) 0.28175(13) -0.22140(14) 0.0493(6) Uani 1 1 d . . .
H8 H 0.1550 0.2940 -0.2662 0.059 Uiso 1 1 calc R . .
C9 C 0.15244(8) 0.33381(10) -0.15930(12) 0.0351(4) Uani 1 1 d . . .
C10 C 0.10489(9) 0.22300(12) -0.02585(15) 0.0463(5) Uani 1 1 d . . .
H10 H 0.1073 0.2668 0.0100 0.056 Uiso 1 1 calc R . .
C11 C 0.13934(11) 0.16446(17) 0.03626(18) 0.0640(7) Uani 1 1 d . . .
H11A H 0.1363 0.1203 0.0026 0.096 Uiso 1 1 calc R . .
H11B H 0.1296 0.1539 0.0811 0.096 Uiso 1 1 calc R . .
H11C H 0.1743 0.1816 0.0651 0.096 Uiso 1 1 calc R . .
C12 C 0.05014(11) 0.19696(17) -0.0725(2) 0.0659(7) Uani 1 1 d . . .
H12A H 0.0472 0.1528 -0.1060 0.099 Uiso 1 1 calc R . .
H12B H 0.0284 0.2348 -0.1127 0.099 Uiso 1 1 calc R . .
H12C H 0.0397 0.1866 -0.0285 0.099 Uiso 1 1 calc R . .
C13 C 0.16972(9) 0.41032(11) -0.16406(13) 0.0406(5) Uani 1 1 d . . .
H13 H 0.1825 0.4335 -0.1049 0.049 Uiso 1 1 calc R . .
C14 C 0.21179(13) 0.41153(16) -0.1873(2) 0.0731(8) Uani 1 1 d . . .
H14A H 0.2405 0.3832 -0.1437 0.110 Uiso 1 1 calc R . .
H14B H 0.2224 0.4617 -0.1872 0.110 Uiso 1 1 calc R . .
H14C H 0.1996 0.3904 -0.2459 0.110 Uiso 1 1 calc R . .
C15 C 0.12508(14) 0.45419(17) -0.2309(3) 0.0923(12) Uani 1 1 d . . .
H15A H 0.1094 0.4291 -0.2879 0.138 Uiso 1 1 calc R . .
H15B H 0.1366 0.5023 -0.2375 0.138 Uiso 1 1 calc R . .
H15C H 0.1004 0.4595 -0.2105 0.138 Uiso 1 1 calc R . .
C16 C 0.24282(6) 0.43342(9) 0.18478(11) 0.0271(3) Uani 1 1 d . . .
C17 C 0.27439(7) 0.48756(10) 0.18294(12) 0.0314(4) Uani 1 1 d . . .
C18 C 0.31702(8) 0.50529(12) 0.26277(13) 0.0407(5) Uani 1 1 d . . .
H18 H 0.3394 0.5417 0.2638 0.049 Uiso 1 1 calc R . .
C19 C 0.32706(8) 0.47068(13) 0.34018(13) 0.0435(5) Uani 1 1 d . . .
H19 H 0.3564 0.4832 0.3937 0.052 Uiso 1 1 calc R . .
C20 C 0.29483(8) 0.41807(12) 0.34019(12) 0.0378(4) Uani 1 1 d . . .
H20 H 0.3021 0.3951 0.3940 0.045 Uiso 1 1 calc R . .
C21 C 0.25178(7) 0.39811(10) 0.26243(11) 0.0309(4) Uani 1 1 d . . .
C22 C 0.26448(8) 0.52440(11) 0.09766(13) 0.0369(4) Uani 1 1 d . . .
H22 H 0.2280 0.5173 0.0539 0.044 Uiso 1 1 calc R . .
C23 C 0.29509(12) 0.48836(17) 0.06023(18) 0.0631(7) Uani 1 1 d . . .
H23A H 0.3311 0.4965 0.1003 0.095 Uiso 1 1 calc R . .
H23B H 0.2857 0.5093 0.0024 0.095 Uiso 1 1 calc R . .
H23C H 0.2882 0.4361 0.0539 0.095 Uiso 1 1 calc R . .
C24 C 0.27421(10) 0.60592(13) 0.10921(17) 0.0535(6) Uani 1 1 d . . .
H24A H 0.2564 0.6268 0.1381 0.080 Uiso 1 1 calc R . .
H24B H 0.2621 0.6286 0.0513 0.080 Uiso 1 1 calc R . .
H24C H 0.3105 0.6148 0.1457 0.080 Uiso 1 1 calc R . .
C25 C 0.21744(8) 0.33819(12) 0.26203(13) 0.0410(5) Uani 1 1 d . . .
H25 H 0.1833 0.3465 0.2102 0.049 Uiso 1 1 calc R . .
C26 C 0.23615(12) 0.26479(13) 0.24929(19) 0.0614(7) Uani 1 1 d . . .
H26A H 0.2406 0.2667 0.1972 0.092 Uiso 1 1 calc R . .
H26B H 0.2114 0.2272 0.2411 0.092 Uiso 1 1 calc R . .
H26C H 0.2684 0.2533 0.3014 0.092 Uiso 1 1 calc R . .
C27 C 0.21179(10) 0.33735(17) 0.34459(17) 0.0610(7) Uani 1 1 d . . .
H27A H 0.2441 0.3246 0.3959 0.092 Uiso 1 1 calc R . .
H27B H 0.1863 0.3014 0.3375 0.092 Uiso 1 1 calc R . .
H27C H 0.2013 0.3855 0.3534 0.092 Uiso 1 1 calc R . .
C28 C 0.11786(9) 0.20428(15) 0.40237(19) 0.0573(6) Uani 1 1 d . . .
H28A H 0.0979 0.1596 0.3830 0.086 Uiso 1 1 calc R . .
H28B H 0.1528 0.1924 0.4456 0.086 Uiso 1 1 calc R . .
H28C H 0.1170 0.2285 0.3515 0.086 Uiso 1 1 calc R . .
C29 C 0.13620(12) 0.3440(2) 0.5031(3) 0.1132(17) Uani 1 1 d . . .
H29A H 0.1357 0.3731 0.4555 0.170 Uiso 1 1 calc R . .
H29B H 0.1702 0.3248 0.5405 0.170 Uiso 1 1 calc R . .
H29C H 0.1265 0.3743 0.5386 0.170 Uiso 1 1 calc R . .
C30 C 0.09263(14) 0.21539(19) 0.55033(17) 0.0805(10) Uani 1 1 d . . .
H30A H 0.0794 0.2463 0.5802 0.121 Uiso 1 1 calc R . .
H30B H 0.1275 0.2019 0.5920 0.121 Uiso 1 1 calc R . .
H30C H 0.0720 0.1715 0.5285 0.121 Uiso 1 1 calc R . .
C31 C 0.01720(13) 0.45099(14) 0.3762(3) 0.0836(10) Uani 1 1 d . . .
H31A H 0.0509 0.4617 0.4251 0.125 Uiso 1 1 calc R . .
H31B H -0.0069 0.4866 0.3756 0.125 Uiso 1 1 calc R . .
H31C H 0.0177 0.4535 0.3204 0.125 Uiso 1 1 calc R . .
C32 C -0.00019(17) 0.3599(2) 0.4994(3) 0.0995(13) Uani 1 1 d . . .
H32A H -0.0091 0.3120 0.5121 0.149 Uiso 1 1 calc R . .
H32B H -0.0243 0.3961 0.4977 0.149 Uiso 1 1 calc R . .
H32C H 0.0338 0.3729 0.5456 0.149 Uiso 1 1 calc R . .
C33 C -0.07005(10) 0.34629(16) 0.3048(3) 0.0814(11) Uani 1 1 d . . .
H33A H -0.0734 0.3491 0.2459 0.122 Uiso 1 1 calc R . .
H33B H -0.0901 0.3849 0.3114 0.122 Uiso 1 1 calc R . .
H33C H -0.0822 0.2990 0.3123 0.122 Uiso 1 1 calc R . .
C34 C 0.04734(10) 0.12069(13) 0.14131(17) 0.0506(6) Uani 1 1 d . . .
H34A H 0.0265 0.1636 0.1137 0.076 Uiso 1 1 calc R . .
H34B H 0.0548 0.0963 0.0989 0.076 Uiso 1 1 calc R . .
H34C H 0.0789 0.1355 0.1930 0.076 Uiso 1 1 calc R . .
C35 C 0.05250(10) -0.02691(13) 0.21839(18) 0.0521(6) Uani 1 1 d . . .
H35A H 0.0843 -0.0148 0.2712 0.078 Uiso 1 1 calc R . .
H35B H 0.0594 -0.0458 0.1727 0.078 Uiso 1 1 calc R . .
H35C H 0.0346 -0.0638 0.2332 0.078 Uiso 1 1 calc R . .
C36 C -0.04600(10) 0.02638(14) 0.07379(15) 0.0544(6) Uani 1 1 d . . .
H36A H -0.0644 -0.0088 0.0896 0.082 Uiso 1 1 calc R . .
H36B H -0.0364 0.0037 0.0333 0.082 Uiso 1 1 calc R . .
H36C H -0.0676 0.0684 0.0451 0.082 Uiso 1 1 calc R . .
 
loop_
 _atom_site_aniso_label
 _atom_site_aniso_U_11
 _atom_site_aniso_U_22
 _atom_site_aniso_U_33
 _atom_site_aniso_U_23
 _atom_site_aniso_U_13
 _atom_site_aniso_U_12
Ca 0.0432(3) 0.0223(2) 0.0244(2) 0.000 0.0096(2) 0.000
K 0.0660(5) 0.0560(4) 0.0489(4) -0.0030(3) 0.0282(4) 0.0301(4)
Si1 0.0317(3) 0.0496(4) 0.0480(4) -0.0198(3) 0.0019(3) 0.0043(3)
Si2 0.0337(3) 0.0304(3) 0.0498(3) -0.0104(2) 0.0170(3) -0.0001(2)
Si3 0.0386(3) 0.0265(2) 0.0308(3) -0.00039(19) 0.0157(2) 0.0045(2)
N1 0.0293(7) 0.0226(7) 0.0241(7) -0.0015(5) 0.0098(6) -0.0004(6)
N2 0.0255(7) 0.0234(7) 0.0244(7) -0.0029(5) 0.0102(6) 0.0016(5)
N3 0.0288(8) 0.0300(8) 0.0312(8) -0.0068(6) 0.0095(6) 0.0002(6)
N4 0.0312(11) 0.0228(10) 0.0261(10) 0.000 0.0108(8) 0.000
C1 0.0305(9) 0.0238(8) 0.0252(8) -0.0010(6) 0.0122(7) 0.0016(7)
C2 0.0280(9) 0.0290(9) 0.0346(9) -0.0028(7) 0.0137(7) 0.0054(7)
C3 0.0264(9) 0.0299(9) 0.0332(9) -0.0004(7) 0.0091(7) 0.0041(7)
C4 0.0357(9) 0.0257(8) 0.0229(8) -0.0028(6) 0.0081(7) -0.0029(7)
C5 0.0518(12) 0.0310(10) 0.0332(10) -0.0042(8) 0.0183(9) -0.0101(9)
C6 0.0875(19) 0.0330(11) 0.0449(12) -0.0134(9) 0.0321(13) -0.0230(12)
C7 0.105(2) 0.0418(13) 0.0417(12) -0.0193(10) 0.0372(14) -0.0197(13)
C8 0.0753(16) 0.0443(12) 0.0294(10) -0.0076(9) 0.0264(11) -0.0115(11)
C9 0.0428(10) 0.0300(9) 0.0252(8) -0.0009(7) 0.0110(8) -0.0047(8)
C10 0.0608(14) 0.0358(11) 0.0451(12) -0.0027(9) 0.0282(11) -0.0140(10)
C11 0.0672(17) 0.0725(18) 0.0516(14) 0.0163(13) 0.0286(13) -0.0044(14)
C12 0.0602(16) 0.0653(17) 0.0703(17) 0.0063(14) 0.0305(14) -0.0124(13)
C13 0.0552(13) 0.0318(10) 0.0336(10) 0.0017(8) 0.0207(9) -0.0060(9)
C14 0.087(2) 0.0521(16) 0.105(2) 0.0017(16) 0.066(2) -0.0122(15)
C15 0.083(2) 0.0486(16) 0.113(3) 0.0364(18) 0.023(2) 0.0080(15)
C16 0.0262(8) 0.0279(8) 0.0238(8) -0.0052(6) 0.0097(7) 0.0039(7)
C17 0.0292(9) 0.0327(9) 0.0289(9) -0.0035(7) 0.0116(7) -0.0002(7)
C18 0.0325(10) 0.0433(11) 0.0377(10) -0.0060(9) 0.0106(8) -0.0069(8)
C19 0.0328(10) 0.0517(13) 0.0306(10) -0.0075(9) 0.0036(8) 0.0000(9)
C20 0.0377(10) 0.0440(11) 0.0256(9) -0.0003(8) 0.0107(8) 0.0083(9)
C21 0.0310(9) 0.0328(9) 0.0273(8) -0.0018(7) 0.0131(7) 0.0056(7)
C22 0.0337(10) 0.0403(11) 0.0335(9) 0.0008(8) 0.0138(8) -0.0061(8)
C23 0.0765(18) 0.0752(18) 0.0519(14) 0.0079(13) 0.0425(14) 0.0107(15)
C24 0.0568(14) 0.0431(12) 0.0523(13) 0.0049(10) 0.0204(11) -0.0082(11)
C25 0.0394(11) 0.0461(12) 0.0320(10) 0.0081(8) 0.0132(8) -0.0020(9)
C26 0.088(2) 0.0368(12) 0.0572(15) 0.0041(11) 0.0340(15) -0.0065(12)
C27 0.0570(15) 0.084(2) 0.0485(13) 0.0127(13) 0.0311(12) -0.0034(14)
C28 0.0396(12) 0.0547(14) 0.0753(17) -0.0077(13) 0.0264(12) 0.0089(10)
C29 0.0440(16) 0.078(2) 0.152(4) -0.047(2) -0.0032(19) -0.0099(15)
C30 0.096(2) 0.085(2) 0.0343(12) -0.0024(13) 0.0113(13) 0.0397(18)
C31 0.077(2) 0.0321(13) 0.127(3) -0.0062(15) 0.039(2) -0.0033(13)
C32 0.126(3) 0.109(3) 0.095(2) -0.011(2) 0.078(3) 0.032(2)
C33 0.0361(13) 0.0499(15) 0.126(3) -0.0201(16) 0.0149(15) 0.0056(11)
C34 0.0691(16) 0.0432(12) 0.0570(14) 0.0046(10) 0.0445(13) 0.0055(11)
C35 0.0531(14) 0.0370(11) 0.0678(15) 0.0052(11) 0.0309(12) 0.0136(10)
C36 0.0629(15) 0.0494(13) 0.0370(11) -0.0141(10) 0.0137(11) 0.0008(11)
 
_geom_special_details
;
 All esds (except the esd in the dihedral angle between two l.s. planes)
 are estimated using the full covariance matrix.  The cell esds are taken
 into account individually in the estimation of esds in distances, angles
 and torsion angles; correlations between esds in cell parameters are only
 used when they are defined by crystal symmetry.  An approximate (isotropic)
 treatment of cell esds is used for estimating esds involving l.s. planes.
;
 
loop_
 _geom_bond_atom_site_label_1
 _geom_bond_atom_site_label_2
 _geom_bond_distance
 _geom_bond_site_symmetry_2
 _geom_bond_publ_flag
Ca N3 2.3066(15) . ?
Ca N3 2.3066(15) 2 ?
Ca N4 2.328(2) . ?
Ca Si1 3.3542(6) . ?
Ca Si1 3.3542(6) 2 ?
Ca Si3 3.4425(7) . ?
Ca Si3 3.4425(7) 2 ?
Ca Si2 3.4781(7) . ?
Ca Si2 3.4781(7) 2 ?
K C1 2.8720(17) 7 ?
K C1 2.8720(17) . ?
K C4 3.1302(19) 7 ?
K C4 3.1302(19) . ?
K C9 3.2900(19) 7 ?
K C9 3.2900(19) . ?
K C5 3.437(2) 7 ?
K C5 3.437(2) . ?
K N1 3.4512(15) 7 ?
K N1 3.4512(15) . ?
Si1 N3 1.6806(16) . ?
Si1 C29 1.875(3) . ?
Si1 C28 1.887(2) . ?
Si1 C30 1.891(3) . ?
Si2 N3 1.6818(16) . ?
Si2 C32 1.868(3) . ?
Si2 C31 1.873(3) . ?
Si2 C33 1.875(3) . ?
Si3 N4 1.6858(10) . ?
Si3 C34 1.878(2) . ?
Si3 C35 1.879(2) . ?
Si3 C36 1.886(2) . ?
N1 C1 1.367(2) . ?
N1 C3 1.382(2) . ?
N1 C4 1.446(2) . ?
N2 C1 1.361(2) . ?
N2 C2 1.390(2) . ?
N2 C16 1.445(2) . ?
N4 Si3 1.6858(10) 2 ?
C2 C3 1.345(3) . ?
C2 H2 0.9500 . ?
C3 H3 0.9500 . ?
C4 C5 1.397(3) . ?
C4 C9 1.401(3) . ?
C5 C6 1.396(3) . ?
C5 C10 1.523(3) . ?
C6 C7 1.379(4) . ?
C6 H6 0.9500 . ?
C7 C8 1.383(3) . ?
C7 H7 0.9500 . ?
C8 C9 1.393(3) . ?
C8 H8 0.9500 . ?
C9 C13 1.521(3) . ?
C10 C11 1.524(4) . ?
C10 C12 1.530(3) . ?
C10 H10 1.0000 . ?
C11 H11A 0.9800 . ?
C11 H11B 0.9800 . ?
C11 H11C 0.9800 . ?
C12 H12A 0.9800 . ?
C12 H12B 0.9800 . ?
C12 H12C 0.9800 . ?
C13 C15 1.518(4) . ?
C13 C14 1.519(4) . ?
C13 H13 1.0000 . ?
C14 H14A 0.9800 . ?
C14 H14B 0.9800 . ?
C14 H14C 0.9800 . ?
C15 H15A 0.9800 . ?
C15 H15B 0.9800 . ?
C15 H15C 0.9800 . ?
C16 C17 1.396(3) . ?
C16 C21 1.400(2) . ?
C17 C18 1.398(3) . ?
C17 C22 1.521(3) . ?
C18 C19 1.382(3) . ?
C18 H18 0.9500 . ?
C19 C20 1.379(3) . ?
C19 H19 0.9500 . ?
C20 C21 1.395(3) . ?
C20 H20 0.9500 . ?
C21 C25 1.518(3) . ?
C22 C23 1.525(3) . ?
C22 C24 1.526(3) . ?
C22 H22 1.0000 . ?
C23 H23A 0.9800 . ?
C23 H23B 0.9800 . ?
C23 H23C 0.9800 . ?
C24 H24A 0.9800 . ?
C24 H24B 0.9800 . ?
C24 H24C 0.9800 . ?
C25 C26 1.525(3) . ?
C25 C27 1.528(3) . ?
C25 H25 1.0000 . ?
C26 H26A 0.9800 . ?
C26 H26B 0.9800 . ?
C26 H26C 0.9800 . ?
C27 H27A 0.9800 . ?
C27 H27B 0.9800 . ?
C27 H27C 0.9800 . ?
C28 H28A 0.9800 . ?
C28 H28B 0.9800 . ?
C28 H28C 0.9800 . ?
C29 H29A 0.9800 . ?
C29 H29B 0.9800 . ?
C29 H29C 0.9800 . ?
C30 H30A 0.9800 . ?
C30 H30B 0.9800 . ?
C30 H30C 0.9800 . ?
C31 H31A 0.9800 . ?
C31 H31B 0.9800 . ?
C31 H31C 0.9800 . ?
C32 H32A 0.9800 . ?
C32 H32B 0.9800 . ?
C32 H32C 0.9800 . ?
C33 H33A 0.9800 . ?
C33 H33B 0.9800 . ?
C33 H33C 0.9800 . ?
C34 H34A 0.9800 . ?
C34 H34B 0.9800 . ?
C34 H34C 0.9800 . ?
C35 H35A 0.9800 . ?
C35 H35B 0.9800 . ?
C35 H35C 0.9800 . ?
C36 H36A 0.9800 . ?
C36 H36B 0.9800 . ?
C36 H36C 0.9800 . ?
 
loop_
 _geom_angle_atom_site_label_1
 _geom_angle_atom_site_label_2
 _geom_angle_atom_site_label_3
 _geom_angle
 _geom_angle_site_symmetry_1
 _geom_angle_site_symmetry_3
 _geom_angle_publ_flag
N3 Ca N3 115.94(8) . 2 ?
N3 Ca N4 122.03(4) . . ?
N3 Ca N4 122.03(4) 2 . ?
N3 Ca Si1 27.33(4) . . ?
N3 Ca Si1 130.21(4) 2 . ?
N4 Ca Si1 103.233(15) . . ?
N3 Ca Si1 130.21(4) . 2 ?
N3 Ca Si1 27.33(4) 2 2 ?
N4 Ca Si1 103.233(15) . 2 ?
Si1 Ca Si1 153.53(3) . 2 ?
N3 Ca Si3 140.03(4) . . ?
N3 Ca Si3 100.87(4) 2 . ?
N4 Ca Si3 25.818(10) . . ?
Si1 Ca Si3 114.641(17) . . ?
Si1 Ca Si3 89.724(17) 2 . ?
N3 Ca Si3 100.87(4) . 2 ?
N3 Ca Si3 140.03(4) 2 2 ?
N4 Ca Si3 25.818(10) . 2 ?
Si1 Ca Si3 89.724(17) . 2 ?
Si1 Ca Si3 114.641(17) 2 2 ?
Si3 Ca Si3 51.635(19) . 2 ?
N3 Ca Si2 24.60(4) . . ?
N3 Ca Si2 99.41(4) 2 . ?
N4 Ca Si2 134.668(12) . . ?
Si1 Ca Si2 51.924(15) . . ?
Si1 Ca Si2 107.15(2) 2 . ?
Si3 Ca Si2 159.472(16) . . ?
Si3 Ca Si2 109.217(14) 2 . ?
N3 Ca Si2 99.41(4) . 2 ?
N3 Ca Si2 24.60(4) 2 2 ?
N4 Ca Si2 134.668(12) . 2 ?
Si1 Ca Si2 107.15(2) . 2 ?
Si1 Ca Si2 51.924(15) 2 2 ?
Si3 Ca Si2 109.217(14) . 2 ?
Si3 Ca Si2 159.473(16) 2 2 ?
Si2 Ca Si2 90.66(2) . 2 ?
C1 K C1 180.00(6) 7 . ?
C1 K C4 47.45(5) 7 7 ?
C1 K C4 132.55(5) . 7 ?
C1 K C4 132.55(5) 7 . ?
C1 K C4 47.45(5) . . ?
C4 K C4 180.00(7) 7 . ?
C1 K C9 62.35(5) 7 7 ?
C1 K C9 117.65(5) . 7 ?
C4 K C9 25.06(5) 7 7 ?
C4 K C9 154.94(5) . 7 ?
C1 K C9 117.65(5) 7 . ?
C1 K C9 62.35(5) . . ?
C4 K C9 154.94(5) 7 . ?
C4 K C9 25.06(5) . . ?
C9 K C9 180.00(7) 7 . ?
C1 K C5 61.70(5) 7 7 ?
C1 K C5 118.30(5) . 7 ?
C4 K C5 23.99(5) 7 7 ?
C4 K C5 156.01(5) . 7 ?
C9 K C5 42.77(5) 7 7 ?
C9 K C5 137.23(5) . 7 ?
C1 K C5 118.30(5) 7 . ?
C1 K C5 61.70(5) . . ?
C4 K C5 156.01(5) 7 . ?
C4 K C5 23.99(5) . . ?
C9 K C5 137.23(5) 7 . ?
C9 K C5 42.77(5) . . ?
C5 K C5 180.00(4) 7 . ?
C1 K N1 22.67(4) 7 7 ?
C1 K N1 157.33(4) . 7 ?
C4 K N1 24.78(4) 7 7 ?
C4 K N1 155.22(4) . 7 ?
C9 K N1 42.47(4) 7 7 ?
C9 K N1 137.53(4) . 7 ?
C5 K N1 41.58(4) 7 7 ?
C5 K N1 138.42(4) . 7 ?
C1 K N1 157.33(4) 7 . ?
C1 K N1 22.67(4) . . ?
C4 K N1 155.22(4) 7 . ?
C4 K N1 24.78(4) . . ?
C9 K N1 137.53(4) 7 . ?
C9 K N1 42.47(4) . . ?
C5 K N1 138.42(4) 7 . ?
C5 K N1 41.58(4) . . ?
N1 K N1 180.00(5) 7 . ?
N3 Si1 C29 114.42(14) . . ?
N3 Si1 C28 109.50(10) . . ?
C29 Si1 C28 106.18(17) . . ?
N3 Si1 C30 112.97(13) . . ?
C29 Si1 C30 106.6(2) . . ?
C28 Si1 C30 106.71(13) . . ?
N3 Si1 Ca 39.06(5) . . ?
C29 Si1 Ca 133.99(16) . . ?
C28 Si1 Ca 71.18(8) . . ?
C30 Si1 Ca 118.34(11) . . ?
N3 Si2 C32 115.13(14) . . ?
N3 Si2 C31 113.43(13) . . ?
C32 Si2 C31 104.9(2) . . ?
N3 Si2 C33 109.30(11) . . ?
C32 Si2 C33 106.5(2) . . ?
C31 Si2 C33 107.06(15) . . ?
N3 Si2 Ca 34.81(5) . . ?
C32 Si2 Ca 136.54(13) . . ?
C31 Si2 Ca 115.98(13) . . ?
C33 Si2 Ca 75.90(10) . . ?
N4 Si3 C34 109.46(10) . . ?
N4 Si3 C35 115.19(10) . . ?
C34 Si3 C35 106.08(11) . . ?
N4 Si3 C36 113.41(9) . . ?
C34 Si3 C36 107.39(12) . . ?
C35 Si3 C36 104.78(12) . . ?
N4 Si3 Ca 36.97(6) . . ?
C34 Si3 Ca 74.89(7) . . ?
C35 Si3 Ca 139.80(9) . . ?
C36 Si3 Ca 113.31(8) . . ?
C1 N1 C3 112.95(14) . . ?
C1 N1 C4 119.20(15) . . ?
C3 N1 C4 127.84(15) . . ?
C1 N1 K 54.11(9) . . ?
C3 N1 K 167.04(11) . . ?
C4 N1 K 65.09(9) . . ?
C1 N2 C2 112.53(14) . . ?
C1 N2 C16 122.80(14) . . ?
C2 N2 C16 124.60(14) . . ?
Si1 N3 Si2 125.79(9) . . ?
Si1 N3 Ca 113.62(8) . . ?
Si2 N3 Ca 120.59(8) . . ?
Si3 N4 Si3 125.58(13) . 2 ?
Si3 N4 Ca 117.21(6) . . ?
Si3 N4 Ca 117.21(6) 2 . ?
N2 C1 N1 102.02(14) . . ?
N2 C1 K 154.76(12) . . ?
N1 C1 K 103.22(10) . . ?
C3 C2 N2 106.41(15) . . ?
C3 C2 H2 126.8 . . ?
N2 C2 H2 126.8 . . ?
C2 C3 N1 106.10(15) . . ?
C2 C3 H3 127.0 . . ?
N1 C3 H3 127.0 . . ?
C5 C4 C9 122.71(17) . . ?
C5 C4 N1 118.55(16) . . ?
C9 C4 N1 118.41(16) . . ?
C5 C4 K 90.39(13) . . ?
C9 C4 K 83.86(12) . . ?
N1 C4 K 90.13(10) . . ?
C6 C5 C4 117.28(19) . . ?
C6 C5 C10 119.60(19) . . ?
C4 C5 C10 123.12(18) . . ?
C6 C5 K 91.91(16) . . ?
C4 C5 K 65.62(11) . . ?
C10 C5 K 111.74(14) . . ?
C7 C6 C5 121.3(2) . . ?
C7 C6 H6 119.4 . . ?
C5 C6 H6 119.4 . . ?
C6 C7 C8 120.1(2) . . ?
C6 C7 H7 119.9 . . ?
C8 C7 H7 119.9 . . ?
C7 C8 C9 121.2(2) . . ?
C7 C8 H8 119.4 . . ?
C9 C8 H8 119.4 . . ?
C8 C9 C4 117.30(18) . . ?
C8 C9 C13 120.60(18) . . ?
C4 C9 C13 122.09(17) . . ?
C8 C9 K 92.58(14) . . ?
C4 C9 K 71.08(11) . . ?
C13 C9 K 106.71(12) . . ?
C5 C10 C11 111.0(2) . . ?
C5 C10 C12 110.6(2) . . ?
C11 C10 C12 110.3(2) . . ?
C5 C10 H10 108.3 . . ?
C11 C10 H10 108.3 . . ?
C12 C10 H10 108.3 . . ?
C10 C11 H11A 109.5 . . ?
C10 C11 H11B 109.5 . . ?
H11A C11 H11B 109.5 . . ?
C10 C11 H11C 109.5 . . ?
H11A C11 H11C 109.5 . . ?
H11B C11 H11C 109.5 . . ?
C10 C12 H12A 109.5 . . ?
C10 C12 H12B 109.5 . . ?
H12A C12 H12B 109.5 . . ?
C10 C12 H12C 109.5 . . ?
H12A C12 H12C 109.5 . . ?
H12B C12 H12C 109.5 . . ?
C15 C13 C14 110.1(2) . . ?
C15 C13 C9 109.4(2) . . ?
C14 C13 C9 112.7(2) . . ?
C15 C13 H13 108.2 . . ?
C14 C13 H13 108.2 . . ?
C9 C13 H13 108.2 . . ?
C13 C14 H14A 109.5 . . ?
C13 C14 H14B 109.5 . . ?
H14A C14 H14B 109.5 . . ?
C13 C14 H14C 109.5 . . ?
H14A C14 H14C 109.5 . . ?
H14B C14 H14C 109.5 . . ?
C13 C15 H15A 109.5 . . ?
C13 C15 H15B 109.5 . . ?
H15A C15 H15B 109.5 . . ?
C13 C15 H15C 109.5 . . ?
H15A C15 H15C 109.5 . . ?
H15B C15 H15C 109.5 . . ?
C17 C16 C21 122.87(16) . . ?
C17 C16 N2 118.30(15) . . ?
C21 C16 N2 118.82(16) . . ?
C16 C17 C18 117.30(17) . . ?
C16 C17 C22 122.07(16) . . ?
C18 C17 C22 120.59(18) . . ?
C19 C18 C17 121.0(2) . . ?
C19 C18 H18 119.5 . . ?
C17 C18 H18 119.5 . . ?
C20 C19 C18 120.42(18) . . ?
C20 C19 H19 119.8 . . ?
C18 C19 H19 119.8 . . ?
C19 C20 C21 121.05(18) . . ?
C19 C20 H20 119.5 . . ?
C21 C20 H20 119.5 . . ?
C20 C21 C16 117.35(18) . . ?
C20 C21 C25 120.93(17) . . ?
C16 C21 C25 121.66(16) . . ?
C17 C22 C23 110.54(18) . . ?
C17 C22 C24 112.22(17) . . ?
C23 C22 C24 111.4(2) . . ?
C17 C22 H22 107.5 . . ?
C23 C22 H22 107.5 . . ?
C24 C22 H22 107.5 . . ?
C22 C23 H23A 109.5 . . ?
C22 C23 H23B 109.5 . . ?
H23A C23 H23B 109.5 . . ?
C22 C23 H23C 109.5 . . ?
H23A C23 H23C 109.5 . . ?
H23B C23 H23C 109.5 . . ?
C22 C24 H24A 109.5 . . ?
C22 C24 H24B 109.5 . . ?
H24A C24 H24B 109.5 . . ?
C22 C24 H24C 109.5 . . ?
H24A C24 H24C 109.5 . . ?
H24B C24 H24C 109.5 . . ?
C21 C25 C26 109.92(19) . . ?
C21 C25 C27 113.39(19) . . ?
C26 C25 C27 110.4(2) . . ?
C21 C25 H25 107.6 . . ?
C26 C25 H25 107.6 . . ?
C27 C25 H25 107.6 . . ?
C25 C26 H26A 109.5 . . ?
C25 C26 H26B 109.5 . . ?
H26A C26 H26B 109.5 . . ?
C25 C26 H26C 109.5 . . ?
H26A C26 H26C 109.5 . . ?
H26B C26 H26C 109.5 . . ?
C25 C27 H27A 109.5 . . ?
C25 C27 H27B 109.5 . . ?
H27A C27 H27B 109.5 . . ?
C25 C27 H27C 109.5 . . ?
H27A C27 H27C 109.5 . . ?
H27B C27 H27C 109.5 . . ?
Si1 C28 H28A 109.5 . . ?
Si1 C28 H28B 109.5 . . ?
H28A C28 H28B 109.5 . . ?
Si1 C28 H28C 109.5 . . ?
H28A C28 H28C 109.5 . . ?
H28B C28 H28C 109.5 . . ?
Si1 C29 H29A 109.5 . . ?
Si1 C29 H29B 109.5 . . ?
H29A C29 H29B 109.5 . . ?
Si1 C29 H29C 109.5 . . ?
H29A C29 H29C 109.5 . . ?
H29B C29 H29C 109.5 . . ?
Si1 C30 H30A 109.5 . . ?
Si1 C30 H30B 109.5 . . ?
H30A C30 H30B 109.5 . . ?
Si1 C30 H30C 109.5 . . ?
H30A C30 H30C 109.5 . . ?
H30B C30 H30C 109.5 . . ?
Si2 C31 H31A 109.5 . . ?
Si2 C31 H31B 109.5 . . ?
H31A C31 H31B 109.5 . . ?
Si2 C31 H31C 109.5 . . ?
H31A C31 H31C 109.5 . . ?
H31B C31 H31C 109.5 . . ?
Si2 C32 H32A 109.5 . . ?
Si2 C32 H32B 109.5 . . ?
H32A C32 H32B 109.5 . . ?
Si2 C32 H32C 109.5 . . ?
H32A C32 H32C 109.5 . . ?
H32B C32 H32C 109.5 . . ?
Si2 C33 H33A 109.5 . . ?
Si2 C33 H33B 109.5 . . ?
H33A C33 H33B 109.5 . . ?
Si2 C33 H33C 109.5 . . ?
H33A C33 H33C 109.5 . . ?
H33B C33 H33C 109.5 . . ?
Si3 C34 H34A 109.5 . . ?
Si3 C34 H34B 109.5 . . ?
H34A C34 H34B 109.5 . . ?
Si3 C34 H34C 109.5 . . ?
H34A C34 H34C 109.5 . . ?
H34B C34 H34C 109.5 . . ?
Si3 C35 H35A 109.5 . . ?
Si3 C35 H35B 109.5 . . ?
H35A C35 H35B 109.5 . . ?
Si3 C35 H35C 109.5 . . ?
H35A C35 H35C 109.5 . . ?
H35B C35 H35C 109.5 . . ?
Si3 C36 H36A 109.5 . . ?
Si3 C36 H36B 109.5 . . ?
H36A C36 H36B 109.5 . . ?
Si3 C36 H36C 109.5 . . ?
H36A C36 H36C 109.5 . . ?
H36B C36 H36C 109.5 . . ?
 
_diffrn_measured_fraction_theta_max    0.991
_diffrn_reflns_theta_full              27.47
_diffrn_measured_fraction_theta_full   0.991
_refine_diff_density_max    1.629
_refine_diff_density_min   -1.021
_refine_diff_density_rms    0.049

#=====>END

#======================================================
 
data_compound7
 
_audit_creation_method            SHELXL-97
_chemical_name_systematic
;
 ?
;
_chemical_name_common             ?
_chemical_melting_point           ?
_chemical_formula_moiety          
'4(C54 H72 N4 Na), 4(C18 H54 N3 Si6 Sr), C7 H8 '
_chemical_formula_sum
 'C295 H512 N28 Na4 Si24 Sr4'
_chemical_formula_weight          5567.93
 
loop_
 _atom_type_symbol
 _atom_type_description
 _atom_type_scat_dispersion_real
 _atom_type_scat_dispersion_imag
 _atom_type_scat_source
 'C'  'C'   0.0033   0.0016
 'International Tables Vol C Tables 4.2.6.8 and 6.1.1.4'
 'H'  'H'   0.0000   0.0000
 'International Tables Vol C Tables 4.2.6.8 and 6.1.1.4'
 'N'  'N'   0.0061   0.0033
 'International Tables Vol C Tables 4.2.6.8 and 6.1.1.4'
 'Si'  'Si'   0.0817   0.0704
 'International Tables Vol C Tables 4.2.6.8 and 6.1.1.4'
 'Na'  'Na'   0.0362   0.0249
 'International Tables Vol C Tables 4.2.6.8 and 6.1.1.4'
 'Sr'  'Sr'  -1.5307   3.2498
 'International Tables Vol C Tables 4.2.6.8 and 6.1.1.4'
 
_symmetry_cell_setting            orthorhombic
_symmetry_space_group_name_H-M    'P c c a'
 
loop_
 _symmetry_equiv_pos_as_xyz
 'x, y, z'
 '-x+1/2, -y, z'
 'x+1/2, -y, -z+1/2'
 '-x, y, -z+1/2'
 '-x, -y, -z'
 'x-1/2, y, -z'
 '-x-1/2, y, z-1/2'
 'x, -y, z-1/2'
 
_cell_length_a                    15.9859(2)
_cell_length_b                    29.3812(5)
_cell_length_c                    37.6290(6)
_cell_angle_alpha                 90.00
_cell_angle_beta                  90.00
_cell_angle_gamma                 90.00
_cell_volume                      17673.8(5)
_cell_formula_units_Z             2
_cell_measurement_temperature     150(2)
_cell_measurement_reflns_used     129857
_cell_measurement_theta_min        2.910
_cell_measurement_theta_max        25.028
 
_exptl_crystal_description        block
_exptl_crystal_colour             colourless
_exptl_crystal_size_max           0.40
_exptl_crystal_size_mid           0.20
_exptl_crystal_size_min           0.15
_exptl_crystal_density_meas       ?
_exptl_crystal_density_diffrn     1.046
_exptl_crystal_density_method     'not measured'
_exptl_crystal_F_000              6020
_exptl_absorpt_coefficient_mu     0.735
_exptl_absorpt_correction_type    none
_exptl_absorpt_correction_T_min   ?
_exptl_absorpt_correction_T_max   ?
_exptl_absorpt_process_details    ?

 
_exptl_special_details
;
 ?
;
 
_diffrn_ambient_temperature       150(2)
_diffrn_radiation_wavelength      0.71073
_diffrn_radiation_type            MoK\a
_diffrn_radiation_source          'fine-focus sealed tube'
_diffrn_radiation_monochromator   graphite
_diffrn_measurement_device_type   'Nonius Kappa CCD'
_diffrn_measurement_method        '760 1.0 degree images with \w scans'
_diffrn_standards_number          0
_diffrn_standards_decay_%         0
_diffrn_reflns_number             109357
_diffrn_reflns_av_R_equivalents   0.0974
_diffrn_reflns_av_sigmaI/netI     0.1017
_diffrn_reflns_limit_h_min        -17
_diffrn_reflns_limit_h_max        18
_diffrn_reflns_limit_k_min        -34
_diffrn_reflns_limit_k_max        34
_diffrn_reflns_limit_l_min        -44
_diffrn_reflns_limit_l_max        44
_diffrn_reflns_theta_min          3.85
_diffrn_reflns_theta_max          25.02
_reflns_number_total              15249
_reflns_number_gt                 7376
_reflns_threshold_expression      >2sigma(I)
 
_computing_data_collection        'Collect (Nonius BV, 1997-2000)'
_computing_cell_refinement         'HKL Scalepack (Otwinski & Minor, 1997)'
_computing_data_reduction         
;
 DENZO-SCALEPACK Z. Otwinowski and W. Minor, " 
 Processing of X-ray Diffraction Data Collected in Oscillation Mode ", 
 Methods in Enzymology, Volume 276: Macromolecular Crystallography, 
 part A, p.307-326, 1997,C.W. Carter, Jr. & R. M. Sweet, Eds., Academic Press.
;
_computing_structure_solution     
; 
 SIR97- Altomare A., Burla M.C., Camalli M., Cascarano G.L., Giacovazzo C. , 
 Guagliardi A., Moliterni A.G.G., Polidori G.,Spagna R. 
 (1999) J. Appl. Cryst. 32, 115-119
;
_computing_structure_refinement   
;
 SHELXL97 -Program for Crystal Structure Analysis (Release 97-2). 
 Sheldrick, G.M., Institut f\"ur Anorganische Chemie der Universit\"at, 
 Tammanstrasse 4, D-3400 G\"ottingen, Germany, 1998 
;
_computing_molecular_graphics  

'ORTEP3 for Windows - Farrugia, L. J. J. Appl. Crystallogr. 1997, 30, 565'

_computing_publication_material    
;
 'WinGX publication routines, Farrugia, 
 L. J., J. Appl. Crystallogr., 1999, 32, 837-838
;  
 
_refine_special_details
;
 Refinement of F^2^ against ALL reflections.  The weighted R-factor wR and
 goodness of fit S are based on F^2^, conventional R-factors R are based
 on F, with F set to zero for negative F^2^. The threshold expression of
 F^2^ > 2sigma(F^2^) is used only for calculating R-factors(gt) etc. and is
 not relevant to the choice of reflections for refinement.  R-factors based
 on F^2^ are statistically about twice as large as those based on F, and R-
 factors based on ALL data will be even larger.
;
 
_refine_ls_structure_factor_coef  Fsqd
_refine_ls_matrix_type            full
_refine_ls_weighting_scheme       calc
_refine_ls_weighting_details
 'calc w=1/[\s^2^(Fo^2^)+(0.0612P)^2^+12.8024P] where P=(Fo^2^+2Fc^2^)/3'
_atom_sites_solution_primary      direct
_atom_sites_solution_secondary    difmap
_atom_sites_solution_hydrogens    geom
_refine_ls_hydrogen_treatment     constr
_refine_ls_extinction_method      none
_refine_ls_extinction_coef        ?
_refine_ls_number_reflns          15249
_refine_ls_number_parameters      1069
_refine_ls_number_restraints      8
_refine_ls_R_factor_all           0.1664
_refine_ls_R_factor_gt            0.0647
_refine_ls_wR_factor_ref          0.1664
_refine_ls_wR_factor_gt           0.1304
_refine_ls_goodness_of_fit_ref    1.015
_refine_ls_restrained_S_all       1.015
_refine_ls_shift/su_max           0.000
_refine_ls_shift/su_mean          0.000
 
loop_
 _atom_site_label
 _atom_site_type_symbol
 _atom_site_fract_x
 _atom_site_fract_y
 _atom_site_fract_z
 _atom_site_U_iso_or_equiv
 _atom_site_adp_type
 _atom_site_occupancy
 _atom_site_symmetry_multiplicity
 _atom_site_calc_flag
 _atom_site_refinement_flags
 _atom_site_disorder_assembly
 _atom_site_disorder_group
Na Na 0.29596(13) 0.25102(6) 0.12230(5) 0.0775(6) Uani 1 1 d . . .
Sr1 Sr 0.7500 0.0000 0.133744(16) 0.05291(19) Uani 1 2 d S . .
Sr2 Sr 0.7500 0.5000 0.121152(14) 0.04637(18) Uani 1 2 d S . .
Si1 Si 0.87030(9) 0.09673(5) 0.11571(4) 0.0669(4) Uani 1 1 d . C .
Si2 Si 0.90849(12) 0.01484(7) 0.06978(5) 0.1082(7) Uani 1 1 d . C .
Si3 Si 0.84113(9) -0.01315(4) 0.21838(4) 0.0676(4) Uani 1 1 d . . .
Si4 Si 0.87434(10) 0.44743(5) 0.18613(4) 0.0748(5) Uani 1 1 d . . .
Si5 Si 0.77469(9) 0.38273(4) 0.14038(4) 0.0668(4) Uani 1 1 d . . .
Si6 Si 0.84493(9) 0.49417(5) 0.03793(4) 0.0708(4) Uani 1 1 d . . .
N1 N 0.33139(19) 0.20008(12) 0.03717(9) 0.0455(9) Uani 1 1 d . . .
N2 N 0.39775(19) 0.16789(11) 0.07902(9) 0.0405(8) Uani 1 1 d . . .
N3 N 0.1838(2) 0.28987(17) 0.19782(11) 0.0596(11) Uani 1 1 d . . .
N4 N 0.2356(2) 0.3442(2) 0.16798(11) 0.0733(13) Uani 1 1 d . . .
N5 N 0.8561(2) 0.04386(12) 0.10100(10) 0.0635(11) Uani 1 1 d . . .
N6 N 0.7500 0.0000 0.19913(13) 0.0505(13) Uani 1 2 d S . .
N7 N 0.8083(2) 0.43408(11) 0.15319(9) 0.0512(9) Uani 1 1 d . . .
N8 N 0.7500 0.5000 0.05591(12) 0.0526(13) Uani 1 2 d S . .
C1 C 0.3460(2) 0.20400(14) 0.07284(11) 0.0410(10) Uani 1 1 d . . .
C2 C 0.3722(3) 0.16328(17) 0.02257(12) 0.0578(13) Uani 1 1 d . . .
H2 H 0.3705 0.1541 -0.0016 0.069 Uiso 1 1 calc R . .
C3 C 0.4147(3) 0.14270(15) 0.04878(12) 0.0519(12) Uani 1 1 d . . .
H3 H 0.4491 0.1164 0.0470 0.062 Uiso 1 1 calc R . .
C4 C 0.2766(3) 0.22970(17) 0.01727(11) 0.0536(12) Uani 1 1 d . A .
C5 C 0.1931(3) 0.21710(17) 0.01390(11) 0.0557(13) Uani 1 1 d . . .
C6 C 0.1424(3) 0.2469(2) -0.00535(14) 0.0684(15) Uani 1 1 d . . .
H6 H 0.0850 0.2396 -0.0086 0.082 Uiso 1 1 calc R . .
C7 C 0.1725(4) 0.2864(2) -0.01974(14) 0.0794(16) Uani 1 1 d . . .
H7 H 0.1359 0.3064 -0.0321 0.095 Uiso 1 1 calc R . .
C8 C 0.2553(3) 0.2972(2) -0.01640(14) 0.0865(18) Uani 1 1 d . A .
H8 H 0.2761 0.3243 -0.0270 0.104 Uiso 1 1 calc R . .
C9 C 0.3095(3) 0.26893(19) 0.00234(14) 0.0741(16) Uani 1 1 d . . .
C10 C 0.1595(3) 0.17410(18) 0.03004(14) 0.0673(14) Uani 1 1 d . . .
H10 H 0.2068 0.1592 0.0430 0.081 Uiso 1 1 calc R . .
C11 C 0.1284(5) 0.1403(2) 0.00192(18) 0.142(3) Uani 1 1 d . . .
H11A H 0.0842 0.1545 -0.0123 0.213 Uiso 1 1 calc R . .
H11B H 0.1061 0.1131 0.0137 0.213 Uiso 1 1 calc R . .
H11C H 0.1750 0.1316 -0.0136 0.213 Uiso 1 1 calc R . .
C12 C 0.0916(5) 0.1833(2) 0.0568(2) 0.172(4) Uani 1 1 d . . .
H12A H 0.1112 0.2058 0.0741 0.257 Uiso 1 1 calc R . .
H12B H 0.0773 0.1549 0.0691 0.257 Uiso 1 1 calc R . .
H12C H 0.0419 0.1950 0.0446 0.257 Uiso 1 1 calc R . .
C13 C 0.4020(6) 0.2860(6) 0.0098(5) 0.068(5) Uani 0.69(3) 1 d PD A 1
H13 H 0.4346 0.2592 0.0186 0.081 Uiso 0.69(3) 1 calc PR A 1
C14 C 0.4425(6) 0.3014(7) -0.0247(5) 0.113(8) Uani 0.69(3) 1 d PD A 1
H14A H 0.4405 0.2765 -0.0421 0.170 Uiso 0.69(3) 1 calc PR A 1
H14B H 0.5009 0.3097 -0.0202 0.170 Uiso 0.69(3) 1 calc PR A 1
H14C H 0.4123 0.3278 -0.0341 0.170 Uiso 0.69(3) 1 calc PR A 1
C15 C 0.4089(8) 0.3230(6) 0.0378(5) 0.099(6) Uani 0.69(3) 1 d P A 1
H15A H 0.3808 0.3506 0.0293 0.149 Uiso 0.69(3) 1 calc PR A 1
H15B H 0.4680 0.3297 0.0423 0.149 Uiso 0.69(3) 1 calc PR A 1
H15C H 0.3823 0.3126 0.0598 0.149 Uiso 0.69(3) 1 calc PR A 1
C13A C 0.4018(12) 0.2676(8) -0.0044(6) 0.039(6) Uiso 0.31(3) 1 d P A 2
H13A H 0.4266 0.2406 0.0079 0.047 Uiso 0.31(3) 1 calc PR A 2
C14A C 0.4334(17) 0.2696(13) -0.0417(6) 0.085(8) Uani 0.31(3) 1 d P A 2
H14D H 0.4058 0.2947 -0.0543 0.128 Uiso 0.31(3) 1 calc PR A 2
H14E H 0.4212 0.2408 -0.0538 0.128 Uiso 0.31(3) 1 calc PR A 2
H14F H 0.4940 0.2747 -0.0415 0.128 Uiso 0.31(3) 1 calc PR A 2
C15A C 0.422(2) 0.3109(12) 0.0168(13) 0.114(16) Uani 0.31(3) 1 d P A 2
H15D H 0.4830 0.3136 0.0195 0.170 Uiso 0.31(3) 1 calc PR A 2
H15E H 0.3961 0.3090 0.0403 0.170 Uiso 0.31(3) 1 calc PR A 2
H15F H 0.4007 0.3375 0.0041 0.170 Uiso 0.31(3) 1 calc PR A 2
C16 C 0.4302(3) 0.15706(14) 0.11384(11) 0.0452(11) Uani 1 1 d . . .
C17 C 0.5071(3) 0.17515(14) 0.12405(12) 0.0495(11) Uani 1 1 d . . .
C18 C 0.5368(3) 0.16322(17) 0.15752(13) 0.0660(14) Uani 1 1 d . . .
H18 H 0.5889 0.1750 0.1655 0.079 Uiso 1 1 calc R . .
C19 C 0.4920(4) 0.13477(18) 0.17926(14) 0.0730(15) Uani 1 1 d . . .
H19 H 0.5139 0.1267 0.2018 0.088 Uiso 1 1 calc R . .
C20 C 0.4156(3) 0.11783(16) 0.16878(13) 0.0655(14) Uani 1 1 d . . .
H20 H 0.3850 0.0987 0.1844 0.079 Uiso 1 1 calc R . .
C21 C 0.3827(3) 0.12832(14) 0.13570(12) 0.0514(12) Uani 1 1 d . . .
C22 C 0.5564(3) 0.20676(17) 0.10013(13) 0.0660(14) Uani 1 1 d . . .
H22 H 0.5322 0.2044 0.0757 0.079 Uiso 1 1 calc R . .
C23 C 0.5451(4) 0.25623(18) 0.11280(17) 0.102(2) Uani 1 1 d . . .
H23A H 0.4857 0.2644 0.1119 0.153 Uiso 1 1 calc R . .
H23B H 0.5770 0.2767 0.0973 0.153 Uiso 1 1 calc R . .
H23C H 0.5654 0.2591 0.1373 0.153 Uiso 1 1 calc R . .
C24 C 0.6491(3) 0.1939(2) 0.09773(16) 0.100(2) Uani 1 1 d . . .
H24A H 0.6758 0.1987 0.1209 0.151 Uiso 1 1 calc R . .
H24B H 0.6766 0.2129 0.0798 0.151 Uiso 1 1 calc R . .
H24C H 0.6542 0.1618 0.0910 0.151 Uiso 1 1 calc R . .
C25 C 0.2984(3) 0.10937(16) 0.12442(13) 0.0672(14) Uani 1 1 d . . .
H25 H 0.2887 0.1186 0.0992 0.081 Uiso 1 1 calc R . .
C26 C 0.2958(5) 0.0586(2) 0.1260(2) 0.174(4) Uani 1 1 d . . .
H26A H 0.3377 0.0459 0.1098 0.261 Uiso 1 1 calc R . .
H26B H 0.2401 0.0479 0.1190 0.261 Uiso 1 1 calc R . .
H26C H 0.3078 0.0485 0.1503 0.261 Uiso 1 1 calc R . .
C27 C 0.2284(4) 0.1300(3) 0.1468(2) 0.141(3) Uani 1 1 d . . .
H27A H 0.1748 0.1163 0.1400 0.212 Uiso 1 1 calc R . .
H27B H 0.2263 0.1629 0.1429 0.212 Uiso 1 1 calc R . .
H27C H 0.2392 0.1239 0.1720 0.212 Uiso 1 1 calc R . .
C28 C 0.2324(3) 0.2981(3) 0.16836(14) 0.0791(18) Uani 1 1 d . B .
C29 C 0.1593(3) 0.33005(17) 0.21431(12) 0.0592(13) Uani 1 1 d . B .
H29 H 0.1258 0.3328 0.2351 0.071 Uiso 1 1 calc R . .
C30 C 0.1921(3) 0.36407(19) 0.19532(13) 0.0612(13) Uani 1 1 d . B .
H30 H 0.1864 0.3957 0.1998 0.073 Uiso 1 1 calc R . .
C31 C 0.1702(13) 0.2498(6) 0.2074(6) 0.040(4) Uani 0.593(11) 1 d P B 1
C32 C 0.2302(16) 0.2266(8) 0.2286(7) 0.069(7) Uani 0.593(11) 1 d P B 1
C33 C 0.2045(18) 0.1838(9) 0.2367(7) 0.098(10) Uani 0.593(11) 1 d P B 1
H33 H 0.2436 0.1663 0.2500 0.117 Uiso 0.593(11) 1 calc PR B 1
C34 C 0.1361(15) 0.1632(6) 0.2293(8) 0.087(10) Uani 0.593(11) 1 d P B 1
H34 H 0.1265 0.1329 0.2371 0.104 Uiso 0.593(11) 1 calc PR B 1
C35 C 0.0734(17) 0.1877(13) 0.2087(9) 0.077(8) Uani 0.593(11) 1 d P B 1
H35 H 0.0218 0.1738 0.2025 0.092 Uiso 0.593(11) 1 calc PR B 1
C36 C 0.0917(14) 0.2325(4) 0.1981(4) 0.055(5) Uani 0.593(11) 1 d P B 1
C37 C 0.3085(12) 0.2483(6) 0.2410(5) 0.077(5) Uani 0.593(11) 1 d P B 1
H37 H 0.3008 0.2820 0.2397 0.092 Uiso 0.593(11) 1 calc PR B 1
C38 C 0.3818(9) 0.2350(7) 0.2149(4) 0.139(7) Uani 0.593(11) 1 d P B 1
H38A H 0.3847 0.2018 0.2128 0.208 Uiso 0.593(11) 1 calc PR B 1
H38B H 0.4349 0.2465 0.2243 0.208 Uiso 0.593(11) 1 calc PR B 1
H38C H 0.3713 0.2483 0.1915 0.208 Uiso 0.593(11) 1 calc PR B 1
C39 C 0.3316(14) 0.2364(7) 0.2788(5) 0.113(7) Uani 0.593(11) 1 d P B 1
H39A H 0.2821 0.2392 0.2941 0.170 Uiso 0.593(11) 1 calc PR B 1
H39B H 0.3753 0.2571 0.2872 0.170 Uiso 0.593(11) 1 calc PR B 1
H39C H 0.3523 0.2050 0.2797 0.170 Uiso 0.593(11) 1 calc PR B 1
C40 C 0.0258(11) 0.2608(6) 0.1777(5) 0.041(4) Uani 0.593(11) 1 d PD B 1
H40 H 0.0361 0.2941 0.1811 0.049 Uiso 0.593(11) 1 calc PR B 1
C41 C -0.0677(12) 0.2487(6) 0.1868(4) 0.088(5) Uani 0.593(11) 1 d PD B 1
H41A H -0.0791 0.2172 0.1800 0.132 Uiso 0.593(11) 1 calc PR B 1
H41B H -0.1052 0.2691 0.1738 0.132 Uiso 0.593(11) 1 calc PR B 1
H41C H -0.0770 0.2524 0.2124 0.132 Uiso 0.593(11) 1 calc PR B 1
C42 C 0.0379(7) 0.2472(4) 0.1377(3) 0.063(3) Uani 0.593(11) 1 d P B 1
H42A H 0.0914 0.2591 0.1291 0.094 Uiso 0.593(11) 1 calc PR B 1
H42B H -0.0078 0.2599 0.1235 0.094 Uiso 0.593(11) 1 calc PR B 1
H42C H 0.0377 0.2139 0.1355 0.094 Uiso 0.593(11) 1 calc PR B 1
C31A C 0.143(2) 0.2390(10) 0.2130(10) 0.039(7) Uani 0.407(11) 1 d P B 2
C32A C 0.1988(17) 0.2143(10) 0.2337(9) 0.039(6) Uani 0.407(11) 1 d P B 2
C33A C 0.174(3) 0.1709(11) 0.2461(7) 0.057(7) Uani 0.407(11) 1 d P B 2
H33A H 0.2078 0.1538 0.2620 0.069 Uiso 0.407(11) 1 calc PR B 2
C34A C 0.0927(13) 0.1536(8) 0.2331(8) 0.050(5) Uani 0.407(11) 1 d P B 2
H34A H 0.0753 0.1237 0.2392 0.061 Uiso 0.407(11) 1 calc PR B 2
C35A C 0.042(2) 0.1804(16) 0.2122(13) 0.053(7) Uani 0.407(11) 1 d P B 2
H35A H -0.0111 0.1695 0.2047 0.063 Uiso 0.407(11) 1 calc PR B 2
C36A C 0.0681(12) 0.2224(9) 0.2024(6) 0.037(6) Uiso 0.407(11) 1 d PD B 2
C37A C 0.284(2) 0.2293(6) 0.2462(8) 0.058(6) Uani 0.407(11) 1 d P B 2
H37A H 0.2888 0.2626 0.2409 0.069 Uiso 0.407(11) 1 calc PR B 2
C38A C 0.3539(11) 0.2060(7) 0.2277(5) 0.080(5) Uani 0.407(11) 1 d P B 2
H38D H 0.3578 0.1745 0.2361 0.119 Uiso 0.407(11) 1 calc PR B 2
H38E H 0.4063 0.2219 0.2328 0.119 Uiso 0.407(11) 1 calc PR B 2
H38F H 0.3437 0.2062 0.2020 0.119 Uiso 0.407(11) 1 calc PR B 2
C39A C 0.2938(16) 0.2233(10) 0.2872(7) 0.072(6) Uani 0.407(11) 1 d P B 2
H39D H 0.2440 0.2352 0.2992 0.108 Uiso 0.407(11) 1 calc PR B 2
H39E H 0.3433 0.2399 0.2953 0.108 Uiso 0.407(11) 1 calc PR B 2
H39F H 0.3002 0.1909 0.2928 0.108 Uiso 0.407(11) 1 calc PR B 2
C40A C 0.0093(16) 0.2492(8) 0.1774(8) 0.060(9) Uani 0.407(11) 1 d PD B 2
H40A H 0.0430 0.2769 0.1713 0.072 Uiso 0.407(11) 1 calc PR B 2
C41A C -0.0590(16) 0.2683(10) 0.2028(7) 0.120(11) Uani 0.407(11) 1 d PD B 2
H41D H -0.0906 0.2923 0.1907 0.179 Uiso 0.407(11) 1 calc PR B 2
H41E H -0.0324 0.2808 0.2241 0.179 Uiso 0.407(11) 1 calc PR B 2
H41F H -0.0972 0.2437 0.2097 0.179 Uiso 0.407(11) 1 calc PR B 2
C42A C -0.0138(16) 0.2323(7) 0.1437(6) 0.110(8) Uani 0.407(11) 1 d P B 2
H42D H -0.0556 0.2082 0.1466 0.164 Uiso 0.407(11) 1 calc PR B 2
H42E H 0.0356 0.2200 0.1317 0.164 Uiso 0.407(11) 1 calc PR B 2
H42F H -0.0376 0.2570 0.1294 0.164 Uiso 0.407(11) 1 calc PR B 2
C43 C 0.2783(8) 0.3782(4) 0.1410(3) 0.053(3) Uani 0.593(11) 1 d P B 1
C44 C 0.2376(6) 0.3905(4) 0.1104(3) 0.057(3) Uani 0.593(11) 1 d P B 1
C45 C 0.2825(7) 0.4182(5) 0.0867(3) 0.087(4) Uani 0.593(11) 1 d P B 1
H45 H 0.2558 0.4288 0.0657 0.105 Uiso 0.593(11) 1 calc PR B 1
C46 C 0.3647(9) 0.4304(6) 0.0932(4) 0.111(5) Uani 0.593(11) 1 d P B 1
H46 H 0.3947 0.4475 0.0759 0.133 Uiso 0.593(11) 1 calc PR B 1
C47 C 0.4024(9) 0.4183(7) 0.1235(5) 0.106(5) Uani 0.593(11) 1 d P B 1
H47 H 0.4582 0.4281 0.1276 0.127 Uiso 0.593(11) 1 calc PR B 1
C48 C 0.3619(8) 0.3915(6) 0.1500(3) 0.077(4) Uani 0.593(11) 1 d P B 1
C49 C 0.1471(9) 0.3773(6) 0.1030(4) 0.063(4) Uani 0.593(11) 1 d P B 1
H49 H 0.1241 0.3610 0.1242 0.076 Uiso 0.593(11) 1 calc PR B 1
C50 C 0.1511(9) 0.3436(6) 0.0708(5) 0.113(5) Uani 0.593(11) 1 d P B 1
H50A H 0.1858 0.3173 0.0771 0.170 Uiso 0.593(11) 1 calc PR B 1
H50B H 0.1755 0.3591 0.0502 0.170 Uiso 0.593(11) 1 calc PR B 1
H50C H 0.0945 0.3332 0.0649 0.170 Uiso 0.593(11) 1 calc PR B 1
C51 C 0.0929(11) 0.4145(9) 0.0942(6) 0.138(7) Uani 0.593(11) 1 d P B 1
H51A H 0.0361 0.4030 0.0901 0.207 Uiso 0.593(11) 1 calc PR B 1
H51B H 0.1133 0.4295 0.0726 0.207 Uiso 0.593(11) 1 calc PR B 1
H51C H 0.0922 0.4364 0.1139 0.207 Uiso 0.593(11) 1 calc PR B 1
C52 C 0.4028(10) 0.3784(7) 0.1851(5) 0.086(5) Uani 0.593(11) 1 d P B 1
H52 H 0.3714 0.3519 0.1950 0.104 Uiso 0.593(11) 1 calc PR B 1
C53 C 0.4937(7) 0.3638(5) 0.1803(3) 0.111(4) Uani 0.593(11) 1 d P B 1
H53A H 0.4961 0.3365 0.1655 0.166 Uiso 0.593(11) 1 calc PR B 1
H53B H 0.5183 0.3573 0.2036 0.166 Uiso 0.593(11) 1 calc PR B 1
H53C H 0.5251 0.3884 0.1689 0.166 Uiso 0.593(11) 1 calc PR B 1
C54 C 0.3983(13) 0.4175(9) 0.2125(7) 0.135(11) Uani 0.593(11) 1 d P B 1
H54A H 0.3397 0.4263 0.2161 0.202 Uiso 0.593(11) 1 calc PR B 1
H54B H 0.4300 0.4437 0.2037 0.202 Uiso 0.593(11) 1 calc PR B 1
H54C H 0.4222 0.4073 0.2351 0.202 Uiso 0.593(11) 1 calc PR B 1
C43A C 0.2940(12) 0.3542(6) 0.1443(5) 0.050(4) Uani 0.407(11) 1 d P B 2
C44A C 0.2603(12) 0.3628(5) 0.1098(4) 0.060(5) Uani 0.407(11) 1 d P B 2
C45A C 0.3121(17) 0.3816(7) 0.0852(5) 0.103(7) Uani 0.407(11) 1 d P B 2
H45A H 0.2927 0.3899 0.0622 0.123 Uiso 0.407(11) 1 calc PR B 2
C46A C 0.397(2) 0.3882(8) 0.0956(8) 0.155(13) Uani 0.407(11) 1 d P B 2
H46A H 0.4351 0.3984 0.0780 0.185 Uiso 0.407(11) 1 calc PR B 2
C47A C 0.4273(16) 0.3808(10) 0.1300(7) 0.123(9) Uani 0.407(11) 1 d P B 2
H47A H 0.4828 0.3890 0.1365 0.148 Uiso 0.407(11) 1 calc PR B 2
C48A C 0.3744(15) 0.3614(7) 0.1538(6) 0.086(7) Uani 0.407(11) 1 d P B 2
C49A C 0.1726(15) 0.3538(7) 0.0995(5) 0.066(6) Uani 0.407(11) 1 d PD B 2
H49A H 0.1415 0.3482 0.1222 0.079 Uiso 0.407(11) 1 calc PR B 2
C50A C 0.1616(14) 0.3121(7) 0.0777(7) 0.129(9) Uani 0.407(11) 1 d PD B 2
H50D H 0.1025 0.3088 0.0713 0.194 Uiso 0.407(11) 1 calc PR B 2
H50E H 0.1796 0.2855 0.0914 0.194 Uiso 0.407(11) 1 calc PR B 2
H50F H 0.1954 0.3146 0.0561 0.194 Uiso 0.407(11) 1 calc PR B 2
C51A C 0.127(2) 0.3928(9) 0.0810(14) 0.22(3) Uani 0.407(11) 1 d PD B 2
H51D H 0.1371 0.4212 0.0940 0.329 Uiso 0.407(11) 1 calc PR B 2
H51E H 0.0671 0.3864 0.0804 0.329 Uiso 0.407(11) 1 calc PR B 2
H51F H 0.1484 0.3959 0.0567 0.329 Uiso 0.407(11) 1 calc PR B 2
C52A C 0.4013(18) 0.3515(8) 0.1928(7) 0.097(9) Uani 0.407(11) 1 d PD B 2
H52A H 0.3552 0.3346 0.2049 0.117 Uiso 0.407(11) 1 calc PR B 2
C53A C 0.4818(14) 0.3226(10) 0.1947(6) 0.166(10) Uani 0.407(11) 1 d P B 2
H53D H 0.4945 0.3156 0.2195 0.249 Uiso 0.407(11) 1 calc PR B 2
H53E H 0.5284 0.3397 0.1842 0.249 Uiso 0.407(11) 1 calc PR B 2
H53F H 0.4736 0.2942 0.1814 0.249 Uiso 0.407(11) 1 calc PR B 2
C54A C 0.414(3) 0.3976(12) 0.2115(14) 0.170(19) Uani 0.407(11) 1 d PD B 2
H54D H 0.4260 0.3925 0.2367 0.255 Uiso 0.407(11) 1 calc PR B 2
H54E H 0.3623 0.4157 0.2094 0.255 Uiso 0.407(11) 1 calc PR B 2
H54F H 0.4602 0.4140 0.2004 0.255 Uiso 0.407(11) 1 calc PR B 2
C55 C 0.7884(4) 0.11036(15) 0.14949(14) 0.0900(18) Uani 1 1 d . . .
H55A H 0.7898 0.0875 0.1685 0.135 Uiso 1 1 calc R C .
H55B H 0.7333 0.1102 0.1382 0.135 Uiso 1 1 calc R . .
H55C H 0.7993 0.1405 0.1596 0.135 Uiso 1 1 calc R . .
C56 C 0.9753(4) 0.10529(19) 0.13775(17) 0.119(2) Uani 1 1 d . . .
H56A H 0.9829 0.0824 0.1564 0.178 Uiso 1 1 calc R C .
H56B H 0.9776 0.1358 0.1483 0.178 Uiso 1 1 calc R . .
H56C H 1.0198 0.1022 0.1200 0.178 Uiso 1 1 calc R . .
C57 C 0.8622(3) 0.14221(17) 0.08062(13) 0.0860(17) Uani 1 1 d . . .
H57A H 0.9038 0.1365 0.0620 0.129 Uiso 1 1 calc R C .
H57B H 0.8727 0.1720 0.0914 0.129 Uiso 1 1 calc R . .
H57C H 0.8060 0.1418 0.0702 0.129 Uiso 1 1 calc R . .
C58 C 1.0269(4) 0.0174(3) 0.0739(3) 0.204(4) Uani 1 1 d . . .
H58A H 1.0434 0.0086 0.0980 0.306 Uiso 1 1 calc R C .
H58B H 1.0460 0.0485 0.0690 0.306 Uiso 1 1 calc R . .
H58C H 1.0522 -0.0035 0.0567 0.306 Uiso 1 1 calc R . .
C59 C 0.8842(7) 0.0337(3) 0.02410(18) 0.209(5) Uani 1 1 d . . .
H59A H 0.8974 0.0661 0.0216 0.314 Uiso 1 1 calc R C .
H59B H 0.8246 0.0288 0.0193 0.314 Uiso 1 1 calc R . .
H59C H 0.9176 0.0161 0.0071 0.314 Uiso 1 1 calc R . .
C60 C 0.8815(4) -0.0470(2) 0.07263(18) 0.132(3) Uani 1 1 d . . .
H60A H 0.8947 -0.0583 0.0965 0.198 Uiso 1 1 calc R C .
H60B H 0.9140 -0.0639 0.0550 0.198 Uiso 1 1 calc R . .
H60C H 0.8216 -0.0510 0.0680 0.198 Uiso 1 1 calc R . .
C61 C 0.9232(3) -0.01933(18) 0.18271(17) 0.099(2) Uani 1 1 d . C .
H61A H 0.9074 -0.0440 0.1665 0.148 Uiso 1 1 calc R . .
H61B H 0.9773 -0.0263 0.1937 0.148 Uiso 1 1 calc R . .
H61C H 0.9277 0.0092 0.1693 0.148 Uiso 1 1 calc R . .
C62 C 0.8889(9) 0.0371(5) 0.2430(5) 0.124(9) Uani 0.67(2) 1 d P C 1
H62A H 0.9016 0.0615 0.2260 0.186 Uiso 0.67(2) 1 calc PR C 1
H62B H 0.9406 0.0274 0.2548 0.186 Uiso 0.67(2) 1 calc PR C 1
H62C H 0.8492 0.0483 0.2608 0.186 Uiso 0.67(2) 1 calc PR C 1
C62A C 0.8584(12) 0.0150(7) 0.2658(6) 0.075(7) Uiso 0.33(2) 1 d P C 2
H62D H 0.8596 0.0482 0.2634 0.112 Uiso 0.33(2) 1 calc PR C 2
H62E H 0.9115 0.0045 0.2758 0.112 Uiso 0.33(2) 1 calc PR C 2
H62F H 0.8124 0.0063 0.2817 0.112 Uiso 0.33(2) 1 calc PR C 2
C63 C 0.8424(3) -0.0698(2) 0.24112(14) 0.105(2) Uani 1 1 d . C .
H63A H 0.8206 -0.0931 0.2249 0.157 Uiso 1 1 calc R . .
H63B H 0.8073 -0.0685 0.2625 0.157 Uiso 1 1 calc R . .
H63C H 0.8999 -0.0775 0.2479 0.157 Uiso 1 1 calc R . .
C64 C 0.9043(4) 0.50878(19) 0.18235(15) 0.100(2) Uani 1 1 d . . .
H64A H 0.8537 0.5275 0.1809 0.151 Uiso 1 1 calc R . .
H64B H 0.9381 0.5133 0.1609 0.151 Uiso 1 1 calc R . .
H64C H 0.9369 0.5177 0.2033 0.151 Uiso 1 1 calc R . .
C65 C 0.9724(4) 0.4132(3) 0.1876(2) 0.169(4) Uani 1 1 d . . .
H65A H 0.9971 0.4118 0.1638 0.254 Uiso 1 1 calc R . .
H65B H 0.9595 0.3823 0.1958 0.254 Uiso 1 1 calc R . .
H65C H 1.0121 0.4274 0.2041 0.254 Uiso 1 1 calc R . .
C66 C 0.8280(5) 0.4417(2) 0.23168(14) 0.123(2) Uani 1 1 d . . .
H66A H 0.7841 0.4646 0.2349 0.184 Uiso 1 1 calc R . .
H66B H 0.8718 0.4463 0.2496 0.184 Uiso 1 1 calc R . .
H66C H 0.8041 0.4112 0.2344 0.184 Uiso 1 1 calc R . .
C67 C 0.8566(4) 0.34775(17) 0.11665(15) 0.103(2) Uani 1 1 d . . .
H67A H 0.8779 0.3648 0.0962 0.155 Uiso 1 1 calc R . .
H67B H 0.8317 0.3191 0.1085 0.155 Uiso 1 1 calc R . .
H67C H 0.9028 0.3411 0.1330 0.155 Uiso 1 1 calc R . .
C68 C 0.7328(3) 0.34638(18) 0.17767(15) 0.0966(19) Uani 1 1 d . . .
H68A H 0.7780 0.3395 0.1944 0.145 Uiso 1 1 calc R . .
H68B H 0.7104 0.3180 0.1679 0.145 Uiso 1 1 calc R . .
H68C H 0.6881 0.3628 0.1901 0.145 Uiso 1 1 calc R . .
C69 C 0.6862(3) 0.38950(16) 0.10779(14) 0.0901(18) Uani 1 1 d . . .
H69A H 0.6390 0.4046 0.1195 0.135 Uiso 1 1 calc R . .
H69B H 0.6686 0.3595 0.0993 0.135 Uiso 1 1 calc R . .
H69C H 0.7049 0.4080 0.0876 0.135 Uiso 1 1 calc R . .
C70 C 0.9266(3) 0.49675(18) 0.07375(14) 0.0815(16) Uani 1 1 d . . .
H70A H 0.9235 0.5262 0.0858 0.122 Uiso 1 1 calc R . .
H70B H 0.9822 0.4931 0.0631 0.122 Uiso 1 1 calc R . .
H70C H 0.9168 0.4723 0.0910 0.122 Uiso 1 1 calc R . .
C71 C 0.8625(4) 0.4381(2) 0.01543(18) 0.141(3) Uani 1 1 d . . .
H71A H 0.8509 0.4134 0.0322 0.211 Uiso 1 1 calc R . .
H71B H 0.9207 0.4361 0.0074 0.211 Uiso 1 1 calc R . .
H71C H 0.8250 0.4355 -0.0051 0.211 Uiso 1 1 calc R . .
C72 C 0.8725(4) 0.5400(3) 0.00618(19) 0.169(4) Uani 1 1 d . . .
H72A H 0.8386 0.5368 -0.0154 0.254 Uiso 1 1 calc R . .
H72B H 0.9319 0.5377 0.0000 0.254 Uiso 1 1 calc R . .
H72C H 0.8615 0.5697 0.0171 0.254 Uiso 1 1 calc R . .
C81 C 0.2500 0.5000 0.1828(8) 0.165(9) Uiso 0.50 2 d SP . .
H81 H 0.2500 0.5000 0.2080 0.198 Uiso 0.50 2 calc SPR . .
C82 C 0.3216(14) 0.5003(6) 0.1677(6) 0.193(8) Uiso 0.50 1 d P . .
H82 H 0.3715 0.5017 0.1814 0.231 Uiso 0.50 1 calc PR . .
C83 C 0.3243(16) 0.4987(7) 0.1324(7) 0.215(9) Uiso 0.50 1 d P . .
H83 H 0.3750 0.4968 0.1193 0.258 Uiso 0.50 1 calc PR . .
C84 C 0.2500 0.5000 0.1173(9) 0.173(10) Uiso 0.50 2 d SPD . .
C85 C 0.2500 0.5000 0.0771(10) 0.46(4) Uiso 0.50 2 d SPD . .
H85A H 0.2637 0.4694 0.0684 0.686 Uiso 0.25 1 calc PR . .
H85B H 0.2918 0.5217 0.0684 0.686 Uiso 0.25 1 calc PR . .
H85C H 0.1945 0.5088 0.0684 0.686 Uiso 0.25 1 calc PR . .
 
loop_
 _atom_site_aniso_label
 _atom_site_aniso_U_11
 _atom_site_aniso_U_22
 _atom_site_aniso_U_33
 _atom_site_aniso_U_23
 _atom_site_aniso_U_13
 _atom_site_aniso_U_12
Na 0.0829(14) 0.0922(14) 0.0572(14) -0.0277(10) 0.0140(11) 0.0044(11)
Sr1 0.0554(4) 0.0559(4) 0.0474(4) 0.000 0.000 -0.0164(3)
Sr2 0.0632(4) 0.0436(3) 0.0324(3) 0.000 0.000 0.0121(3)
Si1 0.0816(10) 0.0656(9) 0.0535(10) 0.0096(7) 0.0027(8) -0.0283(8)
Si2 0.1124(15) 0.1292(16) 0.0831(14) -0.0174(11) 0.0450(12) 0.0027(12)
Si3 0.0699(10) 0.0602(9) 0.0728(11) -0.0204(7) -0.0206(8) 0.0141(7)
Si4 0.0806(10) 0.0861(11) 0.0578(11) 0.0069(8) -0.0169(8) 0.0175(9)
Si5 0.0870(11) 0.0481(8) 0.0653(10) 0.0117(7) 0.0011(8) 0.0079(7)
Si6 0.0754(10) 0.0940(11) 0.0431(9) 0.0012(8) 0.0137(7) 0.0120(9)
N1 0.032(2) 0.067(2) 0.037(2) 0.0022(19) 0.0019(17) 0.0063(18)
N2 0.041(2) 0.051(2) 0.029(2) -0.0019(17) 0.0017(16) 0.0014(18)
N3 0.061(3) 0.076(3) 0.042(3) -0.010(2) -0.006(2) 0.030(3)
N4 0.041(3) 0.140(5) 0.039(3) -0.019(3) 0.001(2) -0.005(3)
N5 0.065(3) 0.069(3) 0.056(3) -0.006(2) 0.024(2) -0.015(2)
N6 0.054(3) 0.047(3) 0.051(3) 0.000 0.000 0.000(3)
N7 0.060(2) 0.051(2) 0.042(2) 0.0072(17) -0.0020(18) 0.0082(18)
N8 0.059(3) 0.064(3) 0.035(3) 0.000 0.000 0.007(3)
C1 0.032(2) 0.055(3) 0.036(3) 0.003(2) 0.000(2) 0.000(2)
C2 0.050(3) 0.092(4) 0.031(3) -0.010(3) 0.005(2) 0.009(3)
C3 0.050(3) 0.069(3) 0.037(3) -0.009(2) 0.005(2) 0.014(2)
C4 0.039(3) 0.086(4) 0.036(3) 0.007(3) 0.002(2) 0.018(3)
C5 0.042(3) 0.090(4) 0.035(3) -0.007(3) -0.002(2) 0.009(3)
C6 0.032(3) 0.119(5) 0.054(4) -0.011(3) -0.006(3) 0.015(3)
C7 0.055(4) 0.118(5) 0.065(4) 0.019(4) -0.004(3) 0.022(3)
C8 0.056(4) 0.125(5) 0.079(4) 0.045(4) 0.002(3) 0.013(4)
C9 0.043(3) 0.109(4) 0.070(4) 0.046(3) 0.002(3) 0.011(3)
C10 0.041(3) 0.093(4) 0.068(4) -0.007(3) -0.007(3) -0.008(3)
C11 0.187(7) 0.126(6) 0.112(6) -0.036(5) -0.041(5) -0.047(5)
C12 0.200(8) 0.126(6) 0.188(9) -0.014(6) 0.132(7) -0.038(6)
C13 0.054(7) 0.070(10) 0.079(13) 0.025(10) -0.001(7) 0.002(6)
C14 0.049(6) 0.157(16) 0.134(17) 0.081(14) 0.026(8) 0.016(8)
C15 0.065(7) 0.117(11) 0.116(13) 0.032(9) -0.016(8) -0.029(7)
C14A 0.078(15) 0.13(2) 0.053(15) 0.016(13) 0.044(11) -0.006(15)
C15A 0.055(19) 0.15(3) 0.13(3) -0.09(3) -0.01(2) 0.027(18)
C16 0.055(3) 0.048(3) 0.033(3) -0.002(2) 0.000(2) 0.010(2)
C17 0.046(3) 0.058(3) 0.044(3) 0.004(2) -0.002(2) 0.005(2)
C18 0.063(3) 0.084(4) 0.050(4) 0.006(3) -0.018(3) 0.006(3)
C19 0.077(4) 0.094(4) 0.048(4) 0.013(3) -0.006(3) 0.024(3)
C20 0.076(4) 0.073(3) 0.048(4) 0.017(3) 0.007(3) 0.016(3)
C21 0.059(3) 0.053(3) 0.042(3) 0.004(2) 0.005(2) 0.010(2)
C22 0.053(3) 0.084(4) 0.060(4) 0.014(3) -0.007(3) -0.007(3)
C23 0.099(5) 0.083(4) 0.124(6) 0.013(4) -0.005(4) -0.016(3)
C24 0.057(4) 0.138(5) 0.106(5) 0.036(4) 0.001(3) 0.001(3)
C25 0.068(4) 0.069(3) 0.064(4) 0.007(3) 0.007(3) -0.017(3)
C26 0.171(8) 0.072(5) 0.279(12) 0.019(6) -0.056(7) -0.049(5)
C27 0.066(4) 0.198(8) 0.160(7) -0.056(6) 0.029(4) -0.026(5)
C28 0.048(4) 0.144(6) 0.046(4) -0.034(4) -0.008(3) 0.018(4)
C29 0.072(3) 0.070(3) 0.036(3) -0.009(3) -0.001(3) 0.031(3)
C30 0.057(3) 0.086(4) 0.041(3) -0.005(3) -0.003(3) 0.011(3)
C31 0.050(12) 0.050(12) 0.020(8) 0.004(7) 0.007(6) 0.009(8)
C32 0.09(2) 0.065(13) 0.051(9) 0.011(9) 0.016(12) 0.030(13)
C33 0.17(3) 0.073(16) 0.052(10) 0.029(11) 0.006(12) 0.033(16)
C34 0.17(3) 0.024(9) 0.069(13) 0.010(9) 0.032(18) 0.004(15)
C35 0.11(2) 0.044(12) 0.072(12) -0.001(9) 0.000(14) 0.001(14)
C36 0.096(14) 0.034(8) 0.033(8) 0.004(6) 0.013(8) -0.005(9)
C37 0.093(14) 0.063(10) 0.075(10) -0.001(9) -0.028(9) 0.033(9)
C38 0.085(11) 0.25(2) 0.082(12) -0.030(12) -0.009(8) 0.057(12)
C39 0.20(2) 0.076(11) 0.066(12) 0.001(9) -0.029(14) 0.034(12)
C40 0.063(7) 0.025(7) 0.035(6) -0.001(5) -0.017(5) -0.011(7)
C41 0.105(11) 0.107(12) 0.052(11) 0.014(7) 0.035(9) 0.030(8)
C42 0.073(8) 0.066(7) 0.050(7) 0.000(5) -0.010(6) -0.015(5)
C31A 0.06(2) 0.026(11) 0.031(14) 0.003(9) 0.026(11) -0.007(12)
C32A 0.036(13) 0.040(15) 0.041(14) 0.010(11) -0.011(9) 0.007(11)
C33A 0.11(2) 0.031(14) 0.035(14) 0.009(9) 0.007(13) 0.025(12)
C34A 0.055(13) 0.034(11) 0.063(13) 0.010(8) -0.003(10) 0.002(9)
C35A 0.072(18) 0.030(14) 0.056(13) -0.002(10) 0.010(13) -0.002(12)
C37A 0.082(17) 0.024(11) 0.068(14) 0.005(10) -0.023(11) 0.004(10)
C38A 0.050(11) 0.123(15) 0.066(13) 0.003(10) 0.006(8) 0.008(10)
C39A 0.076(13) 0.094(17) 0.047(13) 0.010(10) -0.024(9) -0.015(10)
C40A 0.082(18) 0.024(12) 0.075(15) -0.009(9) -0.004(13) -0.018(10)
C41A 0.094(15) 0.18(3) 0.09(2) 0.049(16) 0.028(14) 0.094(19)
C42A 0.16(2) 0.089(15) 0.077(15) -0.014(12) -0.073(17) 0.032(14)
C43 0.052(8) 0.054(7) 0.051(7) -0.005(7) 0.008(5) -0.003(6)
C44 0.058(7) 0.063(7) 0.049(6) 0.007(6) 0.002(5) -0.004(6)
C45 0.093(9) 0.089(9) 0.079(8) 0.020(7) 0.002(6) -0.019(8)
C46 0.111(11) 0.157(16) 0.066(9) 0.009(8) 0.008(7) -0.075(10)
C47 0.077(9) 0.144(14) 0.096(12) -0.008(11) 0.025(8) -0.060(9)
C48 0.057(8) 0.113(11) 0.061(8) -0.034(9) 0.002(6) -0.027(9)
C49 0.040(8) 0.087(11) 0.063(8) 0.020(8) -0.012(6) -0.008(7)
C50 0.113(11) 0.102(13) 0.125(14) 0.005(12) -0.046(9) -0.022(11)
C51 0.070(11) 0.21(2) 0.136(13) 0.086(13) 0.012(9) 0.012(10)
C52 0.040(7) 0.133(15) 0.086(12) -0.003(12) -0.004(7) -0.030(10)
C53 0.087(9) 0.144(12) 0.101(10) -0.022(9) -0.008(7) -0.007(8)
C54 0.067(8) 0.27(3) 0.071(12) -0.082(18) 0.001(7) -0.023(14)
C43A 0.041(10) 0.042(9) 0.067(11) 0.002(9) -0.007(8) -0.001(9)
C44A 0.081(13) 0.038(8) 0.060(10) 0.000(8) 0.017(9) -0.011(9)
C45A 0.132(18) 0.086(15) 0.090(14) -0.005(11) 0.005(13) -0.030(15)
C46A 0.26(4) 0.082(16) 0.12(2) -0.017(15) 0.14(2) -0.051(19)
C47A 0.115(18) 0.14(2) 0.11(2) -0.028(17) 0.023(15) -0.085(19)
C48A 0.080(16) 0.069(12) 0.108(17) -0.032(13) 0.019(12) -0.020(12)
C49A 0.085(15) 0.083(15) 0.030(9) -0.006(9) -0.025(9) 0.011(12)
C50A 0.123(15) 0.087(14) 0.18(2) -0.041(16) -0.085(14) 0.008(14)
C51A 0.11(3) 0.21(5) 0.34(7) 0.12(5) -0.06(3) -0.03(3)
C52A 0.090(16) 0.113(19) 0.089(18) -0.006(14) -0.032(11) -0.032(17)
C53A 0.099(16) 0.21(3) 0.19(2) 0.01(2) 0.003(14) 0.063(18)
C54A 0.23(5) 0.14(3) 0.13(3) -0.04(2) -0.08(3) -0.01(2)
C55 0.158(5) 0.051(3) 0.061(4) 0.005(3) 0.032(4) -0.005(3)
C56 0.128(5) 0.105(5) 0.122(6) 0.042(4) -0.051(4) -0.056(4)
C57 0.091(4) 0.095(4) 0.072(4) 0.031(3) 0.008(3) -0.020(3)
C58 0.098(6) 0.269(11) 0.245(11) -0.052(9) 0.089(7) 0.000(6)
C59 0.362(14) 0.191(8) 0.074(6) -0.009(6) 0.072(7) 0.072(9)
C60 0.160(6) 0.112(5) 0.123(6) -0.051(4) 0.019(5) 0.031(5)
C61 0.058(3) 0.079(4) 0.160(6) 0.049(4) 0.009(4) 0.008(3)
C62 0.120(10) 0.109(10) 0.144(15) -0.077(10) -0.071(10) 0.039(8)
C63 0.099(4) 0.148(5) 0.067(4) 0.049(4) 0.017(3) 0.054(4)
C64 0.104(5) 0.126(5) 0.071(4) 0.000(4) -0.036(3) -0.032(4)
C65 0.112(6) 0.209(8) 0.187(8) -0.057(6) -0.082(5) 0.083(6)
C66 0.206(7) 0.112(5) 0.050(4) 0.014(3) -0.007(4) -0.002(5)
C67 0.145(6) 0.070(4) 0.095(5) -0.008(3) 0.020(4) 0.033(4)
C68 0.106(5) 0.078(4) 0.106(5) 0.036(3) -0.002(4) -0.014(3)
C69 0.119(5) 0.060(3) 0.091(5) 0.009(3) -0.031(4) -0.022(3)
C70 0.059(3) 0.097(4) 0.088(4) -0.007(3) 0.011(3) 0.001(3)
C71 0.114(5) 0.188(7) 0.119(6) -0.091(5) -0.001(4) 0.044(5)
C72 0.120(6) 0.262(10) 0.126(7) 0.113(7) 0.052(5) 0.036(6)
 
_geom_special_details
;
 All esds (except the esd in the dihedral angle between two l.s. planes)
 are estimated using the full covariance matrix.  The cell esds are taken
 into account individually in the estimation of esds in distances, angles
 and torsion angles; correlations between esds in cell parameters are only
 used when they are defined by crystal symmetry.  An approximate (isotropic)
 treatment of cell esds is used for estimating esds involving l.s. planes.
;
 
loop_
 _geom_bond_atom_site_label_1
 _geom_bond_atom_site_label_2
 _geom_bond_distance
 _geom_bond_site_symmetry_2
 _geom_bond_publ_flag
Na C28 2.439(6) . ?
Na C1 2.452(4) . ?
Sr1 N6 2.461(5) . ?
Sr1 N5 2.461(3) 2_655 ?
Sr1 N5 2.461(3) . ?
Sr1 C55 3.353(5) 2_655 ?
Sr1 C61 3.374(5) 2_655 ?
Sr1 C60 3.408(6) 2_655 ?
Sr1 C60 3.408(6) . ?
Sr1 Si1 3.4981(13) 2_655 ?
Sr1 Si1 3.4981(13) . ?
Sr1 Si2 3.5216(18) 2_655 ?
Sr1 Si2 3.5216(18) . ?
Sr1 Si3 3.5234(16) . ?
Sr2 N8 2.455(5) . ?
Sr2 N7 2.464(3) . ?
Sr2 N7 2.464(3) 2_665 ?
Sr2 C70 3.341(5) 2_665 ?
Sr2 C64 3.384(5) 2_665 ?
Sr2 Si6 3.4841(14) 2_665 ?
Sr2 Si6 3.4841(14) . ?
Sr2 Si4 3.5091(14) . ?
Sr2 Si4 3.5091(14) 2_665 ?
Sr2 Si5 3.5427(13) . ?
Sr2 Si5 3.5427(13) 2_665 ?
Si1 N5 1.665(4) . ?
Si1 C55 1.868(5) . ?
Si1 C57 1.883(5) . ?
Si1 C56 1.889(5) . ?
Si2 N5 1.676(4) . ?
Si2 C59 1.847(8) . ?
Si2 C60 1.870(7) . ?
Si2 C58 1.900(7) . ?
Si3 N6 1.672(2) . ?
Si3 C63 1.872(5) . ?
Si3 C61 1.886(6) . ?
Si3 C62 1.903(9) . ?
Si3 C62A 1.987(19) . ?
Si4 N7 1.675(4) . ?
Si4 C65 1.864(6) . ?
Si4 C64 1.871(6) . ?
Si4 C66 1.875(6) . ?
Si5 N7 1.672(4) . ?
Si5 C69 1.883(5) . ?
Si5 C68 1.886(5) . ?
Si5 C67 1.889(5) . ?
Si6 N8 1.670(2) . ?
Si6 C72 1.853(6) . ?
Si6 C71 1.873(6) . ?
Si6 C70 1.878(5) . ?
N1 C1 1.367(5) . ?
N1 C2 1.377(5) . ?
N1 C4 1.444(5) . ?
N2 C1 1.365(5) . ?
N2 C3 1.384(5) . ?
N2 C16 1.444(5) . ?
N3 C31 1.252(16) . ?
N3 C28 1.375(6) . ?
N3 C29 1.390(5) . ?
N3 C31A 1.73(2) . ?
N4 C43A 1.322(19) . ?
N4 C28 1.358(7) . ?
N4 C30 1.372(6) . ?
N4 C43 1.578(13) . ?
N6 Si3 1.672(2) 2_655 ?
N8 Si6 1.670(2) 2_665 ?
C2 C3 1.342(6) . ?
C4 C9 1.386(6) . ?
C4 C5 1.391(6) . ?
C5 C6 1.397(6) . ?
C5 C10 1.501(6) . ?
C6 C7 1.367(7) . ?
C7 C8 1.366(7) . ?
C8 C9 1.392(6) . ?
C9 C13A 1.499(19) . ?
C9 C13 1.587(14) . ?
C10 C12 1.506(7) . ?
C10 C11 1.534(7) . ?
C13 C15 1.519(15) . ?
C13 C14 1.519(12) . ?
C13A C14A 1.49(3) . ?
C13A C15A 1.54(3) . ?
C16 C17 1.394(6) . ?
C16 C21 1.402(6) . ?
C17 C18 1.390(6) . ?
C17 C22 1.514(6) . ?
C18 C19 1.371(6) . ?
C19 C20 1.376(6) . ?
C20 C21 1.386(6) . ?
C21 C25 1.519(6) . ?
C22 C24 1.532(6) . ?
C22 C23 1.540(6) . ?
C25 C26 1.495(7) . ?
C25 C27 1.526(7) . ?
C29 C30 1.336(6) . ?
C31 C36 1.40(3) . ?
C31 C32 1.42(4) . ?
C32 C33 1.36(2) . ?
C32 C37 1.48(3) . ?
C33 C34 1.28(3) . ?
C34 C35 1.46(4) . ?
C35 C36 1.41(4) . ?
C36 C40 1.544(18) . ?
C37 C39 1.51(3) . ?
C37 C38 1.58(2) . ?
C40 C42 1.57(2) . ?
C40 C41 1.573(16) . ?
C31A C36A 1.36(4) . ?
C31A C32A 1.38(5) . ?
C32A C33A 1.41(5) . ?
C32A C37A 1.50(5) . ?
C33A C34A 1.48(6) . ?
C34A C35A 1.38(6) . ?
C35A C36A 1.35(5) . ?
C36A C40A 1.547(19) . ?
C37A C38A 1.49(3) . ?
C37A C39A 1.56(4) . ?
C40A C42A 1.41(3) . ?
C40A C41A 1.558(19) . ?
C43 C44 1.374(16) . ?
C43 C48 1.431(16) . ?
C44 C45 1.402(14) . ?
C44 C49 1.523(16) . ?
C45 C46 1.384(14) . ?
C46 C47 1.339(19) . ?
C47 C48 1.43(2) . ?
C48 C52 1.52(2) . ?
C49 C51 1.43(3) . ?
C49 C50 1.57(2) . ?
C52 C53 1.52(2) . ?
C52 C54 1.55(3) . ?
C43A C48A 1.35(3) . ?
C43A C44A 1.43(3) . ?
C44A C45A 1.36(2) . ?
C44A C49A 1.48(3) . ?
C45A C46A 1.42(3) . ?
C46A C47A 1.40(4) . ?
C47A C48A 1.35(3) . ?
C48A C52A 1.56(4) . ?
C49A C50A 1.48(3) . ?
C49A C51A 1.524(18) . ?
C52A C54A 1.541(19) . ?
C52A C53A 1.54(3) . ?
C81 C82 1.28(2) 2_565 ?
C81 C82 1.28(2) . ?
C82 C83 1.33(3) . ?
C83 C84 1.32(2) . ?
C84 C83 1.32(2) 2_565 ?
C84 C85 1.51(2) . ?
 
loop_
 _geom_angle_atom_site_label_1
 _geom_angle_atom_site_label_2
 _geom_angle_atom_site_label_3
 _geom_angle
 _geom_angle_site_symmetry_1
 _geom_angle_site_symmetry_3
 _geom_angle_publ_flag
C28 Na C1 174.11(18) . . ?
N6 Sr1 N5 120.04(9) . 2_655 ?
N6 Sr1 N5 120.04(9) . . ?
N5 Sr1 N5 119.91(17) 2_655 . ?
N6 Sr1 C55 79.82(9) . 2_655 ?
N5 Sr1 C55 57.03(12) 2_655 2_655 ?
N5 Sr1 C55 136.15(13) . 2_655 ?
N6 Sr1 C61 56.91(10) . 2_655 ?
N5 Sr1 C61 78.21(12) 2_655 2_655 ?
N5 Sr1 C61 138.67(12) . 2_655 ?
C55 Sr1 C61 85.17(14) 2_655 2_655 ?
N6 Sr1 C60 132.45(12) . 2_655 ?
N5 Sr1 C60 56.56(14) 2_655 2_655 ?
N5 Sr1 C60 82.83(15) . 2_655 ?
C55 Sr1 C60 113.44(14) 2_655 2_655 ?
C61 Sr1 C60 78.11(16) 2_655 2_655 ?
N6 Sr1 C60 132.45(12) . . ?
N5 Sr1 C60 82.83(15) 2_655 . ?
N5 Sr1 C60 56.56(14) . . ?
C55 Sr1 C60 80.83(15) 2_655 . ?
C61 Sr1 C60 160.55(14) 2_655 . ?
C60 Sr1 C60 95.1(2) 2_655 . ?
N6 Sr1 Si1 101.19(3) . 2_655 ?
N5 Sr1 Si1 25.64(9) 2_655 2_655 ?
N5 Sr1 Si1 135.02(9) . 2_655 ?
C55 Sr1 Si1 31.55(9) 2_655 2_655 ?
C61 Sr1 Si1 77.96(9) 2_655 2_655 ?
C60 Sr1 Si1 81.89(11) 2_655 2_655 ?
C60 Sr1 Si1 83.06(11) . 2_655 ?
N6 Sr1 Si1 101.19(3) . . ?
N5 Sr1 Si1 135.02(9) 2_655 . ?
N5 Sr1 Si1 25.64(9) . . ?
C55 Sr1 Si1 157.04(10) 2_655 . ?
C61 Sr1 Si1 114.86(9) 2_655 . ?
C60 Sr1 Si1 83.06(11) 2_655 . ?
C60 Sr1 Si1 81.89(11) . . ?
Si1 Sr1 Si1 157.63(5) 2_655 . ?
N6 Sr1 Si2 133.11(4) . 2_655 ?
N5 Sr1 Si2 25.46(9) 2_655 2_655 ?
N5 Sr1 Si2 102.63(10) . 2_655 ?
C55 Sr1 Si2 82.48(9) 2_655 2_655 ?
C61 Sr1 Si2 78.67(10) 2_655 2_655 ?
C60 Sr1 Si2 31.25(11) 2_655 2_655 ?
C60 Sr1 Si2 86.13(13) . 2_655 ?
Si1 Sr1 Si2 51.05(4) 2_655 2_655 ?
Si1 Sr1 Si2 111.32(4) . 2_655 ?
N6 Sr1 Si2 133.11(4) . . ?
N5 Sr1 Si2 102.63(10) 2_655 . ?
N5 Sr1 Si2 25.46(9) . . ?
C55 Sr1 Si2 111.86(11) 2_655 . ?
C61 Sr1 Si2 160.52(11) 2_655 . ?
C60 Sr1 Si2 86.13(13) 2_655 . ?
C60 Sr1 Si2 31.25(11) . . ?
Si1 Sr1 Si2 111.32(4) 2_655 . ?
Si1 Sr1 Si2 51.05(4) . . ?
Si2 Sr1 Si2 93.78(7) 2_655 . ?
N6 Sr1 Si3 25.33(2) . . ?
N5 Sr1 Si3 132.85(9) 2_655 . ?
N5 Sr1 Si3 103.00(9) . . ?
C55 Sr1 Si3 79.05(8) 2_655 . ?
C61 Sr1 Si3 82.20(10) 2_655 . ?
C60 Sr1 Si3 155.44(12) 2_655 . ?
C60 Sr1 Si3 108.09(12) . . ?
Si1 Sr1 Si3 108.27(4) 2_655 . ?
Si1 Sr1 Si3 92.13(3) . . ?
Si2 Sr1 Si3 154.37(4) 2_655 . ?
Si2 Sr1 Si3 109.50(4) . . ?
N8 Sr2 N7 119.28(8) . . ?
N8 Sr2 N7 119.28(8) . 2_665 ?
N7 Sr2 N7 121.43(16) . 2_665 ?
N8 Sr2 C70 57.73(9) . 2_665 ?
N7 Sr2 C70 127.10(12) . 2_665 ?
N7 Sr2 C70 85.36(12) 2_665 2_665 ?
N8 Sr2 C64 132.87(11) . 2_665 ?
N7 Sr2 C64 83.28(13) . 2_665 ?
N7 Sr2 C64 56.74(12) 2_665 2_665 ?
C70 Sr2 C64 75.49(14) 2_665 2_665 ?
N8 Sr2 Si6 26.00(3) . 2_665 ?
N7 Sr2 Si6 130.01(8) . 2_665 ?
N7 Sr2 Si6 103.67(8) 2_665 2_665 ?
C70 Sr2 Si6 31.85(9) 2_665 2_665 ?
C64 Sr2 Si6 107.32(11) 2_665 2_665 ?
N8 Sr2 Si6 26.00(3) . . ?
N7 Sr2 Si6 103.67(8) . . ?
N7 Sr2 Si6 130.01(8) 2_665 . ?
C70 Sr2 Si6 83.66(9) 2_665 . ?
C64 Sr2 Si6 157.71(11) 2_665 . ?
Si6 Sr2 Si6 51.99(5) 2_665 . ?
N8 Sr2 Si4 134.17(3) . . ?
N7 Sr2 Si4 25.72(8) . . ?
N7 Sr2 Si4 102.67(8) 2_665 . ?
C70 Sr2 Si4 149.69(9) 2_665 . ?
C64 Sr2 Si4 84.56(11) 2_665 . ?
Si6 Sr2 Si4 153.45(4) 2_665 . ?
Si6 Sr2 Si4 110.97(4) . . ?
N8 Sr2 Si4 134.17(3) . 2_665 ?
N7 Sr2 Si4 102.67(8) . 2_665 ?
N7 Sr2 Si4 25.72(8) 2_665 2_665 ?
C70 Sr2 Si4 83.15(9) 2_665 2_665 ?
C64 Sr2 Si4 31.42(10) 2_665 2_665 ?
Si6 Sr2 Si4 110.97(4) 2_665 2_665 ?
Si6 Sr2 Si4 153.45(4) . 2_665 ?
Si4 Sr2 Si4 91.67(5) . 2_665 ?
N8 Sr2 Si5 101.78(3) . . ?
N7 Sr2 Si5 24.98(8) . . ?
N7 Sr2 Si5 134.96(8) 2_665 . ?
C70 Sr2 Si5 103.36(9) 2_665 . ?
C64 Sr2 Si5 82.42(10) 2_665 . ?
Si6 Sr2 Si5 106.25(4) 2_665 . ?
Si6 Sr2 Si5 95.01(4) . . ?
Si4 Sr2 Si5 50.69(4) . . ?
Si4 Sr2 Si5 110.42(4) 2_665 . ?
N8 Sr2 Si5 101.78(3) . 2_665 ?
N7 Sr2 Si5 134.96(8) . 2_665 ?
N7 Sr2 Si5 24.98(8) 2_665 2_665 ?
C70 Sr2 Si5 89.26(9) 2_665 2_665 ?
C64 Sr2 Si5 81.61(10) 2_665 2_665 ?
Si6 Sr2 Si5 95.01(4) 2_665 2_665 ?
Si6 Sr2 Si5 106.25(4) . 2_665 ?
Si4 Sr2 Si5 110.42(4) . 2_665 ?
Si4 Sr2 Si5 50.69(4) 2_665 2_665 ?
Si5 Sr2 Si5 156.43(5) . 2_665 ?
N5 Si1 C55 109.3(2) . . ?
N5 Si1 C57 114.8(2) . . ?
C55 Si1 C57 106.1(2) . . ?
N5 Si1 C56 113.0(2) . . ?
C55 Si1 C56 107.2(3) . . ?
C57 Si1 C56 105.9(2) . . ?
N5 Si1 Sr1 39.77(12) . . ?
C55 Si1 Sr1 69.93(15) . . ?
C57 Si1 Sr1 132.45(17) . . ?
C56 Si1 Sr1 120.76(17) . . ?
N5 Si2 C59 113.3(3) . . ?
N5 Si2 C60 109.8(2) . . ?
C59 Si2 C60 107.2(4) . . ?
N5 Si2 C58 114.9(3) . . ?
C59 Si2 C58 105.8(5) . . ?
C60 Si2 C58 105.3(4) . . ?
N5 Si2 Sr1 39.14(12) . . ?
C59 Si2 Sr1 121.4(3) . . ?
C60 Si2 Sr1 71.0(2) . . ?
C58 Si2 Sr1 131.8(3) . . ?
N6 Si3 C63 114.4(2) . . ?
N6 Si3 C61 108.7(2) . . ?
C63 Si3 C61 103.4(2) . . ?
N6 Si3 C62 112.4(3) . . ?
C63 Si3 C62 117.6(6) . . ?
C61 Si3 C62 98.1(7) . . ?
N6 Si3 C62A 114.4(5) . . ?
C63 Si3 C62A 87.6(8) . . ?
C61 Si3 C62A 125.6(6) . . ?
C62 Si3 C62A 35.3(5) . . ?
N6 Si3 Sr1 39.01(15) . . ?
C63 Si3 Sr1 121.0(2) . . ?
C61 Si3 Sr1 69.82(18) . . ?
C62 Si3 Sr1 121.4(6) . . ?
C62A Si3 Sr1 145.4(6) . . ?
N7 Si4 C65 115.2(3) . . ?
N7 Si4 C64 109.3(2) . . ?
C65 Si4 C64 107.9(3) . . ?
N7 Si4 C66 114.0(3) . . ?
C65 Si4 C66 104.8(4) . . ?
C64 Si4 C66 104.9(3) . . ?
N7 Si4 Sr2 39.68(11) . . ?
C65 Si4 Sr2 137.3(3) . . ?
C64 Si4 Sr2 70.61(16) . . ?
C66 Si4 Sr2 116.9(2) . . ?
N7 Si5 C69 109.49(19) . . ?
N7 Si5 C68 114.2(2) . . ?
C69 Si5 C68 106.1(3) . . ?
N7 Si5 C67 113.9(2) . . ?
C69 Si5 C67 105.7(3) . . ?
C68 Si5 C67 106.9(3) . . ?
N7 Si5 Sr2 38.49(11) . . ?
C69 Si5 Sr2 71.37(15) . . ?
C68 Si5 Sr2 131.52(19) . . ?
C67 Si5 Sr2 120.65(18) . . ?
N8 Si6 C72 113.7(2) . . ?
N8 Si6 C71 114.1(2) . . ?
C72 Si6 C71 108.2(4) . . ?
N8 Si6 C70 109.7(2) . . ?
C72 Si6 C70 105.6(3) . . ?
C71 Si6 C70 104.8(3) . . ?
N8 Si6 Sr2 40.11(15) . . ?
C72 Si6 Sr2 130.3(3) . . ?
C71 Si6 Sr2 121.0(2) . . ?
C70 Si6 Sr2 69.86(16) . . ?
C1 N1 C2 112.1(3) . . ?
C1 N1 C4 124.2(4) . . ?
C2 N1 C4 123.6(4) . . ?
C1 N2 C3 113.2(3) . . ?
C1 N2 C16 122.9(3) . . ?
C3 N2 C16 123.9(3) . . ?
C31 N3 C28 119.7(10) . . ?
C31 N3 C29 128.5(9) . . ?
C28 N3 C29 111.7(5) . . ?
C28 N3 C31A 129.0(11) . . ?
C29 N3 C31A 118.9(11) . . ?
C43A N4 C28 104.8(9) . . ?
C43A N4 C30 140.2(9) . . ?
C28 N4 C30 113.4(5) . . ?
C28 N4 C43 131.0(6) . . ?
C30 N4 C43 115.6(6) . . ?
Si1 N5 Si2 129.8(2) . . ?
Si1 N5 Sr1 114.59(17) . . ?
Si2 N5 Sr1 115.40(19) . . ?
Si3 N6 Si3 128.7(3) 2_655 . ?
Si3 N6 Sr1 115.67(16) 2_655 . ?
Si3 N6 Sr1 115.67(16) . . ?
Si5 N7 Si4 128.8(2) . . ?
Si5 N7 Sr2 116.53(17) . . ?
Si4 N7 Sr2 114.60(17) . . ?
Si6 N8 Si6 132.2(3) 2_665 . ?
Si6 N8 Sr2 113.90(15) 2_665 . ?
Si6 N8 Sr2 113.90(15) . . ?
N2 C1 N1 101.8(3) . . ?
N2 C1 Na 120.4(3) . . ?
N1 C1 Na 137.5(3) . . ?
C3 C2 N1 107.5(4) . . ?
C2 C3 N2 105.3(4) . . ?
C9 C4 C5 123.2(4) . . ?
C9 C4 N1 118.8(4) . . ?
C5 C4 N1 118.0(4) . . ?
C4 C5 C6 115.9(5) . . ?
C4 C5 C10 122.0(4) . . ?
C6 C5 C10 122.1(4) . . ?
C7 C6 C5 122.2(5) . . ?
C8 C7 C6 120.2(5) . . ?
C7 C8 C9 120.7(5) . . ?
C4 C9 C8 117.8(5) . . ?
C4 C9 C13A 114.8(9) . . ?
C8 C9 C13A 122.9(9) . . ?
C4 C9 C13 123.0(5) . . ?
C8 C9 C13 118.7(6) . . ?
C5 C10 C12 112.2(5) . . ?
C5 C10 C11 112.5(5) . . ?
C12 C10 C11 110.0(5) . . ?
C15 C13 C14 110.5(10) . . ?
C15 C13 C9 114.6(9) . . ?
C14 C13 C9 109.9(9) . . ?
C14A C13A C9 119.5(17) . . ?
C14A C13A C15A 113(2) . . ?
C9 C13A C15A 95.7(18) . . ?
C17 C16 C21 123.0(4) . . ?
C17 C16 N2 118.9(4) . . ?
C21 C16 N2 118.1(4) . . ?
C18 C17 C16 117.0(4) . . ?
C18 C17 C22 121.1(4) . . ?
C16 C17 C22 121.9(4) . . ?
C19 C18 C17 121.1(5) . . ?
C18 C19 C20 120.9(5) . . ?
C19 C20 C21 120.9(5) . . ?
C20 C21 C16 117.1(4) . . ?
C20 C21 C25 120.4(4) . . ?
C16 C21 C25 122.5(4) . . ?
C17 C22 C24 112.7(4) . . ?
C17 C22 C23 109.5(4) . . ?
C24 C22 C23 111.4(4) . . ?
C26 C25 C21 112.3(5) . . ?
C26 C25 C27 110.7(5) . . ?
C21 C25 C27 110.6(4) . . ?
N4 C28 N3 101.8(5) . . ?
N4 C28 Na 122.9(4) . . ?
N3 C28 Na 135.2(5) . . ?
C30 C29 N3 106.6(5) . . ?
C29 C30 N4 106.4(5) . . ?
N3 C31 C36 115.0(17) . . ?
N3 C31 C32 120(2) . . ?
C36 C31 C32 125.1(16) . . ?
C33 C32 C31 111(3) . . ?
C33 C32 C37 126(3) . . ?
C31 C32 C37 122.8(18) . . ?
C34 C33 C32 130(3) . . ?
C33 C34 C35 118.0(19) . . ?
C36 C35 C34 118.0(19) . . ?
C31 C36 C35 117(2) . . ?
C31 C36 C40 122.9(13) . . ?
C35 C36 C40 120(2) . . ?
C32 C37 C39 113.8(16) . . ?
C32 C37 C38 109.0(16) . . ?
C39 C37 C38 110.3(15) . . ?
C36 C40 C42 104.7(13) . . ?
C36 C40 C41 114.8(15) . . ?
C42 C40 C41 105.6(12) . . ?
C36A C31A C32A 123(2) . . ?
C36A C31A N3 123(3) . . ?
C32A C31A N3 114(2) . . ?
C31A C32A C33A 119(3) . . ?
C31A C32A C37A 127(2) . . ?
C33A C32A C37A 114(3) . . ?
C32A C33A C34A 117(2) . . ?
C35A C34A C33A 121(2) . . ?
C36A C35A C34A 120(3) . . ?
C35A C36A C31A 121(3) . . ?
C35A C36A C40A 116(2) . . ?
C31A C36A C40A 122(2) . . ?
C38A C37A C32A 114(2) . . ?
C38A C37A C39A 109(2) . . ?
C32A C37A C39A 111.6(19) . . ?
C42A C40A C36A 122(2) . . ?
C42A C40A C41A 120(2) . . ?
C36A C40A C41A 104(2) . . ?
C44 C43 C48 124.6(11) . . ?
C44 C43 N4 120.1(9) . . ?
C48 C43 N4 115.2(11) . . ?
C43 C44 C45 116.3(10) . . ?
C43 C44 C49 122.4(10) . . ?
C45 C44 C49 121.2(10) . . ?
C46 C45 C44 121.6(10) . . ?
C47 C46 C45 120.5(11) . . ?
C46 C47 C48 122.5(11) . . ?
C47 C48 C43 114.3(13) . . ?
C47 C48 C52 123.3(12) . . ?
C43 C48 C52 122.4(13) . . ?
C51 C49 C44 115.0(16) . . ?
C51 C49 C50 109.2(14) . . ?
C44 C49 C50 105.3(12) . . ?
C48 C52 C53 112.3(12) . . ?
C48 C52 C54 111.7(17) . . ?
C53 C52 C54 109.3(13) . . ?
N4 C43A C48A 122.0(18) . . ?
N4 C43A C44A 112.6(15) . . ?
C48A C43A C44A 124.8(18) . . ?
C45A C44A C43A 117.4(17) . . ?
C45A C44A C49A 118.2(17) . . ?
C43A C44A C49A 124.4(14) . . ?
C44A C45A C46A 116.6(19) . . ?
C47A C46A C45A 124.3(18) . . ?
C48A C47A C46A 117(2) . . ?
C43A C48A C47A 119(2) . . ?
C43A C48A C52A 119(2) . . ?
C47A C48A C52A 122(2) . . ?
C44A C49A C50A 113.8(17) . . ?
C44A C49A C51A 116(2) . . ?
C50A C49A C51A 108(2) . . ?
C54A C52A C53A 111(3) . . ?
C54A C52A C48A 108(3) . . ?
C53A C52A C48A 112(2) . . ?
Si2 C60 Sr1 77.74(18) . . ?
C82 C81 C82 127(4) 2_565 . ?
C81 C82 C83 118(3) . . ?
C84 C83 C82 114(3) . . ?
C83 C84 C83 129(4) 2_565 . ?
C83 C84 C85 116(2) 2_565 . ?
C83 C84 C85 116(2) . . ?
 
_diffrn_measured_fraction_theta_max    0.977
_diffrn_reflns_theta_full              25.02
_diffrn_measured_fraction_theta_full   0.977
_refine_diff_density_max    0.541
_refine_diff_density_min   -0.475
_refine_diff_density_rms    0.050

#=====>END

#======================================================
 
data_compound8
 
_audit_creation_method            SHELXL-97
_chemical_name_systematic
;
 ?
;
_chemical_name_common             ?
_chemical_melting_point           ?
_chemical_formula_moiety          
'C54 H72 K N4, C18 H54 N3 Si6 Sr, C7 H8'
_chemical_formula_sum
 'C79 H134 K N7 Si6 Sr'
_chemical_formula_weight          1477.19
 
loop_
 _atom_type_symbol
 _atom_type_description
 _atom_type_scat_dispersion_real
 _atom_type_scat_dispersion_imag
 _atom_type_scat_source
 'C'  'C'   0.0033   0.0016
 'International Tables Vol C Tables 4.2.6.8 and 6.1.1.4'
 'H'  'H'   0.0000   0.0000
 'International Tables Vol C Tables 4.2.6.8 and 6.1.1.4'
 'N'  'N'   0.0061   0.0033
 'International Tables Vol C Tables 4.2.6.8 and 6.1.1.4'
 'Si'  'Si'   0.0817   0.0704
 'International Tables Vol C Tables 4.2.6.8 and 6.1.1.4'
 'Sr'  'Sr'  -1.5307   3.2498
 'International Tables Vol C Tables 4.2.6.8 and 6.1.1.4'
 'K'  'K'   0.2009   0.2494
 'International Tables Vol C Tables 4.2.6.8 and 6.1.1.4'
 
_symmetry_cell_setting            monoclinic
_symmetry_space_group_name_H-M    'P 1 21/n 1'
 
loop_
 _symmetry_equiv_pos_as_xyz
 'x, y, z'
 '-x+1/2, y+1/2, -z+1/2'
 '-x, -y, -z'
 'x-1/2, -y-1/2, z-1/2'
 
_cell_length_a                    16.90140(10)
_cell_length_b                    18.94360(10)
_cell_length_c                    28.9610(2)
_cell_angle_alpha                 90.00
_cell_angle_beta                  96.6690(10)
_cell_angle_gamma                 90.00
_cell_volume                      9209.80(10)
_cell_formula_units_Z             4
_cell_measurement_temperature     150(2)
_cell_measurement_reflns_used     127648
_cell_measurement_theta_min        2.910
_cell_measurement_theta_max        27.485
 
_exptl_crystal_description        block
_exptl_crystal_colour             colourless
_exptl_crystal_size_max           0.30
_exptl_crystal_size_mid           0.25
_exptl_crystal_size_min           0.25
_exptl_crystal_density_meas       ?
_exptl_crystal_density_diffrn     1.065
_exptl_crystal_density_method     'not measured'
_exptl_crystal_F_000              3192
_exptl_absorpt_coefficient_mu     0.749
_exptl_absorpt_correction_type    none
_exptl_absorpt_correction_T_min   ?
_exptl_absorpt_correction_T_max   ?
_exptl_absorpt_process_details    ?
 
_exptl_special_details
;
 ?
;
 
_diffrn_ambient_temperature       150(2)
_diffrn_radiation_wavelength      0.71073
_diffrn_radiation_type            MoK\a
_diffrn_radiation_source          'fine-focus sealed tube'
_diffrn_radiation_monochromator   graphite
_diffrn_measurement_device_type   'Nonius Kappa CCD'
_diffrn_measurement_method        '482 1.4 degree images with \F and \w scans'
_diffrn_standards_number          0
_diffrn_standards_decay_%         0
_diffrn_reflns_number             131455
_diffrn_reflns_av_R_equivalents   0.0618
_diffrn_reflns_av_sigmaI/netI     0.0439
_diffrn_reflns_limit_h_min        -21
_diffrn_reflns_limit_h_max        21
_diffrn_reflns_limit_k_min        -24
_diffrn_reflns_limit_k_max        24
_diffrn_reflns_limit_l_min        -37
_diffrn_reflns_limit_l_max        37
_diffrn_reflns_theta_min          3.52
_diffrn_reflns_theta_max          27.38
_reflns_number_total              20750
_reflns_number_gt                 14603
_reflns_threshold_expression      >2sigma(I)
 
_computing_data_collection        'Collect (Nonius BV, 1997-2000)'
_computing_cell_refinement         'HKL Scalepack (Otwinski & Minor, 1997)'
_computing_data_reduction         
;
 DENZO-SCALEPACK Z. Otwinowski and W. Minor, " 
 Processing of X-ray Diffraction Data Collected in Oscillation Mode ", 
 Methods in Enzymology, Volume 276: Macromolecular Crystallography, 
 part A, p.307-326, 1997,C.W. Carter, Jr. & R. M. Sweet, Eds., Academic Press.
;
_computing_structure_solution     
; 
 SIR97- Altomare A., Burla M.C., Camalli M., Cascarano G.L., Giacovazzo C. , 
 Guagliardi A., Moliterni A.G.G., Polidori G.,Spagna R. 
 (1999) J. Appl. Cryst. 32, 115-119
;
_computing_structure_refinement   
;
 SHELXL97 -Program for Crystal Structure Analysis (Release 97-2). 
 Sheldrick, G.M., Instit\"ut f\"ur Anorganische Chemie der Universit\"at, 
 Tammanstrasse 4, D-3400 G\"ottingen, Germany, 1998 
;
_computing_molecular_graphics  

'ORTEP3 for Windows - Farrugia, L. J. J. Appl. Crystallogr. 1997, 30, 565'

_computing_publication_material    
;
 'WinGX publication routines, Farrugia, 
 L. J., J. Appl. Crystallogr., 1999, 32, 837-838
; 
 
_refine_special_details
;
 Refinement of F^2^ against ALL reflections.  The weighted R-factor wR and
 goodness of fit S are based on F^2^, conventional R-factors R are based
 on F, with F set to zero for negative F^2^. The threshold expression of
 F^2^ > 2sigma(F^2^) is used only for calculating R-factors(gt) etc. and is
 not relevant to the choice of reflections for refinement.  R-factors based
 on F^2^ are statistically about twice as large as those based on F, and R-
 factors based on ALL data will be even larger.
;
 
_refine_ls_structure_factor_coef  Fsqd
_refine_ls_matrix_type            full
_refine_ls_weighting_scheme       calc
_refine_ls_weighting_details
 'calc w=1/[\s^2^(Fo^2^)+(0.0457P)^2^+5.7037P] where P=(Fo^2^+2Fc^2^)/3'
_atom_sites_solution_primary      direct
_atom_sites_solution_secondary    difmap
_atom_sites_solution_hydrogens    geom
_refine_ls_hydrogen_treatment     constr
_refine_ls_extinction_method      none
_refine_ls_extinction_coef        ?
_refine_ls_number_reflns          20750
_refine_ls_number_parameters      884
_refine_ls_number_restraints      1
_refine_ls_R_factor_all           0.0803
_refine_ls_R_factor_gt            0.0476
_refine_ls_wR_factor_ref          0.1210
_refine_ls_wR_factor_gt           0.1050
_refine_ls_goodness_of_fit_ref    1.013
_refine_ls_restrained_S_all       1.017
_refine_ls_shift/su_max           0.001
_refine_ls_shift/su_mean          0.000
 
loop_
 _atom_site_label
 _atom_site_type_symbol
 _atom_site_fract_x
 _atom_site_fract_y
 _atom_site_fract_z
 _atom_site_U_iso_or_equiv
 _atom_site_adp_type
 _atom_site_occupancy
 _atom_site_symmetry_multiplicity
 _atom_site_calc_flag
 _atom_site_refinement_flags
 _atom_site_disorder_assembly
 _atom_site_disorder_group
Sr Sr 0.496293(14) 0.519249(11) 0.231513(7) 0.04018(7) Uani 1 1 d . . .
K1 K 0.5000 0.0000 0.5000 0.0636(3) Uani 1 2 d S . .
K2 K 0.0000 0.5000 0.5000 0.0686(3) Uani 1 2 d S . .
Si1 Si 0.60305(5) 0.38747(4) 0.17874(3) 0.05352(19) Uani 1 1 d . . .
Si2 Si 0.50216(4) 0.48645(4) 0.11294(2) 0.04368(16) Uani 1 1 d . . .
Si3 Si 0.43567(4) 0.69634(4) 0.24335(2) 0.04426(16) Uani 1 1 d . . .
Si4 Si 0.60974(5) 0.67381(4) 0.22977(3) 0.05044(18) Uani 1 1 d . . .
Si5 Si 0.47713(5) 0.48235(4) 0.34746(2) 0.05348(19) Uani 1 1 d . . .
Si6 Si 0.35213(6) 0.41280(5) 0.27755(3) 0.0722(3) Uani 1 1 d . . .
N1 N 0.18552(10) 0.37151(9) 0.54708(6) 0.0319(4) Uani 1 1 d . . .
N2 N 0.11689(10) 0.42523(9) 0.59287(6) 0.0323(4) Uani 1 1 d . . .
N3 N 0.56521(10) 0.20415(9) 0.48166(7) 0.0362(4) Uani 1 1 d . . .
N4 N 0.44591(10) 0.17238(9) 0.48539(6) 0.0322(4) Uani 1 1 d . . .
N5 N 0.53948(12) 0.45398(10) 0.16486(6) 0.0401(4) Uani 1 1 d . . .
N6 N 0.51701(12) 0.64819(10) 0.23707(6) 0.0398(4) Uani 1 1 d . . .
N7 N 0.43353(13) 0.46111(11) 0.29427(7) 0.0515(5) Uani 1 1 d . . .
C1 C 0.12407(13) 0.41766(11) 0.54659(7) 0.0331(5) Uani 1 1 d . . .
C2 C 0.17239(13) 0.38596(12) 0.62077(8) 0.0386(5) Uani 1 1 d . . .
H2 H 0.1787 0.3837 0.6538 0.046 Uiso 1 1 calc R . .
C3 C 0.21556(14) 0.35173(12) 0.59181(7) 0.0387(5) Uani 1 1 d . . .
H3 H 0.2584 0.3201 0.6003 0.046 Uiso 1 1 calc R . .
C4 C 0.21297(13) 0.34792(12) 0.50422(7) 0.0344(5) Uani 1 1 d . . .
C5 C 0.17710(13) 0.28844(12) 0.48204(8) 0.0387(5) Uani 1 1 d . . .
C6 C 0.19980(15) 0.27045(14) 0.43891(8) 0.0475(6) Uani 1 1 d . . .
H6 H 0.1776 0.2297 0.4233 0.057 Uiso 1 1 calc R . .
C7 C 0.25385(15) 0.31058(15) 0.41839(9) 0.0502(6) Uani 1 1 d . . .
H7 H 0.2673 0.2981 0.3885 0.060 Uiso 1 1 calc R . .
C8 C 0.28867(15) 0.36907(14) 0.44105(8) 0.0459(6) Uani 1 1 d . . .
H8 H 0.3261 0.3963 0.4266 0.055 Uiso 1 1 calc R . .
C9 C 0.26951(13) 0.38870(12) 0.48497(8) 0.0390(5) Uani 1 1 d . . .
C10 C 0.11464(14) 0.24500(13) 0.50267(9) 0.0449(6) Uani 1 1 d . . .
H10 H 0.1047 0.2675 0.5327 0.054 Uiso 1 1 calc R . .
C11 C 0.03618(16) 0.24451(19) 0.47071(12) 0.0713(9) Uani 1 1 d . . .
H11A H 0.0189 0.2932 0.4640 0.107 Uiso 1 1 calc R . .
H11B H -0.0044 0.2197 0.4860 0.107 Uiso 1 1 calc R . .
H11C H 0.0437 0.2204 0.4416 0.107 Uiso 1 1 calc R . .
C12 C 0.14376(19) 0.16975(15) 0.51315(12) 0.0673(8) Uani 1 1 d . . .
H12A H 0.1552 0.1469 0.4843 0.101 Uiso 1 1 calc R . .
H12B H 0.1024 0.1430 0.5266 0.101 Uiso 1 1 calc R . .
H12C H 0.1923 0.1710 0.5352 0.101 Uiso 1 1 calc R . .
C13 C 0.30755(15) 0.45314(13) 0.50921(9) 0.0488(6) Uani 1 1 d . . .
H13 H 0.2947 0.4525 0.5421 0.059 Uiso 1 1 calc R . .
C14 C 0.39820(18) 0.45178(18) 0.51055(12) 0.0715(9) Uani 1 1 d . . .
H14A H 0.4192 0.4088 0.5263 0.107 Uiso 1 1 calc R . .
H14B H 0.4210 0.4932 0.5274 0.107 Uiso 1 1 calc R . .
H14C H 0.4126 0.4525 0.4787 0.107 Uiso 1 1 calc R . .
C15 C 0.2722(2) 0.52051(15) 0.48643(12) 0.0710(9) Uani 1 1 d . . .
H15A H 0.2839 0.5225 0.4541 0.107 Uiso 1 1 calc R . .
H15B H 0.2957 0.5617 0.5034 0.107 Uiso 1 1 calc R . .
H15C H 0.2144 0.5207 0.4872 0.107 Uiso 1 1 calc R . .
C16 C 0.05954(13) 0.47527(12) 0.60698(7) 0.0375(5) Uani 1 1 d . . .
C17 C 0.08126(15) 0.54668(13) 0.60937(9) 0.0460(6) Uani 1 1 d . . .
C18 C 0.02174(18) 0.59515(15) 0.61682(11) 0.0646(8) Uani 1 1 d . . .
H18 H 0.0340 0.6441 0.6183 0.077 Uiso 1 1 calc R . .
C19 C -0.05446(18) 0.57306(18) 0.62198(12) 0.0726(10) Uani 1 1 d . . .
H19 H -0.0942 0.6070 0.6265 0.087 Uiso 1 1 calc R . .
C20 C -0.07344(17) 0.50244(18) 0.62059(10) 0.0618(8) Uani 1 1 d . . .
H20 H -0.1260 0.4882 0.6249 0.074 Uiso 1 1 calc R . .
C21 C -0.01691(14) 0.45117(14) 0.61301(8) 0.0448(6) Uani 1 1 d . . .
C22 C 0.16549(16) 0.57091(13) 0.60458(10) 0.0532(7) Uani 1 1 d . . .
H22 H 0.1922 0.5324 0.5886 0.064 Uiso 1 1 calc R . .
C23 C 0.1688(2) 0.63757(16) 0.57534(10) 0.0658(8) Uani 1 1 d . . .
H23A H 0.1365 0.6309 0.5453 0.099 Uiso 1 1 calc R . .
H23B H 0.2242 0.6470 0.5702 0.099 Uiso 1 1 calc R . .
H23C H 0.1481 0.6776 0.5917 0.099 Uiso 1 1 calc R . .
C24 C 0.21245(19) 0.58147(17) 0.65224(12) 0.0739(9) Uani 1 1 d . . .
H24A H 0.1871 0.6185 0.6691 0.111 Uiso 1 1 calc R . .
H24B H 0.2671 0.5955 0.6485 0.111 Uiso 1 1 calc R . .
H24C H 0.2133 0.5372 0.6698 0.111 Uiso 1 1 calc R . .
C25 C -0.03803(15) 0.37337(15) 0.60991(9) 0.0532(7) Uani 1 1 d . . .
H25 H 0.0112 0.3460 0.6209 0.064 Uiso 1 1 calc R . .
C26 C -0.06486(19) 0.35102(16) 0.56001(10) 0.0630(8) Uani 1 1 d . . .
H26A H -0.1130 0.3773 0.5482 0.094 Uiso 1 1 calc R . .
H26B H -0.0764 0.3003 0.5591 0.094 Uiso 1 1 calc R . .
H26C H -0.0224 0.3611 0.5406 0.094 Uiso 1 1 calc R . .
C27 C -0.1023(2) 0.3526(2) 0.64044(12) 0.0866(11) Uani 1 1 d . . .
H27A H -0.0871 0.3694 0.6722 0.130 Uiso 1 1 calc R . .
H27B H -0.1079 0.3012 0.6406 0.130 Uiso 1 1 calc R . .
H27C H -0.1532 0.3741 0.6280 0.130 Uiso 1 1 calc R . .
C28 C 0.52127(12) 0.14551(11) 0.48711(8) 0.0337(5) Uani 1 1 d . . .
C29 C 0.51939(14) 0.26503(12) 0.47694(9) 0.0443(6) Uani 1 1 d . . .
H29 H 0.5379 0.3117 0.4727 0.053 Uiso 1 1 calc R . .
C30 C 0.44372(14) 0.24508(12) 0.47947(8) 0.0408(5) Uani 1 1 d . . .
H30 H 0.3981 0.2747 0.4776 0.049 Uiso 1 1 calc R . .
C31 C 0.65080(13) 0.20065(12) 0.48195(9) 0.0410(5) Uani 1 1 d . . .
C32 C 0.69781(14) 0.20567(13) 0.52486(10) 0.0494(6) Uani 1 1 d . B .
C33 C 0.77979(16) 0.19735(15) 0.52461(12) 0.0633(8) Uani 1 1 d . . .
H33 H 0.8139 0.2001 0.5530 0.076 Uiso 1 1 calc R . .
C34 C 0.81180(17) 0.18520(16) 0.48399(14) 0.0712(9) Uani 1 1 d . . .
H34 H 0.8678 0.1795 0.4847 0.085 Uiso 1 1 calc R . .
C35 C 0.76442(16) 0.18108(15) 0.44240(12) 0.0629(8) Uani 1 1 d . . .
H35 H 0.7880 0.1728 0.4147 0.076 Uiso 1 1 calc R . .
C36 C 0.68155(15) 0.18893(13) 0.44013(10) 0.0489(6) Uani 1 1 d . . .
C37 C 0.66193(16) 0.21541(14) 0.57008(10) 0.0535(7) Uani 1 1 d . . .
H37 H 0.6057 0.2313 0.5617 0.064 Uiso 1 1 calc R A 1
C38 C 0.6587(3) 0.1452(2) 0.59653(13) 0.0654(14) Uani 0.807(9) 1 d P B 1
H38A H 0.6284 0.1105 0.5766 0.098 Uiso 0.807(9) 1 calc PR B 1
H38B H 0.6326 0.1528 0.6246 0.098 Uiso 0.807(9) 1 calc PR B 1
H38C H 0.7129 0.1278 0.6052 0.098 Uiso 0.807(9) 1 calc PR B 1
C39 C 0.7033(3) 0.2716(3) 0.6030(2) 0.0870(19) Uani 0.807(9) 1 d P B 1
H39A H 0.7560 0.2544 0.6159 0.131 Uiso 0.807(9) 1 calc PR B 1
H39B H 0.6710 0.2807 0.6284 0.131 Uiso 0.807(9) 1 calc PR B 1
H39C H 0.7092 0.3154 0.5857 0.131 Uiso 0.807(9) 1 calc PR B 1
C38A C 0.7072(14) 0.1712(11) 0.6049(7) 0.074(6) Uiso 0.193(9) 1 d P B 2
H38D H 0.7039 0.1218 0.5947 0.111 Uiso 0.193(9) 1 calc PR B 2
H38E H 0.6853 0.1758 0.6346 0.111 Uiso 0.193(9) 1 calc PR B 2
H38F H 0.7631 0.1862 0.6087 0.111 Uiso 0.193(9) 1 calc PR B 2
C39A C 0.6737(14) 0.2938(11) 0.5774(8) 0.077(6) Uiso 0.193(9) 1 d P B 2
H39D H 0.7307 0.3042 0.5837 0.115 Uiso 0.193(9) 1 calc PR B 2
H39E H 0.6467 0.3090 0.6039 0.115 Uiso 0.193(9) 1 calc PR B 2
H39F H 0.6512 0.3191 0.5494 0.115 Uiso 0.193(9) 1 calc PR B 2
C40 C 0.62936(16) 0.18183(15) 0.39401(9) 0.0534(7) Uani 1 1 d . . .
H40 H 0.5728 0.1888 0.4000 0.064 Uiso 1 1 calc R . .
C41 C 0.6361(2) 0.10871(17) 0.37365(12) 0.0772(9) Uani 1 1 d . . .
H41A H 0.6904 0.1014 0.3659 0.116 Uiso 1 1 calc R . .
H41B H 0.5983 0.1042 0.3455 0.116 Uiso 1 1 calc R . .
H41C H 0.6239 0.0733 0.3964 0.116 Uiso 1 1 calc R . .
C42 C 0.6490(2) 0.23859(19) 0.35941(13) 0.0831(10) Uani 1 1 d . . .
H42A H 0.6440 0.2854 0.3732 0.125 Uiso 1 1 calc R . .
H42B H 0.6118 0.2348 0.3309 0.125 Uiso 1 1 calc R . .
H42C H 0.7036 0.2319 0.3520 0.125 Uiso 1 1 calc R . .
C43 C 0.38073(12) 0.12511(11) 0.49104(7) 0.0322(5) Uani 1 1 d . . .
C44 C 0.34028(12) 0.09431(12) 0.45142(8) 0.0375(5) Uani 1 1 d . . .
C45 C 0.28526(14) 0.04136(13) 0.45811(9) 0.0459(6) Uani 1 1 d . . .
H45 H 0.2565 0.0193 0.4319 0.055 Uiso 1 1 calc R . .
C46 C 0.27192(14) 0.02051(13) 0.50224(9) 0.0472(6) Uani 1 1 d . . .
H46 H 0.2352 -0.0164 0.5061 0.057 Uiso 1 1 calc R . .
C47 C 0.31196(14) 0.05319(13) 0.54094(9) 0.0423(5) Uani 1 1 d . . .
H47 H 0.3014 0.0391 0.5711 0.051 Uiso 1 1 calc R . .
C48 C 0.36739(12) 0.10639(11) 0.53631(8) 0.0346(5) Uani 1 1 d . . .
C49 C 0.35942(15) 0.11422(15) 0.40288(8) 0.0489(6) Uani 1 1 d . . .
H49 H 0.3824 0.1629 0.4050 0.059 Uiso 1 1 calc R . .
C50 C 0.28697(17) 0.11632(18) 0.36671(10) 0.0656(8) Uani 1 1 d . . .
H50A H 0.3014 0.1383 0.3382 0.098 Uiso 1 1 calc R . .
H50B H 0.2447 0.1439 0.3786 0.098 Uiso 1 1 calc R . .
H50C H 0.2680 0.0681 0.3599 0.098 Uiso 1 1 calc R . .
C51 C 0.42300(18) 0.0656(2) 0.38782(11) 0.0726(9) Uani 1 1 d . . .
H51A H 0.4029 0.0171 0.3860 0.109 Uiso 1 1 calc R . .
H51B H 0.4707 0.0681 0.4105 0.109 Uiso 1 1 calc R . .
H51C H 0.4365 0.0804 0.3573 0.109 Uiso 1 1 calc R . .
C52 C 0.41172(14) 0.14319(13) 0.57858(8) 0.0417(5) Uani 1 1 d . . .
H52 H 0.4648 0.1582 0.5700 0.050 Uiso 1 1 calc R . .
C53 C 0.42663(17) 0.09594(15) 0.62143(9) 0.0556(7) Uani 1 1 d . . .
H53A H 0.3758 0.0847 0.6329 0.083 Uiso 1 1 calc R . .
H53B H 0.4612 0.1206 0.6458 0.083 Uiso 1 1 calc R . .
H53C H 0.4525 0.0522 0.6132 0.083 Uiso 1 1 calc R . .
C54 C 0.36683(17) 0.20992(14) 0.58990(9) 0.0524(6) Uani 1 1 d . . .
H54A H 0.3584 0.2400 0.5622 0.079 Uiso 1 1 calc R . .
H54B H 0.3981 0.2357 0.6151 0.079 Uiso 1 1 calc R . .
H54C H 0.3152 0.1968 0.5997 0.079 Uiso 1 1 calc R . .
C55 C 0.6213(2) 0.37923(18) 0.24379(10) 0.0746(9) Uani 1 1 d . . .
H55A H 0.6482 0.4218 0.2568 0.112 Uiso 1 1 calc R . .
H55B H 0.6549 0.3379 0.2520 0.112 Uiso 1 1 calc R . .
H55C H 0.5703 0.3737 0.2564 0.112 Uiso 1 1 calc R . .
C56 C 0.5672(3) 0.29886(18) 0.15604(15) 0.1082(15) Uani 1 1 d . . .
H56A H 0.5156 0.2884 0.1667 0.162 Uiso 1 1 calc R . .
H56B H 0.6059 0.2626 0.1676 0.162 Uiso 1 1 calc R . .
H56C H 0.5616 0.2994 0.1220 0.162 Uiso 1 1 calc R . .
C57 C 0.7038(2) 0.3996(2) 0.15860(13) 0.0842(11) Uani 1 1 d . . .
H57A H 0.6985 0.3998 0.1245 0.126 Uiso 1 1 calc R . .
H57B H 0.7388 0.3609 0.1704 0.126 Uiso 1 1 calc R . .
H57C H 0.7266 0.4446 0.1703 0.126 Uiso 1 1 calc R . .
C58 C 0.4403(2) 0.4220(2) 0.07478(11) 0.0816(10) Uani 1 1 d . . .
H58A H 0.4740 0.3830 0.0665 0.122 Uiso 1 1 calc R . .
H58B H 0.4170 0.4460 0.0464 0.122 Uiso 1 1 calc R . .
H58C H 0.3976 0.4035 0.0915 0.122 Uiso 1 1 calc R . .
C59 C 0.5779(2) 0.52339(18) 0.07712(10) 0.0696(9) Uani 1 1 d . . .
H59A H 0.6099 0.5592 0.0952 0.104 Uiso 1 1 calc R . .
H59B H 0.5507 0.5449 0.0489 0.104 Uiso 1 1 calc R . .
H59C H 0.6127 0.4853 0.0686 0.104 Uiso 1 1 calc R . .
C60 C 0.43204(18) 0.56126(17) 0.12241(10) 0.0617(8) Uani 1 1 d . . .
H60A H 0.3893 0.5439 0.1396 0.093 Uiso 1 1 calc R . .
H60B H 0.4090 0.5800 0.0923 0.093 Uiso 1 1 calc R . .
H60C H 0.4614 0.5988 0.1403 0.093 Uiso 1 1 calc R . .
C61 C 0.34838(16) 0.63597(16) 0.24668(10) 0.0595(7) Uani 1 1 d . . .
H61A H 0.3370 0.6103 0.2173 0.089 Uiso 1 1 calc R . .
H61B H 0.3016 0.6639 0.2524 0.089 Uiso 1 1 calc R . .
H61C H 0.3609 0.6022 0.2721 0.089 Uiso 1 1 calc R . .
C62 C 0.4051(2) 0.75844(17) 0.19371(11) 0.0730(9) Uani 1 1 d . . .
H62A H 0.4444 0.7964 0.1936 0.110 Uiso 1 1 calc R . .
H62B H 0.3528 0.7787 0.1974 0.110 Uiso 1 1 calc R . .
H62C H 0.4020 0.7325 0.1643 0.110 Uiso 1 1 calc R . .
C63 C 0.4445(2) 0.75158(19) 0.29758(11) 0.0771(9) Uani 1 1 d . . .
H63A H 0.4556 0.7210 0.3248 0.116 Uiso 1 1 calc R . .
H63B H 0.3945 0.7770 0.2994 0.116 Uiso 1 1 calc R . .
H63C H 0.4881 0.7855 0.2968 0.116 Uiso 1 1 calc R . .
C64 C 0.67474(18) 0.59425(16) 0.22634(12) 0.0684(8) Uani 1 1 d . . .
H64A H 0.6792 0.5689 0.2560 0.103 Uiso 1 1 calc R . .
H64B H 0.7278 0.6092 0.2197 0.103 Uiso 1 1 calc R . .
H64C H 0.6512 0.5631 0.2015 0.103 Uiso 1 1 calc R . .
C65 C 0.6617(2) 0.7280(2) 0.27848(17) 0.1192(18) Uani 1 1 d . . .
H65A H 0.6392 0.7757 0.2774 0.179 Uiso 1 1 calc R . .
H65B H 0.7187 0.7306 0.2752 0.179 Uiso 1 1 calc R . .
H65C H 0.6544 0.7060 0.3083 0.179 Uiso 1 1 calc R . .
C66 C 0.6154(3) 0.7237(2) 0.17432(16) 0.1136(16) Uani 1 1 d . . .
H66A H 0.5891 0.6964 0.1482 0.170 Uiso 1 1 calc R . .
H66B H 0.6714 0.7312 0.1698 0.170 Uiso 1 1 calc R . .
H66C H 0.5887 0.7694 0.1760 0.170 Uiso 1 1 calc R . .
C67 C 0.4164(2) 0.54352(18) 0.38049(11) 0.0747(9) Uani 1 1 d . . .
H67A H 0.4102 0.5890 0.3643 0.112 Uiso 1 1 calc R . .
H67B H 0.4436 0.5507 0.4119 0.112 Uiso 1 1 calc R . .
H67C H 0.3638 0.5227 0.3824 0.112 Uiso 1 1 calc R . .
C68 C 0.57288(19) 0.53057(18) 0.34256(10) 0.0685(8) Uani 1 1 d . . .
H68A H 0.6088 0.5002 0.3272 0.103 Uiso 1 1 calc R . .
H68B H 0.5981 0.5430 0.3737 0.103 Uiso 1 1 calc R . .
H68C H 0.5618 0.5737 0.3243 0.103 Uiso 1 1 calc R . .
C69 C 0.5040(2) 0.40428(17) 0.38608(11) 0.0792(10) Uani 1 1 d . . .
H69A H 0.4555 0.3785 0.3911 0.119 Uiso 1 1 calc R . .
H69B H 0.5307 0.4206 0.4160 0.119 Uiso 1 1 calc R . .
H69C H 0.5398 0.3730 0.3713 0.119 Uiso 1 1 calc R . .
C70 C 0.3656(3) 0.3154(2) 0.2892(2) 0.1274(18) Uani 1 1 d . . .
H70A H 0.4083 0.2973 0.2723 0.191 Uiso 1 1 calc R . .
H70B H 0.3159 0.2906 0.2787 0.191 Uiso 1 1 calc R . .
H70C H 0.3795 0.3077 0.3226 0.191 Uiso 1 1 calc R . .
C71 C 0.2604(2) 0.4395(2) 0.30437(14) 0.0972(13) Uani 1 1 d . . .
H71A H 0.2693 0.4320 0.3381 0.146 Uiso 1 1 calc R . .
H71B H 0.2151 0.4108 0.2911 0.146 Uiso 1 1 calc R . .
H71C H 0.2491 0.4895 0.2979 0.146 Uiso 1 1 calc R . .
C72 C 0.3262(3) 0.4226(2) 0.21265(13) 0.1037(14) Uani 1 1 d . . .
H72A H 0.3158 0.4724 0.2050 0.155 Uiso 1 1 calc R . .
H72B H 0.2785 0.3947 0.2025 0.155 Uiso 1 1 calc R . .
H72C H 0.3707 0.4058 0.1968 0.155 Uiso 1 1 calc R . .
C73 C 0.5309(8) 0.9439(4) 0.2484(2) 0.301(7) Uani 1 1 d D . .
H73A H 0.4805 0.9268 0.2578 0.452 Uiso 1 1 calc R . .
H73B H 0.5754 0.9247 0.2694 0.452 Uiso 1 1 calc R . .
H73C H 0.5357 0.9285 0.2165 0.452 Uiso 1 1 calc R . .
C74 C 0.5325(5) 1.0115(3) 0.25029(13) 0.230(6) Uani 1 1 d GD . .
C75 C 0.4609(4) 1.0397(5) 0.26083(12) 0.315(9) Uani 1 1 d G . .
H75 H 0.4186 1.0093 0.2669 0.378 Uiso 1 1 calc R . .
C76 C 0.4511(3) 1.1125(5) 0.26257(13) 0.254(7) Uani 1 1 d G . .
H76 H 0.4021 1.1318 0.2698 0.304 Uiso 1 1 calc R . .
C77 C 0.5130(4) 1.1570(3) 0.25375(14) 0.181(3) Uani 1 1 d G . .
H77 H 0.5063 1.2068 0.2549 0.217 Uiso 1 1 calc R . .
C78 C 0.5846(3) 1.1288(3) 0.24321(12) 0.145(2) Uani 1 1 d G . .
H78 H 0.6269 1.1592 0.2372 0.174 Uiso 1 1 calc R . .
C79 C 0.5944(3) 1.0560(3) 0.24147(11) 0.154(3) Uani 1 1 d G . .
H79 H 0.6434 1.0367 0.2343 0.184 Uiso 1 1 calc R . .
 
loop_
 _atom_site_aniso_label
 _atom_site_aniso_U_11
 _atom_site_aniso_U_22
 _atom_site_aniso_U_33
 _atom_site_aniso_U_23
 _atom_site_aniso_U_13
 _atom_site_aniso_U_12
Sr 0.05433(14) 0.03487(12) 0.03404(11) 0.00025(9) 0.01657(9) -0.00378(10)
K1 0.0585(5) 0.0269(4) 0.1092(8) 0.0049(4) 0.0266(5) 0.0032(3)
K2 0.0616(6) 0.0712(6) 0.0680(6) 0.0161(5) -0.0140(5) 0.0260(5)
Si1 0.0736(5) 0.0405(4) 0.0493(4) -0.0011(3) 0.0194(4) 0.0118(4)
Si2 0.0446(4) 0.0547(4) 0.0324(3) -0.0052(3) 0.0073(3) -0.0065(3)
Si3 0.0555(4) 0.0414(4) 0.0367(3) 0.0002(3) 0.0090(3) 0.0054(3)
Si4 0.0541(4) 0.0412(4) 0.0585(4) -0.0047(3) 0.0169(3) -0.0101(3)
Si5 0.0704(5) 0.0543(4) 0.0393(4) 0.0159(3) 0.0214(3) 0.0175(4)
Si6 0.0791(6) 0.0663(6) 0.0761(6) 0.0120(4) 0.0292(5) -0.0204(5)
N1 0.0325(9) 0.0308(9) 0.0322(9) 0.0012(7) 0.0026(7) 0.0048(7)
N2 0.0328(9) 0.0320(9) 0.0319(9) -0.0028(7) 0.0021(7) 0.0026(7)
N3 0.0301(9) 0.0297(9) 0.0489(11) 0.0058(8) 0.0044(8) -0.0006(7)
N4 0.0276(9) 0.0293(9) 0.0394(10) 0.0004(7) 0.0025(7) 0.0023(7)
N5 0.0459(11) 0.0382(10) 0.0373(10) -0.0035(8) 0.0104(8) -0.0040(9)
N6 0.0483(11) 0.0367(10) 0.0353(10) 0.0018(8) 0.0086(8) -0.0006(9)
N7 0.0608(14) 0.0498(12) 0.0472(12) 0.0125(10) 0.0209(10) 0.0017(10)
C1 0.0337(11) 0.0306(11) 0.0344(11) -0.0014(9) 0.0021(9) 0.0034(9)
C2 0.0430(13) 0.0406(12) 0.0310(11) 0.0039(9) -0.0009(10) 0.0063(10)
C3 0.0412(13) 0.0396(12) 0.0345(12) 0.0044(9) 0.0002(10) 0.0119(10)
C4 0.0321(11) 0.0386(12) 0.0320(11) 0.0001(9) 0.0019(9) 0.0102(9)
C5 0.0332(12) 0.0416(13) 0.0405(12) -0.0041(10) 0.0015(9) 0.0092(10)
C6 0.0427(14) 0.0551(15) 0.0439(14) -0.0128(11) 0.0014(11) 0.0081(12)
C7 0.0470(15) 0.0662(17) 0.0373(13) -0.0038(12) 0.0049(11) 0.0154(13)
C8 0.0425(14) 0.0557(15) 0.0407(13) 0.0079(11) 0.0102(10) 0.0089(12)
C9 0.0363(12) 0.0424(13) 0.0384(12) 0.0037(10) 0.0046(10) 0.0077(10)
C10 0.0403(13) 0.0440(13) 0.0506(14) -0.0088(11) 0.0054(11) 0.0003(11)
C11 0.0404(16) 0.087(2) 0.085(2) -0.0011(18) -0.0011(15) -0.0062(15)
C12 0.071(2) 0.0503(17) 0.082(2) 0.0047(15) 0.0137(16) 0.0034(15)
C13 0.0498(15) 0.0474(14) 0.0517(15) 0.0000(12) 0.0159(12) -0.0052(12)
C14 0.0554(18) 0.080(2) 0.080(2) -0.0146(17) 0.0110(16) -0.0171(16)
C15 0.085(2) 0.0463(16) 0.087(2) 0.0032(15) 0.0291(18) 0.0026(15)
C16 0.0373(12) 0.0416(13) 0.0327(11) -0.0072(9) 0.0008(9) 0.0086(10)
C17 0.0465(14) 0.0407(13) 0.0491(14) -0.0133(11) -0.0020(11) 0.0071(11)
C18 0.0594(18) 0.0500(16) 0.081(2) -0.0269(14) -0.0058(15) 0.0172(14)
C19 0.0523(18) 0.080(2) 0.083(2) -0.0370(18) -0.0036(15) 0.0268(16)
C20 0.0385(14) 0.085(2) 0.0611(18) -0.0225(15) 0.0042(12) 0.0088(14)
C21 0.0383(13) 0.0594(15) 0.0361(12) -0.0075(11) 0.0017(10) 0.0048(11)
C22 0.0515(16) 0.0342(13) 0.0724(18) -0.0119(12) 0.0006(13) 0.0021(11)
C23 0.081(2) 0.0592(18) 0.0556(17) -0.0032(14) 0.0018(15) -0.0028(16)
C24 0.0615(19) 0.068(2) 0.085(2) 0.0197(17) -0.0209(17) -0.0136(16)
C25 0.0407(14) 0.0638(17) 0.0551(16) 0.0056(13) 0.0052(12) -0.0070(12)
C26 0.0684(19) 0.0566(17) 0.0647(18) -0.0121(14) 0.0115(15) -0.0157(15)
C27 0.069(2) 0.124(3) 0.067(2) 0.005(2) 0.0123(17) -0.034(2)
C28 0.0294(11) 0.0297(11) 0.0421(12) 0.0018(9) 0.0048(9) 0.0011(9)
C29 0.0423(14) 0.0276(11) 0.0623(16) 0.0092(10) 0.0035(11) 0.0018(10)
C30 0.0362(12) 0.0325(12) 0.0526(14) 0.0056(10) 0.0002(10) 0.0086(10)
C31 0.0290(12) 0.0308(11) 0.0635(16) 0.0094(10) 0.0060(11) -0.0041(9)
C32 0.0341(13) 0.0373(13) 0.0748(18) 0.0083(12) -0.0022(12) -0.0058(10)
C33 0.0365(15) 0.0572(17) 0.093(2) 0.0148(16) -0.0052(15) -0.0077(13)
C34 0.0296(14) 0.068(2) 0.116(3) 0.0275(19) 0.0085(17) -0.0047(13)
C35 0.0420(15) 0.0612(18) 0.090(2) 0.0223(16) 0.0281(15) 0.0024(13)
C36 0.0379(13) 0.0406(13) 0.0706(18) 0.0144(12) 0.0161(12) -0.0007(11)
C37 0.0416(14) 0.0490(15) 0.0662(17) -0.0065(13) -0.0091(12) -0.0023(12)
C38 0.075(3) 0.063(3) 0.058(2) 0.0006(18) 0.007(2) -0.001(2)
C39 0.076(3) 0.073(3) 0.109(4) -0.036(3) -0.004(3) -0.016(2)
C40 0.0472(15) 0.0589(17) 0.0571(16) 0.0131(13) 0.0196(12) 0.0018(12)
C41 0.095(3) 0.066(2) 0.070(2) 0.0063(16) 0.0081(18) 0.0084(18)
C42 0.080(2) 0.079(2) 0.092(2) 0.043(2) 0.0141(19) 0.0028(18)
C43 0.0242(10) 0.0310(11) 0.0415(12) -0.0026(9) 0.0042(9) 0.0026(8)
C44 0.0264(11) 0.0430(13) 0.0431(13) -0.0052(10) 0.0042(9) 0.0026(9)
C45 0.0326(12) 0.0489(14) 0.0552(15) -0.0139(12) 0.0003(11) -0.0024(11)
C46 0.0358(13) 0.0420(13) 0.0650(17) -0.0044(12) 0.0111(11) -0.0074(11)
C47 0.0366(13) 0.0428(13) 0.0492(14) 0.0010(11) 0.0123(10) 0.0005(10)
C48 0.0301(11) 0.0322(11) 0.0417(12) -0.0027(9) 0.0050(9) 0.0053(9)
C49 0.0412(14) 0.0637(17) 0.0416(13) -0.0080(12) 0.0033(11) -0.0037(12)
C50 0.0553(17) 0.091(2) 0.0488(16) -0.0048(15) -0.0001(13) 0.0057(16)
C51 0.0581(18) 0.104(3) 0.0576(18) -0.0076(17) 0.0154(14) 0.0116(18)
C52 0.0385(13) 0.0466(13) 0.0402(13) -0.0056(10) 0.0060(10) 0.0024(10)
C53 0.0579(17) 0.0599(17) 0.0469(15) -0.0012(12) -0.0025(12) 0.0066(13)
C54 0.0599(17) 0.0485(15) 0.0492(15) -0.0113(12) 0.0077(12) 0.0068(13)
C55 0.096(2) 0.073(2) 0.0569(18) 0.0162(15) 0.0189(17) 0.0370(19)
C56 0.172(5) 0.0451(19) 0.109(3) -0.0122(19) 0.024(3) 0.004(2)
C57 0.078(2) 0.098(3) 0.082(2) 0.0172(19) 0.0304(18) 0.040(2)
C58 0.077(2) 0.106(3) 0.0603(19) -0.0289(18) 0.0006(16) -0.021(2)
C59 0.075(2) 0.084(2) 0.0531(17) 0.0150(15) 0.0239(15) -0.0078(17)
C60 0.0609(18) 0.078(2) 0.0449(15) 0.0068(14) -0.0005(13) 0.0167(15)
C61 0.0489(16) 0.0690(19) 0.0609(17) 0.0072(14) 0.0075(13) 0.0067(14)
C62 0.090(2) 0.0618(19) 0.069(2) 0.0212(15) 0.0147(17) 0.0238(17)
C63 0.087(2) 0.081(2) 0.066(2) -0.0278(17) 0.0198(17) 0.0090(18)
C64 0.0513(17) 0.0647(19) 0.092(2) -0.0017(16) 0.0201(16) -0.0022(14)
C65 0.076(3) 0.128(4) 0.156(4) -0.087(3) 0.026(3) -0.038(2)
C66 0.099(3) 0.113(3) 0.141(4) 0.071(3) 0.068(3) 0.010(2)
C67 0.099(3) 0.075(2) 0.0544(17) 0.0102(15) 0.0264(17) 0.0302(19)
C68 0.073(2) 0.088(2) 0.0445(16) 0.0071(15) 0.0058(14) 0.0059(17)
C69 0.115(3) 0.067(2) 0.0584(18) 0.0239(15) 0.0236(18) 0.033(2)
C70 0.144(4) 0.064(2) 0.183(5) 0.008(3) 0.054(4) -0.029(3)
C71 0.073(2) 0.120(3) 0.104(3) 0.026(2) 0.032(2) -0.016(2)
C72 0.103(3) 0.127(4) 0.081(3) -0.012(2) 0.011(2) -0.062(3)
C73 0.68(2) 0.120(5) 0.079(4) 0.005(4) -0.081(7) -0.102(9)
C74 0.468(17) 0.172(7) 0.038(3) -0.006(3) -0.014(5) -0.160(9)
C75 0.391(18) 0.51(2) 0.035(3) -0.029(7) -0.039(6) 0.151(15)
C76 0.113(5) 0.58(2) 0.067(4) 0.078(7) 0.004(3) -0.047(8)
C77 0.163(6) 0.296(10) 0.078(4) 0.018(5) -0.006(4) 0.052(8)
C78 0.171(6) 0.193(7) 0.070(3) -0.024(4) 0.009(3) -0.026(5)
C79 0.225(7) 0.172(6) 0.062(3) -0.015(3) 0.007(3) -0.076(6)
 
_geom_special_details
;
 All esds (except the esd in the dihedral angle between two l.s. planes)
 are estimated using the full covariance matrix.  The cell esds are taken
 into account individually in the estimation of esds in distances, angles
 and torsion angles; correlations between esds in cell parameters are only
 used when they are defined by crystal symmetry.  An approximate (isotropic)
 treatment of cell esds is used for estimating esds involving l.s. planes.
;
 
loop_
 _geom_bond_atom_site_label_1
 _geom_bond_atom_site_label_2
 _geom_bond_distance
 _geom_bond_site_symmetry_2
 _geom_bond_publ_flag
Sr N7 2.468(2) . ?
Sr N6 2.4701(19) . ?
Sr N5 2.4727(18) . ?
Sr Si5 3.4815(7) . ?
Sr Si2 3.5026(7) . ?
Sr Si4 3.5035(7) . ?
Sr Si1 3.5304(7) . ?
Sr Si3 3.5360(7) . ?
Sr Si6 3.5406(8) . ?
K1 C28 2.810(2) . ?
K1 C28 2.810(2) 3_656 ?
K1 C43 3.103(2) 3_656 ?
K1 C43 3.103(2) . ?
K1 C48 3.277(2) 3_656 ?
K1 C48 3.277(2) . ?
K1 C44 3.402(2) . ?
K1 C44 3.402(2) 3_656 ?
K1 N4 3.4041(17) 3_656 ?
K1 N4 3.4041(17) . ?
K2 C1 2.827(2) 3_566 ?
K2 C1 2.827(2) . ?
K2 C16 3.179(2) 3_566 ?
K2 C16 3.179(2) . ?
K2 C17 3.419(2) 3_566 ?
K2 C17 3.419(2) . ?
K2 C21 3.445(2) 3_566 ?
K2 C21 3.445(2) . ?
K2 N2 3.4509(17) 3_566 ?
K2 N2 3.4509(17) . ?
Si1 N5 1.674(2) . ?
Si1 C57 1.877(3) . ?
Si1 C56 1.877(4) . ?
Si1 C55 1.880(3) . ?
Si2 N5 1.679(2) . ?
Si2 C59 1.874(3) . ?
Si2 C58 1.881(3) . ?
Si2 C60 1.888(3) . ?
Si3 N6 1.677(2) . ?
Si3 C61 1.878(3) . ?
Si3 C63 1.879(3) . ?
Si3 C62 1.883(3) . ?
Si4 N6 1.677(2) . ?
Si4 C64 1.874(3) . ?
Si4 C66 1.875(4) . ?
Si4 C65 1.879(4) . ?
Si5 N7 1.678(2) . ?
Si5 C68 1.878(3) . ?
Si5 C69 1.878(3) . ?
Si5 C67 1.881(3) . ?
Si6 N7 1.676(2) . ?
Si6 C71 1.882(4) . ?
Si6 C70 1.885(4) . ?
Si6 C72 1.889(4) . ?
N1 C1 1.357(3) . ?
N1 C3 1.387(3) . ?
N1 C4 1.445(3) . ?
N2 C1 1.367(3) . ?
N2 C2 1.382(3) . ?
N2 C16 1.448(3) . ?
N3 C28 1.356(3) . ?
N3 C29 1.387(3) . ?
N3 C31 1.447(3) . ?
N4 C28 1.367(3) . ?
N4 C30 1.388(3) . ?
N4 C43 1.443(3) . ?
C2 C3 1.341(3) . ?
C2 H2 0.9500 . ?
C3 H3 0.9500 . ?
C4 C9 1.394(3) . ?
C4 C5 1.400(3) . ?
C5 C6 1.391(3) . ?
C5 C10 1.515(3) . ?
C6 C7 1.375(4) . ?
C6 H6 0.9500 . ?
C7 C8 1.384(4) . ?
C7 H7 0.9500 . ?
C8 C9 1.399(3) . ?
C8 H8 0.9500 . ?
C9 C13 1.514(3) . ?
C10 C11 1.527(4) . ?
C10 C12 1.527(4) . ?
C10 H10 1.0000 . ?
C11 H11A 0.9800 . ?
C11 H11B 0.9800 . ?
C11 H11C 0.9800 . ?
C12 H12A 0.9800 . ?
C12 H12B 0.9800 . ?
C12 H12C 0.9800 . ?
C13 C15 1.526(4) . ?
C13 C14 1.528(4) . ?
C13 H13 1.0000 . ?
C14 H14A 0.9800 . ?
C14 H14B 0.9800 . ?
C14 H14C 0.9800 . ?
C15 H15A 0.9800 . ?
C15 H15B 0.9800 . ?
C15 H15C 0.9800 . ?
C16 C21 1.400(3) . ?
C16 C17 1.401(3) . ?
C17 C18 1.397(3) . ?
C17 C22 1.517(4) . ?
C18 C19 1.379(4) . ?
C18 H18 0.9500 . ?
C19 C20 1.375(4) . ?
C19 H19 0.9500 . ?
C20 C21 1.397(4) . ?
C20 H20 0.9500 . ?
C21 C25 1.517(4) . ?
C22 C24 1.523(4) . ?
C22 C23 1.525(4) . ?
C22 H22 1.0000 . ?
C23 H23A 0.9800 . ?
C23 H23B 0.9800 . ?
C23 H23C 0.9800 . ?
C24 H24A 0.9800 . ?
C24 H24B 0.9800 . ?
C24 H24C 0.9800 . ?
C25 C26 1.524(4) . ?
C25 C27 1.529(4) . ?
C25 H25 1.0000 . ?
C26 H26A 0.9800 . ?
C26 H26B 0.9800 . ?
C26 H26C 0.9800 . ?
C27 H27A 0.9800 . ?
C27 H27B 0.9800 . ?
C27 H27C 0.9800 . ?
C29 C30 1.344(3) . ?
C29 H29 0.9500 . ?
C30 H30 0.9500 . ?
C31 C36 1.390(4) . ?
C31 C32 1.398(4) . ?
C32 C33 1.395(4) . ?
C32 C37 1.517(4) . ?
C33 C34 1.370(5) . ?
C33 H33 0.9500 . ?
C34 C35 1.369(5) . ?
C34 H34 0.9500 . ?
C35 C36 1.402(4) . ?
C35 H35 0.9500 . ?
C36 C40 1.519(4) . ?
C37 C38A 1.457(18) . ?
C37 C39A 1.51(2) . ?
C37 C38 1.538(5) . ?
C37 C39 1.542(5) . ?
C37 H37 1.0000 . ?
C38 H38A 0.9800 . ?
C38 H38B 0.9800 . ?
C38 H38C 0.9800 . ?
C39 H39A 0.9800 . ?
C39 H39B 0.9800 . ?
C39 H39C 0.9800 . ?
C38A H38D 0.9800 . ?
C38A H38E 0.9800 . ?
C38A H38F 0.9800 . ?
C39A H39D 0.9800 . ?
C39A H39E 0.9800 . ?
C39A H39F 0.9800 . ?
C40 C41 1.515(4) . ?
C40 C42 1.532(4) . ?
C40 H40 1.0000 . ?
C41 H41A 0.9800 . ?
C41 H41B 0.9800 . ?
C41 H41C 0.9800 . ?
C42 H42A 0.9800 . ?
C42 H42B 0.9800 . ?
C42 H42C 0.9800 . ?
C43 C44 1.394(3) . ?
C43 C48 1.402(3) . ?
C44 C45 1.397(3) . ?
C44 C49 1.526(3) . ?
C45 C46 1.381(4) . ?
C45 H45 0.9500 . ?
C46 C47 1.386(3) . ?
C46 H46 0.9500 . ?
C47 C48 1.393(3) . ?
C47 H47 0.9500 . ?
C48 C52 1.527(3) . ?
C49 C50 1.517(4) . ?
C49 C51 1.517(4) . ?
C49 H49 1.0000 . ?
C50 H50A 0.9800 . ?
C50 H50B 0.9800 . ?
C50 H50C 0.9800 . ?
C51 H51A 0.9800 . ?
C51 H51B 0.9800 . ?
C51 H51C 0.9800 . ?
C52 C53 1.527(3) . ?
C52 C54 1.529(3) . ?
C52 H52 1.0000 . ?
C53 H53A 0.9800 . ?
C53 H53B 0.9800 . ?
C53 H53C 0.9800 . ?
C54 H54A 0.9800 . ?
C54 H54B 0.9800 . ?
C54 H54C 0.9800 . ?
C55 H55A 0.9800 . ?
C55 H55B 0.9800 . ?
C55 H55C 0.9800 . ?
C56 H56A 0.9800 . ?
C56 H56B 0.9800 . ?
C56 H56C 0.9800 . ?
C57 H57A 0.9800 . ?
C57 H57B 0.9800 . ?
C57 H57C 0.9800 . ?
C58 H58A 0.9800 . ?
C58 H58B 0.9800 . ?
C58 H58C 0.9800 . ?
C59 H59A 0.9800 . ?
C59 H59B 0.9800 . ?
C59 H59C 0.9800 . ?
C60 H60A 0.9800 . ?
C60 H60B 0.9800 . ?
C60 H60C 0.9800 . ?
C61 H61A 0.9800 . ?
C61 H61B 0.9800 . ?
C61 H61C 0.9800 . ?
C62 H62A 0.9800 . ?
C62 H62B 0.9800 . ?
C62 H62C 0.9800 . ?
C63 H63A 0.9800 . ?
C63 H63B 0.9800 . ?
C63 H63C 0.9800 . ?
C64 H64A 0.9800 . ?
C64 H64B 0.9800 . ?
C64 H64C 0.9800 . ?
C65 H65A 0.9800 . ?
C65 H65B 0.9800 . ?
C65 H65C 0.9800 . ?
C66 H66A 0.9800 . ?
C66 H66B 0.9800 . ?
C66 H66C 0.9800 . ?
C67 H67A 0.9800 . ?
C67 H67B 0.9800 . ?
C67 H67C 0.9800 . ?
C68 H68A 0.9800 . ?
C68 H68B 0.9800 . ?
C68 H68C 0.9800 . ?
C69 H69A 0.9800 . ?
C69 H69B 0.9800 . ?
C69 H69C 0.9800 . ?
C70 H70A 0.9800 . ?
C70 H70B 0.9800 . ?
C70 H70C 0.9800 . ?
C71 H71A 0.9800 . ?
C71 H71B 0.9800 . ?
C71 H71C 0.9800 . ?
C72 H72A 0.9800 . ?
C72 H72B 0.9800 . ?
C72 H72C 0.9800 . ?
C73 C74 1.282(7) . ?
C73 H73A 0.9800 . ?
C73 H73B 0.9800 . ?
C73 H73C 0.9800 . ?
C74 C75 1.3900 . ?
C74 C79 1.3900 . ?
C75 C76 1.3900 . ?
C75 H75 0.9500 . ?
C76 C77 1.3900 . ?
C76 H76 0.9500 . ?
C77 C78 1.3900 . ?
C77 H77 0.9500 . ?
C78 C79 1.3900 . ?
C78 H78 0.9500 . ?
C79 H79 0.9500 . ?
 
loop_
 _geom_angle_atom_site_label_1
 _geom_angle_atom_site_label_2
 _geom_angle_atom_site_label_3
 _geom_angle
 _geom_angle_site_symmetry_1
 _geom_angle_site_symmetry_3
 _geom_angle_publ_flag
N7 Sr N6 117.59(7) . . ?
N7 Sr N5 122.88(7) . . ?
N6 Sr N5 119.53(6) . . ?
N7 Sr Si5 26.36(6) . . ?
N6 Sr Si5 99.44(4) . . ?
N5 Sr Si5 136.17(5) . . ?
N7 Sr Si2 134.95(6) . . ?
N6 Sr Si2 102.68(4) . . ?
N5 Sr Si2 26.03(5) . . ?
Si5 Sr Si2 157.879(19) . . ?
N7 Sr Si4 131.79(6) . . ?
N6 Sr Si4 25.96(5) . . ?
N5 Sr Si4 101.24(5) . . ?
Si5 Sr Si4 107.10(2) . . ?
Si2 Sr Si4 93.229(18) . . ?
N7 Sr Si1 106.75(5) . . ?
N6 Sr Si1 130.67(5) . . ?
N5 Sr Si1 25.37(5) . . ?
Si5 Sr Si1 112.646(18) . . ?
Si2 Sr Si1 51.392(18) . . ?
Si4 Sr Si1 106.059(19) . . ?
N7 Sr Si3 101.41(5) . . ?
N6 Sr Si3 25.31(5) . . ?
N5 Sr Si3 131.70(5) . . ?
Si5 Sr Si3 92.091(17) . . ?
Si2 Sr Si3 107.753(17) . . ?
Si4 Sr Si3 51.227(18) . . ?
Si1 Sr Si3 151.794(18) . . ?
N7 Sr Si6 25.16(6) . . ?
N6 Sr Si6 129.58(5) . . ?
N5 Sr Si6 106.72(5) . . ?
Si5 Sr Si6 51.48(2) . . ?
Si2 Sr Si6 111.55(2) . . ?
Si4 Sr Si6 152.02(2) . . ?
Si1 Sr Si6 99.73(2) . . ?
Si3 Sr Si6 106.50(2) . . ?
C28 K1 C28 180.0 . 3_656 ?
C28 K1 C43 131.95(6) . 3_656 ?
C28 K1 C43 48.05(6) 3_656 3_656 ?
C28 K1 C43 48.05(6) . . ?
C28 K1 C43 131.95(6) 3_656 . ?
C43 K1 C43 180.0 3_656 . ?
C28 K1 C48 117.25(6) . 3_656 ?
C28 K1 C48 62.75(6) 3_656 3_656 ?
C43 K1 C48 25.19(5) 3_656 3_656 ?
C43 K1 C48 154.81(5) . 3_656 ?
C28 K1 C48 62.75(6) . . ?
C28 K1 C48 117.25(6) 3_656 . ?
C43 K1 C48 154.81(5) 3_656 . ?
C43 K1 C48 25.19(5) . . ?
C48 K1 C48 180.000(1) 3_656 . ?
C28 K1 C44 62.46(6) . . ?
C28 K1 C44 117.54(6) 3_656 . ?
C43 K1 C44 155.82(5) 3_656 . ?
C43 K1 C44 24.18(5) . . ?
C48 K1 C44 136.85(5) 3_656 . ?
C48 K1 C44 43.15(5) . . ?
C28 K1 C44 117.54(6) . 3_656 ?
C28 K1 C44 62.46(6) 3_656 3_656 ?
C43 K1 C44 24.18(5) 3_656 3_656 ?
C43 K1 C44 155.82(5) . 3_656 ?
C48 K1 C44 43.15(5) 3_656 3_656 ?
C48 K1 C44 136.85(5) . 3_656 ?
C44 K1 C44 180.00(7) . 3_656 ?
C28 K1 N4 157.03(5) . 3_656 ?
C28 K1 N4 22.97(5) 3_656 3_656 ?
C43 K1 N4 25.09(5) 3_656 3_656 ?
C43 K1 N4 154.91(5) . 3_656 ?
C48 K1 N4 42.78(5) 3_656 3_656 ?
C48 K1 N4 137.22(5) . 3_656 ?
C44 K1 N4 138.06(5) . 3_656 ?
C44 K1 N4 41.94(5) 3_656 3_656 ?
C28 K1 N4 22.97(5) . . ?
C28 K1 N4 157.03(5) 3_656 . ?
C43 K1 N4 154.91(5) 3_656 . ?
C43 K1 N4 25.09(5) . . ?
C48 K1 N4 137.22(5) 3_656 . ?
C48 K1 N4 42.78(5) . . ?
C44 K1 N4 41.94(5) . . ?
C44 K1 N4 138.06(5) 3_656 . ?
N4 K1 N4 180.0 3_656 . ?
C1 K2 C1 180.00(8) 3_566 . ?
C1 K2 C16 47.18(6) 3_566 3_566 ?
C1 K2 C16 132.82(6) . 3_566 ?
C1 K2 C16 132.82(6) 3_566 . ?
C1 K2 C16 47.18(6) . . ?
C16 K2 C16 180.0 3_566 . ?
C1 K2 C17 60.31(6) 3_566 3_566 ?
C1 K2 C17 119.69(6) . 3_566 ?
C16 K2 C17 24.17(6) 3_566 3_566 ?
C16 K2 C17 155.83(6) . 3_566 ?
C1 K2 C17 119.69(6) 3_566 . ?
C1 K2 C17 60.31(6) . . ?
C16 K2 C17 155.83(6) 3_566 . ?
C16 K2 C17 24.17(6) . . ?
C17 K2 C17 180.0 3_566 . ?
C1 K2 C21 62.43(6) 3_566 3_566 ?
C1 K2 C21 117.57(6) . 3_566 ?
C16 K2 C21 23.98(6) 3_566 3_566 ?
C16 K2 C21 156.02(6) . 3_566 ?
C17 K2 C21 42.10(6) 3_566 3_566 ?
C17 K2 C21 137.90(6) . 3_566 ?
C1 K2 C21 117.57(6) 3_566 . ?
C1 K2 C21 62.43(6) . . ?
C16 K2 C21 156.02(6) 3_566 . ?
C16 K2 C21 23.98(6) . . ?
C17 K2 C21 137.90(6) 3_566 . ?
C17 K2 C21 42.10(6) . . ?
C21 K2 C21 180.0 3_566 . ?
C1 K2 N2 22.47(5) 3_566 3_566 ?
C1 K2 N2 157.53(5) . 3_566 ?
C16 K2 N2 24.80(5) 3_566 3_566 ?
C16 K2 N2 155.20(5) . 3_566 ?
C17 K2 N2 41.59(5) 3_566 3_566 ?
C17 K2 N2 138.41(5) . 3_566 ?
C21 K2 N2 41.62(5) 3_566 3_566 ?
C21 K2 N2 138.38(5) . 3_566 ?
C1 K2 N2 157.53(5) 3_566 . ?
C1 K2 N2 22.47(5) . . ?
C16 K2 N2 155.20(5) 3_566 . ?
C16 K2 N2 24.80(5) . . ?
C17 K2 N2 138.41(5) 3_566 . ?
C17 K2 N2 41.59(5) . . ?
C21 K2 N2 138.38(5) 3_566 . ?
C21 K2 N2 41.62(5) . . ?
N2 K2 N2 180.0 3_566 . ?
N5 Si1 C57 114.39(13) . . ?
N5 Si1 C56 114.65(17) . . ?
C57 Si1 C56 105.6(2) . . ?
N5 Si1 C55 109.21(12) . . ?
C57 Si1 C55 105.82(16) . . ?
C56 Si1 C55 106.58(18) . . ?
N5 Si1 Sr 39.27(6) . . ?
C57 Si1 Sr 125.13(13) . . ?
C56 Si1 Sr 128.58(16) . . ?
C55 Si1 Sr 69.97(9) . . ?
N5 Si2 C59 115.02(13) . . ?
N5 Si2 C58 114.46(14) . . ?
C59 Si2 C58 106.62(16) . . ?
N5 Si2 C60 108.77(11) . . ?
C59 Si2 C60 106.30(15) . . ?
C58 Si2 C60 104.91(16) . . ?
N5 Si2 Sr 40.27(7) . . ?
C59 Si2 Sr 125.12(11) . . ?
C58 Si2 Sr 127.89(12) . . ?
C60 Si2 Sr 68.57(8) . . ?
N6 Si3 C61 109.45(12) . . ?
N6 Si3 C63 114.02(13) . . ?
C61 Si3 C63 106.43(15) . . ?
N6 Si3 C62 114.39(12) . . ?
C61 Si3 C62 105.77(15) . . ?
C63 Si3 C62 106.17(16) . . ?
N6 Si3 Sr 39.02(7) . . ?
C61 Si3 Sr 70.45(9) . . ?
C63 Si3 Sr 127.86(12) . . ?
C62 Si3 Sr 125.14(11) . . ?
N6 Si4 C64 109.63(12) . . ?
N6 Si4 C66 113.27(16) . . ?
C64 Si4 C66 105.72(17) . . ?
N6 Si4 C65 115.21(15) . . ?
C64 Si4 C65 104.68(19) . . ?
C66 Si4 C65 107.6(2) . . ?
N6 Si4 Sr 40.13(7) . . ?
C64 Si4 Sr 69.75(9) . . ?
C66 Si4 Sr 121.04(17) . . ?
C65 Si4 Sr 130.93(17) . . ?
N7 Si5 C68 109.75(12) . . ?
N7 Si5 C69 114.08(14) . . ?
C68 Si5 C69 106.09(16) . . ?
N7 Si5 C67 114.04(14) . . ?
C68 Si5 C67 105.34(16) . . ?
C69 Si5 C67 106.90(14) . . ?
N7 Si5 Sr 40.77(7) . . ?
C68 Si5 Sr 69.64(9) . . ?
C69 Si5 Sr 133.58(11) . . ?
C67 Si5 Sr 118.95(10) . . ?
N7 Si6 C71 114.96(16) . . ?
N7 Si6 C70 113.89(19) . . ?
C71 Si6 C70 106.1(2) . . ?
N7 Si6 C72 108.78(13) . . ?
C71 Si6 C72 106.1(2) . . ?
C70 Si6 C72 106.5(2) . . ?
N7 Si6 Sr 38.75(7) . . ?
C71 Si6 Sr 129.66(14) . . ?
C70 Si6 Sr 123.45(16) . . ?
C72 Si6 Sr 70.12(11) . . ?
C1 N1 C3 112.37(17) . . ?
C1 N1 C4 120.80(17) . . ?
C3 N1 C4 126.83(17) . . ?
C1 N2 C2 112.65(18) . . ?
C1 N2 C16 118.93(17) . . ?
C2 N2 C16 128.21(18) . . ?
C1 N2 K2 52.19(10) . . ?
C2 N2 K2 164.75(14) . . ?
C16 N2 K2 67.04(10) . . ?
C28 N3 C29 112.69(18) . . ?
C28 N3 C31 121.51(18) . . ?
C29 N3 C31 125.80(18) . . ?
C28 N4 C30 112.66(18) . . ?
C28 N4 C43 119.02(17) . . ?
C30 N4 C43 128.30(17) . . ?
C28 N4 K1 53.33(10) . . ?
C30 N4 K1 165.98(14) . . ?
C43 N4 K1 65.70(10) . . ?
Si1 N5 Si2 130.90(12) . . ?
Si1 N5 Sr 115.36(9) . . ?
Si2 N5 Sr 113.70(10) . . ?
Si3 N6 Si4 130.23(12) . . ?
Si3 N6 Sr 115.67(10) . . ?
Si4 N6 Sr 113.91(10) . . ?
Si6 N7 Si5 130.87(13) . . ?
Si6 N7 Sr 116.08(11) . . ?
Si5 N7 Sr 112.87(11) . . ?
N1 C1 N2 102.27(17) . . ?
N1 C1 K2 152.27(15) . . ?
N2 C1 K2 105.34(13) . . ?
C3 C2 N2 106.04(19) . . ?
C3 C2 H2 127.0 . . ?
N2 C2 H2 127.0 . . ?
C2 C3 N1 106.67(19) . . ?
C2 C3 H3 126.7 . . ?
N1 C3 H3 126.7 . . ?
C9 C4 C5 122.9(2) . . ?
C9 C4 N1 118.37(19) . . ?
C5 C4 N1 118.5(2) . . ?
C6 C5 C4 117.3(2) . . ?
C6 C5 C10 119.9(2) . . ?
C4 C5 C10 122.7(2) . . ?
C7 C6 C5 121.3(2) . . ?
C7 C6 H6 119.4 . . ?
C5 C6 H6 119.4 . . ?
C6 C7 C8 120.3(2) . . ?
C6 C7 H7 119.8 . . ?
C8 C7 H7 119.8 . . ?
C7 C8 C9 120.9(2) . . ?
C7 C8 H8 119.6 . . ?
C9 C8 H8 119.6 . . ?
C4 C9 C8 117.3(2) . . ?
C4 C9 C13 122.4(2) . . ?
C8 C9 C13 120.4(2) . . ?
C5 C10 C11 111.1(2) . . ?
C5 C10 C12 111.2(2) . . ?
C11 C10 C12 110.6(2) . . ?
C5 C10 H10 107.9 . . ?
C11 C10 H10 107.9 . . ?
C12 C10 H10 107.9 . . ?
C10 C11 H11A 109.5 . . ?
C10 C11 H11B 109.5 . . ?
H11A C11 H11B 109.5 . . ?
C10 C11 H11C 109.5 . . ?
H11A C11 H11C 109.5 . . ?
H11B C11 H11C 109.5 . . ?
C10 C12 H12A 109.5 . . ?
C10 C12 H12B 109.5 . . ?
H12A C12 H12B 109.5 . . ?
C10 C12 H12C 109.5 . . ?
H12A C12 H12C 109.5 . . ?
H12B C12 H12C 109.5 . . ?
C9 C13 C15 110.5(2) . . ?
C9 C13 C14 111.6(2) . . ?
C15 C13 C14 111.5(2) . . ?
C9 C13 H13 107.7 . . ?
C15 C13 H13 107.7 . . ?
C14 C13 H13 107.7 . . ?
C13 C14 H14A 109.5 . . ?
C13 C14 H14B 109.5 . . ?
H14A C14 H14B 109.5 . . ?
C13 C14 H14C 109.5 . . ?
H14A C14 H14C 109.5 . . ?
H14B C14 H14C 109.5 . . ?
C13 C15 H15A 109.5 . . ?
C13 C15 H15B 109.5 . . ?
H15A C15 H15B 109.5 . . ?
C13 C15 H15C 109.5 . . ?
H15A C15 H15C 109.5 . . ?
H15B C15 H15C 109.5 . . ?
C21 C16 C17 123.3(2) . . ?
C21 C16 N2 118.6(2) . . ?
C17 C16 N2 117.8(2) . . ?
C21 C16 K2 88.71(13) . . ?
C17 C16 K2 87.56(14) . . ?
N2 C16 K2 88.16(11) . . ?
C18 C17 C16 116.9(2) . . ?
C18 C17 C22 121.0(2) . . ?
C16 C17 C22 122.1(2) . . ?
C18 C17 K2 95.39(16) . . ?
C16 C17 K2 68.27(12) . . ?
C22 C17 K2 105.88(16) . . ?
C19 C18 C17 121.0(3) . . ?
C19 C18 H18 119.5 . . ?
C17 C18 H18 119.5 . . ?
C20 C19 C18 120.7(3) . . ?
C20 C19 H19 119.7 . . ?
C18 C19 H19 119.7 . . ?
C19 C20 C21 121.3(3) . . ?
C19 C20 H20 119.4 . . ?
C21 C20 H20 119.4 . . ?
C20 C21 C16 116.8(3) . . ?
C20 C21 C25 121.6(2) . . ?
C16 C21 C25 121.6(2) . . ?
C20 C21 K2 95.53(17) . . ?
C16 C21 K2 67.31(13) . . ?
C25 C21 K2 104.46(14) . . ?
C17 C22 C24 110.6(2) . . ?
C17 C22 C23 113.4(2) . . ?
C24 C22 C23 110.2(2) . . ?
C17 C22 H22 107.4 . . ?
C24 C22 H22 107.4 . . ?
C23 C22 H22 107.4 . . ?
C22 C23 H23A 109.5 . . ?
C22 C23 H23B 109.5 . . ?
H23A C23 H23B 109.5 . . ?
C22 C23 H23C 109.5 . . ?
H23A C23 H23C 109.5 . . ?
H23B C23 H23C 109.5 . . ?
C22 C24 H24A 109.5 . . ?
C22 C24 H24B 109.5 . . ?
H24A C24 H24B 109.5 . . ?
C22 C24 H24C 109.5 . . ?
H24A C24 H24C 109.5 . . ?
H24B C24 H24C 109.5 . . ?
C21 C25 C26 111.6(2) . . ?
C21 C25 C27 113.2(3) . . ?
C26 C25 C27 108.9(2) . . ?
C21 C25 H25 107.7 . . ?
C26 C25 H25 107.7 . . ?
C27 C25 H25 107.7 . . ?
C25 C26 H26A 109.5 . . ?
C25 C26 H26B 109.5 . . ?
H26A C26 H26B 109.5 . . ?
C25 C26 H26C 109.5 . . ?
H26A C26 H26C 109.5 . . ?
H26B C26 H26C 109.5 . . ?
C25 C27 H27A 109.5 . . ?
C25 C27 H27B 109.5 . . ?
H27A C27 H27B 109.5 . . ?
C25 C27 H27C 109.5 . . ?
H27A C27 H27C 109.5 . . ?
H27B C27 H27C 109.5 . . ?
N3 C28 N4 102.21(17) . . ?
N3 C28 K1 154.09(15) . . ?
N4 C28 K1 103.71(13) . . ?
C30 C29 N3 106.55(19) . . ?
C30 C29 H29 126.7 . . ?
N3 C29 H29 126.7 . . ?
C29 C30 N4 105.90(19) . . ?
C29 C30 H30 127.0 . . ?
N4 C30 H30 127.0 . . ?
C36 C31 C32 123.6(2) . . ?
C36 C31 N3 118.5(2) . . ?
C32 C31 N3 117.8(2) . . ?
C33 C32 C31 116.7(3) . . ?
C33 C32 C37 121.0(3) . . ?
C31 C32 C37 122.2(2) . . ?
C34 C33 C32 121.0(3) . . ?
C34 C33 H33 119.5 . . ?
C32 C33 H33 119.5 . . ?
C35 C34 C33 121.1(3) . . ?
C35 C34 H34 119.5 . . ?
C33 C34 H34 119.5 . . ?
C34 C35 C36 121.0(3) . . ?
C34 C35 H35 119.5 . . ?
C36 C35 H35 119.5 . . ?
C31 C36 C35 116.6(3) . . ?
C31 C36 C40 122.9(2) . . ?
C35 C36 C40 120.5(3) . . ?
C38A C37 C39A 114.7(12) . . ?
C38A C37 C32 107.2(8) . . ?
C39A C37 C32 100.5(8) . . ?
C39A C37 C38 142.3(9) . . ?
C32 C37 C38 111.5(2) . . ?
C38A C37 C39 78.7(9) . . ?
C32 C37 C39 114.9(3) . . ?
C38 C37 C39 109.2(3) . . ?
C38A C37 H37 138.5 . . ?
C39A C37 H37 81.0 . . ?
C32 C37 H37 107.0 . . ?
C38 C37 H37 107.0 . . ?
C39 C37 H37 107.0 . . ?
C37 C38 H38A 109.5 . . ?
C37 C38 H38B 109.5 . . ?
C37 C38 H38C 109.5 . . ?
C37 C39 H39A 109.5 . . ?
C37 C39 H39B 109.5 . . ?
C37 C39 H39C 109.5 . . ?
C37 C38A H38D 109.5 . . ?
C37 C38A H38E 109.5 . . ?
H38D C38A H38E 109.5 . . ?
C37 C38A H38F 109.5 . . ?
H38D C38A H38F 109.5 . . ?
H38E C38A H38F 109.5 . . ?
C37 C39A H39D 109.5 . . ?
C37 C39A H39E 109.5 . . ?
H39D C39A H39E 109.5 . . ?
C37 C39A H39F 109.5 . . ?
H39D C39A H39F 109.5 . . ?
H39E C39A H39F 109.5 . . ?
C41 C40 C36 111.2(2) . . ?
C41 C40 C42 110.8(3) . . ?
C36 C40 C42 111.4(2) . . ?
C41 C40 H40 107.7 . . ?
C36 C40 H40 107.7 . . ?
C42 C40 H40 107.7 . . ?
C40 C41 H41A 109.5 . . ?
C40 C41 H41B 109.5 . . ?
H41A C41 H41B 109.5 . . ?
C40 C41 H41C 109.5 . . ?
H41A C41 H41C 109.5 . . ?
H41B C41 H41C 109.5 . . ?
C40 C42 H42A 109.5 . . ?
C40 C42 H42B 109.5 . . ?
H42A C42 H42B 109.5 . . ?
C40 C42 H42C 109.5 . . ?
H42A C42 H42C 109.5 . . ?
H42B C42 H42C 109.5 . . ?
C44 C43 C48 123.2(2) . . ?
C44 C43 N4 118.32(19) . . ?
C48 C43 N4 118.08(18) . . ?
C44 C43 K1 90.05(13) . . ?
C48 C43 K1 84.37(12) . . ?
N4 C43 K1 89.21(11) . . ?
C43 C44 C45 117.2(2) . . ?
C43 C44 C49 121.2(2) . . ?
C45 C44 C49 121.4(2) . . ?
C43 C44 K1 65.77(11) . . ?
C45 C44 K1 94.28(14) . . ?
C49 C44 K1 105.54(14) . . ?
C46 C45 C44 121.1(2) . . ?
C46 C45 H45 119.4 . . ?
C44 C45 H45 119.4 . . ?
C45 C46 C47 120.3(2) . . ?
C45 C46 H46 119.9 . . ?
C47 C46 H46 119.9 . . ?
C46 C47 C48 121.1(2) . . ?
C46 C47 H47 119.5 . . ?
C48 C47 H47 119.5 . . ?
C47 C48 C43 117.1(2) . . ?
C47 C48 C52 121.7(2) . . ?
C43 C48 C52 121.1(2) . . ?
C47 C48 K1 94.51(13) . . ?
C43 C48 K1 70.44(11) . . ?
C52 C48 K1 104.34(13) . . ?
C50 C49 C51 111.1(2) . . ?
C50 C49 C44 113.7(2) . . ?
C51 C49 C44 110.4(2) . . ?
C50 C49 H49 107.1 . . ?
C51 C49 H49 107.1 . . ?
C44 C49 H49 107.1 . . ?
C49 C50 H50A 109.5 . . ?
C49 C50 H50B 109.5 . . ?
H50A C50 H50B 109.5 . . ?
C49 C50 H50C 109.5 . . ?
H50A C50 H50C 109.5 . . ?
H50B C50 H50C 109.5 . . ?
C49 C51 H51A 109.5 . . ?
C49 C51 H51B 109.5 . . ?
H51A C51 H51B 109.5 . . ?
C49 C51 H51C 109.5 . . ?
H51A C51 H51C 109.5 . . ?
H51B C51 H51C 109.5 . . ?
C53 C52 C48 113.8(2) . . ?
C53 C52 C54 110.4(2) . . ?
C48 C52 C54 109.86(19) . . ?
C53 C52 H52 107.5 . . ?
C48 C52 H52 107.5 . . ?
C54 C52 H52 107.5 . . ?
C52 C53 H53A 109.5 . . ?
C52 C53 H53B 109.5 . . ?
H53A C53 H53B 109.5 . . ?
C52 C53 H53C 109.5 . . ?
H53A C53 H53C 109.5 . . ?
H53B C53 H53C 109.5 . . ?
C52 C54 H54A 109.5 . . ?
C52 C54 H54B 109.5 . . ?
H54A C54 H54B 109.5 . . ?
C52 C54 H54C 109.5 . . ?
H54A C54 H54C 109.5 . . ?
H54B C54 H54C 109.5 . . ?
Si1 C55 H55A 109.5 . . ?
Si1 C55 H55B 109.5 . . ?
H55A C55 H55B 109.5 . . ?
Si1 C55 H55C 109.5 . . ?
H55A C55 H55C 109.5 . . ?
H55B C55 H55C 109.5 . . ?
Si1 C56 H56A 109.5 . . ?
Si1 C56 H56B 109.5 . . ?
H56A C56 H56B 109.5 . . ?
Si1 C56 H56C 109.5 . . ?
H56A C56 H56C 109.5 . . ?
H56B C56 H56C 109.5 . . ?
Si1 C57 H57A 109.5 . . ?
Si1 C57 H57B 109.5 . . ?
H57A C57 H57B 109.5 . . ?
Si1 C57 H57C 109.5 . . ?
H57A C57 H57C 109.5 . . ?
H57B C57 H57C 109.5 . . ?
Si2 C58 H58A 109.5 . . ?
Si2 C58 H58B 109.5 . . ?
H58A C58 H58B 109.5 . . ?
Si2 C58 H58C 109.5 . . ?
H58A C58 H58C 109.5 . . ?
H58B C58 H58C 109.5 . . ?
Si2 C59 H59A 109.5 . . ?
Si2 C59 H59B 109.5 . . ?
H59A C59 H59B 109.5 . . ?
Si2 C59 H59C 109.5 . . ?
H59A C59 H59C 109.5 . . ?
H59B C59 H59C 109.5 . . ?
Si2 C60 H60A 109.5 . . ?
Si2 C60 H60B 109.5 . . ?
H60A C60 H60B 109.5 . . ?
Si2 C60 H60C 109.5 . . ?
H60A C60 H60C 109.5 . . ?
H60B C60 H60C 109.5 . . ?
Si3 C61 H61A 109.5 . . ?
Si3 C61 H61B 109.5 . . ?
H61A C61 H61B 109.5 . . ?
Si3 C61 H61C 109.5 . . ?
H61A C61 H61C 109.5 . . ?
H61B C61 H61C 109.5 . . ?
Si3 C62 H62A 109.5 . . ?
Si3 C62 H62B 109.5 . . ?
H62A C62 H62B 109.5 . . ?
Si3 C62 H62C 109.5 . . ?
H62A C62 H62C 109.5 . . ?
H62B C62 H62C 109.5 . . ?
Si3 C63 H63A 109.5 . . ?
Si3 C63 H63B 109.5 . . ?
H63A C63 H63B 109.5 . . ?
Si3 C63 H63C 109.5 . . ?
H63A C63 H63C 109.5 . . ?
H63B C63 H63C 109.5 . . ?
Si4 C64 H64A 109.5 . . ?
Si4 C64 H64B 109.5 . . ?
H64A C64 H64B 109.5 . . ?
Si4 C64 H64C 109.5 . . ?
H64A C64 H64C 109.5 . . ?
H64B C64 H64C 109.5 . . ?
Si4 C65 H65A 109.5 . . ?
Si4 C65 H65B 109.5 . . ?
H65A C65 H65B 109.5 . . ?
Si4 C65 H65C 109.5 . . ?
H65A C65 H65C 109.5 . . ?
H65B C65 H65C 109.5 . . ?
Si4 C66 H66A 109.5 . . ?
Si4 C66 H66B 109.5 . . ?
H66A C66 H66B 109.5 . . ?
Si4 C66 H66C 109.5 . . ?
H66A C66 H66C 109.5 . . ?
H66B C66 H66C 109.5 . . ?
Si5 C67 H67A 109.5 . . ?
Si5 C67 H67B 109.5 . . ?
H67A C67 H67B 109.5 . . ?
Si5 C67 H67C 109.5 . . ?
H67A C67 H67C 109.5 . . ?
H67B C67 H67C 109.5 . . ?
Si5 C68 H68A 109.5 . . ?
Si5 C68 H68B 109.5 . . ?
H68A C68 H68B 109.5 . . ?
Si5 C68 H68C 109.5 . . ?
H68A C68 H68C 109.5 . . ?
H68B C68 H68C 109.5 . . ?
Si5 C69 H69A 109.5 . . ?
Si5 C69 H69B 109.5 . . ?
H69A C69 H69B 109.5 . . ?
Si5 C69 H69C 109.5 . . ?
H69A C69 H69C 109.5 . . ?
H69B C69 H69C 109.5 . . ?
Si6 C70 H70A 109.5 . . ?
Si6 C70 H70B 109.5 . . ?
H70A C70 H70B 109.5 . . ?
Si6 C70 H70C 109.5 . . ?
H70A C70 H70C 109.5 . . ?
H70B C70 H70C 109.5 . . ?
Si6 C71 H71A 109.5 . . ?
Si6 C71 H71B 109.5 . . ?
H71A C71 H71B 109.5 . . ?
Si6 C71 H71C 109.5 . . ?
H71A C71 H71C 109.5 . . ?
H71B C71 H71C 109.5 . . ?
Si6 C72 H72A 109.5 . . ?
Si6 C72 H72B 109.5 . . ?
H72A C72 H72B 109.5 . . ?
Si6 C72 H72C 109.5 . . ?
H72A C72 H72C 109.5 . . ?
H72B C72 H72C 109.5 . . ?
C74 C73 H73A 109.5 . . ?
C74 C73 H73B 109.5 . . ?
H73A C73 H73B 109.5 . . ?
C74 C73 H73C 109.5 . . ?
H73A C73 H73C 109.5 . . ?
H73B C73 H73C 109.5 . . ?
C73 C74 C75 112.3(9) . . ?
C73 C74 C79 127.7(9) . . ?
C75 C74 C79 120.0 . . ?
C74 C75 C76 120.0 . . ?
C74 C75 H75 120.0 . . ?
C76 C75 H75 120.0 . . ?
C75 C76 C77 120.0 . . ?
C75 C76 H76 120.0 . . ?
C77 C76 H76 120.0 . . ?
C78 C77 C76 120.0 . . ?
C78 C77 H77 120.0 . . ?
C76 C77 H77 120.0 . . ?
C77 C78 C79 120.0 . . ?
C77 C78 H78 120.0 . . ?
C79 C78 H78 120.0 . . ?
C78 C79 C74 120.0 . . ?
C78 C79 H79 120.0 . . ?
C74 C79 H79 120.0 . . ?
 
_diffrn_measured_fraction_theta_max    0.992
_diffrn_reflns_theta_full              27.38
_diffrn_measured_fraction_theta_full   0.992
_refine_diff_density_max    0.503
_refine_diff_density_min   -0.457
_refine_diff_density_rms    0.051

#=====>END

#======================================================
 
data_compound9
 
_audit_creation_method            SHELXL-97
_chemical_name_systematic
;
 ?
;
_chemical_name_common             ?
_chemical_melting_point           ?
_chemical_formula_moiety          
'C54 H72 K N4, C18 H54 Ba N3 Si6, C7 H8 '
_chemical_formula_sum
 'C79 H134 Ba K N7 Si6'
_chemical_formula_weight          1526.91
 
loop_
 _atom_type_symbol
 _atom_type_description
 _atom_type_scat_dispersion_real
 _atom_type_scat_dispersion_imag
 _atom_type_scat_source
 'C'  'C'   0.0033   0.0016
 'International Tables Vol C Tables 4.2.6.8 and 6.1.1.4'
 'H'  'H'   0.0000   0.0000
 'International Tables Vol C Tables 4.2.6.8 and 6.1.1.4'
 'N'  'N'   0.0061   0.0033
 'International Tables Vol C Tables 4.2.6.8 and 6.1.1.4'
 'Si'  'Si'   0.0817   0.0704
 'International Tables Vol C Tables 4.2.6.8 and 6.1.1.4'
 'Ba'  'Ba'  -0.3244   2.2819
 'International Tables Vol C Tables 4.2.6.8 and 6.1.1.4'
 'K'  'K'   0.2009   0.2494
 'International Tables Vol C Tables 4.2.6.8 and 6.1.1.4'
 
_symmetry_cell_setting            monoclinic
_symmetry_space_group_name_H-M    'P 1 21/n 1'
 
loop_
 _symmetry_equiv_pos_as_xyz
 'x, y, z'
 '-x+1/2, y+1/2, -z+1/2'
 '-x, -y, -z'
 'x-1/2, -y-1/2, z-1/2'
 
_cell_length_a                    16.90150(10)
_cell_length_b                    19.0122(2)
_cell_length_c                    29.1601(3)
_cell_angle_alpha                 90.00
_cell_angle_beta                  97.5770(10)
_cell_angle_gamma                 90.00
_cell_volume                      9288.34(15)
_cell_formula_units_Z             4
_cell_measurement_temperature     150(2)
_cell_measurement_reflns_used     170602
_cell_measurement_theta_min       2.91
_cell_measurement_theta_max       30.03
 
_exptl_crystal_description        ?
_exptl_crystal_colour             ?
_exptl_crystal_size_max           0.50
_exptl_crystal_size_mid           0.40
_exptl_crystal_size_min           0.30
_exptl_crystal_density_meas       ?
_exptl_crystal_density_diffrn     1.092
_exptl_crystal_density_method     'not measured'
_exptl_crystal_F_000              3264
_exptl_absorpt_coefficient_mu     0.590
_exptl_absorpt_correction_type    multi-scan
_exptl_absorpt_correction_T_min   0.7570
_exptl_absorpt_correction_T_max   0.8430
_exptl_absorpt_process_details    
;
 multi-scan from symmetry-related measurements 
 Sortav (Blessing 1995)
;

 
_exptl_special_details
;
 ?
;
 
_diffrn_ambient_temperature       150(2)
_diffrn_radiation_wavelength      0.71073
_diffrn_radiation_type            MoK\a
_diffrn_radiation_source          'fine-focus sealed tube'
_diffrn_radiation_monochromator   graphite
_diffrn_measurement_device_type   'Nonius Kappa CCD'
_diffrn_measurement_method        '778 1.0 degree images with \f and \v scans'
_diffrn_standards_number          0
_diffrn_standards_decay_%         0
_diffrn_reflns_number             141691
_diffrn_reflns_av_R_equivalents   0.1013
_diffrn_reflns_av_sigmaI/netI     0.0849
_diffrn_reflns_limit_h_min        -23
_diffrn_reflns_limit_h_max        23
_diffrn_reflns_limit_k_min        -26
_diffrn_reflns_limit_k_max        26
_diffrn_reflns_limit_l_min        -40
_diffrn_reflns_limit_l_max        41
_diffrn_reflns_theta_min          2.92
_diffrn_reflns_theta_max          30.10
_reflns_number_total              26996
_reflns_number_gt                 15663
_reflns_threshold_expression      >2sigma(I)
 
_computing_data_collection        'Collect (Nonius BV, 1997-2000)'
_computing_cell_refinement         'HKL Scalepack (Otwinski & Minor, 1997)'
_computing_data_reduction         
;
 DENZO-SCALEPACK Z. Otwinowski and W. Minor, " 
 Processing of X-ray Diffraction Data Collected in Oscillation Mode ", 
 Methods in Enzymology, Volume 276: Macromolecular Crystallography, 
 part A, p.307-326, 1997,C.W. Carter, Jr. & R. M. Sweet, Eds., Academic Press.
;
_computing_structure_solution     
; 
 SIR97- Altomare A., Burla M.C., Camalli M., Cascarano G.L., Giacovazzo C. , 
 Guagliardi A., Moliterni A.G.G., Polidori G.,Spagna R. 
 (1999) J. Appl. Cryst. 32, 115-119
;
_computing_structure_refinement   
;
 SHELXL97 -Program for Crystal Structure Analysis (Release 97-2). 
 Sheldrick, G.M., Institut f\"ur Anorganische Chemie der Universit\"at, 
 Tammanstrasse 4, D-3400 G\"ottingen, Germany, 1998 
;
_computing_molecular_graphics  

'ORTEP3 for Windows - Farrugia, L. J. J. Appl. Crystallogr. 1997, 30, 565'

_computing_publication_material    
;
 'WinGX publication routines, Farrugia, 
 L. J., J. Appl. Crystallogr., 1999, 32, 837-838
;  
 
_refine_special_details
;
 Refinement of F^2^ against ALL reflections.  The weighted R-factor wR and
 goodness of fit S are based on F^2^, conventional R-factors R are based
 on F, with F set to zero for negative F^2^. The threshold expression of
 F^2^ > 2sigma(F^2^) is used only for calculating R-factors(gt) etc. and is
 not relevant to the choice of reflections for refinement.  R-factors based
 on F^2^ are statistically about twice as large as those based on F, and R-
 factors based on ALL data will be even larger.
;
 
_refine_ls_structure_factor_coef  Fsqd
_refine_ls_matrix_type            full
_refine_ls_weighting_scheme       calc
_refine_ls_weighting_details
 'calc w=1/[\s^2^(Fo^2^)+(0.0542P)^2^+2.1038P] where P=(Fo^2^+2Fc^2^)/3'
_atom_sites_solution_primary      direct
_atom_sites_solution_secondary    difmap
_atom_sites_solution_hydrogens    geom
_refine_ls_hydrogen_treatment     constr
_refine_ls_extinction_method      none
_refine_ls_extinction_coef        ?
_refine_ls_number_reflns          26996
_refine_ls_number_parameters      885
_refine_ls_number_restraints      0
_refine_ls_R_factor_all           0.1178
_refine_ls_R_factor_gt            0.0499
_refine_ls_wR_factor_ref          0.1258
_refine_ls_wR_factor_gt           0.1035
_refine_ls_goodness_of_fit_ref    1.016
_refine_ls_restrained_S_all       1.016
_refine_ls_shift/su_max           0.001
_refine_ls_shift/su_mean          0.000
 
loop_
 _atom_site_label
 _atom_site_type_symbol
 _atom_site_fract_x
 _atom_site_fract_y
 _atom_site_fract_z
 _atom_site_U_iso_or_equiv
 _atom_site_adp_type
 _atom_site_occupancy
 _atom_site_symmetry_multiplicity
 _atom_site_calc_flag
 _atom_site_refinement_flags
 _atom_site_disorder_assembly
 _atom_site_disorder_group
Ba1 Ba 0.494034(10) 0.019285(8) 0.231740(5) 0.03254(5) Uani 1 1 d . . .
K1 K 0.5000 0.5000 0.0000 0.0597(3) Uani 1 2 d S . .
K1A K 0.0000 0.0000 0.0000 0.0568(3) Uani 1 2 d S . .
Si1 Si 0.50459(5) -0.01120(4) 0.11017(3) 0.03781(18) Uani 1 1 d . . .
Si2 Si 0.60532(6) -0.11254(4) 0.17531(3) 0.0461(2) Uani 1 1 d . . .
Si3 Si 0.47092(6) -0.01889(4) 0.34999(3) 0.0474(2) Uani 1 1 d . . .
Si4 Si 0.34219(6) -0.08553(5) 0.27927(4) 0.0623(3) Uani 1 1 d . . .
Si5 Si 0.43865(5) 0.20298(4) 0.24323(3) 0.03689(18) Uani 1 1 d . . .
Si6 Si 0.61400(5) 0.17730(4) 0.23253(3) 0.0436(2) Uani 1 1 d . . .
N1 N 0.61894(12) 0.57496(10) 0.09231(7) 0.0278(4) Uani 1 1 d . . .
N2 N 0.68620(12) 0.62923(10) 0.04682(7) 0.0274(4) Uani 1 1 d . . .
N1A N 0.05511(11) 0.17190(10) 0.01406(7) 0.0274(4) Uani 1 1 d . . .
N2A N -0.06428(12) 0.20426(10) 0.01695(7) 0.0323(5) Uani 1 1 d . . .
N3 N 0.54095(13) -0.04701(11) 0.16092(7) 0.0336(5) Uani 1 1 d . . .
N4 N 0.42511(15) -0.04051(12) 0.29746(8) 0.0448(6) Uani 1 1 d . . .
N5 N 0.52032(13) 0.15508(11) 0.23844(7) 0.0333(5) Uani 1 1 d . . .
C1 C 0.62469(14) 0.58272(12) 0.04619(8) 0.0282(5) Uani 1 1 d . . .
C2 C 0.67457(15) 0.61464(13) 0.12014(9) 0.0333(6) Uani 1 1 d . . .
H2 H 0.6814 0.6171 0.1530 0.040 Uiso 1 1 calc R . .
C3 C 0.71705(16) 0.64899(13) 0.09140(9) 0.0337(6) Uani 1 1 d . . .
H3 H 0.7599 0.6807 0.0999 0.040 Uiso 1 1 calc R . .
C4 C 0.56171(15) 0.52519(13) 0.10609(8) 0.0314(6) Uani 1 1 d . . .
C5 C 0.48543(16) 0.54825(15) 0.11155(9) 0.0374(6) Uani 1 1 d . . .
C6 C 0.42867(18) 0.49757(17) 0.11866(11) 0.0503(8) Uani 1 1 d . . .
H6 H 0.3761 0.5117 0.1227 0.060 Uiso 1 1 calc R . .
C7 C 0.4481(2) 0.42714(18) 0.11993(12) 0.0591(9) Uani 1 1 d . . .
H7 H 0.4083 0.3932 0.1239 0.071 Uiso 1 1 calc R . .
C8 C 0.52452(19) 0.40546(16) 0.11547(11) 0.0540(9) Uani 1 1 d . . .
H8 H 0.5370 0.3567 0.1172 0.065 Uiso 1 1 calc R . .
C9 C 0.58384(16) 0.45391(14) 0.10846(9) 0.0373(6) Uani 1 1 d . . .
C10 C 0.46391(17) 0.62652(16) 0.10870(10) 0.0448(7) Uani 1 1 d . . .
H10 H 0.5134 0.6537 0.1197 0.054 Uiso 1 1 calc R . .
C11 C 0.4011(2) 0.6464(2) 0.13934(12) 0.0697(10) Uani 1 1 d . . .
H11A H 0.3948 0.6977 0.1394 0.105 Uiso 1 1 calc R . .
H11B H 0.4180 0.6299 0.1710 0.105 Uiso 1 1 calc R . .
H11C H 0.3501 0.6245 0.1273 0.105 Uiso 1 1 calc R . .
C12 C 0.4360(2) 0.64868(17) 0.05886(11) 0.0578(9) Uani 1 1 d . . .
H12A H 0.4778 0.6383 0.0396 0.087 Uiso 1 1 calc R . .
H12B H 0.4247 0.6993 0.0579 0.087 Uiso 1 1 calc R . .
H12C H 0.3874 0.6227 0.0471 0.087 Uiso 1 1 calc R . .
C13 C 0.66845(17) 0.43028(14) 0.10466(11) 0.0452(7) Uani 1 1 d . . .
H13 H 0.6949 0.4684 0.0886 0.054 Uiso 1 1 calc R . .
C14 C 0.7157(2) 0.42075(18) 0.15267(12) 0.0614(9) Uani 1 1 d . . .
H14A H 0.7181 0.4656 0.1693 0.092 Uiso 1 1 calc R . .
H14B H 0.7700 0.4051 0.1495 0.092 Uiso 1 1 calc R . .
H14C H 0.6894 0.3854 0.1699 0.092 Uiso 1 1 calc R . .
C15 C 0.6712(2) 0.36291(16) 0.07607(11) 0.0570(9) Uani 1 1 d . . .
H15A H 0.6522 0.3232 0.0931 0.086 Uiso 1 1 calc R . .
H15B H 0.7262 0.3540 0.0704 0.086 Uiso 1 1 calc R . .
H15C H 0.6369 0.3684 0.0465 0.086 Uiso 1 1 calc R . .
C16 C 0.71240(14) 0.65261(13) 0.00403(8) 0.0299(5) Uani 1 1 d . . .
C17 C 0.76837(15) 0.61179(13) -0.01496(9) 0.0334(6) Uani 1 1 d . . .
C18 C 0.78669(16) 0.63118(15) -0.05865(9) 0.0407(7) Uani 1 1 d . . .
H18 H 0.8237 0.6039 -0.0730 0.049 Uiso 1 1 calc R . .
C19 C 0.75166(17) 0.68943(16) -0.08113(10) 0.0434(7) Uani 1 1 d . . .
H19 H 0.7646 0.7017 -0.1108 0.052 Uiso 1 1 calc R . .
C20 C 0.69841(17) 0.72979(16) -0.06101(9) 0.0418(7) Uani 1 1 d . . .
H20 H 0.6762 0.7705 -0.0766 0.050 Uiso 1 1 calc R . .
C21 C 0.67632(15) 0.71194(13) -0.01784(9) 0.0331(6) Uani 1 1 d . . .
C22 C 0.80699(17) 0.54763(15) 0.00939(10) 0.0438(7) Uani 1 1 d . . .
H22 H 0.7952 0.5487 0.0421 0.053 Uiso 1 1 calc R . .
C23 C 0.7707(2) 0.47997(16) -0.01298(14) 0.0639(10) Uani 1 1 d . . .
H23A H 0.7128 0.4805 -0.0128 0.096 Uiso 1 1 calc R . .
H23B H 0.7937 0.4392 0.0045 0.096 Uiso 1 1 calc R . .
H23C H 0.7824 0.4770 -0.0450 0.096 Uiso 1 1 calc R . .
C24 C 0.89759(19) 0.54810(19) 0.01060(13) 0.0628(9) Uani 1 1 d . . .
H24A H 0.9110 0.5459 -0.0211 0.094 Uiso 1 1 calc R . .
H24B H 0.9205 0.5073 0.0281 0.094 Uiso 1 1 calc R . .
H24C H 0.9194 0.5914 0.0255 0.094 Uiso 1 1 calc R . .
C25 C 0.61483(16) 0.75545(14) 0.00251(10) 0.0388(6) Uani 1 1 d . . .
H25 H 0.6054 0.7331 0.0324 0.047 Uiso 1 1 calc R . .
C26 C 0.6444(2) 0.83052(16) 0.01303(12) 0.0569(9) Uani 1 1 d . . .
H26A H 0.6943 0.8291 0.0343 0.085 Uiso 1 1 calc R . .
H26B H 0.6041 0.8568 0.0273 0.085 Uiso 1 1 calc R . .
H26C H 0.6537 0.8537 -0.0158 0.085 Uiso 1 1 calc R . .
C27 C 0.53532(18) 0.7563(2) -0.02940(13) 0.0643(10) Uani 1 1 d . . .
H27A H 0.5425 0.7796 -0.0585 0.096 Uiso 1 1 calc R . .
H27B H 0.4955 0.7819 -0.0144 0.096 Uiso 1 1 calc R . .
H27C H 0.5171 0.7079 -0.0357 0.096 Uiso 1 1 calc R . .
C1A C -0.02032(14) 0.14520(13) 0.01233(9) 0.0311(5) Uani 1 1 d . . .
C2A C 0.05744(16) 0.24406(13) 0.01942(10) 0.0366(6) Uani 1 1 d . . .
H2A H 0.1032 0.2734 0.0211 0.044 Uiso 1 1 calc R . .
C3A C -0.01767(16) 0.26436(13) 0.02170(10) 0.0407(7) Uani 1 1 d . . .
H3A H -0.0356 0.3110 0.0258 0.049 Uiso 1 1 calc R . .
C4A C 0.11964(14) 0.12420(12) 0.00929(9) 0.0283(5) Uani 1 1 d . . .
C5A C 0.16134(14) 0.09451(13) 0.04902(9) 0.0314(6) Uani 1 1 d . . .
C6A C 0.21566(16) 0.04111(14) 0.04307(10) 0.0385(6) Uani 1 1 d . . .
H6A H 0.2442 0.0191 0.0695 0.046 Uiso 1 1 calc R . .
C7A C 0.22858(16) 0.01979(14) -0.00058(10) 0.0403(6) Uani 1 1 d . . .
H7A H 0.2655 -0.0169 -0.0038 0.048 Uiso 1 1 calc R . .
C8A C 0.18827(15) 0.05135(14) -0.03968(9) 0.0359(6) Uani 1 1 d . . .
H8A H 0.1984 0.0366 -0.0695 0.043 Uiso 1 1 calc R . .
C9A C 0.13299(14) 0.10453(13) -0.03566(9) 0.0302(5) Uani 1 1 d . . .
C10A C 0.14281(16) 0.11519(16) 0.09703(9) 0.0405(7) Uani 1 1 d . . .
H10A H 0.1200 0.1638 0.0945 0.049 Uiso 1 1 calc R . .
C11A C 0.21551(18) 0.11744(18) 0.13337(10) 0.0546(8) Uani 1 1 d . . .
H11D H 0.2332 0.0694 0.1413 0.082 Uiso 1 1 calc R . .
H11E H 0.2019 0.1412 0.1611 0.082 Uiso 1 1 calc R . .
H11F H 0.2585 0.1432 0.1212 0.082 Uiso 1 1 calc R . .
C12A C 0.0787(2) 0.0671(2) 0.11182(11) 0.0628(9) Uani 1 1 d . . .
H12D H 0.0309 0.0694 0.0889 0.094 Uiso 1 1 calc R . .
H12E H 0.0654 0.0824 0.1420 0.094 Uiso 1 1 calc R . .
H12F H 0.0986 0.0187 0.1141 0.094 Uiso 1 1 calc R . .
C13A C 0.08804(16) 0.14029(14) -0.07801(9) 0.0349(6) Uani 1 1 d . . .
H13A H 0.0349 0.1553 -0.0698 0.042 Uiso 1 1 calc R . .
C14A C 0.13274(19) 0.20695(15) -0.08975(10) 0.0472(7) Uani 1 1 d . . .
H14D H 0.1420 0.2372 -0.0624 0.071 Uiso 1 1 calc R . .
H14E H 0.1007 0.2324 -0.1149 0.071 Uiso 1 1 calc R . .
H14F H 0.1841 0.1938 -0.0995 0.071 Uiso 1 1 calc R . .
C15A C 0.07273(19) 0.09217(16) -0.12024(10) 0.0472(7) Uani 1 1 d . . .
H15D H 0.1232 0.0826 -0.1321 0.071 Uiso 1 1 calc R . .
H15E H 0.0357 0.1152 -0.1443 0.071 Uiso 1 1 calc R . .
H15F H 0.0495 0.0478 -0.1114 0.071 Uiso 1 1 calc R . .
C16A C -0.14977(15) 0.20125(13) 0.01593(11) 0.0375(6) Uani 1 1 d . . .
C17A C -0.18078(17) 0.19065(15) 0.05740(11) 0.0452(7) Uani 1 1 d . . .
C18A C -0.26348(18) 0.18317(16) 0.05462(13) 0.0555(9) Uani 1 1 d . . .
H18A H -0.2871 0.1751 0.0820 0.067 Uiso 1 1 calc R . .
C19A C -0.31128(19) 0.18736(18) 0.01234(14) 0.0630(10) Uani 1 1 d . . .
H19A H -0.3675 0.1827 0.0111 0.076 Uiso 1 1 calc R . .
C20A C -0.27915(18) 0.19806(17) -0.02733(14) 0.0569(9) Uani 1 1 d . . .
H20A H -0.3132 0.2004 -0.0559 0.068 Uiso 1 1 calc R . .
C21A C -0.19663(16) 0.20574(14) -0.02684(11) 0.0429(7) Uani 1 1 d . . .
C22A C -0.12850(18) 0.18421(16) 0.10388(10) 0.0470(7) Uani 1 1 d . . .
H22A H -0.0718 0.1899 0.0982 0.056 Uiso 1 1 calc R . .
C23A C -0.1363(2) 0.11231(18) 0.12498(13) 0.0723(11) Uani 1 1 d . . .
H23D H -0.1912 0.1056 0.1316 0.108 Uiso 1 1 calc R . .
H23E H -0.0994 0.1086 0.1538 0.108 Uiso 1 1 calc R . .
H23F H -0.1234 0.0761 0.1032 0.108 Uiso 1 1 calc R . .
C24A C -0.1465(2) 0.24251(19) 0.13671(13) 0.0708(11) Uani 1 1 d . . .
H24D H -0.2012 0.2372 0.1440 0.106 Uiso 1 1 calc R . .
H24E H -0.1410 0.2883 0.1220 0.106 Uiso 1 1 calc R . .
H24F H -0.1090 0.2396 0.1653 0.106 Uiso 1 1 calc R . .
C25A C -0.16120(18) 0.21416(15) -0.07181(11) 0.0488(8) Uani 1 1 d . . .
H25A H -0.1042 0.2283 -0.0633 0.059 Uiso 1 1 calc R . .
C26A C -0.1611(3) 0.1443(2) -0.09751(13) 0.0785(11) Uani 1 1 d . . .
H26D H -0.1330 0.1088 -0.0771 0.118 Uiso 1 1 calc R . .
H26E H -0.1340 0.1502 -0.1250 0.118 Uiso 1 1 calc R . .
H26F H -0.2162 0.1290 -0.1070 0.118 Uiso 1 1 calc R . .
C27A C -0.2012(3) 0.2716(2) -0.10339(18) 0.1047(17) Uani 1 1 d . . .
H27D H -0.2562 0.2577 -0.1146 0.157 Uiso 1 1 calc R . .
H27E H -0.1715 0.2782 -0.1298 0.157 Uiso 1 1 calc R . .
H27F H -0.2015 0.3157 -0.0861 0.157 Uiso 1 1 calc R . .
C28 C 0.4348(2) 0.06343(18) 0.12075(10) 0.0555(8) Uani 1 1 d . . .
H28A H 0.3926 0.0456 0.1376 0.083 Uiso 1 1 calc R . .
H28B H 0.4110 0.0830 0.0910 0.083 Uiso 1 1 calc R . .
H28C H 0.4649 0.1002 0.1390 0.083 Uiso 1 1 calc R . .
C29 C 0.5812(2) 0.0274(2) 0.07661(12) 0.0683(10) Uani 1 1 d . . .
H29A H 0.6143 0.0610 0.0961 0.102 Uiso 1 1 calc R . .
H29B H 0.5544 0.0517 0.0492 0.102 Uiso 1 1 calc R . .
H29C H 0.6150 -0.0102 0.0669 0.102 Uiso 1 1 calc R . .
C30 C 0.4419(2) -0.0721(2) 0.06997(12) 0.0767(12) Uani 1 1 d . . .
H30A H 0.4743 -0.1123 0.0625 0.115 Uiso 1 1 calc R . .
H30B H 0.4217 -0.0470 0.0415 0.115 Uiso 1 1 calc R . .
H30C H 0.3968 -0.0890 0.0849 0.115 Uiso 1 1 calc R . .
C31 C 0.5726(3) -0.20003(18) 0.15046(15) 0.0910(14) Uani 1 1 d . . .
H31A H 0.5197 -0.2114 0.1587 0.137 Uiso 1 1 calc R . .
H31B H 0.6109 -0.2362 0.1629 0.137 Uiso 1 1 calc R . .
H31C H 0.5702 -0.1984 0.1167 0.137 Uiso 1 1 calc R . .
C32 C 0.7070(2) -0.0975(2) 0.15813(14) 0.0771(12) Uani 1 1 d . . .
H32A H 0.7032 -0.0960 0.1243 0.116 Uiso 1 1 calc R . .
H32B H 0.7426 -0.1360 0.1700 0.116 Uiso 1 1 calc R . .
H32C H 0.7284 -0.0528 0.1711 0.116 Uiso 1 1 calc R . .
C33 C 0.6203(2) -0.12409(18) 0.23995(11) 0.0613(9) Uani 1 1 d . . .
H33A H 0.6484 -0.0831 0.2545 0.092 Uiso 1 1 calc R . .
H33B H 0.6520 -0.1665 0.2480 0.092 Uiso 1 1 calc R . .
H33C H 0.5682 -0.1287 0.2510 0.092 Uiso 1 1 calc R . .
C34 C 0.5673(2) 0.0287(2) 0.34488(11) 0.0647(10) Uani 1 1 d . . .
H34A H 0.6010 -0.0006 0.3276 0.097 Uiso 1 1 calc R . .
H34B H 0.5954 0.0381 0.3759 0.097 Uiso 1 1 calc R . .
H34C H 0.5557 0.0732 0.3285 0.097 Uiso 1 1 calc R . .
C35 C 0.4125(2) 0.04355(19) 0.38281(12) 0.0690(10) Uani 1 1 d . . .
H35A H 0.4041 0.0879 0.3657 0.103 Uiso 1 1 calc R . .
H35B H 0.4422 0.0527 0.4134 0.103 Uiso 1 1 calc R . .
H35C H 0.3607 0.0226 0.3864 0.103 Uiso 1 1 calc R . .
C36 C 0.4995(2) -0.09635(19) 0.38840(12) 0.0739(11) Uani 1 1 d . . .
H36A H 0.4512 -0.1203 0.3954 0.111 Uiso 1 1 calc R . .
H36B H 0.5306 -0.0802 0.4172 0.111 Uiso 1 1 calc R . .
H36C H 0.5317 -0.1291 0.3726 0.111 Uiso 1 1 calc R . .
C37 C 0.2506(2) -0.0559(2) 0.30449(16) 0.0851(13) Uani 1 1 d . . .
H37A H 0.2566 -0.0675 0.3375 0.128 Uiso 1 1 calc R . .
H37B H 0.2035 -0.0798 0.2885 0.128 Uiso 1 1 calc R . .
H37C H 0.2443 -0.0049 0.3005 0.128 Uiso 1 1 calc R . .
C38 C 0.3512(3) -0.1831(2) 0.2904(2) 0.1111(18) Uani 1 1 d . . .
H38A H 0.3916 -0.2028 0.2729 0.167 Uiso 1 1 calc R . .
H38B H 0.2997 -0.2057 0.2806 0.167 Uiso 1 1 calc R . .
H38C H 0.3669 -0.1914 0.3235 0.167 Uiso 1 1 calc R . .
C39 C 0.3182(3) -0.0750(3) 0.21450(14) 0.1001(16) Uani 1 1 d . . .
H39A H 0.3167 -0.0249 0.2066 0.150 Uiso 1 1 calc R . .
H39B H 0.2661 -0.0962 0.2040 0.150 Uiso 1 1 calc R . .
H39C H 0.3593 -0.0984 0.1993 0.150 Uiso 1 1 calc R . .
C40 C 0.35128(17) 0.14230(16) 0.24661(11) 0.0500(8) Uani 1 1 d . . .
H40A H 0.3399 0.1159 0.2176 0.075 Uiso 1 1 calc R . .
H40B H 0.3043 0.1701 0.2516 0.075 Uiso 1 1 calc R . .
H40C H 0.3642 0.1094 0.2724 0.075 Uiso 1 1 calc R . .
C41 C 0.4468(2) 0.25995(19) 0.29606(12) 0.0675(10) Uani 1 1 d . . .
H41A H 0.4591 0.2307 0.3237 0.101 Uiso 1 1 calc R . .
H41B H 0.3960 0.2844 0.2972 0.101 Uiso 1 1 calc R . .
H41C H 0.4894 0.2946 0.2949 0.101 Uiso 1 1 calc R . .
C42 C 0.4077(2) 0.26254(17) 0.19269(12) 0.0632(10) Uani 1 1 d . . .
H42A H 0.4468 0.3006 0.1924 0.095 Uiso 1 1 calc R . .
H42B H 0.3551 0.2826 0.1954 0.095 Uiso 1 1 calc R . .
H42C H 0.4050 0.2356 0.1639 0.095 Uiso 1 1 calc R . .
C43 C 0.67683(19) 0.09611(17) 0.22918(13) 0.0605(9) Uani 1 1 d . . .
H43A H 0.6795 0.0699 0.2583 0.091 Uiso 1 1 calc R . .
H43B H 0.7308 0.1098 0.2239 0.091 Uiso 1 1 calc R . .
H43C H 0.6529 0.0664 0.2036 0.091 Uiso 1 1 calc R . .
C44 C 0.6236(3) 0.2279(2) 0.17863(17) 0.1026(17) Uani 1 1 d . . .
H44A H 0.5986 0.2015 0.1517 0.154 Uiso 1 1 calc R . .
H44B H 0.6803 0.2352 0.1760 0.154 Uiso 1 1 calc R . .
H44C H 0.5971 0.2736 0.1799 0.154 Uiso 1 1 calc R . .
C45 C 0.6673(2) 0.2290(2) 0.28195(17) 0.0996(16) Uani 1 1 d . . .
H45A H 0.6440 0.2762 0.2822 0.149 Uiso 1 1 calc R . .
H45B H 0.7240 0.2326 0.2784 0.149 Uiso 1 1 calc R . .
H45C H 0.6616 0.2051 0.3111 0.149 Uiso 1 1 calc R . .
C46 C 0.5354(5) 0.4501(3) 0.24686(17) 0.180(4) Uani 1 1 d . . .
H46A H 0.5380 0.4359 0.2148 0.270 Uiso 1 1 calc R . .
H46B H 0.4890 0.4280 0.2579 0.270 Uiso 1 1 calc R . .
H46C H 0.5842 0.4351 0.2664 0.270 Uiso 1 1 calc R . .
C47 C 0.5280(5) 0.5260(3) 0.24911(15) 0.121(2) Uani 1 1 d . . .
C48 C 0.4560(4) 0.5570(5) 0.26121(15) 0.126(2) Uani 1 1 d . . .
H48 H 0.4123 0.5285 0.2672 0.151 Uiso 1 1 calc R . .
C49 C 0.4521(4) 0.6326(4) 0.26396(17) 0.122(2) Uani 1 1 d . . .
H49 H 0.4061 0.6549 0.2728 0.147 Uiso 1 1 calc R . .
C50 C 0.5133(4) 0.6707(4) 0.25409(17) 0.1118(17) Uani 1 1 d . . .
H50 H 0.5102 0.7205 0.2557 0.134 Uiso 1 1 calc R . .
C51 C 0.5827(4) 0.6395(4) 0.24135(17) 0.1073(16) Uani 1 1 d . . .
H51 H 0.6256 0.6675 0.2337 0.129 Uiso 1 1 calc R . .
C52 C 0.5865(4) 0.5679(3) 0.24035(15) 0.1101(18) Uani 1 1 d . . .
H52 H 0.6341 0.5469 0.2329 0.132 Uiso 1 1 calc R . .
 
loop_
 _atom_site_aniso_label
 _atom_site_aniso_U_11
 _atom_site_aniso_U_22
 _atom_site_aniso_U_33
 _atom_site_aniso_U_23
 _atom_site_aniso_U_13
 _atom_site_aniso_U_12
Ba1 0.04190(10) 0.02924(8) 0.02876(8) 0.00049(7) 0.01314(6) -0.00253(7)
K1 0.0559(6) 0.0652(6) 0.0534(6) -0.0129(5) -0.0097(5) -0.0248(5)
K1A 0.0548(6) 0.0232(4) 0.0970(9) -0.0043(5) 0.0267(6) -0.0036(4)
Si1 0.0381(4) 0.0496(5) 0.0263(4) -0.0027(3) 0.0060(3) -0.0032(4)
Si2 0.0645(6) 0.0338(4) 0.0432(5) -0.0003(3) 0.0183(4) 0.0120(4)
Si3 0.0608(6) 0.0506(5) 0.0347(4) 0.0154(4) 0.0204(4) 0.0164(4)
Si4 0.0631(6) 0.0550(6) 0.0736(7) 0.0101(5) 0.0274(5) -0.0146(5)
Si5 0.0448(5) 0.0334(4) 0.0328(4) -0.0010(3) 0.0064(3) 0.0030(3)
Si6 0.0433(5) 0.0364(4) 0.0529(5) -0.0023(4) 0.0134(4) -0.0082(4)
N1 0.0296(11) 0.0259(10) 0.0272(10) 0.0023(8) 0.0020(9) -0.0032(9)
N2 0.0294(11) 0.0263(10) 0.0265(10) 0.0002(8) 0.0033(9) -0.0031(9)
N1A 0.0223(10) 0.0257(10) 0.0341(11) -0.0003(9) 0.0029(9) -0.0007(8)
N2A 0.0250(11) 0.0279(11) 0.0440(13) -0.0050(9) 0.0050(9) 0.0008(9)
N3 0.0376(12) 0.0334(11) 0.0310(11) -0.0019(9) 0.0088(9) -0.0003(10)
N4 0.0515(15) 0.0434(13) 0.0438(14) 0.0119(11) 0.0216(12) 0.0022(11)
N5 0.0382(12) 0.0309(11) 0.0318(11) 0.0003(9) 0.0080(10) -0.0022(9)
C1 0.0294(13) 0.0265(12) 0.0282(13) 0.0016(10) 0.0023(10) -0.0023(10)
C2 0.0365(15) 0.0341(14) 0.0280(13) -0.0034(11) -0.0008(11) -0.0045(11)
C3 0.0356(15) 0.0341(14) 0.0304(13) -0.0037(11) 0.0004(11) -0.0103(11)
C4 0.0329(14) 0.0332(13) 0.0275(12) 0.0046(11) 0.0020(10) -0.0075(11)
C5 0.0340(15) 0.0509(16) 0.0266(13) 0.0071(12) 0.0021(11) -0.0030(13)
C6 0.0344(16) 0.066(2) 0.0501(18) 0.0137(15) 0.0057(14) -0.0088(14)
C7 0.045(2) 0.063(2) 0.068(2) 0.0240(18) -0.0001(16) -0.0243(16)
C8 0.055(2) 0.0397(16) 0.064(2) 0.0202(15) -0.0044(17) -0.0128(15)
C9 0.0390(16) 0.0335(14) 0.0376(15) 0.0085(12) -0.0015(12) -0.0064(12)
C10 0.0360(16) 0.0517(18) 0.0468(17) -0.0013(14) 0.0052(13) 0.0038(13)
C11 0.056(2) 0.093(3) 0.061(2) -0.004(2) 0.0130(18) 0.023(2)
C12 0.067(2) 0.0486(18) 0.059(2) 0.0156(16) 0.0125(17) 0.0136(16)
C13 0.0439(17) 0.0321(14) 0.0592(19) 0.0093(13) 0.0057(15) -0.0010(13)
C14 0.051(2) 0.059(2) 0.070(2) -0.0136(18) -0.0117(17) 0.0069(16)
C15 0.074(2) 0.0474(18) 0.0487(19) 0.0034(15) 0.0053(17) 0.0090(17)
C16 0.0281(13) 0.0330(13) 0.0294(13) 0.0008(10) 0.0065(10) -0.0091(11)
C17 0.0319(14) 0.0358(14) 0.0325(14) -0.0030(11) 0.0049(11) -0.0074(11)
C18 0.0329(15) 0.0529(17) 0.0383(15) -0.0069(13) 0.0118(12) -0.0095(13)
C19 0.0393(17) 0.0595(19) 0.0318(15) 0.0043(14) 0.0068(12) -0.0144(14)
C20 0.0389(16) 0.0512(17) 0.0350(15) 0.0127(13) 0.0030(13) -0.0073(13)
C21 0.0269(14) 0.0356(14) 0.0359(14) 0.0018(11) 0.0008(11) -0.0075(11)
C22 0.0457(17) 0.0419(16) 0.0467(17) 0.0003(13) 0.0166(14) 0.0071(13)
C23 0.074(2) 0.0407(18) 0.082(3) -0.0045(17) 0.027(2) 0.0003(17)
C24 0.049(2) 0.071(2) 0.070(2) 0.0133(19) 0.0120(17) 0.0181(17)
C25 0.0348(15) 0.0369(14) 0.0456(16) 0.0067(12) 0.0087(12) 0.0002(12)
C26 0.061(2) 0.0432(17) 0.068(2) -0.0029(16) 0.0119(17) -0.0021(15)
C27 0.0353(18) 0.076(2) 0.080(3) 0.001(2) 0.0027(17) 0.0058(16)
C1A 0.0254(13) 0.0312(13) 0.0371(14) -0.0020(11) 0.0053(11) 0.0015(11)
C2A 0.0325(15) 0.0265(13) 0.0495(17) -0.0065(12) 0.0008(12) -0.0070(11)
C3A 0.0361(16) 0.0238(13) 0.0616(19) -0.0131(12) 0.0038(14) -0.0017(11)
C4A 0.0204(12) 0.0267(12) 0.0379(14) 0.0026(11) 0.0041(10) -0.0042(10)
C5A 0.0229(13) 0.0366(14) 0.0348(14) 0.0047(11) 0.0038(11) -0.0029(11)
C6A 0.0306(15) 0.0412(15) 0.0425(16) 0.0113(12) 0.0007(12) 0.0028(12)
C7A 0.0307(14) 0.0385(15) 0.0527(17) 0.0031(14) 0.0092(12) 0.0068(12)
C8A 0.0334(15) 0.0372(14) 0.0389(15) -0.0003(12) 0.0120(12) -0.0001(12)
C9A 0.0246(13) 0.0291(13) 0.0370(14) 0.0028(11) 0.0048(11) -0.0061(10)
C10A 0.0340(15) 0.0527(17) 0.0341(15) 0.0029(13) 0.0020(12) 0.0045(13)
C11A 0.0453(18) 0.077(2) 0.0411(17) 0.0025(16) 0.0031(14) -0.0041(17)
C12A 0.055(2) 0.089(3) 0.0459(19) 0.0021(18) 0.0145(16) -0.0104(19)
C13A 0.0315(14) 0.0399(14) 0.0340(14) 0.0061(12) 0.0070(11) -0.0010(11)
C14A 0.0555(19) 0.0425(16) 0.0436(17) 0.0110(13) 0.0066(14) -0.0056(14)
C15A 0.0492(18) 0.0501(17) 0.0405(16) 0.0013(14) -0.0007(14) -0.0061(14)
C16A 0.0256(14) 0.0256(13) 0.0611(19) -0.0101(12) 0.0053(13) 0.0036(11)
C17A 0.0338(16) 0.0383(15) 0.066(2) -0.0138(14) 0.0154(14) 0.0030(12)
C18A 0.0393(18) 0.0541(19) 0.077(2) -0.0210(17) 0.0232(17) 0.0013(15)
C19A 0.0251(16) 0.063(2) 0.101(3) -0.024(2) 0.0091(18) 0.0057(15)
C20A 0.0316(17) 0.0530(19) 0.083(3) -0.0135(18) -0.0027(17) 0.0087(14)
C21A 0.0283(15) 0.0333(14) 0.066(2) -0.0071(14) 0.0000(14) 0.0040(12)
C22A 0.0416(17) 0.0507(18) 0.0521(18) -0.0082(15) 0.0190(14) 0.0019(14)
C23A 0.083(3) 0.058(2) 0.074(3) -0.0066(19) 0.004(2) -0.003(2)
C24A 0.070(3) 0.065(2) 0.079(3) -0.026(2) 0.016(2) -0.0040(19)
C25A 0.0392(17) 0.0438(17) 0.060(2) 0.0068(15) -0.0073(15) 0.0005(13)
C26A 0.104(3) 0.074(3) 0.059(2) -0.009(2) 0.018(2) -0.011(2)
C27A 0.094(3) 0.093(3) 0.130(4) 0.059(3) 0.024(3) 0.029(3)
C28 0.059(2) 0.070(2) 0.0358(16) 0.0048(15) 0.0004(15) 0.0195(17)
C29 0.073(3) 0.087(3) 0.049(2) 0.0196(18) 0.0262(18) -0.003(2)
C30 0.065(2) 0.108(3) 0.054(2) -0.030(2) -0.0016(18) -0.011(2)
C31 0.154(4) 0.041(2) 0.080(3) -0.0090(19) 0.023(3) 0.010(2)
C32 0.069(2) 0.089(3) 0.080(3) 0.018(2) 0.033(2) 0.041(2)
C33 0.076(2) 0.056(2) 0.052(2) 0.0120(16) 0.0080(17) 0.0278(18)
C34 0.065(2) 0.090(3) 0.0375(17) 0.0059(17) 0.0001(16) -0.002(2)
C35 0.093(3) 0.068(2) 0.052(2) 0.0112(18) 0.031(2) 0.027(2)
C36 0.103(3) 0.067(2) 0.056(2) 0.0259(18) 0.025(2) 0.032(2)
C37 0.057(2) 0.093(3) 0.110(3) 0.021(3) 0.027(2) -0.007(2)
C38 0.118(4) 0.053(2) 0.177(5) 0.009(3) 0.073(4) -0.016(2)
C39 0.097(3) 0.125(4) 0.076(3) -0.016(3) 0.004(2) -0.065(3)
C40 0.0383(17) 0.0568(19) 0.0556(19) 0.0028(15) 0.0091(14) 0.0051(14)
C41 0.075(3) 0.068(2) 0.062(2) -0.0259(18) 0.0188(19) 0.0052(19)
C42 0.074(2) 0.053(2) 0.064(2) 0.0206(17) 0.0125(19) 0.0209(18)
C43 0.0412(18) 0.057(2) 0.085(3) -0.0033(18) 0.0164(17) -0.0028(15)
C44 0.085(3) 0.103(3) 0.132(4) 0.064(3) 0.061(3) 0.008(3)
C45 0.055(2) 0.107(3) 0.138(4) -0.070(3) 0.014(3) -0.026(2)
C46 0.369(11) 0.109(5) 0.051(3) 0.001(3) -0.012(5) -0.058(6)
C47 0.208(7) 0.116(5) 0.033(2) 0.004(3) -0.003(3) -0.070(5)
C48 0.131(5) 0.213(8) 0.035(2) 0.015(4) 0.012(3) -0.030(5)
C49 0.144(6) 0.152(6) 0.069(3) 0.024(4) 0.011(3) -0.031(5)
C50 0.131(5) 0.131(5) 0.071(3) 0.010(3) 0.003(3) -0.005(4)
C51 0.113(4) 0.135(5) 0.075(3) 0.003(3) 0.016(3) -0.016(4)
C52 0.145(5) 0.119(4) 0.062(3) 0.008(3) -0.001(3) -0.046(4)
 
_geom_special_details
;
 All esds (except the esd in the dihedral angle between two l.s. planes)
 are estimated using the full covariance matrix.  The cell esds are taken
 into account individually in the estimation of esds in distances, angles
 and torsion angles; correlations between esds in cell parameters are only
 used when they are defined by crystal symmetry.  An approximate (isotropic)
 treatment of cell esds is used for estimating esds involving l.s. planes.
;
 
loop_
 _geom_bond_atom_site_label_1
 _geom_bond_atom_site_label_2
 _geom_bond_distance
 _geom_bond_site_symmetry_2
 _geom_bond_publ_flag
Ba1 N5 2.623(2) . ?
Ba1 N4 2.629(2) . ?
Ba1 N3 2.629(2) . ?
Ba1 Si3 3.5952(8) . ?
Ba1 Si1 3.6195(7) . ?
Ba1 Si6 3.6228(8) . ?
Ba1 Si5 3.6426(7) . ?
Ba1 Si2 3.6528(8) . ?
Ba1 Si4 3.6628(9) . ?
K1 C1 2.825(2) . ?
K1 C1 2.825(2) 3_665 ?
K1 C4 3.168(2) . ?
K1 C4 3.168(2) 3_665 ?
K1 C9 3.405(3) . ?
K1 C9 3.405(3) 3_665 ?
K1 C5 3.420(3) . ?
K1 C5 3.420(3) 3_665 ?
K1 N1 3.4483(19) . ?
K1 N1 3.4483(19) 3_665 ?
K1A C1A 2.811(2) . ?
K1A C1A 2.811(2) 3 ?
K1A C4A 3.097(2) 3 ?
K1A C4A 3.097(2) . ?
K1A C9A 3.271(2) 3 ?
K1A C9A 3.271(2) . ?
K1A N1A 3.4082(19) 3 ?
K1A N1A 3.4082(19) . ?
K1A C5A 3.418(2) . ?
K1A C5A 3.418(2) 3 ?
Si1 N3 1.671(2) . ?
Si1 C29 1.873(3) . ?
Si1 C30 1.875(3) . ?
Si1 C28 1.896(3) . ?
Si2 N3 1.671(2) . ?
Si2 C31 1.869(4) . ?
Si2 C32 1.874(4) . ?
Si2 C33 1.881(3) . ?
Si3 N4 1.674(3) . ?
Si3 C36 1.875(3) . ?
Si3 C35 1.884(3) . ?
Si3 C34 1.887(4) . ?
Si4 N4 1.668(3) . ?
Si4 C37 1.885(4) . ?
Si4 C38 1.885(4) . ?
Si4 C39 1.889(4) . ?
Si5 N5 1.675(2) . ?
Si5 C41 1.873(3) . ?
Si5 C42 1.877(3) . ?
Si5 C40 1.887(3) . ?
Si6 N5 1.669(2) . ?
Si6 C44 1.869(4) . ?
Si6 C45 1.873(4) . ?
Si6 C43 1.884(3) . ?
N1 C1 1.369(3) . ?
N1 C2 1.382(3) . ?
N1 C4 1.447(3) . ?
N2 C1 1.363(3) . ?
N2 C3 1.387(3) . ?
N2 C16 1.448(3) . ?
N1A C1A 1.367(3) . ?
N1A C2A 1.381(3) . ?
N1A C4A 1.439(3) . ?
N2A C1A 1.363(3) . ?
N2A C3A 1.384(3) . ?
N2A C16A 1.443(3) . ?
C2 C3 1.343(4) . ?
C2 H2 0.9500 . ?
C3 H3 0.9500 . ?
C4 C5 1.391(4) . ?
C4 C9 1.405(4) . ?
C5 C6 1.394(4) . ?
C5 C10 1.532(4) . ?
C6 C7 1.378(4) . ?
C6 H6 0.9500 . ?
C7 C8 1.379(5) . ?
C7 H7 0.9500 . ?
C8 C9 1.396(4) . ?
C8 H8 0.9500 . ?
C9 C13 1.517(4) . ?
C10 C11 1.523(4) . ?
C10 C12 1.527(4) . ?
C10 H10 1.0000 . ?
C11 H11A 0.9800 . ?
C11 H11B 0.9800 . ?
C11 H11C 0.9800 . ?
C12 H12A 0.9800 . ?
C12 H12B 0.9800 . ?
C12 H12C 0.9800 . ?
C13 C14 1.529(4) . ?
C13 C15 1.532(4) . ?
C13 H13 1.0000 . ?
C14 H14A 0.9800 . ?
C14 H14B 0.9800 . ?
C14 H14C 0.9800 . ?
C15 H15A 0.9800 . ?
C15 H15B 0.9800 . ?
C15 H15C 0.9800 . ?
C16 C17 1.394(4) . ?
C16 C21 1.396(3) . ?
C17 C18 1.400(4) . ?
C17 C22 1.515(4) . ?
C18 C19 1.380(4) . ?
C18 H18 0.9500 . ?
C19 C20 1.372(4) . ?
C19 H19 0.9500 . ?
C20 C21 1.401(4) . ?
C20 H20 0.9500 . ?
C21 C25 1.510(4) . ?
C22 C24 1.527(4) . ?
C22 C23 1.533(4) . ?
C22 H22 1.0000 . ?
C23 H23A 0.9800 . ?
C23 H23B 0.9800 . ?
C23 H23C 0.9800 . ?
C24 H24A 0.9800 . ?
C24 H24B 0.9800 . ?
C24 H24C 0.9800 . ?
C25 C26 1.530(4) . ?
C25 C27 1.530(4) . ?
C25 H25 1.0000 . ?
C26 H26A 0.9800 . ?
C26 H26B 0.9800 . ?
C26 H26C 0.9800 . ?
C27 H27A 0.9800 . ?
C27 H27B 0.9800 . ?
C27 H27C 0.9800 . ?
C2A C3A 1.337(4) . ?
C2A H2A 0.9500 . ?
C3A H3A 0.9500 . ?
C4A C5A 1.394(3) . ?
C4A C9A 1.409(3) . ?
C5A C6A 1.395(4) . ?
C5A C10A 1.526(4) . ?
C6A C7A 1.380(4) . ?
C6A H6A 0.9500 . ?
C7A C8A 1.385(4) . ?
C7A H7A 0.9500 . ?
C8A C9A 1.392(3) . ?
C8A H8A 0.9500 . ?
C9A C13A 1.522(3) . ?
C10A C11A 1.514(4) . ?
C10A C12A 1.522(4) . ?
C10A H10A 1.0000 . ?
C11A H11D 0.9800 . ?
C11A H11E 0.9800 . ?
C11A H11F 0.9800 . ?
C12A H12D 0.9800 . ?
C12A H12E 0.9800 . ?
C12A H12F 0.9800 . ?
C13A C15A 1.528(4) . ?
C13A C14A 1.537(4) . ?
C13A H13A 1.0000 . ?
C14A H14D 0.9800 . ?
C14A H14E 0.9800 . ?
C14A H14F 0.9800 . ?
C15A H15D 0.9800 . ?
C15A H15E 0.9800 . ?
C15A H15F 0.9800 . ?
C16A C21A 1.389(4) . ?
C16A C17A 1.394(4) . ?
C17A C18A 1.397(4) . ?
C17A C22A 1.522(4) . ?
C18A C19A 1.384(5) . ?
C18A H18A 0.9500 . ?
C19A C20A 1.357(5) . ?
C19A H19A 0.9500 . ?
C20A C21A 1.400(4) . ?
C20A H20A 0.9500 . ?
C21A C25A 1.520(4) . ?
C22A C23A 1.512(4) . ?
C22A C24A 1.521(4) . ?
C22A H22A 1.0000 . ?
C23A H23D 0.9800 . ?
C23A H23E 0.9800 . ?
C23A H23F 0.9800 . ?
C24A H24D 0.9800 . ?
C24A H24E 0.9800 . ?
C24A H24F 0.9800 . ?
C25A C26A 1.525(5) . ?
C25A C27A 1.528(5) . ?
C25A H25A 1.0000 . ?
C26A H26D 0.9800 . ?
C26A H26E 0.9800 . ?
C26A H26F 0.9800 . ?
C27A H27D 0.9800 . ?
C27A H27E 0.9800 . ?
C27A H27F 0.9800 . ?
C28 H28A 0.9800 . ?
C28 H28B 0.9800 . ?
C28 H28C 0.9800 . ?
C29 H29A 0.9800 . ?
C29 H29B 0.9800 . ?
C29 H29C 0.9800 . ?
C30 H30A 0.9800 . ?
C30 H30B 0.9800 . ?
C30 H30C 0.9800 . ?
C31 H31A 0.9800 . ?
C31 H31B 0.9800 . ?
C31 H31C 0.9800 . ?
C32 H32A 0.9800 . ?
C32 H32B 0.9800 . ?
C32 H32C 0.9800 . ?
C33 H33A 0.9800 . ?
C33 H33B 0.9800 . ?
C33 H33C 0.9800 . ?
C34 H34A 0.9800 . ?
C34 H34B 0.9800 . ?
C34 H34C 0.9800 . ?
C35 H35A 0.9800 . ?
C35 H35B 0.9800 . ?
C35 H35C 0.9800 . ?
C36 H36A 0.9800 . ?
C36 H36B 0.9800 . ?
C36 H36C 0.9800 . ?
C37 H37A 0.9800 . ?
C37 H37B 0.9800 . ?
C37 H37C 0.9800 . ?
C38 H38A 0.9800 . ?
C38 H38B 0.9800 . ?
C38 H38C 0.9800 . ?
C39 H39A 0.9800 . ?
C39 H39B 0.9800 . ?
C39 H39C 0.9800 . ?
C40 H40A 0.9800 . ?
C40 H40B 0.9800 . ?
C40 H40C 0.9800 . ?
C41 H41A 0.9800 . ?
C41 H41B 0.9800 . ?
C41 H41C 0.9800 . ?
C42 H42A 0.9800 . ?
C42 H42B 0.9800 . ?
C42 H42C 0.9800 . ?
C43 H43A 0.9800 . ?
C43 H43B 0.9800 . ?
C43 H43C 0.9800 . ?
C44 H44A 0.9800 . ?
C44 H44B 0.9800 . ?
C44 H44C 0.9800 . ?
C45 H45A 0.9800 . ?
C45 H45B 0.9800 . ?
C45 H45C 0.9800 . ?
C46 C47 1.450(8) . ?
C46 H46A 0.9800 . ?
C46 H46B 0.9800 . ?
C46 H46C 0.9800 . ?
C47 C52 1.321(7) . ?
C47 C48 1.438(9) . ?
C48 C49 1.443(9) . ?
C48 H48 0.9500 . ?
C49 C50 1.325(7) . ?
C49 H49 0.9500 . ?
C50 C51 1.407(7) . ?
C50 H50 0.9500 . ?
C51 C52 1.363(7) . ?
C51 H51 0.9500 . ?
C52 H52 0.9500 . ?
 
loop_
 _geom_angle_atom_site_label_1
 _geom_angle_atom_site_label_2
 _geom_angle_atom_site_label_3
 _geom_angle
 _geom_angle_site_symmetry_1
 _geom_angle_site_symmetry_3
 _geom_angle_publ_flag
N5 Ba1 N4 117.29(7) . . ?
N5 Ba1 N3 117.69(6) . . ?
N4 Ba1 N3 125.01(7) . . ?
N5 Ba1 Si3 99.56(5) . . ?
N4 Ba1 Si3 25.69(6) . . ?
N3 Ba1 Si3 137.62(5) . . ?
N5 Ba1 Si1 101.59(5) . . ?
N4 Ba1 Si1 136.76(6) . . ?
N3 Ba1 Si1 25.19(5) . . ?
Si3 Ba1 Si1 158.85(2) . . ?
N5 Ba1 Si6 25.04(5) . . ?
N4 Ba1 Si6 130.95(6) . . ?
N3 Ba1 Si6 100.14(5) . . ?
Si3 Ba1 Si6 107.02(2) . . ?
Si1 Ba1 Si6 92.249(19) . . ?
N5 Ba1 Si5 24.82(5) . . ?
N4 Ba1 Si5 101.75(5) . . ?
N3 Ba1 Si5 129.76(5) . . ?
Si3 Ba1 Si5 92.498(18) . . ?
Si1 Ba1 Si5 106.863(18) . . ?
Si6 Ba1 Si5 49.812(18) . . ?
N5 Ba1 Si2 128.08(5) . . ?
N4 Ba1 Si2 109.61(5) . . ?
N3 Ba1 Si2 24.61(5) . . ?
Si3 Ba1 Si2 114.901(19) . . ?
Si1 Ba1 Si2 49.770(19) . . ?
Si6 Ba1 Si2 104.53(2) . . ?
Si5 Ba1 Si2 148.553(19) . . ?
N5 Ba1 Si4 128.88(5) . . ?
N4 Ba1 Si4 24.35(6) . . ?
N3 Ba1 Si4 109.59(5) . . ?
Si3 Ba1 Si4 49.99(2) . . ?
Si1 Ba1 Si4 114.26(2) . . ?
Si6 Ba1 Si4 150.25(2) . . ?
Si5 Ba1 Si4 106.59(2) . . ?
Si2 Ba1 Si4 103.01(2) . . ?
C1 K1 C1 180.0 . 3_665 ?
C1 K1 C4 47.26(7) . . ?
C1 K1 C4 132.74(7) 3_665 . ?
C1 K1 C4 132.74(7) . 3_665 ?
C1 K1 C4 47.26(7) 3_665 3_665 ?
C4 K1 C4 180.00(9) . 3_665 ?
C1 K1 C9 60.49(6) . . ?
C1 K1 C9 119.51(6) 3_665 . ?
C4 K1 C9 24.34(6) . . ?
C4 K1 C9 155.66(6) 3_665 . ?
C1 K1 C9 119.51(6) . 3_665 ?
C1 K1 C9 60.49(6) 3_665 3_665 ?
C4 K1 C9 155.66(6) . 3_665 ?
C4 K1 C9 24.34(6) 3_665 3_665 ?
C9 K1 C9 180.00(9) . 3_665 ?
C1 K1 C5 62.60(7) . . ?
C1 K1 C5 117.40(7) 3_665 . ?
C4 K1 C5 23.98(6) . . ?
C4 K1 C5 156.02(6) 3_665 . ?
C9 K1 C5 42.18(7) . . ?
C9 K1 C5 137.82(7) 3_665 . ?
C1 K1 C5 117.40(7) . 3_665 ?
C1 K1 C5 62.60(7) 3_665 3_665 ?
C4 K1 C5 156.02(6) . 3_665 ?
C4 K1 C5 23.98(6) 3_665 3_665 ?
C9 K1 C5 137.82(7) . 3_665 ?
C9 K1 C5 42.18(7) 3_665 3_665 ?
C5 K1 C5 180.00(2) . 3_665 ?
C1 K1 N1 22.52(6) . . ?
C1 K1 N1 157.48(6) 3_665 . ?
C4 K1 N1 24.81(5) . . ?
C4 K1 N1 155.19(5) 3_665 . ?
C9 K1 N1 41.67(5) . . ?
C9 K1 N1 138.33(5) 3_665 . ?
C5 K1 N1 41.78(6) . . ?
C5 K1 N1 138.22(6) 3_665 . ?
C1 K1 N1 157.48(6) . 3_665 ?
C1 K1 N1 22.52(6) 3_665 3_665 ?
C4 K1 N1 155.19(5) . 3_665 ?
C4 K1 N1 24.81(5) 3_665 3_665 ?
C9 K1 N1 138.33(5) . 3_665 ?
C9 K1 N1 41.67(5) 3_665 3_665 ?
C5 K1 N1 138.22(6) . 3_665 ?
C5 K1 N1 41.78(6) 3_665 3_665 ?
N1 K1 N1 180.00(6) . 3_665 ?
C1A K1A C1A 180.00(14) . 3 ?
C1A K1A C4A 132.11(7) . 3 ?
C1A K1A C4A 47.89(7) 3 3 ?
C1A K1A C4A 47.89(7) . . ?
C1A K1A C4A 132.11(7) 3 . ?
C4A K1A C4A 180.00(8) 3 . ?
C1A K1A C9A 117.09(7) . 3 ?
C1A K1A C9A 62.91(7) 3 3 ?
C4A K1A C9A 25.38(6) 3 3 ?
C4A K1A C9A 154.62(6) . 3 ?
C1A K1A C9A 62.91(7) . . ?
C1A K1A C9A 117.09(7) 3 . ?
C4A K1A C9A 154.62(6) 3 . ?
C4A K1A C9A 25.38(6) . . ?
C9A K1A C9A 180.00(11) 3 . ?
C1A K1A N1A 157.09(6) . 3 ?
C1A K1A N1A 22.91(6) 3 3 ?
C4A K1A N1A 24.98(5) 3 3 ?
C4A K1A N1A 155.02(5) . 3 ?
C9A K1A N1A 42.89(6) 3 3 ?
C9A K1A N1A 137.11(6) . 3 ?
C1A K1A N1A 22.91(6) . . ?
C1A K1A N1A 157.09(6) 3 . ?
C4A K1A N1A 155.02(5) 3 . ?
C4A K1A N1A 24.98(5) . . ?
C9A K1A N1A 137.11(6) 3 . ?
C9A K1A N1A 42.89(6) . . ?
N1A K1A N1A 180.00(6) 3 . ?
C1A K1A C5A 62.25(6) . . ?
C1A K1A C5A 117.75(6) 3 . ?
C4A K1A C5A 155.94(6) 3 . ?
C4A K1A C5A 24.06(6) . . ?
C9A K1A C5A 136.91(6) 3 . ?
C9A K1A C5A 43.09(6) . . ?
N1A K1A C5A 138.14(5) 3 . ?
N1A K1A C5A 41.86(5) . . ?
C1A K1A C5A 117.75(6) . 3 ?
C1A K1A C5A 62.25(6) 3 3 ?
C4A K1A C5A 24.06(6) 3 3 ?
C4A K1A C5A 155.94(6) . 3 ?
C9A K1A C5A 43.09(6) 3 3 ?
C9A K1A C5A 136.91(6) . 3 ?
N1A K1A C5A 41.86(5) 3 3 ?
N1A K1A C5A 138.14(5) . 3 ?
C5A K1A C5A 180.00(7) . 3 ?
N3 Si1 C29 115.08(15) . . ?
N3 Si1 C30 114.44(16) . . ?
[truncated: 45,900 more chars]
